# Supplementary material for: Body mass index and adipose distribution have opposing genetic impacts on human blood traits
Source: eLife journal article supplement (doi:10.7554/elife.75317), 2022-02-15
Supplement: supp [file elife_poa_e75317_Figure_2_figure_supplement_1.pdf › elife_poa_e75317_Figure_2_figure_supplement_1.pdf]

a

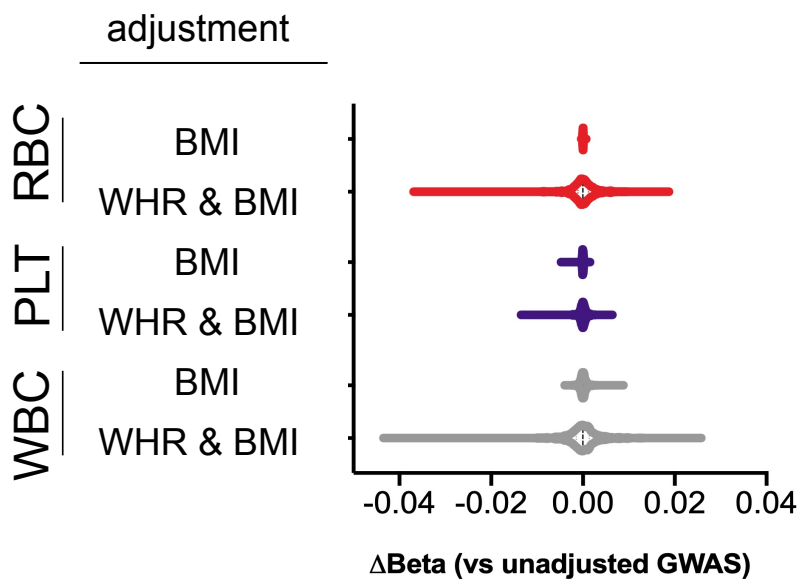

b

WHR & BMI adjusted

RBC

PLT

WBC

All genome-wide significant loci

| GO Biological Process                       | #Genes | Fold Enrichment | P-value  |
|---------------------------------------------|--------|-----------------|----------|
| hemopoiesis                                 | 109    | 2.36            | 1.99E-10 |
| hematopoietic or lymphoid organ development | 115    | 2.3             | 1.84E-10 |
| regulation of hemopoiesis                   | 59     | 2.1             | 8.00E-03 |

Loci in top/bottom 10%/changed effect sizes

| GO Biological Process                       | #Genes | Fold Enrichment | P-value  |
|---------------------------------------------|--------|-----------------|----------|
| erythrocyte differentiation                 | 12     | 6.96            | 4.57E-03 |
| erythrocyte homeostasis                     | 12     | 6.3             | 1.19E-02 |
| hemopoiesis                                 | 36     | 3.1             | 5.71E-05 |
| hematopoietic or lymphoid organ development | 38     | 3.02            | 4.09E-05 |

All genome-wide significant loci

| GO Biological Process                       | #Genes | Fold Enrichment | P-value  |
|---------------------------------------------|--------|-----------------|----------|
| megakaryocyte development                   | 11     | 7.78            | 3.02E-02 |
| hemostasis                                  | 43     | 2.97            | 6.39E-05 |
| hemopoiesis                                 | 123    | 2.56            | 3.38E-14 |
| hematopoietic or lymphoid organ development | 129    | 2.48            | 5.01E-14 |
| regulation of hemopoiesis                   | 64     | 2.18            | 1.06E-03 |

Loci in top/bottom 10%/changed effect sizes

| GO Biological Process                       | #Genes | Fold Enrichment | P-value  |
|---------------------------------------------|--------|-----------------|----------|
| hemopoiesis                                 | 31     | 2.72            | 9.51E-03 |
| hematopoietic or lymphoid organ development | 32     | 2.6             | 1.68E-02 |

All genome-wide significant loci

| GO Biological Process                       | #Genes | Fold Enrichment | P-value  |
|---------------------------------------------|--------|-----------------|----------|
| positive regulation of hemopoiesis          | 38     | 3.26            | 4.70E-05 |
| negative regulation of hemopoiesis          | 25     | 3.22            | 2.31E-02 |
| regulation of hemopoiesis                   | 71     | 2.69            | 4.73E-08 |
| hemopoiesis                                 | 113    | 2.61            | 1.07E-13 |
| hematopoietic or lymphoid organ development | 120    | 2.56            | 3.57E-14 |

Loci in top/bottom 10%/changed effect sizes

| GO Biological Process                       | #Genes | Fold Enrichment | P-value  |
|---------------------------------------------|--------|-----------------|----------|
| hemopoiesis                                 | 31     | 2.83            | 4.30E-03 |
| hematopoietic or lymphoid organ development | 32     | 2.7             | 7.56E-03 |

All

Most changed  
(top & bottom 10%)
