# Supplementary material for: Body mass index and adipose distribution have opposing genetic impacts on human blood traits
Source: eLife. 2022 Feb 15;11:e75317. doi: 10.7554/eLife.75317 (PMC8884725; doi:10.7554/eLife.75317)
Supplement: Supplementary file 1. [file elife-75317-supp1.xlsx]

## Sheet: Supp Table 1
Exposure	Outcome	Sample size (Exposure)	Narrow-sense h2	F statistic
BMI	BAS	484680	0.104388	44.4352
BMI	EOS	484680	0.104388	44.4352
BMI	HCT	484680	0.104388	44.4352
BMI	HGB	484680	0.104388	44.4352
BMI	LYM	484680	0.104388	44.4352
BMI	MCHC	484680	0.104388	44.4352
BMI	MCH	484680	0.104388	44.4352
BMI	MCV	484680	0.104388	44.4352
BMI	MON	484680	0.104388	44.4352
BMI	MPV	484680	0.104388	44.4352
BMI	NEU	484680	0.104388	44.4352
BMI	PLT	484680	0.104388	44.4352
BMI	RBC	484680	0.104388	44.4352
BMI	RDW	484680	0.104388	44.4352
BMI	WBC	484680	0.104388	44.4352
TC	BAS	215551	0.0849077	122.607
TC	EOS	215551	0.0849077	122.607
TC	HCT	215551	0.0849077	122.607
TC	HGB	215551	0.0849077	122.607
TC	LYM	215551	0.0849077	122.607
TC	MCHC	215551	0.0849077	122.607
TC	MCH	215551	0.0849077	122.607
TC	MCV	215551	0.0849077	122.607
TC	MON	215551	0.0849077	122.607
TC	MPV	215551	0.0849077	122.607
TC	NEU	215551	0.0849077	122.607
TC	PLT	215551	0.0849077	122.607
TC	RBC	215551	0.0849077	122.607
TC	RDW	215551	0.0849077	122.607
TC	WBC	215551	0.0849077	122.607
HDL	BAS	210967	0.123343	132.963
HDL	EOS	210967	0.123343	132.963
HDL	HCT	210967	0.123343	132.963
HDL	HGB	210967	0.123343	132.963
HDL	LYM	210967	0.123343	132.963
HDL	MCHC	210967	0.123343	132.963
HDL	MCH	210967	0.123343	132.963
HDL	MCV	210967	0.123343	132.963
HDL	MON	210967	0.123343	132.963
HDL	MPV	210967	0.123343	132.963
HDL	NEU	210967	0.123343	132.963
HDL	PLT	210967	0.123343	132.963
HDL	RBC	210967	0.123343	132.963
HDL	RDW	210967	0.123343	132.963
HDL	WBC	210967	0.123343	132.963
LDL	BAS	215196	0.0947653	153.146
LDL	EOS	215196	0.0947653	153.146
LDL	HCT	215196	0.0947653	153.146
LDL	HGB	215196	0.0947653	153.146
LDL	LYM	215196	0.0947653	153.146
LDL	MCHC	215196	0.0947653	153.146
LDL	MCH	215196	0.0947653	153.146
LDL	MCV	215196	0.0947653	153.146
LDL	MON	215196	0.0947653	153.146
LDL	MPV	215196	0.0947653	153.146
LDL	NEU	215196	0.0947653	153.146
LDL	PLT	215196	0.0947653	153.146
LDL	RBC	215196	0.0947653	153.146
LDL	RDW	215196	0.0947653	153.146
LDL	WBC	215196	0.0947653	153.146
TG	BAS	211491	0.116372	133.776
TG	EOS	211491	0.116372	133.776
TG	HCT	211491	0.116372	133.776
TG	HGB	211491	0.116372	133.776
TG	LYM	211491	0.116372	133.776
TG	MCHC	211491	0.116372	133.776
TG	MCH	211491	0.116372	133.776
TG	MCV	211491	0.116372	133.776
TG	MON	211491	0.116372	133.776
TG	MPV	211491	0.116372	133.776
TG	NEU	211491	0.116372	133.776
TG	PLT	211491	0.116372	133.776
TG	RBC	211491	0.116372	133.776
TG	RDW	211491	0.116372	133.776
TG	WBC	211491	0.116372	133.776
BAS	BMI	563085	0.0543403	98.8919
EOS	BMI	563085	0.204475	131.077
HCT	BMI	563085	0.145495	93.9171
HGB	BMI	563085	0.159829	98.4448
LYM	BMI	563085	0.202209	113.649
MCHC	BMI	563085	0.103149	135.939
MCH	BMI	563085	0.335101	213.352
MCV	BMI	563085	0.329294	176.724
MON	BMI	563085	0.261052	148.877
MPV	BMI	563085	0.368901	219.284
NEU	BMI	563085	0.145759	102.697
PLT	BMI	563085	0.287696	138.865
RBC	BMI	563085	0.214403	110.365
RDW	BMI	563085	0.22807	152.755
WBC	BMI	563085	0.191029	106.222
WHR	BAS	485486	0.0565136	45.4486
WHR	EOS	485486	0.0565136	45.4486
WHR	HCT	485486	0.0565136	45.4486
WHR	HGB	485486	0.0565136	45.4486
WHR	LYM	485486	0.0565136	45.4486
WHR	MCHC	485486	0.0565136	45.4486
WHR	MCH	485486	0.0565136	45.4486
WHR	MCV	485486	0.0565136	45.4486
WHR	MON	485486	0.0565136	45.4486
WHR	MPV	485486	0.0565136	45.4486
WHR	NEU	485486	0.0565136	45.4486
WHR	PLT	485486	0.0565136	45.4486
WHR	RBC	485486	0.0565136	45.4486
WHR	RDW	485486	0.0565136	45.4486
WHR	WBC	485486	0.0565136	45.4486
WHRadjBMI	BAS	484563	0.0752228	58.7471
WHRadjBMI	EOS	484563	0.0752228	58.7471
WHRadjBMI	HCT	484563	0.0752228	58.7471
WHRadjBMI	HGB	484563	0.0752228	58.7471
WHRadjBMI	LYM	484563	0.0752228	58.7471
WHRadjBMI	MCHC	484563	0.0752228	58.7471
WHRadjBMI	MCH	484563	0.0752228	58.7471
WHRadjBMI	MCV	484563	0.0752228	58.7471
WHRadjBMI	MON	484563	0.0752228	58.7471
WHRadjBMI	MPV	484563	0.0752228	58.7471
WHRadjBMI	NEU	484563	0.0752228	58.7471
WHRadjBMI	PLT	484563	0.0752228	58.7471
WHRadjBMI	RBC	484563	0.0752228	58.7471
WHRadjBMI	RDW	484563	0.0752228	58.7471
WHRadjBMI	WBC	484563	0.0752228	58.7471
BAS	CAD	563085	0.0522056	97.4774
EOS	CAD	563085	0.196572	129.725
HCT	CAD	563085	0.142665	93.4398
HGB	CAD	563085	0.154686	97.3006
LYM	CAD	563085	0.196233	113.275
MCHC	CAD	563085	0.324042	209.095
MCH	CAD	563085	0.0988021	135.568
MCV	CAD	563085	0.320449	175.491
MON	CAD	563085	0.250696	145.029
MPV	CAD	563085	0.353749	213.944
NEU	CAD	563085	0.141528	102.41
PLT	CAD	563085	0.278824	137.225
RBC	CAD	563085	0.206961	107.711
RDW	CAD	563085	0.224187	153.36
WBC	CAD	563085	0.185224	105.041

## Sheet: Supp Table 2
Exposure	Mediator	Outcome	Total Effect (SD units)	SE (random effects)	Direct Effect (SD units)	SE (random effects)
TC	BMI	HCT	-0.101719	0.0307191	-0.11848	0.0319944
TC	BMI	HGB	-0.102165	0.0332416	-0.127155	0.0345344
BMI	TC	HCT	-0.046255	0.0125936	-0.0508305	0.0125021
BMI	TC	HGB	-0.053551	0.0131598	-0.0571877	0.0131301
TG	BMI	HCT	-0.00583291	0.0202772	-0.00960792	0.00388716
TG	BMI	HGB	0.0354224	0.0221385	0.0307878	0.0222667
BMI	TG	HCT	-0.0501905	0.0121082	-0.0564604	0.0126808
BMI	TG	HGB	-0.057333	0.0126621	-0.0718336	0.0131906
LDL	BMI	HCT	-0.0759741	0.0307374	-0.0884465	0.0311384
LDL	BMI	HGB	-0.0849942	0.0352459	-0.105179	0.0354902
BMI	LDL	HCT	-0.049413	0.0120983	-0.053788	0.0120142
BMI	LDL	HGB	-0.0567354	0.0126449	-0.0606679	0.0125962
HDL	BMI	HCT	-0.0332918	0.016655	-0.0336759	0.016786
HDL	BMI	HGB	-0.0614441	0.0176784	-0.0630983	0.0177883
BMI	HDL	HCT	-0.049413	0.0120983	-0.0735514	0.0138918
BMI	HDL	HGB	-0.0567354	0.0126449	-0.0914232	0.0144368

## Sheet: Supp Table 3
Exposure	Outcome	Direction	snp_r2 (Exposure)	r2 (Exposure)	snp_r2 (Outcome)	r2 (Outcome)	Sensitivity ratio	Steiger p-value
BMI	HCT	FALSE	0.00821855	0.0257169	0.0187501	0.052227	2.30945	2.58604e-143
BMI	HGB	FALSE	0.00956017	0.032945	0.0208667	0.0611657	2.1536	3.64333e-147
TC	HCT	FALSE	0.0202975	0.0854502	0.014812	0.0669569	1.42056	8.2835e-17
TC	HGB	FALSE	0.0163513	0.0761469	0.0182669	0.110135	1.75472	0.00348341
TG	HCT	TRUE	0.0234087	0.173561	0.0115583	0.0611348	5.01243	2.97825e-73
TG	HGB	TRUE	0.0173287	0.171271	0.0151086	0.0805128	3.44167	0.000517865
LDL	HCT	TRUE	0.0161211	0.0821061	0.0132867	0.0624879	1.47172	2.86937e-06
LDL	HGB	FALSE	0.0150885	0.0800788	0.0195808	0.113582	1.71626	7.47638e-12
HDL	HCT	TRUE	0.0225917	0.124373	0.00692573	0.0416241	4.51845	3.79191e-156
HDL	HGB	TRUE	0.0220287	0.130714	0.00787807	0.0515417	3.82331	3.71581e-124

## Sheet: Supp Table 4
New loci after adjustment
CHR	POS	POS	SNP	A1	A2	freq	b	se	p	N	bC	bC_se	bC_pval	NearestGene	dBeta	dP
2	227528914	227528914	rs2707543	T	G	0.522903	-0.009998	0.001846	6.19e-08	558757	-0.0101311	0.00184568	4.04071e-08	IRS1	-0.0001331	0.185233
4	83553993	83553993	rs7691204	T	A	0.187221	0.012809	0.002354	5.41e-08	563942	0.0128484	0.00235363	4.78835e-08	SCD5	3.94e-05	0.0530114
5	159248887	159248887	rs60191820	A	G	0.052357	0.022534	0.004149	5.71e-08	563945	0.0227928	0.00414829	3.91823e-08	ADA1B	0.0002588	0.163546
6	33596031	33596031	rs147497774	G	C	0.007963	-0.060146	0.01111	6.31e-08	556856	-0.0606068	0.0111083	4.86937e-08	ITPR3	-0.0004608	0.112557
7	116183003	116183003	rs10241283	G	A	0.224631	-0.01203	0.002228	6.85e-08	563943	-0.0121828	0.00222765	4.52842e-08	CAV1	-0.0001528	0.179744
8	42140549	42140549	rs5029748	T	G	0.270306	0.011512	0.00213	6.61e-08	560787	0.0116155	0.00212963	4.91839e-08	IKKB	0.0001035	0.128378
8	47825165	47825165	rs11777999	C	T	0.322755	0.010897	0.001998	5.06e-08	559700	0.0109315	0.00199765	4.4456e-08	SPIDR	3.45e-05	0.0562201
8	76439633	76439633	rs2941448	C	T	0.437438	-0.010018	0.001853	6.53e-08	563004	-0.0102078	0.00185268	3.5941e-08	HNF4G	-0.0001898	0.259323
9	102976644	102976644	rs1014651	A	G	0.526397	0.009823	0.001847	1.06e-07	563933	0.0100719	0.00184671	4.92568e-08	INVS	0.0002489	0.33284
9	135992797	135992797	rs118119692	T	C	0.03589	-0.027714	0.005099	5.61e-08	563945	-0.0277929	0.00509819	4.9942e-08	GNDS	-7.89e-05	0.0504969
9	139440845	139440845	rs3013306	A	G	0.641526	-0.011009	0.002037	6.67e-08	498693	-0.01111	0.00203665	4.896e-08	NOTC1	-0.000101	0.134284
10	93764606	93764606	rs145771334	C	T	0.016767	0.041242	0.007569	5.18e-08	563946	0.0415771	0.00756782	3.9307e-08	BTAF1	0.0003351	0.11986
13	76058349	76058349	rs60343330	T	G	0.09756	0.017679	0.003273	6.74e-08	509035	0.0178811	0.00327246	4.65238e-08	TBCD4	0.0002021	0.160985
16	4157696	4157696	rs370222	A	G	0.299895	0.011045	0.002037	6.02e-08	563000	0.0112052	0.00203668	3.76164e-08	ADCY9	0.0001602	0.204219
16	31002720	31002720	rs8060857	A	G	0.626923	0.010298	0.001908	6.88e-08	563939	0.010606	0.00190767	2.70256e-08	STX1B	0.000308	0.405813
17	8040151	8040151	rs58356259	T	C	0.466505	0.010164	0.001867	5.37e-08	563923	0.0101985	0.0018667	4.67156e-08	PER1	3.45e-05	0.0605124
18	74167077	74167077	rs678870	A	G	0.43031	0.010254	0.001889	5.78e-08	560785	0.0103329	0.00188867	4.47597e-08	ZN516	7.89e-05	0.111041
20	34432882	34432882	rs73902914	G	A	0.103756	-0.016335	0.003022	6.63e-08	563945	-0.0165568	0.00302152	4.26241e-08	PHF20	-0.0002218	0.191858
Clarified loci after adjustment
CHR	POS	POS	SNP	A1	A2	freq	b	se	p	N	bC	bC_se	bC_pval	NearestGene	dBeta	dP
1	56620268	56620268	rs778121	C	T	0.357488	0.010725	0.001912	2.09e-08	563939	0.0107299	0.00191168	1.99035e-08	LPP3	4.9e-06	0.0212168
1	156148165	156148165	rs6701295	C	T	0.421453	0.011357	0.001867	1.21e-09	561915	0.0112387	0.00186669	1.73698e-09	SEM4A	-0.0001183	-0.157009
1	182994115	182994115	rs4652764	G	A	0.453311	-0.011247	0.001858	1.47e-09	559702	-0.0112396	0.0018577	1.44608e-09	LAMC1	7.4e-06	0.00712502
1	214723168	214723168	rs4072932	G	T	0.283048	0.013329	0.002037	6.2e-11	562536	0.0133881	0.00203665	4.91129e-11	PTN14	5.91e-05	0.101196
2	208507674	208507674	rs13023972	T	C	0.542328	0.013389	0.00185	4.74e-13	559844	0.0134087	0.00184971	4.1955e-13	MT21A	1.97e-05	0.0529946
2	211258344	211258344	rs1458281	G	A	0.444306	0.010817	0.001857	5.81e-09	559203	0.0106346	0.00185668	1.01759e-08	LANC1	-0.0001824	-0.243397
2	228210499	228210499	rs6721179	G	A	0.328864	-0.011864	0.001962	1.51e-09	559844	-0.011896	0.00196166	1.32562e-09	MFF	-3.2e-05	0.0565579
3	58169725	58169725	rs11711639	C	T	0.051479	0.026991	0.0042	1.35e-10	563003	0.0271586	0.00419928	9.96828e-11	DNSL3	0.0001676	0.131714
3	58456811	58456811	rs11719450	T	C	0.371107	-0.020207	0.001915	5.32e-26	559846	-0.0204288	0.00191468	1.41257e-26	KCTD6	-0.0002218	0.575902
3	66397853	66397853	rs4261818	G	A	0.602001	-0.013611	0.001881	4.86e-13	563945	-0.0134065	0.0018807	1.01505e-12	SAMC	0.0002045	-0.319851
3	66432307	66432307	rs6787828	A	G	0.07202	0.022172	0.003566	5.18e-10	562361	0.0221005	0.00356539	5.69567e-10	LRIG1	-7.15e-05	-0.0412151
3	66873257	66873257	rs13433731	C	T	0.076345	0.02029	0.00348	5.66e-09	560787	0.0203073	0.00347941	5.33404e-09	KBTB8	1.73e-05	0.0257602
3	66903366	66903366	rs34430548	T	A	0.230233	-0.016537	0.002252	2.17e-13	563002	-0.0167317	0.00225164	1.07877e-13	KBTB8	-0.0001947	0.303531
3	69841880	69841880	rs17006441	A	C	0.418776	0.022179	0.001866	1.52e-32	563940	0.0223145	0.0018657	5.72887e-33	MITF	0.0001355	0.423775
3	71263236	71263236	rs12492363	A	G	0.404347	0.011856	0.00188	2.95e-10	562855	0.0119521	0.00187967	2.03595e-10	FOXP1	9.61e-05	0.161055
4	86762295	86762295	rs1510584	G	C	0.381781	0.010959	0.0019	8.25e-09	563943	0.0109097	0.00189967	9.30401e-09	RHG24	-4.93e-05	-0.0522162
4	95927417	95927417	rs61018424	T	C	0.161831	-0.015716	0.002498	3.23e-10	563895	-0.0157604	0.00249761	2.78722e-10	BMR1B	-4.44e-05	0.0640313
6	24850752	24850752	rs114950400	T	C	0.028446	-0.037682	0.005604	1.83e-11	563945	-0.0379063	0.00560312	1.33122e-11	FA65B	-0.0002243	0.138201
6	24926344	24926344	rs2394322	C	T	0.332127	0.015931	0.001996	1.52e-15	563005	0.0161602	0.00199568	5.60565e-16	FA65B	0.0002292	0.433218
6	24978511	24978511	rs12193223	G	C	0.058009	0.057905	0.003983	7.56e-48	562088	0.0583313	0.00398234	1.39784e-48	FA65B	0.0004263	0.733064
6	25035920	25035920	rs303890	A	G	0.303944	-0.012114	0.002066	4.69e-09	561276	-0.0122101	0.00206564	3.39913e-09	FA65B	-9.61e-05	0.139805
6	25224925	25224925	rs9467442	G	A	0.148867	-0.021784	0.002576	2.9e-17	563942	-0.021959	0.00257559	1.51738e-17	LR16A	-0.000175	0.281304
6	25401075	25401075	rs75078685	T	C	0.057738	-0.022549	0.00396	1.27e-08	563005	-0.0227856	0.0039594	8.6739e-09	LR16A	-0.0002366	0.165589
6	25409010	25409010	rs77566124	A	G	0.134822	0.053719	0.002713	3.49e-87	563919	0.05382	0.00271257	1.31934e-87	LR16A	0.000101	0.422469
6	25450026	25450026	rs9295661	C	A	0.081706	-0.060838	0.003369	7.35e-73	560788	-0.0611165	0.00336841	1.43241e-73	LR16A	-0.0002785	0.71022
6	25526319	25526319	rs149359690	T	C	0.095714	0.116186	0.003128	8.27e-302	563937	0.116326	0.00312752	8.38199e-303	LR16A	0.00014	0.994158
6	25546620	25546620	rs72839077	A	G	0.013036	-0.047187	0.0082	8.93e-09	563297	-0.0471525	0.00819873	8.86156e-09	LR16A	3.45e-05	0.00334128
6	25684279	25684279	rs4712955	A	G	0.462141	-0.035242	0.001852	1.06e-80	561275	-0.0352814	0.00185168	6.11951e-81	SEGN	-3.94e-05	0.238589
6	25710632	25710632	rs80140867	T	C	0.007857	0.09365	0.017135	4.73e-08	445208	0.094372	0.017132	3.61858e-08	SEGN	0.000722	0.116323
6	25726169	25726169	rs376449185	T	C	0.00538	0.105729	0.01341	3.31e-15	558195	0.105813	0.013408	2.97874e-15	H2A1A	8.4e-05	0.0457954
6	25751320	25751320	rs10498728	A	T	0.291675	-0.033612	0.002028	1.27e-61	560785	-0.0336613	0.00202765	6.8357e-62	S17A4	-4.93e-05	0.269021
6	25787610	25787610	rs189493943	T	C	0.005018	0.085347	0.013726	5.19e-10	554990	0.0855269	0.0137239	4.60633e-10	NPT1	0.0001799	0.0518123
6	25804292	25804292	rs113531866	A	G	0.011093	-0.086449	0.010898	2.26e-15	560505	-0.0855766	0.0108964	4.04027e-15	NPT1	0.0008724	-0.252302
6	25947649	25947649	rs139941047	A	G	0.006135	0.07014	0.012513	2.13e-08	563946	0.0700833	0.0125112	2.1231e-08	TRI38	-5.67e-05	0.00140915
6	25958568	25958568	rs116100333	A	G	0.002261	0.137897	0.021434	1.29e-10	539383	0.137848	0.0214307	1.25736e-10	TRI38	-4.9e-05	0.0111301
6	25961352	25961352	rs67491322	T	C	0.10265	-0.068589	0.003023	6.26e-114	563943	-0.0689784	0.00302252	2.80737e-115	TRI38	-0.0003894	1.34827
6	26072095	26072095	rs9968910	C	A	0.355662	0.083314	0.001916	1e-300	562858	0.0835826	0.0019157	1e-300	H12	0.0002686	0
6	26072292	26072292	rs145742330	A	C	0.004199	0.09348	0.015071	5.73e-10	558197	0.0940517	0.0150687	4.3332e-10	HFE	0.0005717	0.121346
6	26095665	26095665	rs7762959	T	C	0.12014	-0.049564	0.00282	4.05e-69	563927	-0.0496133	0.00281955	2.63684e-69	HFE	-4.93e-05	0.186371
6	26191139	26191139	rs138636573	A	T	0.002629	0.157483	0.022463	2.47e-12	548797	0.156965	0.0224595	2.77181e-12	H4	-0.000518	-0.0500665
6	26260695	26260695	rs112252880	A	G	0.013683	0.068927	0.008727	2.97e-15	563296	0.0694371	0.00872568	1.75138e-15	H2B1H	0.0005101	0.229376
6	26327087	26327087	rs6932727	C	A	0.539319	0.052539	0.001846	5.15e-178	562859	0.0524799	0.00184571	7.8084e-178	BT3A2	-5.91e-05	-0.180755
6	26344333	26344333	rs116161667	C	T	0.014175	0.11417	0.008533	8.79e-41	458852	0.114584	0.00853157	4.00244e-41	BT3A2	0.000414	0.341664
6	26352539	26352539	rs73740106	A	G	0.006978	-0.065985	0.011223	4.22e-09	555214	-0.065709	0.0112211	4.74618e-09	BT3A2	0.000276	-0.0510318
6	26462067	26462067	rs146093705	G	A	0.032069	-0.04932	0.00559	1.19e-18	563930	-0.0498326	0.00558913	4.83484e-19	BT2A1	-0.0005126	0.391165
6	26463574	26463574	rs13195401	T	G	0.1022	-0.060004	0.003038	9.36e-87	562995	-0.0603416	0.00303752	8.10331e-88	BT2A1	-0.0003376	1.06261
6	26493996	26493996	rs116813392	C	T	0.013288	-0.054019	0.008085	2.45e-11	560941	-0.0538539	0.00808365	2.69989e-11	BT1A1	0.0001651	-0.04218
6	26494975	26494975	rs145513964	G	A	0.009903	0.222216	0.013984	8.24e-57	447528	0.22226	0.0139817	6.69621e-57	BT1A1	4.4e-05	0.0900981
6	26561464	26561464	rs142880943	T	C	0.019854	0.053829	0.006823	3.18e-15	563944	0.0535776	0.00682197	4.03976e-15	HMGN4	-0.0002514	-0.103928
6	26587096	26587096	rs143504681	G	A	0.012882	0.072784	0.008825	1.7e-16	563023	0.0726879	0.00882364	1.75327e-16	ABT1	-9.61e-05	-0.0133999
6	26636647	26636647	rs2494703	G	A	0.193648	0.040117	0.003167	9.95e-37	560444	0.040016	0.00316648	1.31367e-36	ZN322	-0.000101	-0.120663
6	27069227	27069227	rs114280528	G	A	0.024176	0.03921	0.006039	8.71e-11	563945	0.0390523	0.00603808	9.95272e-11	H2B1J	-0.0001577	-0.0579236
6	27091661	27091661	rs66462181	C	T	0.103515	-0.05912	0.003019	2.6e-85	563943	-0.0594502	0.00301852	2.37347e-86	H2B1J	-0.0003302	1.03959
6	27152795	27152795	rs1102559	T	C	0.175212	-0.014737	0.002413	1.05e-09	563945	-0.0145571	0.00241258	1.60126e-09	H2A1H	0.0001799	-0.183273
6	27223242	27223242	rs3734577	T	C	0.054998	-0.028282	0.004034	2.46e-12	563006	-0.02842	0.00403334	1.8378e-12	TSSP	-0.000138	0.126637
6	27800840	27800840	rs192601526	T	G	0.00657	-0.07245	0.011664	5.4e-10	557470	-0.0718881	0.0116621	7.0827e-10	H4	0.0005619	-0.117805
6	28599676	28599676	rs13220637	A	G	0.273916	-0.038566	0.002065	9.06e-78	562855	-0.0388445	0.00206467	5.81183e-79	SCND3	-0.0002785	1.19282
6	29341666	29341666	rs3117440	T	A	0.042812	0.068697	0.004551	1.97e-51	558844	0.069148	0.00455022	3.72344e-52	O12D3	0.000451	0.723522
6	29488637	29488637	rs1419644	T	A	0.018961	-0.037494	0.006792	3.46e-08	558840	-0.0376123	0.00679081	3.04724e-08	MAS1L	-0.0001183	0.0551694
6	29499686	29499686	rs138551799	T	G	0.006942	-0.07231	0.011223	1.21e-10	552368	-0.0719847	0.0112212	1.4076e-10	UBD	0.0003253	-0.0656939
6	29914533	29914533	rs376253	A	G	0.254144	-0.037694	0.002118	7.85e-71	563916	-0.0380464	0.00211767	3.5865e-72	1A03	-0.0003524	1.3402
6	29938981	29938981	rs192646871	T	C	0.000628	0.341846	0.059651	1.03e-08	463418	0.344547	0.0596412	7.60471e-09	1A03	0.002701	0.131755
6	30021749	30021749	rs259948	T	C	0.036747	0.056268	0.004888	1.25e-30	558841	0.0566648	0.00488724	4.39791e-31	RPA12	0.0003968	0.453664
6	30027860	30027860	rs3132129	A	G	0.092282	0.054449	0.003178	9.18e-66	557904	0.0544638	0.00317745	7.37483e-66	RPA12	1.48e-05	0.0950907
6	30074017	30074017	rs3778620	G	A	0.068969	0.022646	0.003817	3.06e-09	557257	0.0228604	0.00381635	2.09694e-09	TRI31	0.0002144	0.164135
6	30077229	30077229	rs2523990	G	A	0.536601	-0.022628	0.001852	2.82e-34	553016	-0.0226132	0.00185167	2.67208e-34	TRI31	1.48e-05	0.0233997
6	30766634	30766634	rs3130643	A	T	0.15746	0.035991	0.002535	1.03e-45	558843	0.0361906	0.0025346	2.97366e-46	IEX1	0.0001996	0.539546
6	31009137	31009137	rs2523901	C	T	0.364139	-0.025481	0.001907	1.14e-40	562673	-0.0255894	0.00190671	4.57015e-41	MUC22	-0.0001084	0.396974
6	31053843	31053843	rs12202207	T	C	0.019797	-0.044667	0.006596	1.32e-11	563944	-0.0449159	0.00659486	9.70976e-12	CF015	-0.0002489	0.133365
6	31209045	31209045	rs3130534	A	G	0.597063	-0.015885	0.00187	2.07e-17	558101	-0.0159713	0.00186968	1.31633e-17	1C07	-8.63e-05	0.196606
6	31274298	31274298	rs9264941	A	G	0.162972	-0.025467	0.00249	1.63e-24	563940	-0.0254276	0.00248961	1.72594e-24	1C07	3.94e-05	-0.0248381
6	31347144	31347144	rs3094600	A	G	0.270781	-0.02417	0.002064	1.21e-31	561273	-0.0243326	0.00206365	4.33865e-32	1B07	-0.0001626	0.445431
6	31432587	31432587	rs77424484	C	T	0.023531	0.041075	0.006073	1.39e-11	562363	0.0408581	0.00607207	1.70987e-11	MICB	-0.0002169	-0.0899483
6	31445345	31445345	rs2596534	C	T	0.40694	-0.013053	0.001867	2.83e-12	561273	-0.0131984	0.0018667	1.54449e-12	MICB	-0.0001454	0.263001
6	31681905	31681905	rs112665528	T	C	0.018481	0.045837	0.006825	1.93e-11	562087	0.0463989	0.00682394	1.05034e-11	LY66F	0.0005619	0.264227
6	43761091	43761091	rs78807370	A	G	0.148916	-0.015304	0.002719	1.86e-08	508096	-0.0156194	0.00271856	9.16562e-09	VEGFA	-0.0003154	0.307351
6	166162335	166162335	rs2934849	T	C	0.36762	0.012193	0.001912	1.85e-10	559847	0.0121092	0.00191167	2.38308e-10	PDE10	-8.38e-05	-0.109967
7	101078584	101078584	rs4727493	T	C	0.530275	0.010121	0.001843	4.06e-08	562855	0.0101703	0.00184271	3.40543e-08	COQA1	4.93e-05	0.0763541
9	92209279	92209279	rs6559365	A	G	0.497607	-0.0115	0.001843	4.48e-10	563941	-0.0117933	0.00184271	1.55425e-10	GA45G	-0.0002933	0.459757
10	38401417	38401417	rs176880	G	C	0.428621	0.010765	0.001868	8.48e-09	559685	0.0107872	0.00186768	7.66261e-09	ZN37A	2.22e-05	0.0440191
10	70681710	70681710	rs73268355	T	C	0.01812	0.044223	0.006974	2.36e-10	562995	0.0442698	0.00697289	2.16929e-10	DDX50	4.68e-05	0.0365944
10	71088538	71088538	rs10998719	A	G	0.129528	-0.026634	0.002874	2.02e-20	562359	-0.0265527	0.00287351	2.4536e-20	HXK1	8.13e-05	-0.0844524
10	71089679	71089679	rs12355201	G	A	0.366635	-0.015613	0.001947	1.11e-15	563003	-0.0156179	0.00194667	1.03271e-15	HXK1	-4.9e-06	0.0313446
10	71106964	71106964	rs113041162	A	G	0.148747	0.104648	0.002612	1e-300	562532	0.104631	0.00261159	1e-300	HXK1	-1.7e-05	0
10	71111231	71111231	rs61870056	A	G	0.370114	0.040114	0.001952	8.49e-94	563937	0.0400598	0.00195169	1.26964e-93	HXK1	-5.42e-05	-0.174773
10	71145819	71145819	rs144194132	A	G	0.015278	0.104535	0.007709	7.69e-42	563943	0.104634	0.00770779	5.63174e-42	HXK1	9.9e-05	0.135284
10	71145894	71145894	rs2084274	A	G	0.495377	-0.016795	0.001852	1.3e-19	561277	-0.0167728	0.00185168	1.32676e-19	HXK1	2.22e-05	-0.00884902
10	71215079	71215079	rs117006591	C	T	0.012187	0.051372	0.008814	5.74e-09	560269	0.0514854	0.00881258	5.14989e-09	TSN15	0.0001134	0.0471139
10	71256003	71256003	rs12416663	A	T	0.088407	0.025086	0.003322	4.48e-14	560784	0.0251131	0.00332143	4.00221e-14	TSN15	2.71e-05	0.0489781
10	71262642	71262642	rs186260626	C	T	0.006189	0.089816	0.012414	4.85e-13	557078	0.0897076	0.012412	4.92108e-13	TSN15	-0.0001084	-0.00631869
11	13333851	13333851	rs10741616	A	G	0.384443	0.015184	0.00192	2.76e-15	546009	0.0155438	0.00191967	5.62677e-16	BMAL1	0.0003598	0.69065
12	111984054	111984054	rs56390488	C	T	0.047189	-0.027533	0.004362	2.84e-10	563006	-0.0274837	0.00436131	2.94388e-10	ATX2	4.93e-05	-0.0156018
13	110419354	110419354	rs12584136	A	C	0.053067	0.024469	0.004141	3.54e-09	559204	0.0244936	0.00414029	3.30013e-09	IRS2	2.46e-05	0.0304722
14	102987884	102987884	rs12894354	T	C	0.350484	-0.012646	0.001984	1.9e-10	563868	-0.0126534	0.00198368	1.78545e-10	ANKR9	-7.4e-06	0.0270059
15	58674308	58674308	rs2043082	A	G	0.355815	-0.017612	0.00193	7.68e-20	563005	-0.0176293	0.0019297	6.49505e-20	AL1A2	-1.73e-05	0.0727787
15	58684478	58684478	rs17821274	C	T	0.633142	0.012603	0.001922	5.72e-11	559204	0.0125512	0.00192166	6.51377e-11	AL1A2	-5.18e-05	-0.0564364
15	78060786	78060786	rs62007820	A	G	0.284921	-0.013056	0.002083	3.75e-10	563003	-0.0127307	0.00208266	9.79581e-10	LIGO1	0.0003253	-0.417009
16	10622895	10622895	rs6944	T	C	0.542384	-0.011215	0.001852	1.45e-09	562861	-0.0112101	0.00185168	1.41298e-09	EMP2	4.9e-06	0.011232
16	28531287	28531287	rs4787458	G	A	0.36242	-0.010936	0.001875	5.59e-09	563941	-0.0115398	0.0018747	7.48292e-10	IL27A	-0.0006038	0.873341
16	28964716	28964716	rs62037423	G	A	0.359029	0.012785	0.001927	3.39e-11	563943	0.013199	0.0019267	7.35502e-12	NF2IP	0.000414	0.663616
16	67818387	67818387	rs56076526	T	C	0.102236	0.035412	0.003093	2.62e-30	563939	0.0354613	0.00309251	1.93662e-30	RBP10	4.93e-05	0.131257
16	89236329	89236329	rs72819350	T	C	0.038844	0.036552	0.004803	2.87e-14	563942	0.0371385	0.00480225	1.04578e-14	CAD15	0.0005865	0.438442
17	16866777	16866777	rs73292853	G	C	0.104817	-0.017529	0.003032	7.6e-09	563939	-0.0174748	0.0030315	8.19515e-09	TR13B	5.42e-05	-0.0327433
17	16971521	16971521	rs4985717	G	A	0.263884	0.014034	0.002088	1.85e-11	563939	0.013965	0.00208768	2.24323e-11	MPRIP	-6.9e-05	-0.0837021
17	18123434	18123434	rs36058389	T	G	0.192975	-0.014494	0.00233	5.06e-10	563943	-0.0144472	0.00232963	5.59335e-10	L2GL1	4.68e-05	-0.0435215
17	21104746	21104746	rs1109514	A	G	0.484848	0.011178	0.001862	2e-09	563944	0.0113308	0.00186168	1.15531e-09	TMM11	0.0001528	0.238331
17	28464474	28464474	rs4470197	T	C	0.552331	0.010639	0.001851	9.26e-09	562359	0.0104098	0.00185068	1.85665e-08	NSRP1	-0.0002292	-0.302119
17	29090138	29090138	rs73269908	G	T	0.117071	0.021753	0.00299	3.57e-13	523382	0.0216544	0.0029895	4.37294e-13	CRLF3	-9.86e-05	-0.0881053
17	47490102	47490102	rs7502499	A	G	0.331739	0.012925	0.001976	6.36e-11	561272	0.0127993	0.00197565	9.26214e-11	PHB	-0.0001257	-0.163254
17	80190014	80190014	rs3176828	A	C	0.296788	0.011801	0.002147	3.99e-08	509033	0.012008	0.00214665	2.22094e-08	MOT4	0.000207	0.254436
18	55322502	55322502	rs12968116	T	C	0.122106	-0.022067	0.002813	4.56e-15	562360	-0.0219167	0.00281252	6.56731e-15	AT8B1	0.0001503	-0.158423
19	2536679	2536679	rs34181610	T	C	0.378878	0.012297	0.002019	1.17e-09	510117	0.0122034	0.00201867	1.49183e-09	GBG7	-9.36e-05	-0.105533
19	41132022	41132022	rs2278243	G	C	0.174277	0.021801	0.002443	4.81e-19	563942	0.0217862	0.00244261	4.69553e-19	LTBP4	-1.48e-05	0.0104605
19	41309240	41309240	rs11666504	T	C	0.165681	-0.018521	0.002484	9.31e-14	562358	-0.0184742	0.00248357	1.01784e-13	EGLN2	4.68e-05	-0.0387298
20	18494175	18494175	rs6132070	C	T	0.111665	0.018784	0.002927	1.42e-10	563945	0.0189466	0.00292655	9.54113e-11	SC23B	0.0001626	0.172689
21	44137137	44137137	rs7283732	T	C	0.403016	0.013755	0.001888	3.33e-13	563932	0.0137279	0.00188771	3.53575e-13	PDE9A	-2.71e-05	-0.0260373
22	18154878	18154878	rs2535691	G	A	0.204814	0.01407	0.002277	6.64e-10	563943	0.0137817	0.0022766	1.4163e-09	B2L13	-0.0002883	-0.328987
22	37388535	37388535	rs143580760	A	T	0.013942	0.054896	0.00823	2.65e-11	563936	0.0548812	0.00822871	2.56707e-11	TEX33	-1.48e-05	0.0138082
22	37435787	37435787	rs117574975	C	T	0.007029	-0.071408	0.012222	5.28e-09	498119	-0.0713415	0.01222	5.28027e-09	THTM	6.65e-05	-2.22077e-05
22	37438320	37438320	rs143499983	A	G	0.021217	-0.046645	0.00653	9.51e-13	563938	-0.0468766	0.00652897	6.98156e-13	KCD17	-0.0002316	0.134228
22	37442255	37442255	rs117470369	G	A	0.031541	0.05397	0.005393	1.51e-23	563004	0.0537852	0.00539216	1.96686e-23	KCD17	-0.0001848	-0.114797
22	37446134	37446134	rs141452749	G	C	0.022975	0.051474	0.006351	5.55e-16	563933	0.0512818	0.00634999	6.69911e-16	KCD17	-0.0001922	-0.0817241
22	37455874	37455874	rs78029853	C	T	0.019659	0.065366	0.006849	1.46e-21	563003	0.0655188	0.00684793	1.0933e-21	KCD17	0.0001528	0.125614
22	37460875	37460875	rs113796781	T	G	0.027652	0.077045	0.005671	5.28e-42	563941	0.0767025	0.00567013	1.07689e-41	TMPS6	-0.0003425	-0.309537
22	37470604	37470604	rs2072860	G	A	0.461439	-0.095318	0.001887	1e-300	563945	-0.0953426	0.0018867	1e-300	TMPS6	-2.46e-05	0
22	37480155	37480155	rs2543521	T	C	0.210977	-0.056548	0.002309	2.08e-132	562855	-0.0565998	0.00230862	9.81365e-133	TMPS6	-5.18e-05	0.326233
22	37513013	37513013	rs144753637	T	C	0.02125	0.042568	0.006738	2.74e-10	563932	0.0423462	0.00673693	3.26417e-10	TMPS6	-0.0002218	-0.0760222
22	37513761	37513761	rs80210934	A	G	0.048599	0.049252	0.00452	1.29e-27	562086	0.0493087	0.00451929	1.02462e-27	IL2RB	5.67e-05	0.100027
22	37514178	37514178	rs117442245	A	G	0.015508	-0.048437	0.007855	7.2e-10	562089	-0.0486884	0.00785378	5.66953e-10	IL2RB	-0.0002514	0.103785
22	37520225	37520225	rs5750383	G	A	0.519889	-0.022381	0.001889	2.46e-32	563002	-0.0223588	0.0018887	2.47605e-32	IL2RB	2.22e-05	-0.0028243
Shared loci after adjustment
CHR	POS	POS	SNP	A1	A2	freq	b	se	p	N	bC	bC_se	bC_pval	NearestGene	dBeta	dP
1	1713348	1713348	rs10907195	T	C	0.440617	-0.011165	0.001884	3.19e-09	562858	-0.0108274	0.0018837	9.03341e-09	NADK	0.0003376	-0.452061
1	3104972	3104972	rs116525159	A	G	0.05521	0.025199	0.004223	2.49e-09	510120	0.0252828	0.00422231	2.12566e-09	PRD16	8.38e-05	0.0687055
1	3311261	3311261	rs6702992	C	T	0.369215	0.014175	0.00203	2.98e-12	492829	0.0141479	0.00202967	3.15705e-12	PRD16	-2.71e-05	-0.0250652
1	3332212	3332212	rs111652194	T	C	0.03323	0.037757	0.005714	4.03e-11	510122	0.0377669	0.00571307	3.82753e-11	PRD16	9.9e-06	0.0223864
1	3691528	3691528	rs1175550	G	A	0.232052	0.030902	0.002316	1.41e-40	508079	0.0308995	0.00231559	1.28185e-40	SMIM1	-2.5e-06	0.0413819
1	3743391	3743391	rs6688969	T	C	0.312501	0.020648	0.002014	1.25e-24	544431	0.0206283	0.00201365	1.25627e-24	CE104	-1.97e-05	-0.00217298
1	7836659	7836659	rs11121022	C	A	0.42938	0.010507	0.001854	1.5e-08	563004	0.0105637	0.00185371	1.20738e-08	VAMP3	5.67e-05	0.0942473
1	10357806	10357806	rs112682076	C	G	0.010255	-0.069581	0.009449	1.86e-13	561436	-0.0704164	0.00944751	9.09379e-14	KIF1B	-0.0008354	0.310768
1	10483167	10483167	rs12119893	A	G	0.140766	0.019946	0.002822	1.65e-12	561529	0.019983	0.00282155	1.41828e-12	6PGD	3.7e-05	0.065722
1	10737045	10737045	rs169538	T	C	0.452665	-0.010752	0.001933	2.74e-08	509033	-0.0110231	0.00193268	1.17364e-08	CASZ1	-0.0002711	0.368216
1	12657974	12657974	rs115997464	A	C	0.026751	-0.03847	0.005854	5.15e-11	562860	-0.0379747	0.00585307	8.69896e-11	DHRS3	0.0004953	-0.22766
1	12660420	12660420	rs55728759	C	T	0.355143	0.01526	0.001964	8.23e-15	562855	0.0152058	0.00196369	9.67261e-15	DHRS3	-5.42e-05	-0.0701438
1	12665665	12665665	rs183458742	C	T	0.00421	0.09358	0.01662	1.84e-08	499549	0.0930206	0.0166173	2.17052e-08	DHRS3	-0.0005594	-0.071746
1	15814186	15814186	rs6667862	C	T	0.469563	-0.014405	0.001849	7.04e-15	559202	-0.0145036	0.00184868	4.31729e-15	CEL2B	-9.86e-05	0.212361
1	16368977	16368977	rs2007471	T	C	0.366123	0.021546	0.002007	7.65e-27	505374	0.021647	0.00200665	3.9377e-27	CLCKB	0.000101	0.288419
1	16504381	16504381	rs7538833	T	C	0.375356	-0.011283	0.001914	3.82e-09	562858	-0.0113914	0.0019137	2.63981e-09	ARHGJ	-0.0001084	0.160491
1	16521721	16521721	rs114647087	T	C	0.0267	0.035008	0.006044	7.12e-09	508758	0.0350943	0.00604301	6.34471e-09	ARHGJ	8.63e-05	0.0500682
1	17398849	17398849	rs3818042	A	G	0.57869	0.015638	0.001861	4.52e-17	563005	0.0158056	0.00186068	1.98758e-17	PADI2	0.0001676	0.356814
1	20736532	20736532	rs10916790	C	T	0.239778	0.01501	0.002171	4.92e-12	562362	0.0150026	0.00217063	4.79069e-12	VW5B1	-7.4e-06	0.011567
1	20757925	20757925	rs56383986	C	G	0.114396	-0.021956	0.00288	2.6e-14	563944	-0.0219708	0.00287955	2.34875e-14	CK2N1	-1.48e-05	0.0441366
1	22007443	22007443	rs72660363	T	C	0.160206	-0.015338	0.002533	1.45e-09	563005	-0.0153676	0.0025326	1.29589e-09	UBP48	-2.96e-05	0.0487999
1	22702231	22702231	rs12568930	C	T	0.175758	0.023386	0.002435	8.09e-22	547594	0.0235486	0.00243458	3.94329e-22	ZBT40	0.0001626	0.31209
1	25044111	25044111	rs4601530	T	C	0.256174	0.017885	0.002134	5.58e-17	559203	0.0179023	0.00213362	4.83905e-17	CLIC4	1.73e-05	0.0618741
1	26146514	26146514	rs1127818	C	G	0.525537	0.013071	0.001849	1.62e-12	563943	0.0129502	0.00184871	2.46938e-12	MFR1L	-0.0001208	-0.183073
1	28538204	28538204	rs490633	A	G	0.291795	0.012064	0.002015	2.18e-09	562360	0.0119161	0.00201466	3.32444e-09	DNJC8	-0.0001479	-0.183262
1	29486128	29486128	rs113292219	T	C	0.051581	0.031421	0.004188	6.49e-14	563940	0.0314284	0.00418734	6.11577e-14	SRSF4	7.4e-06	0.0257936
1	31572571	31572571	rs6687993	C	T	0.139806	0.021269	0.002691	2.82e-15	563945	0.0212863	0.00269054	2.54277e-15	PUM1	1.73e-05	0.044942
1	33830413	33830413	rs4653102	T	C	0.453463	0.01161	0.001842	3e-10	563002	0.0118269	0.00184171	1.34784e-10	PHC2	0.0002169	0.347483
1	39302880	39302880	rs7541734	T	C	0.729196	-0.012991	0.002066	3.29e-10	563945	-0.013097	0.00206565	2.29207e-10	RRAGC	-0.000106	0.156968
1	40038936	40038936	rs16826349	A	G	0.344914	-0.012054	0.001931	4.47e-10	563935	-0.0121723	0.0019307	2.88927e-10	PABP4	-0.0001183	0.189519
1	40418589	40418589	rs3131704	A	G	0.403124	0.011443	0.001885	1.31e-09	562357	0.0114134	0.00188467	1.3962e-09	MFS2A	-2.96e-05	-0.0276763
1	40418630	40418630	rs7515857	T	G	0.257328	-0.01903	0.002113	2.28e-19	563001	-0.0191606	0.00211264	1.19569e-19	MFS2A	-0.0001306	0.280316
1	43761651	43761651	rs4660253	C	T	0.382507	0.018513	0.001945	1.89e-21	563944	0.018407	0.00194469	2.92817e-21	TIE1	-0.000106	-0.190134
1	45973928	45973928	rs2275276	A	G	0.43305	-0.019133	0.001859	8.24e-25	559204	-0.0192907	0.00185868	3.09909e-25	MMAC	-0.0001577	0.424693
1	46462457	46462457	rs115858566	A	G	0.015791	0.045366	0.00744	1.11e-09	563944	0.0455385	0.00743883	9.25667e-10	MAST2	0.0001725	0.0788682
1	46497500	46497500	rs9429088	T	A	0.563654	0.024629	0.00185	2.09e-40	563937	0.0248902	0.00184968	2.82028e-41	MAST2	0.0002612	0.869854
1	46641837	46641837	rs12752892	A	G	0.121408	-0.017135	0.002932	5.25e-09	563940	-0.0172237	0.00293153	4.22017e-09	P55G	-8.87e-05	0.0948294
1	47704243	47704243	rs34948655	G	C	0.15107	-0.014281	0.002567	2.71e-08	562937	-0.0145669	0.0025666	1.38254e-08	TAL1	-0.0002859	0.292292
1	47938129	47938129	rs10789509	C	T	0.302282	-0.011512	0.002016	1.16e-08	559196	-0.0115293	0.00201566	1.06623e-08	FOXD2	-1.73e-05	0.0366071
1	47954771	47954771	rs115405539	T	A	0.066162	0.023417	0.003768	5.29e-10	563945	0.0235279	0.00376741	4.23494e-10	FOXD2	0.0001109	0.0966084
1	48030350	48030350	rs11583750	A	G	0.095109	-0.030257	0.003158	1.03e-21	563001	-0.0303063	0.00315747	8.12833e-22	FOXD2	-4.93e-05	0.102836
1	48143920	48143920	rs7514785	T	C	0.615599	0.01271	0.001897	2.17e-11	563936	0.0127223	0.00189669	1.97805e-11	TIKI2	1.23e-05	0.0402225
1	51478336	51478336	rs35311109	A	T	0.34408	0.011484	0.001972	5.94e-09	561852	0.0116023	0.00197168	3.99368e-09	CDN2C	0.0001183	0.172413
1	53304922	53304922	rs545719	T	C	0.362265	-0.016817	0.001905	1.13e-18	563943	-0.0168269	0.00190471	1.00673e-18	ZY11A	-9.9e-06	0.0501654
1	56924475	56924475	rs77770952	C	G	0.039213	-0.030002	0.004721	2.15e-10	563943	-0.0299724	0.00472025	2.15651e-10	LPP3	2.96e-05	-0.00131302
1	59656909	59656909	rs34370185	T	G	0.286141	0.012333	0.002035	1.4e-09	563939	0.0123552	0.00203468	1.26094e-09	FGGY	2.22e-05	0.0454336
1	61911157	61911157	rs2261980	A	G	0.233044	-0.014852	0.0022	1.52e-11	563945	-0.0146869	0.00219964	2.4398e-11	NFIA	0.0001651	-0.205511
1	66077590	66077590	rs6690625	G	T	0.196688	0.018081	0.002303	4.39e-15	563946	0.017943	0.0023026	6.57048e-15	LEPR	-0.000138	-0.175133
1	68720448	68720448	rs4655791	A	T	0.09332	0.018363	0.003149	5.67e-09	563944	0.0181166	0.00314846	8.71024e-09	WLS	-0.0002464	-0.186447
1	79452106	79452106	rs12129889	T	C	0.122579	0.017092	0.002828	1.54e-09	561492	0.0172226	0.00282755	1.1221e-09	ELTD1	0.0001306	0.137489
1	88641063	88641063	rs6428637	A	G	0.57848	-0.01311	0.00186	1.87e-12	562361	-0.0131248	0.00185968	1.69463e-12	PKN2	-1.48e-05	0.0427667
1	89295330	89295330	rs786913	A	G	0.379708	0.011961	0.001885	2.28e-10	563945	0.0118057	0.00188471	3.75344e-10	PKN2	-0.0001553	-0.216495
1	94514082	94514082	rs17392417	T	C	0.012545	0.046003	0.008342	3.57e-08	563301	0.0461287	0.00834069	3.19207e-08	ABCA4	0.0001257	0.0485958
1	101656407	101656407	rs35526088	T	G	0.384258	0.0105	0.001897	3.17e-08	563002	0.0105789	0.00189671	2.44025e-08	S1PR1	7.89e-05	0.113625
1	110470764	110470764	rs333947	A	G	0.150329	0.015569	0.002606	2.38e-09	558756	0.0155197	0.00260555	2.57827e-09	CSF1	-4.93e-05	-0.0347514
1	120257576	120257576	rs477992	A	G	0.319769	-0.014601	0.001971	1.35e-13	559848	-0.0146306	0.00197066	1.13467e-13	SERA	-2.96e-05	0.0754642
1	120272726	120272726	rs3828090	A	G	0.275901	0.011611	0.002078	2.38e-08	559203	0.0116184	0.00207764	2.24334e-08	SERA	7.4e-06	0.0256819
1	147287992	147287992	rs1086605	T	A	0.153875	0.025848	0.002535	2.21e-24	563944	0.0258258	0.00253456	2.20988e-24	CXA5	-2.22e-05	2.35822e-05
1	151497202	151497202	rs12038198	A	G	0.03209	-0.028921	0.005224	3.17e-08	560145	-0.0290122	0.00522309	2.78255e-08	CING	-9.12e-05	0.0566163
1	151762108	151762108	rs868868	T	C	0.341071	0.011241	0.001951	8.53e-09	560785	0.0112755	0.00195067	7.45523e-09	TDRKH	3.45e-05	0.058488
1	151982348	151982348	rs6587643	G	A	0.304106	-0.012408	0.002006	6.41e-10	563000	-0.0124869	0.00200569	4.79352e-10	S10AA	-7.89e-05	0.126203
1	154524973	154524973	rs12144146	G	A	0.311041	0.012244	0.002003	1.01e-09	559844	0.0122366	0.00200266	9.95249e-10	UB2Q1	-7.4e-06	0.00638962
1	154961448	154961448	rs2089247	G	T	0.029583	-0.067763	0.005468	3.14e-35	562860	-0.0678665	0.00546712	2.20567e-35	FAD1	-0.0001035	0.153389
1	155029253	155029253	rs3765087	C	A	0.133303	0.025272	0.002769	7.43e-20	562358	0.0253583	0.00276853	5.21559e-20	ADA15	8.63e-05	0.153685
1	155093567	155093567	rs80204403	G	C	0.030905	0.03711	0.005443	9.6e-12	563936	0.037386	0.00544213	6.43176e-12	EFNA1	0.000276	0.173941
1	155178782	155178782	rs760077	A	T	0.398492	-0.030901	0.001906	4.76e-59	562851	-0.0311573	0.00190569	4.37771e-60	MTX1	-0.0002563	1.03636
1	155202147	155202147	rs140342156	A	T	0.006356	0.065193	0.01176	3.03e-08	560983	0.0649096	0.0117581	3.38224e-08	GLCM	-0.0002834	-0.0477618
1	155261709	155261709	rs116100695	A	G	0.002739	-0.17145	0.018988	1.83e-19	486353	-0.171154	0.0189848	1.96291e-19	KPYR	0.000296	-0.0304493
1	155301642	155301642	rs149681784	T	C	0.034763	0.031261	0.005258	2.84e-09	563882	0.0311624	0.00525715	3.0735e-09	RUSC1	-9.86e-05	-0.0343149
1	155347819	155347819	rs138898231	C	A	0.014964	-0.048524	0.008521	1.27e-08	505979	-0.0486768	0.00851956	1.10656e-08	ASH1L	-0.0001528	0.0598288
1	155509562	155509562	rs113129002	C	T	0.067924	-0.023706	0.00374	2.41e-10	563939	-0.0237035	0.00373942	2.31517e-10	ASH1L	2.5e-06	0.0174342
1	155747278	155747278	rs6697355	A	G	0.026793	0.035183	0.005775	1.14e-09	563934	0.0353851	0.00577407	8.88366e-10	GON4L	0.0002021	0.108313
1	155824181	155824181	rs55785064	C	T	0.148417	-0.024841	0.002697	3.44e-20	561447	-0.0248361	0.00269656	3.25309e-20	GON4L	4.9e-06	0.0242624
1	156013676	156013676	rs34673835	T	C	0.203975	0.015702	0.002272	5.02e-12	563943	0.0157661	0.00227164	3.90976e-12	UBQL4	6.41e-05	0.108554
1	156883546	156883546	rs12137505	G	A	0.404754	-0.011047	0.001924	9.69e-09	559199	-0.0110445	0.00192367	9.39085e-09	PEAR1	2.5e-06	0.0136189
1	158586966	158586966	rs2022003	T	A	0.279992	-0.016847	0.00205	2.2e-16	560785	-0.0169086	0.00204965	1.59044e-16	SPTA1	-6.16e-05	0.140905
1	161515326	161515326	rs55971447	T	C	0.118261	0.031085	0.002863	2.01e-27	562858	0.0310308	0.00286256	2.21906e-27	FCG3A	-5.42e-05	-0.042973
1	161644871	161644871	rs72480273	C	A	0.183725	-0.021829	0.002415	1.67e-19	563943	-0.0219522	0.00241462	9.77986e-20	FCG2B	-0.0001232	0.232384
1	161683136	161683136	rs11746	A	G	0.487409	-0.011587	0.00184	3.12e-10	562358	-0.0116289	0.00183969	2.59653e-10	FCRLA	-4.19e-05	0.0797612
1	161808253	161808253	rs35621393	A	G	0.028877	0.030829	0.00552	2.39e-08	563945	0.0308512	0.00551913	2.27252e-08	ATF6A	2.22e-05	0.0218902
1	163739717	163739717	rs4442348	A	G	0.506143	0.011238	0.00185	1.29e-09	563945	0.0112626	0.00184968	1.13646e-09	NUF2	2.46e-05	0.0550356
1	171899255	171899255	rs79252847	T	C	0.101474	0.018439	0.003122	3.59e-09	563001	0.0183626	0.00312152	4.03918e-09	DYN3	-7.64e-05	-0.0511988
1	172157871	172157871	rs56138708	T	C	0.3133	-0.020244	0.001977	1.43e-24	563946	-0.0201232	0.0019767	2.42991e-24	DYN3	0.0001208	-0.230254
1	172396020	172396020	rs4916186	G	A	0.498648	-0.012456	0.001838	1.26e-11	563940	-0.0125102	0.00183771	9.93111e-12	CA105	-5.42e-05	0.103373
1	173813197	173813197	rs3791020	A	G	0.239323	-0.01513	0.002158	2.44e-12	559201	-0.0152015	0.00215763	1.84874e-12	SYDM	-7.15e-05	0.120514
1	174447588	174447588	rs10218528	A	T	0.393528	-0.011214	0.001893	3.21e-09	563935	-0.0113643	0.00189269	1.92146e-09	RBG10	-0.0001503	0.222874
1	175124199	175124199	rs6666417	T	A	0.575802	0.010617	0.001866	1.32e-08	563945	0.010654	0.0018657	1.1269e-08	TENN	3.7e-05	0.0686886
1	198867678	198867678	rs60639710	G	T	0.361171	-0.012653	0.001911	3.67e-11	563945	-0.0127048	0.0019107	2.94588e-11	PTPRC	-5.18e-05	0.095451
1	199010721	199010721	rs1434282	C	T	0.277163	0.023279	0.002058	1.27e-29	563943	0.0232667	0.00205765	1.20588e-29	PTPRC	-1.23e-05	0.0224996
1	199118810	199118810	rs16844291	G	A	0.130989	0.020497	0.002726	5.77e-14	563944	0.0205069	0.00272553	5.31317e-14	PTPRC	9.9e-06	0.0358221
1	200033769	200033769	rs2821388	G	A	0.267594	0.014734	0.002076	1.34e-12	563004	0.0147513	0.00207564	1.18735e-12	NR5A2	1.73e-05	0.052526
1	201109377	201109377	rs10920128	T	C	0.306902	0.011377	0.002014	1.65e-08	563002	0.0113326	0.00201366	1.82433e-08	TMEM9	-4.44e-05	-0.0436195
1	203655743	203655743	rs7554335	A	G	0.100089	0.040343	0.00307	2.12e-39	559375	0.0402986	0.00306951	2.25483e-39	AT2B4	-4.44e-05	-0.0267779
1	203882550	203882550	rs34439010	C	G	0.068504	0.022973	0.003637	2.77e-10	563917	0.0229557	0.00363644	2.74197e-10	RUXE	-1.73e-05	0.00441707
1	204254795	204254795	rs4617466	C	T	0.452005	-0.011518	0.001867	7e-10	563931	-0.0115402	0.0018667	6.32459e-10	PKHA6	-2.22e-05	0.0440657
1	211171616	211171616	rs4642960	A	G	0.30976	-0.012804	0.001985	1.15e-10	562536	-0.0128755	0.0019847	8.7346e-11	KCNH1	-7.15e-05	0.119455
1	212402580	212402580	rs1472226	A	G	0.403224	-0.013492	0.001883	8.19e-13	559202	-0.0134945	0.00188267	7.6262e-13	2A5A	-2.5e-06	0.0309757
1	212428931	212428931	rs11119892	T	G	0.581979	-0.011636	0.00186	4.1e-10	563943	-0.0116754	0.0018597	3.42712e-10	2A5A	-3.94e-05	0.0778545
1	213037624	213037624	rs963327	C	A	0.251231	-0.018333	0.002118	5.17e-18	561277	-0.0183897	0.00211763	3.81837e-18	FLVC1	-5.67e-05	0.131613
1	213952574	213952574	rs2359936	T	C	0.36403	0.013652	0.001919	1.16e-12	561275	0.0136964	0.00191867	9.43899e-13	PROX1	4.44e-05	0.0895325
1	213974734	213974734	rs17709142	C	T	0.094003	0.029705	0.003277	1.32e-19	558120	0.0298455	0.00327645	8.30709e-20	PROX1	0.0001405	0.201125
1	214141371	214141371	rs75767436	G	A	0.034131	0.02937	0.005088	8.01e-09	563944	0.0297347	0.00508721	5.06573e-09	PROX1	0.0003647	0.19899
1	214180721	214180721	rs3767844	G	A	0.28638	0.034623	0.002051	7.28e-64	558763	0.0347561	0.00205064	1.96152e-64	PROX1	0.0001331	0.569539
1	217016310	217016310	rs11117693	T	A	0.199711	0.017847	0.002297	8.27e-15	563943	0.0179259	0.00229662	5.93419e-15	ERR3	7.89e-05	0.144144
1	217356247	217356247	rs11117792	A	G	0.393123	0.012293	0.001885	7.27e-11	562997	0.0121772	0.0018847	1.03958e-10	ERR3	-0.0001158	-0.155324
1	217436181	217436181	rs1466	T	C	0.148922	0.027015	0.002573	9.32e-26	563944	0.0270594	0.00257256	7.10339e-26	ERR3	4.44e-05	0.11795
1	227783924	227783924	rs10916172	A	G	0.167965	-0.014398	0.002488	7.36e-09	563941	-0.01443	0.00248757	6.5981e-09	ZN678	-3.2e-05	0.0474589
1	229565204	229565204	rs7521083	T	C	0.166279	0.014948	0.002526	3.36e-09	560785	0.0149381	0.00252557	3.32379e-09	ACTS	-9.9e-06	0.0047057
1	230281698	230281698	rs6541295	A	G	0.162152	0.014657	0.002484	3.72e-09	563945	0.0144475	0.00248362	5.98638e-09	GALT2	-0.0002095	-0.206621
1	230296153	230296153	rs10864726	T	C	0.604837	-0.015565	0.001871	9.41e-17	563928	-0.015326	0.0018707	2.55578e-16	GALT2	0.000239	-0.433934
1	231114595	231114595	rs11122174	C	T	0.599716	0.014088	0.001866	4.53e-14	563937	0.0140781	0.0018657	4.49657e-14	TTC13	-9.9e-06	0.00321684
1	231168537	231168537	rs12067337	G	C	0.121533	-0.017114	0.002837	1.65e-09	563941	-0.0172964	0.00283655	1.07621e-09	FA89A	-0.0001824	0.185587
1	231269289	231269289	rs55897627	T	C	0.035701	0.035395	0.005007	1.63e-12	563944	0.0350525	0.00500623	2.52765e-12	TRI67	-0.0003425	-0.190529
1	231485958	231485958	rs2250734	G	A	0.36917	-0.027553	0.001897	9.75e-48	562858	-0.0275776	0.00189671	6.78537e-48	SPRTN	-2.46e-05	0.157431
1	231530430	231530430	rs559286	T	C	0.016537	-0.040224	0.007226	2.67e-08	563942	-0.0400761	0.00722489	2.90684e-08	EGLN1	0.0001479	-0.0369099
1	231562228	231562228	rs61835223	G	A	0.02027	0.115511	0.00664	1e-67	563945	0.115343	0.00663898	1.30607e-67	EGLN1	-0.000168	-0.115966
1	231857439	231857439	rs139339641	A	G	0.028657	0.034868	0.005752	1.38e-09	563934	0.0344417	0.00575111	2.11519e-09	DISC1	-0.0004263	-0.18547
1	233048254	233048254	rs73101498	T	C	0.057699	-0.023443	0.003959	3.27e-09	563005	-0.0235366	0.00395835	2.74649e-09	NTPCR	-9.36e-05	0.0757697
1	247602968	247602968	rs4925546	A	G	0.373422	0.011525	0.001902	1.41e-09	559205	0.0115398	0.00190167	1.2932e-09	NALP3	1.48e-05	0.0375534
1	248039451	248039451	rs3811444	T	C	0.336218	0.022497	0.001943	5.72e-31	561276	0.022396	0.00194267	9.48283e-31	OR2W3	-0.000101	-0.219542
2	408713	408713	rs62106252	A	G	0.048595	0.024695	0.004446	2.85e-08	546655	0.0267675	0.0044453	1.72782e-09	F150B	0.0020725	1.21735
2	12104544	12104544	rs972874	G	A	0.240169	0.01183	0.002162	4.57e-08	559846	0.0118744	0.00216163	3.94621e-08	LPIN1	4.44e-05	0.063736
2	12893977	12893977	rs2059427	T	C	0.371788	0.016322	0.001916	1.72e-17	559846	0.0161914	0.00191567	2.86123e-17	TRIB2	-0.0001306	-0.221024
2	20371380	20371380	rs907866	A	G	0.447747	0.010872	0.001865	5.76e-09	559840	0.0108646	0.00186468	5.65915e-09	SDC1	-7.4e-06	0.00767128
2	20819786	20819786	rs62125677	T	C	0.057173	-0.024626	0.004015	8.86e-10	559843	-0.0245471	0.00401436	9.66594e-10	H1BP3	7.89e-05	-0.0378104
2	21288226	21288226	rs563290	G	A	0.182124	0.016813	0.002378	1.6e-12	559847	0.0166553	0.00237758	2.46763e-12	APOB	-0.0001577	-0.18816
2	24231123	24231123	rs72781671	G	A	0.13458	0.024048	0.002701	5.82e-19	559845	0.0240899	0.00270058	4.65127e-19	MFS2B	4.19e-05	0.0973514
2	24918159	24918159	rs11890632	T	G	0.108901	-0.017918	0.002989	2.1e-09	559848	-0.0181496	0.0029885	1.25421e-09	NCOA1	-0.0002316	0.223849
2	25518862	25518862	rs7587636	A	G	0.531714	-0.014607	0.00187	5.99e-15	559698	-0.0146637	0.00186967	4.4018e-15	DNM3A	-5.67e-05	0.133797
2	25575523	25575523	rs77541036	G	A	0.037133	0.038019	0.004868	6.02e-15	563942	0.038465	0.00486723	2.72574e-15	DNM3A	0.000446	0.344112
2	26076426	26076426	rs9309434	T	C	0.299793	0.017222	0.002001	7.81e-18	560785	0.0171949	0.00200066	8.35567e-18	ASXL2	-2.71e-05	-0.0293302
2	26291493	26291493	rs4233709	T	C	0.208199	0.013471	0.002261	2.63e-09	560788	0.0134414	0.00226061	2.7491e-09	RAB10	-2.96e-05	-0.0192348
2	26928097	26928097	rs1731247	A	G	0.258375	-0.012037	0.002109	1.18e-08	563940	-0.0121183	0.00210867	9.08957e-09	KCNK3	-8.13e-05	0.113339
2	27293982	27293982	rs12373799	A	G	0.094756	0.021073	0.003207	5.16e-11	562360	0.020967	0.00320649	6.19612e-11	OST4	-0.000106	-0.0794701
2	27730940	27730940	rs1260326	T	C	0.398784	-0.016203	0.00187	4.84e-18	562359	-0.0159393	0.00186968	1.52586e-17	GCKR	0.0002637	-0.498669
2	27989909	27989909	rs4665390	T	C	0.256351	0.019999	0.002094	1.35e-21	563911	0.0197427	0.00209368	4.11332e-21	RM33	-0.0002563	-0.483859
2	28503941	28503941	rs12468596	A	G	0.213054	0.013948	0.002253	6.2e-10	558761	0.014017	0.00225261	4.89085e-10	BRE	6.9e-05	0.103007
2	28997140	28997140	rs6547875	G	T	0.386548	0.012251	0.001882	7.73e-11	563943	0.0119947	0.0018817	1.83669e-10	PP1B	-0.0002563	-0.375856
2	30491392	30491392	rs17009315	G	A	0.23023	-0.014124	0.002176	8.91e-11	563938	-0.0142152	0.00217563	6.41075e-11	LBH	-9.12e-05	0.142969
2	39751575	39751575	rs56337010	C	T	0.503743	0.013597	0.00183	1.13e-13	563897	0.0136019	0.00182971	1.05434e-13	M4K3	4.9e-06	0.0300978
2	42282829	42282829	rs11902166	A	C	0.219353	0.01608	0.002236	6.66e-13	560785	0.0160603	0.00223565	6.78346e-13	PKDCC	-1.97e-05	-0.00797704
2	43361055	43361055	rs76406558	T	C	0.141609	-0.016223	0.002736	3.1e-09	563943	-0.016191	0.00273557	3.24518e-09	THADA	3.2e-05	-0.0198771
2	43423895	43423895	rs4952979	C	T	0.520474	0.017944	0.001887	2.07e-21	562998	0.0178011	0.0018867	3.90809e-21	THADA	-0.0001429	-0.275994
2	44014301	44014301	rs3765000	G	A	0.074396	0.028027	0.003508	1.43e-15	563944	0.0282784	0.0035074	7.47527e-16	DC2L1	0.0002514	0.281709
2	45886816	45886816	rs526888	A	T	0.289079	0.012371	0.002029	1.12e-09	563940	0.0122897	0.00202868	1.37857e-09	KPCE	-8.13e-05	-0.0902108
2	45971126	45971126	rs1476333	G	A	0.406741	-0.010944	0.001899	8.49e-09	560313	-0.0107961	0.00189871	1.30015e-08	KPCE	0.0001479	-0.185086
2	46002463	46002463	rs6738524	C	T	0.260763	0.015181	0.0021	5.1e-13	563944	0.0152377	0.00209964	3.94915e-13	KPCE	5.67e-05	0.111067
2	46179662	46179662	rs12471357	T	C	0.42123	0.014276	0.001879	3.16e-14	559701	0.014239	0.00187868	3.47435e-14	KPCE	-3.7e-05	-0.0411865
2	46193347	46193347	rs6706140	C	T	0.430906	-0.016766	0.001882	5.41e-19	558119	-0.0167931	0.00188167	4.47493e-19	KPCE	-2.71e-05	0.082411
2	46227831	46227831	rs75357782	A	G	0.013577	-0.049221	0.008307	3.21e-09	527655	-0.0495069	0.00830568	2.5131e-09	KPCE	-0.0002859	0.106295
2	46293826	46293826	rs114948639	T	C	0.011824	-0.119079	0.008749	3.81e-42	563301	-0.119242	0.00874762	2.60798e-42	KPCE	-0.000163	0.164621
2	46299113	46299113	rs7598174	T	C	0.192559	-0.042703	0.002365	8.29e-73	559843	-0.0427572	0.0023646	4.39807e-73	KPCE	-5.42e-05	0.275292
2	46325187	46325187	rs58166457	C	T	0.020574	-0.089575	0.006547	1.45e-42	563946	-0.0897672	0.00654598	8.44763e-43	KPCE	-0.0001922	0.234633
2	46339378	46339378	rs12615702	A	G	0.24965	-0.015859	0.002132	1.06e-13	563941	-0.0159058	0.00213164	8.53589e-14	KPCE	-4.68e-05	0.0940571
2	46339601	46339601	rs114176190	G	A	0.065047	0.039523	0.003826	5.45e-25	563765	0.0395674	0.00382541	4.48774e-25	KPCE	4.44e-05	0.0843688
2	46350501	46350501	rs17737489	C	T	0.037033	0.033158	0.004885	1.18e-11	562987	0.0329436	0.00488416	1.53043e-11	KPCE	-0.0002144	-0.112931
2	46356950	46356950	rs75318255	A	G	0.027758	0.059908	0.005772	3.3e-25	563945	0.0601988	0.0057711	1.78845e-25	KPCE	0.0002908	0.266037
2	46360907	46360907	rs10168349	C	G	0.335571	-0.072482	0.001947	2.53e-303	563297	-0.0725066	0.00194667	1.20454e-303	KPCE	-2.46e-05	0.322299
2	46374721	46374721	rs148158767	T	C	0.023432	-0.088583	0.00614	3.92e-47	562582	-0.0884031	0.00613904	5.16383e-47	KPCE	0.0001799	-0.119686
2	46377293	46377293	rs146739907	G	A	0.024999	0.035942	0.00625	9.11e-09	563945	0.0359124	0.00624902	9.09025e-09	KPCE	-2.96e-05	0.00094255
2	46383523	46383523	rs115257641	T	C	0.020218	0.063873	0.00661	4.59e-22	563945	0.0638976	0.00660896	4.10988e-22	KPCE	2.46e-05	0.0479835
2	46403889	46403889	rs281471	A	T	0.062999	0.026068	0.003805	7.57e-12	560788	0.0260162	0.00380435	7.99943e-12	KPCE	-5.18e-05	-0.0239632
2	46406164	46406164	rs149395193	A	C	0.009139	-0.090695	0.010063	2.13e-19	562390	-0.0905841	0.0100615	2.19496e-19	KPCE	0.0001109	-0.013047
2	46429837	46429837	rs4953323	T	C	0.173271	-0.014094	0.002443	8.19e-09	560781	-0.0141581	0.00244258	6.77667e-09	KPCE	-6.41e-05	0.0822676
2	46438085	46438085	rs149607617	A	T	0.036224	0.044257	0.005019	1.24e-18	563946	0.0443876	0.00501823	9.13066e-19	KPCE	0.0001306	0.13292
2	46443932	46443932	rs72793686	A	C	0.021719	-0.051468	0.006432	1.29e-15	563946	-0.051574	0.00643098	1.06082e-15	KPCE	-0.000106	0.084948
2	46459998	46459998	rs73926235	T	C	0.018407	-0.042367	0.007302	6.73e-09	563945	-0.0422315	0.00730082	7.27346e-09	KPCE	0.0001355	-0.033726
2	46467257	46467257	rs76616743	A	G	0.03461	-0.057223	0.005082	2.22e-29	563946	-0.0572304	0.00508121	1.99512e-29	KPCE	-7.4e-06	0.046384
2	46487144	46487144	rs66830405	A	G	0.267072	-0.011663	0.002102	2.94e-08	563945	-0.0116457	0.00210167	3.00445e-08	EPAS1	1.73e-05	-0.00941765
2	46554533	46554533	rs11125071	C	G	0.549304	-0.01614	0.001861	4.44e-18	562857	-0.01614	0.00186068	4.16286e-18	EPAS1	0	0.0279912
2	46594081	46594081	rs146610421	A	T	0.007344	-0.069473	0.011155	4.88e-10	563035	-0.0695223	0.0111532	4.56482e-10	EPAS1	-4.93e-05	0.0289962
2	47030363	47030363	rs17773190	G	A	0.47677	0.020801	0.001862	6.08e-29	563003	0.020907	0.00186168	2.89938e-29	SOCS5	0.000106	0.321598
2	47052788	47052788	rs1867818	T	C	0.382906	-0.012654	0.001966	1.25e-10	561913	-0.0128758	0.00196569	5.74304e-11	SOCS5	-0.0002218	0.337768
2	54003013	54003013	rs2542582	G	C	0.327374	0.016324	0.00197	1.23e-16	560785	0.0164004	0.00196966	8.32631e-17	ASB3	7.64e-05	0.169453
2	54838613	54838613	rs10193877	C	A	0.207986	-0.012545	0.002274	3.53e-08	563940	-0.0126288	0.00227364	2.78491e-08	SPTB2	-8.38e-05	0.102964
2	60757419	60757419	rs2457660	C	T	0.366972	-0.012037	0.001923	3.95e-10	561226	-0.0118817	0.00192267	6.41803e-10	BC11A	0.0001553	-0.210805
2	62347842	62347842	rs13033531	G	A	0.344439	-0.01225	0.001941	2.87e-10	563939	-0.0122426	0.00194069	2.81999e-10	COMD1	7.4e-06	0.00763433
2	66750017	66750017	rs4544423	T	G	0.406091	-0.012437	0.001873	3.26e-11	563946	-0.0124592	0.00187268	2.86906e-11	MEIS1	-2.22e-05	0.055478
2	67220204	67220204	rs35925839	A	G	0.052514	0.028876	0.004217	7.81e-12	563004	0.0289647	0.00421634	6.43698e-12	ETAA1	8.87e-05	0.0839689
2	69100658	69100658	rs77301742	T	C	0.06726	-0.020825	0.003688	1.67e-08	563945	-0.0209088	0.00368742	1.42544e-08	BMP10	-8.38e-05	0.0687675
2	69813458	69813458	rs12987661	C	T	0.123421	0.020388	0.002801	3.53e-13	559203	0.020489	0.00280052	2.55186e-13	AAK1	0.000101	0.140918
2	70273707	70273707	rs13000817	A	G	0.243277	-0.013309	0.002146	5.78e-10	560787	-0.0133731	0.00214563	4.58495e-10	PCBP1	-6.41e-05	0.100593
2	73850820	73850820	rs6711001	G	C	0.22903	0.015238	0.002187	3.32e-12	563941	0.015169	0.00218665	4.0022e-12	ALMS1	-6.9e-05	-0.0811607
2	85447484	85447484	rs6547599	A	T	0.397686	0.011691	0.001907	9.03e-10	562857	0.0116811	0.00190671	8.99183e-10	TF7L1	-9.9e-06	0.00183966
2	100643443	100643443	rs11123804	G	T	0.355361	-0.01352	0.001933	2.74e-12	559844	-0.0134411	0.0019327	3.53552e-12	AFF3	7.89e-05	-0.110703
2	112120356	112120356	rs190262259	A	G	0.250575	-0.016423	0.002441	1.8e-11	554983	-0.0164748	0.00244061	1.47589e-11	B2L11	-5.18e-05	0.0862185
2	112272727	112272727	rs138058297	T	C	0.118568	-0.021468	0.002888	1.11e-13	556346	-0.021362	0.00288753	1.38229e-13	APC1	0.000106	-0.0952762
2	112484525	112484525	rs78658973	A	T	0.233651	0.013453	0.002215	1.3e-09	559847	0.0133815	0.00221465	1.51962e-09	APC1	-7.15e-05	-0.0677916
2	113841030	113841030	rs6734238	G	A	0.40292	-0.011579	0.001875	6.87e-10	559202	-0.0115667	0.00187468	6.83069e-10	IL1FA	1.23e-05	0.00249216
2	113972945	113972945	rs752590	G	A	0.210011	0.030573	0.00226	1.22e-41	559843	0.030334	0.00225961	4.3511e-41	PAX8	-0.000239	-0.552239
2	120848049	120848049	rs28930677	T	C	0.045953	0.042509	0.004433	9.5e-22	559201	0.0426741	0.00443229	6.09016e-22	E41L5	0.0001651	0.193095
2	121988884	121988884	rs11694902	A	G	0.140078	0.028537	0.002651	5.44e-27	559841	0.0284852	0.00265055	6.12771e-27	TF2L1	-5.18e-05	-0.0516993
2	122079345	122079345	rs2713226	G	T	0.248351	0.013836	0.002141	1.07e-10	559845	0.0137497	0.00214065	1.33462e-10	CLAP1	-8.63e-05	-0.0959739
2	127451514	127451514	rs111631066	A	G	0.016106	0.042261	0.00773	4.68e-08	559200	0.0424754	0.00772879	3.89078e-08	GLPC	0.0002144	0.0802092
2	135283436	135283436	rs592037	T	C	0.654952	0.013337	0.001974	1.48e-11	556261	0.0132803	0.00197368	1.71188e-11	TM163	-5.67e-05	-0.0632116
2	137074132	137074132	rs6708702	A	G	0.292062	-0.011933	0.002032	4.41e-09	558114	-0.011901	0.00203165	4.69054e-09	CXCR4	3.2e-05	-0.0267843
2	144352423	144352423	rs13415550	T	C	0.218631	0.013142	0.002252	5.49e-09	559202	0.013179	0.00225162	4.82457e-09	RHG15	3.7e-05	0.0561137
2	145223242	145223242	rs28610014	A	G	0.145942	-0.016707	0.002619	1.85e-10	559846	-0.0169707	0.00261859	9.1205e-11	ZEB2	-0.0002637	0.307153
2	145412271	145412271	rs74697736	A	G	0.287252	-0.01602	0.002053	6.25e-15	557907	-0.0160274	0.00205267	5.8077e-15	ZEB2	-7.4e-06	0.0318758
2	145695907	145695907	rs1371044	A	G	0.234155	0.026924	0.00218	5.4e-35	559846	0.026818	0.00217962	8.61892e-35	ZEB2	-0.000106	-0.203059
2	146045060	146045060	rs17409597	C	T	0.493713	-0.013081	0.001856	1.88e-12	558118	-0.013118	0.00185568	1.55959e-12	ZEB2	-3.7e-05	0.0811474
2	158481992	158481992	rs10164853	G	A	0.077107	0.019918	0.003506	1.38e-08	559847	0.0199303	0.0035054	1.30345e-08	ACV1C	1.23e-05	0.0247847
2	159353857	159353857	rs1117199	T	C	0.420077	0.011726	0.001864	3.27e-10	559847	0.0116718	0.00186368	3.78208e-10	PKP4	-5.42e-05	-0.063183
2	160957626	160957626	rs4076844	A	T	0.763322	0.014103	0.002167	7.86e-11	559846	0.0139921	0.00216664	1.06113e-10	ITB6	-0.0001109	-0.130346
2	165273155	165273155	rs142524111	T	C	0.011051	0.050537	0.009234	4.53e-08	558294	0.0508524	0.00923253	3.63006e-08	GRB14	0.0003154	0.0961844
2	165528876	165528876	rs13389219	T	C	0.392957	-0.017395	0.001883	2.67e-20	559845	-0.0176611	0.00188267	6.54015e-21	COBL1	-0.0002661	0.610924
2	176974104	176974104	rs863678	G	T	0.357371	-0.023868	0.00199	4.02e-33	558116	-0.0237768	0.00198968	6.48628e-33	HXD10	9.12e-05	-0.20777
2	176996023	176996023	rs4972804	T	C	0.591772	0.014498	0.002067	2.43e-12	559809	0.0144191	0.00206666	3.01464e-12	HXD8	-7.89e-05	-0.0936292
2	177005757	177005757	rs1348807	C	T	0.300433	-0.016887	0.002022	7.09e-17	559205	-0.0167712	0.00202166	1.07896e-16	HXD3	0.0001158	-0.182359
2	177011173	177011173	rs11692796	G	A	0.049355	0.025295	0.004377	7.73e-09	559846	0.0252679	0.00437633	7.75175e-09	HXD3	-2.71e-05	-0.00122026
2	177769748	177769748	rs1358453	A	G	0.449774	0.011916	0.001853	1.3e-10	559842	0.011879	0.00185271	1.43887e-10	ROA3	-3.7e-05	-0.0440782
2	181889062	181889062	rs4362519	C	G	0.338049	-0.012242	0.001954	3.86e-10	559846	-0.0120867	0.00195369	6.14659e-10	UB2E3	0.0001553	-0.202047
2	196679977	196679977	rs6744374	G	C	0.590531	0.010991	0.001873	4.53e-09	559841	0.0110674	0.00187268	3.42246e-09	DYH7	7.64e-05	0.12176
2	204081675	204081675	rs116219813	T	C	0.125617	0.018803	0.002781	1.42e-11	559844	0.0190889	0.00278057	6.64466e-12	NBEL1	0.0002859	0.329816
2	204497606	204497606	rs7370759	A	G	0.066514	-0.020347	0.003728	4.91e-08	559848	-0.0204185	0.00372742	4.30391e-08	CD28	-7.15e-05	0.0572183
2	208003579	208003579	rs768090	A	T	0.319564	0.019066	0.001986	8.55e-22	559846	0.0191325	0.00198566	5.6688e-22	KLF7	6.65e-05	0.178475
2	208031724	208031724	rs2269070	C	G	0.183549	0.014848	0.002394	5.74e-10	558756	0.0148677	0.00239363	5.25241e-10	KLF7	1.97e-05	0.0385533
2	208541632	208541632	rs12611665	T	C	0.435719	0.012349	0.001952	2.58e-10	558759	0.0122159	0.00195169	3.87079e-10	CCYL1	-0.0001331	-0.17618
2	208632817	208632817	rs35994626	A	G	0.074576	-0.025084	0.003565	2.06e-12	558118	-0.0251431	0.00356443	1.7396e-12	FZD5	-5.91e-05	0.0734178
2	219250003	219250003	rs3731865	C	G	0.277971	-0.012495	0.002073	1.72e-09	559848	-0.0127143	0.00207267	8.55456e-10	NRAM1	-0.0002193	0.303331
2	219336959	219336959	rs833083	T	A	0.430354	-0.021658	0.001877	9.17e-31	558759	-0.0219439	0.00187668	1.38502e-31	UBP37	-0.0002859	0.820913
2	219699999	219699999	rs78058190	A	G	0.051698	0.030812	0.00475	9.1e-11	550471	0.0311545	0.00474927	5.38582e-11	AAKG3	0.0003425	0.22779
2	227087284	227087284	rs2943636	A	G	0.488953	0.014695	0.001842	1.55e-15	559846	0.0148084	0.00184168	8.9331e-16	IRS1	0.0001134	0.23933
2	227184631	227184631	rs10933137	T	C	0.397802	0.010597	0.001902	2.6e-08	559202	0.0107424	0.00190167	1.61451e-08	IRS1	0.0001454	0.206933
2	234259470	234259470	rs4663540	A	G	0.375839	-0.013156	0.001911	6.06e-12	559204	-0.0131806	0.00191068	5.2585e-12	DGKD	-2.46e-05	0.0616107
2	239069196	239069196	rs13007705	T	C	0.44697	0.016649	0.001881	9.08e-19	559842	0.0166835	0.0018807	7.25504e-19	F132B	3.45e-05	0.097446
2	242189231	242189231	rs12475607	C	T	0.102117	-0.017432	0.003039	9.98e-09	559846	-0.0177179	0.00303853	5.50768e-09	VIGLN	-0.0002859	0.258162
2	242638453	242638453	rs4675894	G	T	0.452273	0.012377	0.001885	5.36e-11	558706	0.0124263	0.0018847	4.30283e-11	ING5	4.93e-05	0.0954106
3	4624521	4624521	rs73009417	G	C	0.110279	-0.016834	0.002982	1.69e-08	563944	-0.0169843	0.00298153	1.22289e-08	ITPR1	-0.0001503	0.140499
3	4755062	4755062	rs7634227	G	T	0.16845	-0.013475	0.002463	4.56e-08	563945	-0.0134947	0.00246258	4.25549e-08	ITPR1	-1.97e-05	0.0300153
3	12316326	12316326	rs62242116	A	G	0.091274	0.017614	0.003199	3.75e-08	563942	0.0174514	0.0031985	4.86674e-08	PPARG	-0.0001626	-0.113207
3	12379351	12379351	rs35240997	G	A	0.215613	-0.028625	0.002236	1.79e-37	563943	-0.0286595	0.00223565	1.27797e-37	PPARG	-3.45e-05	0.146332
3	12448184	12448184	rs142397996	A	G	0.007016	0.067214	0.011407	3.92e-09	554972	0.0677241	0.0114052	2.88494e-09	PPARG	0.0005101	0.133149
3	12635706	12635706	rs1532533	A	G	0.441472	0.014924	0.001859	1.04e-15	558116	0.0149067	0.00185868	1.05683e-15	RAF1	-1.73e-05	-0.00697179
3	13726840	13726840	rs6781368	G	A	0.4523	0.012195	0.001857	5.37e-11	560785	0.0122295	0.00185668	4.49543e-11	FBLN2	3.45e-05	0.077203
3	13895542	13895542	rs62234580	A	G	0.282931	0.012448	0.002058	1.5e-09	563933	0.0124653	0.00205767	1.37878e-09	WNT7A	1.73e-05	0.0365963
3	14934801	14934801	rs4234532	A	G	0.562242	-0.017315	0.001888	5.02e-20	546508	-0.0173323	0.0018877	4.24347e-20	FGD5	-1.73e-05	0.0729826
3	16928092	16928092	rs1992382	A	G	0.073235	0.020935	0.003544	3.59e-09	563945	0.0209547	0.00354345	3.34612e-09	PLCL2	1.97e-05	0.0305529
3	23164663	23164663	rs4263312	A	G	0.546292	0.010896	0.001861	4.92e-09	562981	0.0109108	0.0018607	4.52407e-09	UB2E2	1.48e-05	0.0364358
3	23396320	23396320	rs148462165	T	C	0.255213	0.015176	0.002125	9.52e-13	562536	0.0152376	0.00212467	7.40377e-13	UB2E2	6.16e-05	0.109184
3	25053043	25053043	rs4482636	C	T	0.346864	0.012709	0.001935	5.23e-11	563945	0.0127534	0.00193467	4.3392e-11	RARB	4.44e-05	0.081092
3	30199216	30199216	rs12635066	A	G	0.340726	0.013468	0.001999	1.68e-11	562778	0.0134434	0.00199869	1.74297e-11	RBMS3	-2.46e-05	-0.0159806
3	36312234	36312234	rs7647352	G	A	0.602971	-0.011581	0.001883	8.01e-10	562360	-0.0117067	0.00188267	5.03169e-10	STAC	-0.0001257	0.201919
3	37987856	37987856	rs9816588	A	C	0.098359	0.035841	0.003087	3.9e-31	563941	0.0359667	0.00308652	2.2194e-31	CTDSL	0.0001257	0.244829
3	41775915	41775915	rs4973891	C	T	0.043518	-0.025012	0.004573	4.63e-08	563945	-0.0252486	0.00457225	3.34904e-08	ULK4	-0.0002366	0.140661
3	41972209	41972209	rs1716990	C	T	0.163324	0.019566	0.00249	4.07e-15	563945	0.019428	0.0024896	6.01325e-15	ULK4	-0.000138	-0.169515
3	46979013	46979013	rs4683294	G	C	0.32561	0.012453	0.002069	1.82e-09	559702	0.0124284	0.00206864	1.87834e-09	CCD12	-2.46e-05	-0.0137028
3	47482222	47482222	rs7648696	T	C	0.414567	-0.011444	0.00199	9.14e-09	562851	-0.0115056	0.00198967	7.35182e-09	SCAP	-6.16e-05	0.0945513
3	49649989	49649989	rs9827708	G	C	0.301202	-0.012376	0.002007	7.17e-10	560777	-0.0119792	0.00200666	2.37633e-09	BSN	0.0003968	-0.520388
3	52077132	52077132	rs111490052	G	A	0.102802	-0.021296	0.003169	1.89e-11	563938	-0.0210471	0.00316846	3.08027e-11	DUS7	0.0002489	-0.212127
3	52567617	52567617	rs66782572	G	A	0.53812	-0.020881	0.001983	6.9e-26	563940	-0.0210979	0.00198267	1.91752e-26	NT5D2	-0.0002169	0.556109
3	53094194	53094194	rs11712910	A	C	0.28451	0.01461	0.002178	2.04e-11	563944	0.014679	0.00217762	1.57461e-11	SMBT1	6.9e-05	0.112457
3	56771251	56771251	rs3772219	C	A	0.32169	-0.027079	0.001965	3.49e-43	562360	-0.0271283	0.00196465	2.27538e-43	ARHG3	-4.93e-05	0.185771
3	57931931	57931931	rs55810936	A	G	0.066787	0.020929	0.003743	2.3e-08	563940	0.0208871	0.00374242	2.38891e-08	SLMAP	-4.19e-05	-0.016472
3	69909094	69909094	rs7623486	G	A	0.191329	-0.016425	0.002352	3.02e-12	562357	-0.0165876	0.0023516	1.74134e-12	MITF	-0.0001626	0.239123
3	72396329	72396329	rs11708187	A	G	0.23909	0.015748	0.002161	3.29e-13	563925	0.0155533	0.00216066	6.09114e-13	RYBP	-0.0001947	-0.267503
3	114520038	114520038	rs12695307	A	T	0.741177	0.012374	0.002111	4.72e-09	562857	0.0122409	0.00211066	6.64799e-09	ZBT20	-0.0001331	-0.148748
3	121415720	121415720	rs3732410	C	T	0.230145	0.013003	0.002176	2.34e-09	562361	0.0128551	0.00217563	3.44803e-09	GOGB1	-0.0001479	-0.168355
3	121634887	121634887	rs1357531	A	G	0.472019	-0.016948	0.001839	3.29e-20	563941	-0.0169776	0.00183869	2.61835e-20	S15A2	-2.96e-05	0.0991682
3	125987924	125987924	rs9825772	G	A	0.592087	-0.014192	0.001924	1.69e-13	562359	-0.0142191	0.00192367	1.45023e-13	AL1L1	-2.71e-05	0.0664498
3	132014398	132014398	rs2369603	C	G	0.279804	-0.014047	0.002058	8.99e-12	562858	-0.0142589	0.00205767	4.21909e-12	CPNE4	-0.0002119	0.328541
3	132226100	132226100	rs79953286	G	A	0.058784	-0.032845	0.003931	6.84e-17	562362	-0.0328524	0.00393039	6.34879e-17	DJC13	-7.4e-06	0.0323651
3	141092050	141092050	rs4683603	T	G	0.411158	0.014729	0.001884	5.55e-15	563943	0.0146329	0.0018837	7.96234e-15	ZBT38	-9.61e-05	-0.156748
3	142340201	142340201	rs9857567	A	G	0.162737	-0.014118	0.002492	1.5e-08	561920	-0.0141574	0.00249157	1.33032e-08	PLSI	-3.94e-05	0.0521351
3	143845892	143845892	rs1373866	T	C	0.687228	-0.011608	0.001995	6.11e-09	563944	-0.0115193	0.00199465	7.69179e-09	DIA1	8.87e-05	-0.0999862
3	151960936	151960936	rs323618	T	G	0.352329	0.011402	0.001941	4.4e-09	561275	0.0114143	0.00194067	4.0621e-09	MBNL1	1.23e-05	0.0347021
3	154696080	154696080	rs9860660	A	G	0.485398	-0.011757	0.001884	4.49e-10	563944	-0.011789	0.0018837	3.88804e-10	NEP	-3.2e-05	0.0625156
3	156340312	156340312	rs9814533	C	A	0.235029	0.013223	0.0022	1.92e-09	563945	0.0134571	0.00219966	9.48656e-10	PARPT	0.0002341	0.306192
3	168934639	168934639	rs3106819	A	C	0.468244	0.010581	0.001864	1.42e-08	563924	0.0106623	0.0018637	1.05873e-08	EVI1	8.13e-05	0.127503
3	169096900	169096900	rs1290784	T	C	0.447814	-0.018023	0.001873	6.84e-22	563889	-0.0180994	0.00187267	4.24528e-22	EVI1	-7.64e-05	0.20715
3	172294500	172294500	rs79287178	A	G	0.031245	-0.04455	0.005528	8.13e-16	563945	-0.044412	0.00552716	9.34083e-16	TNF10	0.000138	-0.0602949
3	177078634	177078634	rs11915331	A	G	0.39743	0.01236	0.001889	6.23e-11	562855	0.0124315	0.0018887	4.6404e-11	TBL1R	7.15e-05	0.127933
3	184030387	184030387	rs34881379	C	T	0.480024	-0.010434	0.001863	2.21e-08	562358	-0.0103034	0.0018627	3.17653e-08	EI2BE	0.0001306	-0.157561
3	187632238	187632238	rs9810106	C	G	0.464674	0.01254	0.001847	1.15e-11	563004	0.0125326	0.00184668	1.14847e-11	BCL6	-7.4e-06	0.000578185
3	193810750	193810750	rs7642977	C	T	0.692002	0.013276	0.002006	3.78e-11	562996	0.013276	0.00200567	3.61095e-11	HES1	0	0.0198703
3	194405984	194405984	rs1675919	A	G	0.230957	-0.012029	0.002188	3.93e-08	563946	-0.0119896	0.00218766	4.24032e-08	FA43A	3.94e-05	-0.0330061
3	194522048	194522048	rs9878967	T	C	0.264008	-0.015114	0.0021	6.43e-13	559205	-0.0150499	0.00209964	7.61728e-13	FA43A	6.41e-05	-0.0735889
3	194681871	194681871	rs711991	C	A	0.568957	-0.018753	0.001858	6.22e-24	562861	-0.0187998	0.0018577	4.50792e-24	XXLT1	-4.68e-05	0.139814
3	195628001	195628001	rs4927790	T	G	0.246568	0.013586	0.002175	4.34e-10	563940	0.0134036	0.00217465	7.11174e-10	ACK1	-0.0001824	-0.214486
3	195650428	195650428	rs73208017	G	C	0.138209	-0.020738	0.00274	3.99e-14	563942	-0.0208415	0.00273956	2.7924e-14	ACK1	-0.0001035	0.154995
3	195813757	195813757	rs58365266	T	C	0.215266	0.017752	0.002244	2.69e-15	563945	0.017715	0.00224364	2.88802e-15	TFR1	-3.7e-05	-0.0308479
3	196178824	196178824	rs7372951	A	G	0.237896	-0.01297	0.002175	2.54e-09	562855	-0.0131967	0.00217463	1.29112e-09	RN168	-0.0002267	0.293867
4	6883012	6883012	rs3733606	T	C	0.178313	0.013207	0.002414	4.56e-08	559205	0.013175	0.00241358	4.79709e-08	K0232	-3.2e-05	-0.022013
4	10155729	10155729	rs55683032	C	G	0.237458	0.012748	0.002241	1.31e-08	526245	0.0128589	0.00224065	9.52797e-09	WDR1	0.0001109	0.138271
4	23631034	23631034	rs6845167	C	T	0.286975	-0.012659	0.002009	3.07e-10	562361	-0.01276	0.00200865	2.11788e-10	PRGC1	-0.000101	0.161237
4	23743838	23743838	rs73260456	A	G	0.047643	0.042163	0.004329	2.17e-22	563944	0.0422468	0.00432831	1.66207e-22	PRGC1	8.38e-05	0.11581
4	23813109	23813109	rs7667050	T	C	0.46775	0.011073	0.001843	1.94e-09	563943	0.0111568	0.00184271	1.40807e-09	PRGC1	8.38e-05	0.139177
4	23888619	23888619	rs2970876	A	G	0.509627	0.011652	0.001848	2.94e-10	563001	0.0115091	0.00184771	4.69916e-10	PRGC1	-0.0001429	-0.203673
4	26152727	26152727	rs77849807	G	A	0.015352	-0.043337	0.007734	2.15e-08	563944	-0.0440788	0.00773277	1.19628e-08	SUH	-0.0007418	0.254606
4	26166830	26166830	rs10004084	C	T	0.167865	-0.014036	0.002488	1.74e-08	560788	-0.0139966	0.00248757	1.83802e-08	SUH	3.94e-05	-0.023801
4	40326896	40326896	rs6840327	T	A	0.482014	-0.011907	0.001849	1.25e-10	563943	-0.0119809	0.00184871	9.12951e-11	ACHA9	-7.39e-05	0.136463
4	48492769	48492769	rs74929644	T	A	0.461381	0.013829	0.001844	6.63e-14	563935	0.0139448	0.00184371	3.92485e-14	ZAR1	0.0001158	0.22769
4	49084371	49084371	rs34515618	C	T	0.491476	0.01016	0.001851	4.13e-08	563005	0.010298	0.00185071	2.63115e-08	PG2IP	0.000138	0.195804
4	52935445	52935445	rs12500231	T	A	0.563263	0.010267	0.001871	4.19e-08	559700	0.0104518	0.00187068	2.30776e-08	MIEAP	0.0001848	0.259023
4	55225325	55225325	rs114002064	T	G	0.026682	-0.039966	0.005793	5.42e-12	563946	-0.0398452	0.00579211	6.01771e-12	PGFRA	0.0001208	-0.045432
4	55276359	55276359	rs34467364	G	C	0.012253	-0.04825	0.008624	2.26e-08	563945	-0.0480529	0.00862263	2.50565e-08	PGFRA	0.0001971	-0.044812
4	55277208	55277208	rs11729772	A	G	0.328116	0.020746	0.00196	3.68e-26	563929	0.0205045	0.00195969	1.27553e-25	PGFRA	-0.0002415	-0.539843
4	55385147	55385147	rs140186102	A	G	0.019153	-0.039254	0.006851	1.03e-08	563931	-0.0391086	0.00684993	1.13411e-08	KIT	0.0001454	-0.041818
4	55408875	55408875	rs218264	T	A	0.250824	-0.041517	0.002145	2.28e-83	563944	-0.0414258	0.00214463	3.93821e-83	KIT	9.12e-05	-0.237364
4	55429886	55429886	rs78941817	G	C	0.015639	-0.045998	0.007825	4.26e-09	563946	-0.0457195	0.00782377	5.10638e-09	KIT	0.0002785	-0.0787035
4	55794469	55794469	rs114922507	T	C	0.044411	-0.029723	0.004552	6.84e-11	563005	-0.0298068	0.00455128	5.78873e-11	VGFR2	-8.38e-05	0.0724728
4	55928318	55928318	rs4438810	G	A	0.585469	0.010377	0.001884	3.72e-08	563934	0.0104214	0.0018837	3.15885e-08	VGFR2	4.44e-05	0.0710139
4	69355709	69355709	rs62317882	C	T	0.649447	-0.011341	0.001998	1.41e-08	557758	-0.011235	0.00199768	1.8653e-08	TM11E	0.000106	-0.12153
4	69569975	69569975	rs141694485	A	G	0.056539	-0.024766	0.004052	1.02e-09	558844	-0.0248079	0.00405135	9.16196e-10	UDB15	-4.19e-05	0.0466118
4	77159700	77159700	rs1441922	A	G	0.187391	-0.016334	0.00236	4.62e-12	562362	-0.0164178	0.0023596	3.45444e-12	FA47E	-8.38e-05	0.126264
4	77373079	77373079	rs2870238	T	C	0.499849	0.024552	0.001839	1.3e-40	563943	0.0245668	0.00183871	1.02356e-40	SHRM3	1.48e-05	0.10383
4	79255308	79255308	rs531553	G	A	0.259625	0.012045	0.002099	9.86e-09	563939	0.012045	0.00209866	9.50254e-09	FRAS1	0	0.0160372
4	79617742	79617742	rs77227177	T	C	0.078653	-0.02	0.00344	6.26e-09	562861	-0.020069	0.00343947	5.38177e-09	BMP2K	-6.9e-05	0.0656492
4	79624741	79624741	rs11728572	T	C	0.04627	0.033707	0.004426	2.74e-14	563942	0.0338672	0.00442523	1.96047e-14	BMP2K	0.0001602	0.14539
4	79714654	79714654	rs115024193	A	T	0.03501	0.030164	0.005135	4.38e-09	563944	0.0303562	0.00513419	3.36832e-09	BMP2K	0.0001922	0.114061
4	81157098	81157098	rs6848130	C	T	0.280489	0.013496	0.002056	5.37e-11	563002	0.0136168	0.00205565	3.49447e-11	FGF5	0.0001208	0.186593
4	81174592	81174592	rs13125101	A	G	0.293239	0.023799	0.002021	5.52e-32	563004	0.023937	0.00202068	2.25743e-32	FGF5	0.000138	0.388325
4	83500686	83500686	rs7689845	G	A	0.160111	-0.014494	0.002518	8.87e-09	563939	-0.0145605	0.00251757	7.31292e-09	T150C	-6.65e-05	0.0838328
4	83886422	83886422	rs16999103	A	G	0.186353	-0.017776	0.002359	5.07e-14	563944	-0.0177292	0.00235862	5.61556e-14	LIN54	4.68e-05	-0.0443851
4	87473776	87473776	rs4478147	A	G	0.510723	0.017488	0.00184	2.1e-21	562358	0.0175595	0.00183968	1.36288e-21	MK10	7.15e-05	0.187762
4	87788050	87788050	rs138985223	G	A	0.082917	0.03049	0.003349	9.12e-20	563944	0.0305319	0.00334848	7.64287e-20	CD036	4.19e-05	0.0767384
4	87984331	87984331	rs28432336	G	A	0.377142	0.031025	0.001905	1.41e-59	563924	0.0311655	0.00190471	3.55151e-60	AFF1	0.0001405	0.598806
4	88160252	88160252	rs4331742	G	A	0.37011	0.017899	0.00191	7.59e-21	560783	0.0178891	0.00190967	7.41487e-21	KLHL8	-9.9e-06	0.0101382
4	88438330	88438330	rs10004408	C	T	0.246739	-0.01542	0.00213	4.7e-13	563942	-0.0154964	0.00212964	3.42498e-13	SPRL1	-7.64e-05	0.13744
4	89737457	89737457	rs7694958	C	T	0.532235	-0.016524	0.001844	3.42e-19	563944	-0.016662	0.00184368	1.60528e-19	FA13A	-0.000138	0.328475
4	100281078	100281078	rs12649804	C	T	0.269855	-0.014169	0.002083	1.07e-11	563929	-0.0139226	0.00208266	2.30959e-11	ADH1B	0.0002464	-0.334151
4	103188709	103188709	rs13107325	T	C	0.074272	0.04586	0.003523	1.06e-38	562363	0.0447067	0.00352239	6.53741e-37	S39A8	-0.0011533	-1.7901
4	115321016	115321016	rs4561982	C	T	0.363738	-0.010687	0.001948	4.18e-08	558118	-0.0107141	0.00194767	3.7765e-08	CGT	-2.71e-05	0.0440868
4	115538142	115538142	rs35182026	T	C	0.181769	-0.020983	0.002388	1.65e-18	563936	-0.0209312	0.00238763	1.84245e-18	CGT	5.18e-05	-0.0479118
4	124756520	124756520	rs77173582	T	C	0.110932	-0.020814	0.002932	1.3e-12	563942	-0.0209224	0.00293155	9.54019e-13	SPY1	-0.0001084	0.134386
4	146055117	146055117	rs11545157	C	T	0.112422	0.018008	0.002922	7.33e-10	562361	0.0178996	0.00292154	8.9685e-10	OTUD4	-0.0001084	-0.0876158
4	146480448	146480448	rs13145825	C	T	0.56151	0.013826	0.001852	8.79e-14	563002	0.0138482	0.00185171	7.51173e-14	SMAD1	2.22e-05	0.0682489
4	148457326	148457326	rs10305916	G	T	0.19631	-0.016859	0.002313	3.29e-13	563005	-0.0167999	0.00231264	3.74785e-13	EDNRA	5.91e-05	-0.0565863
4	148975635	148975635	rs6827412	G	A	0.391829	0.016149	0.001894	1.58e-17	562859	0.0160677	0.00189371	2.16159e-17	RHG10	-8.13e-05	-0.136116
5	448291	448291	rs72717436	A	C	0.400582	0.017771	0.001875	2.71e-21	563946	0.0177784	0.0018747	2.46297e-21	EXOC3	7.4e-06	0.0415102
5	1059714	1059714	rs117617134	T	C	0.012746	-0.053382	0.008755	1.11e-09	493128	-0.0534485	0.00875353	1.02199e-09	S12A7	-6.65e-05	0.0358763
5	1113244	1113244	rs4580814	T	G	0.590884	-0.014682	0.00198	1.26e-13	507454	-0.0146302	0.00197965	1.4648e-13	S12A7	5.18e-05	-0.0654078
5	1284135	1284135	rs4449583	T	C	0.327779	0.012435	0.002075	2.11e-09	506622	0.0124941	0.00207465	1.71978e-09	TERT	5.91e-05	0.0888096
5	4031987	4031987	rs11750208	T	C	0.299404	-0.011841	0.002035	6.06e-09	547594	-0.0118459	0.00203465	5.81176e-09	IRX1	-4.9e-06	0.018165
5	34507175	34507175	rs6897430	G	A	0.468393	-0.015724	0.001866	3.8e-17	560785	-0.0156969	0.00186568	3.97941e-17	RAI14	2.71e-05	-0.0200351
5	34661070	34661070	rs463036	C	G	0.537829	-0.016123	0.001848	2.83e-18	563942	-0.0162068	0.00184771	1.76628e-18	RAI14	-8.38e-05	0.204727
5	38873618	38873618	rs375155	T	C	0.166326	-0.018205	0.002468	1.69e-13	563943	-0.0182247	0.00246762	1.51834e-13	OSMR	-1.97e-05	0.0465177
5	38985269	38985269	rs1239259	A	C	0.370084	0.014314	0.001921	9.57e-14	562359	0.0144372	0.00192067	5.61563e-14	RICTR	0.0001232	0.231513
5	39743954	39743954	rs72745623	G	A	0.280608	-0.013368	0.002059	8.67e-11	563001	-0.013368	0.00205867	8.38614e-11	DAB2	0	0.014457
5	40620582	40620582	rs4957325	C	T	0.118665	0.021888	0.002869	2.49e-14	563005	0.0219373	0.00286854	2.04851e-14	PE2R4	4.93e-05	0.0847613
5	43627768	43627768	rs6451719	C	T	0.048732	-0.026215	0.004298	1.09e-09	560787	-0.0262027	0.00429726	1.07717e-09	NNTM	1.23e-05	0.00514225
5	52230963	52230963	rs76687972	T	G	0.058382	-0.023907	0.00393	1.22e-09	563946	-0.024077	0.00392939	8.93124e-10	ITA1	-0.00017	0.135448
5	53283630	53283630	rs1694068	T	A	0.382438	-0.010642	0.001898	2.12e-08	563940	-0.0108219	0.00189771	1.17985e-08	ARL15	-0.0001799	0.254509
5	55444683	55444683	rs7731626	A	G	0.373497	0.010654	0.00191	2.48e-08	563002	0.0105776	0.0019097	3.04428e-08	ANR55	-7.64e-05	-0.0890329
5	55794652	55794652	rs7702087	T	C	0.068644	-0.024686	0.003672	1.83e-11	563941	-0.0246737	0.00367138	1.81051e-11	ANR55	1.23e-05	0.00465016
5	55806751	55806751	rs459193	A	G	0.254164	-0.018753	0.002109	6.43e-19	563303	-0.0187678	0.00210863	5.56094e-19	ANR55	-1.48e-05	0.0630628
5	55860781	55860781	rs3936511	G	A	0.190884	0.015317	0.002339	5.97e-11	563943	0.0153564	0.00233859	5.15043e-11	M3K1	3.94e-05	0.0641308
5	57487610	57487610	rs2910597	A	C	0.457757	0.010703	0.001851	7.51e-09	559199	0.0107326	0.00185071	6.66426e-09	PLK2	2.96e-05	0.051888
5	71894672	71894672	rs62360619	G	A	0.103248	0.018238	0.003056	2.46e-09	563944	0.0181887	0.00305553	2.63713e-09	ZN366	-4.93e-05	-0.0301964
5	71899195	71899195	rs33427	T	C	0.146122	-0.016057	0.002659	1.6e-09	560788	-0.0161753	0.00265857	1.17078e-09	ZN366	-0.0001183	0.135645
5	72144005	72144005	rs34651	C	T	0.080341	-0.037673	0.003422	3.77e-28	563944	-0.0374537	0.00342142	6.88154e-28	TNPO1	0.0002193	-0.261344
5	72411777	72411777	rs6414950	C	T	0.134198	0.019835	0.002758	6.63e-13	563943	0.0197463	0.00275752	8.0152e-13	TM171	-8.87e-05	-0.0824008
5	76476692	76476692	rs2928168	T	G	0.13955	0.024797	0.002679	2.23e-20	562529	0.024935	0.00267856	1.28891e-20	PDE8B	0.000138	0.238082
5	88110363	88110363	rs165944	C	T	0.235829	0.016268	0.002174	7.65e-14	561919	0.0159057	0.00217367	2.52692e-13	MEF2C	-0.0003623	-0.51893
5	90553428	90553428	rs2973478	T	C	0.797326	0.012584	0.00229	3.98e-08	563944	0.0125889	0.00228963	3.83607e-08	GPR98	4.9e-06	0.0159965
5	111206321	111206321	rs10041569	A	G	0.114202	0.019811	0.002943	1.75e-11	563944	0.019912	0.0029425	1.31447e-11	NREP	0.000101	0.124287
5	111304403	111304403	rs77486408	A	C	0.065548	-0.029247	0.003749	6.39e-15	563946	-0.0289809	0.0037484	1.06264e-14	NREP	0.0002661	-0.220885
5	121748004	121748004	rs34880730	G	A	0.347365	-0.010956	0.001949	1.93e-08	563942	-0.0109166	0.00194869	2.11892e-08	SNCAP	3.94e-05	-0.0405573
5	127249194	127249194	rs9327455	A	G	0.1838	-0.019125	0.002392	1.34e-15	560788	-0.019194	0.00239159	1.0101e-15	S12A2	-6.9e-05	0.12274
5	135419159	135419159	rs4976473	C	A	0.516597	0.010229	0.001845	3.02e-08	563945	0.0101206	0.00184468	4.10337e-08	BGH3	-0.0001084	-0.133134
5	137000719	137000719	rs2905582	C	T	0.190156	0.016914	0.002359	7.83e-13	563943	0.016914	0.0023586	7.43385e-13	KLHL3	0	0.022548
5	137581901	137581901	rs10479180	T	C	0.386099	0.010877	0.001899	1.05e-08	562856	0.0108302	0.00189867	1.16969e-08	GFRA3	-4.68e-05	-0.0468815
5	142623471	142623471	rs258753	T	C	0.319452	-0.014204	0.001992	1.05e-12	558117	-0.0143174	0.00199166	6.54242e-13	RHG26	-0.0001134	0.205451
5	147944487	147944487	rs67809946	G	A	0.5368	0.01165	0.001846	2.89e-10	563927	0.011581	0.00184571	3.50639e-10	5HT4R	-6.9e-05	-0.0839624
5	150038672	150038672	rs14458	C	T	0.022632	-0.03826	0.006413	2.51e-09	563004	-0.0380678	0.00641199	2.90337e-09	SYNPO	0.0001922	-0.0632287
5	154027216	154027216	rs74417235	G	A	0.094712	0.030119	0.003157	1.53e-21	563000	0.0300377	0.00315651	1.79795e-21	LARP1	-8.13e-05	-0.0700862
5	158476709	158476709	rs17645325	C	T	0.123155	-0.016708	0.002802	2.55e-09	562362	-0.0169298	0.00280152	1.51209e-09	COE1	-0.0002218	0.226963
5	172675053	172675053	rs62378333	G	C	0.204052	-0.013409	0.002357	1.31e-08	563944	-0.0133597	0.00235662	1.43629e-08	NKX25	4.93e-05	-0.0399708
5	176531283	176531283	rs244719	T	C	0.248204	0.015407	0.00218	1.64e-12	563005	0.0152517	0.00217965	2.60868e-12	FGFR4	-0.0001553	-0.201577
5	176800361	176800361	rs11748297	A	G	0.271777	0.025825	0.002099	9.55e-35	563674	0.0257166	0.00209868	1.60473e-34	RGS14	-0.0001084	-0.225399
5	176941427	176941427	rs2630757	G	A	0.209882	-0.019245	0.002395	9.81e-16	556698	-0.0192327	0.00239461	9.61736e-16	DDX41	1.23e-05	0.00861313
6	1605241	1605241	rs56210598	C	G	0.308594	0.013575	0.002109	1.27e-10	546504	0.0136391	0.00210866	9.92211e-11	FOXC1	6.41e-05	0.1072
6	1708802	1708802	rs9503015	G	C	0.392113	0.011298	0.001948	6.8e-09	542408	0.0113645	0.00194767	5.38067e-09	GMDS	6.65e-05	0.101673
6	1750576	1750576	rs10458130	T	C	0.450052	0.015606	0.001854	4.05e-17	563939	0.0156011	0.00185371	3.89056e-17	GMDS	-4.9e-06	0.0174429
6	2050791	2050791	rs115986297	A	G	0.455518	0.023977	0.001848	1.89e-38	563943	0.024147	0.00184771	4.97448e-39	GMDS	0.00017	0.579714
6	2518115	2518115	rs1272694	C	G	0.234995	0.012471	0.002178	1.06e-08	562860	0.0122911	0.00217765	1.65946e-08	CF195	-0.0001799	-0.194661
6	6735022	6735022	rs1294404	G	A	0.393644	0.010977	0.001893	6.89e-09	563001	0.0109055	0.00189267	8.31333e-09	LY86	-7.15e-05	-0.0815558
6	7056253	7056253	rs11243141	C	G	0.09701	0.017688	0.003172	2.51e-08	562520	0.0176609	0.00317151	2.56772e-08	RREB1	-2.71e-05	-0.00987394
6	7232389	7232389	rs75757892	T	C	0.179504	0.03246	0.002404	1.64e-41	563943	0.0326177	0.00240362	6.01419e-42	RREB1	0.0001577	0.435667
6	7240876	7240876	rs41302867	A	G	0.122257	-0.026438	0.00282	7.31e-21	563942	-0.0265464	0.00281955	4.72567e-21	RREB1	-0.0001084	0.189454
6	7784476	7784476	rs78798600	A	G	0.065309	0.020634	0.003728	3.2e-08	563926	0.0205749	0.00372742	3.39266e-08	BMP6	-5.91e-05	-0.0253904
6	7884242	7884242	rs17696707	A	G	0.090011	-0.018866	0.003218	4.69e-09	563004	-0.0191666	0.00321744	2.56743e-09	TXND5	-0.0003006	0.261674
6	12288422	12288422	rs2859337	A	G	0.249606	0.01731	0.002163	1.28e-15	562962	0.0172952	0.00216265	1.27265e-15	EDN1	-1.48e-05	0.00250099
6	13509565	13509565	rs2560787	A	G	0.310719	0.013746	0.001999	6.32e-12	561916	0.0138249	0.00199868	4.61281e-12	GFOD1	7.89e-05	0.136752
6	16203927	16203927	rs79605690	G	A	0.057648	-0.024799	0.004016	6.82e-10	563946	-0.0247941	0.00401538	6.62557e-10	GMPR1	4.9e-06	0.0125611
6	16290761	16290761	rs1042391	T	A	0.613097	0.020908	0.001892	2.4e-28	563937	0.0207454	0.00189167	5.52666e-28	GMPR1	-0.0001626	-0.362252
6	20860948	20860948	rs9350292	A	G	0.23637	0.012911	0.002168	2.68e-09	563936	0.0129135	0.00216765	2.56364e-09	CDKAL	2.5e-06	0.0192778
6	21150647	21150647	rs7752788	A	G	0.319495	0.012028	0.001977	1.21e-09	563940	0.0120354	0.00197665	1.13777e-09	CDKAL	7.4e-06	0.0267309
6	22059967	22059967	rs1207782	T	C	0.615278	0.014996	0.001901	3.18e-15	561276	0.0149048	0.00190068	4.43994e-15	PRL	-9.12e-05	-0.14495
6	22125157	22125157	rs9368402	C	T	0.544163	-0.017656	0.00185	1.49e-21	560786	-0.0176215	0.00184968	1.62253e-21	PRL	3.45e-05	-0.0370065
6	24397110	24397110	rs12192883	G	T	0.275985	0.0153	0.002172	1.95e-12	563004	0.015332	0.00217165	1.66407e-12	MRS2	3.2e-05	0.068863
6	24595238	24595238	rs114298881	T	C	0.011336	0.047835	0.008703	3.97e-08	563033	0.0480371	0.00870162	3.38082e-08	K0319	0.0002021	0.0697685
6	25170568	25170568	rs78696919	A	G	0.019173	0.065632	0.00678	3.92e-22	562091	0.0658563	0.00677893	2.6066e-22	LR16A	0.0002243	0.177212
6	25172912	25172912	rs10807000	A	G	0.336037	0.016551	0.002026	3.21e-16	562853	0.0165855	0.00202568	2.66464e-16	LR16A	3.45e-05	0.0808665
6	25189491	25189491	rs115883735	T	A	0.027255	-0.043339	0.005914	2.43e-13	563942	-0.043031	0.00591307	3.40661e-13	LR16A	0.000308	-0.146716
6	25342915	25342915	rs34283429	C	T	0.228156	0.013098	0.002199	2.65e-09	563942	0.0130339	0.00219866	3.06412e-09	LR16A	-6.41e-05	-0.0630599
6	25378113	25378113	rs1927695	G	A	0.168909	0.056584	0.002462	7.2e-117	559844	0.0566284	0.00246157	4.1582e-117	LR16A	4.44e-05	0.238427
6	25528452	25528452	rs72839066	G	A	0.03948	0.050002	0.004833	4.71e-25	563943	0.0498788	0.00483226	5.60179e-25	LR16A	-0.0001232	-0.0753059
6	25696404	25696404	rs114455531	A	C	0.007234	0.111631	0.011246	3.42e-23	558189	0.111771	0.0112442	2.77918e-23	SEGN	0.00014	0.0901094
6	25712496	25712496	rs115902543	A	C	0.014139	0.054982	0.007883	3.18e-12	562362	0.0551175	0.00788179	2.69021e-12	SEGN	0.0001355	0.0726409
6	26027141	26027141	rs114259939	A	G	0.018794	-0.045012	0.006853	5.27e-11	563004	-0.0448839	0.00685191	5.73215e-11	H4	0.0001281	-0.0365069
6	26988780	26988780	rs114804553	A	T	0.044675	-0.03307	0.004506	2.25e-13	563942	-0.0333337	0.00450528	1.37422e-13	H2B1J	-0.0002637	0.214126
6	27001055	27001055	rs13191659	G	C	0.084113	0.113196	0.00338	7.29e-246	563945	0.113307	0.00337947	1.8838e-246	H2B1J	0.000111	0.587693
6	27091383	27091383	rs75040706	G	A	0.029925	0.088924	0.005435	4.11e-60	563945	0.0892986	0.00543414	1.11265e-60	H2B1J	0.0003746	0.567483
6	27157050	27157050	rs74931492	T	C	0.03385	0.039198	0.005099	1.57e-14	562509	0.0394494	0.0050982	1.01077e-14	H2A1H	0.0002514	0.191247
6	27160218	27160218	rs115999750	A	G	0.035056	-0.042273	0.005065	7.38e-17	562082	-0.0423469	0.0050642	6.16536e-17	H2A1H	-7.39e-05	0.0780979
6	27192107	27192107	rs150197496	A	T	0.018078	0.058079	0.007348	2.82e-15	563938	0.058185	0.0073469	2.38155e-15	TSSP	0.000106	0.0733894
6	27546448	27546448	rs116724532	G	A	0.04254	-0.025814	0.004606	2.14e-08	563005	-0.026122	0.00460527	1.40967e-08	ZN184	-0.000308	0.181296
6	27586230	27586230	rs13217599	C	T	0.084128	0.095467	0.003395	6.78e-174	563943	0.095499	0.00339442	3.74428e-174	ZN184	3.2e-05	0.257861
6	27689939	27689939	rs2056923	C	T	0.175138	-0.03154	0.002417	7.27e-39	562362	-0.0317002	0.00241658	2.60491e-39	H2B1L	-0.0001602	0.445742
6	27700191	27700191	rs147006490	C	T	0.023231	0.042781	0.006537	6.2e-11	563899	0.0428771	0.00653602	5.3761e-11	H2B1L	9.61e-05	0.0619244
6	27812294	27812294	rs74856797	C	T	0.032579	0.087087	0.005278	4.17e-61	563945	0.0874591	0.00527716	1.08995e-61	H2B1N	0.0003721	0.582729
6	27818093	27818093	rs77377107	G	C	0.033193	-0.040432	0.005421	9.12e-14	561920	-0.0404911	0.00542016	7.99127e-14	H2B1N	-5.91e-05	0.057379
6	27858421	27858421	rs200973	G	A	0.185481	-0.049325	0.002365	1.45e-96	560787	-0.0493891	0.00236462	7.07853e-97	H31	-6.41e-05	0.311425
6	28056250	28056250	rs17710827	T	G	0.041441	0.026683	0.004659	1.04e-08	563006	0.0267274	0.00465828	9.6028e-09	ZN165	4.44e-05	0.0346355
6	28103409	28103409	rs35111391	T	G	0.080349	0.09312	0.003496	3.15e-156	563944	0.0931619	0.00349547	1.68704e-156	ZSC16	4.19e-05	0.271185
6	28422921	28422921	rs78359265	A	G	0.034214	0.083061	0.00509	8.06e-60	563944	0.0834356	0.00508921	2.08968e-60	ZSC23	0.0003746	0.586255
6	28451829	28451829	rs76696782	T	C	0.057451	-0.027338	0.004007	9.26e-12	561219	-0.0271729	0.00400636	1.1817e-11	GPX6	0.0001651	-0.105896
6	28575928	28575928	rs7381750	G	C	0.08125	-0.020948	0.003375	5.58e-10	563945	-0.0206671	0.00337447	9.09495e-10	SCND3	0.0002809	-0.212166
6	28785085	28785085	rs3118362	C	T	0.091518	0.077095	0.003236	2.2e-125	556819	0.0770925	0.00323544	1.73137e-125	TRI27	-2.5e-06	0.104033
6	29107198	29107198	rs114685781	G	A	0.018472	0.043962	0.006914	2.1e-10	557481	0.044137	0.00691291	1.71712e-10	OR2J3	0.000175	0.0874186
6	29111775	29111775	rs3129120	C	T	0.115438	-0.052511	0.002885	5.8e-74	557752	-0.0527796	0.00288455	8.68763e-75	OR2J2	-0.0002686	0.824527
6	29510630	29510630	rs362538	C	G	0.094707	0.06434	0.003168	1.19e-91	558813	0.0643375	0.00316746	1.00599e-91	UBD	-2.5e-06	0.0729533
6	29557642	29557642	rs115503606	A	C	0.044724	-0.034661	0.004647	9.11e-14	558844	-0.0348384	0.00464627	6.47243e-14	GABR1	-0.0001774	0.148451
6	29919003	29919003	rs146202145	T	C	0.019173	0.077393	0.008719	7.29e-19	528436	0.0781274	0.00871753	3.18564e-19	1A03	0.0007344	0.359531
6	30033448	30033448	rs115056485	C	T	0.031826	0.039754	0.00546	3.45e-13	558843	0.0399462	0.00545911	2.52907e-13	RPA12	0.0001922	0.134858
6	30342753	30342753	rs3129817	A	G	0.139546	-0.046828	0.002658	1.97e-69	557258	-0.0470276	0.00265758	4.52697e-70	RPP21	-0.0001996	0.638659
6	30432545	30432545	rs143667674	G	A	0.01169	-0.066295	0.008577	1.13e-14	558840	-0.0664231	0.00857561	9.51419e-15	GNL1	-0.0001281	0.0747066
6	30824962	30824962	rs114944652	T	C	0.046832	0.024651	0.004377	1.83e-08	558843	0.0247767	0.00437634	1.50053e-08	DDR1	0.0001257	0.0862064
6	31081940	31081940	rs3130976	C	T	0.273688	-0.042195	0.00206	3.78e-93	562860	-0.0423478	0.00205967	6.20497e-94	PS1C1	-0.0001528	0.784752
6	31293562	31293562	rs191989932	T	A	0.168494	0.021326	0.003468	8.06e-10	440087	0.0211757	0.0034674	1.0147e-09	1B07	-0.0001503	-0.100003
6	31407331	31407331	rs2516470	G	C	0.334399	0.037113	0.001944	3.21e-81	562858	0.0372461	0.00194367	7.57199e-82	MICB	0.0001331	0.627295
6	31566063	31566063	rs116339629	A	G	0.011654	0.05805	0.008751	3.4e-11	557047	0.0584246	0.00874959	2.43203e-11	NCTR3	0.0003746	0.14551
6	31591198	31591198	rs147474235	T	C	0.008435	0.059537	0.01065	2.32e-08	561890	0.0595863	0.0106484	2.19595e-08	PRC2A	4.93e-05	0.0238655
6	31613739	31613739	rs3130048	C	T	0.275816	-0.031853	0.002064	1.16e-53	557111	-0.0322695	0.00206364	4.0636e-55	BAG6	-0.0004165	1.45555
6	31775984	31775984	rs35444838	C	T	0.014482	0.046987	0.00772	1.19e-09	556222	0.0473517	0.00771877	8.53651e-10	LSM2	0.0003647	0.144267
6	31835164	31835164	rs693906	C	G	0.153937	-0.047688	0.002555	1.12e-77	562838	-0.0480453	0.00255459	6.56382e-79	CTL4	-0.0003573	1.23206
6	31864674	31864674	rs2844456	C	T	0.056262	-0.044564	0.003996	7.49e-29	560501	-0.0448055	0.00399537	3.46671e-29	EHMT2	-0.0002415	0.334564
6	31930462	31930462	rs429608	A	G	0.155357	0.020521	0.002534	5.86e-16	561276	0.0207945	0.00253356	2.25555e-16	SKIV2	0.0002735	0.414645
6	32208698	32208698	rs394038	A	G	0.294821	-0.034887	0.002025	1.77e-66	556816	-0.0352345	0.00202468	7.9032e-68	NOTC4	-0.0003475	1.35017
6	32338901	32338901	rs2050191	A	T	0.243503	0.031999	0.002148	3.7e-50	558843	0.0322257	0.00214763	6.78655e-51	CF010	0.0002267	0.736553
6	32340872	32340872	rs3129944	G	C	0.218054	-0.03007	0.002241	5.35e-41	557756	-0.0302598	0.00224062	1.45946e-41	CF010	-0.0001898	0.564162
6	32462127	32462127	rs189745093	C	T	0.309191	-0.0329	0.002811	1.33e-31	407739	-0.0331809	0.00281051	3.63375e-32	DRB5	-0.0002809	0.563497
6	32470649	32470649	rs375519922	T	G	0.189382	-0.035089	0.003357	1.54e-25	407739	-0.0354389	0.00335642	4.63709e-26	DRB5	-0.0003499	0.521275
6	32471008	32471008	rs113664977	G	C	0.150088	-0.037561	0.004227	6.75e-19	407739	-0.0375585	0.00422626	6.28126e-19	DRB5	2.5e-06	0.031257
6	32487058	32487058	rs112858426	G	A	0.08168	-0.042998	0.005051	1.8e-17	445208	-0.0434391	0.00505019	7.86914e-18	DRB5	-0.0004411	0.359345
6	32489891	32489891	rs112906420	T	C	0.080301	-0.035798	0.006211	8.43e-09	407739	-0.0359582	0.00620992	7.02033e-09	DRB5	-0.0001602	0.07947
6	32515421	32515421	rs370750957	C	T	0.317433	-0.034201	0.002825	1.08e-33	407739	-0.0344943	0.00282451	2.66617e-34	DRB5	-0.0002933	0.607536
6	32537489	32537489	rs114012503	G	A	0.060437	-0.047407	0.006201	2.18e-14	444028	-0.047375	0.00619995	2.15223e-14	2B11	3.2e-05	0.00556781
6	32577633	32577633	rs535777	C	G	0.136954	-0.056173	0.002772	3.09e-91	551582	-0.0564539	0.00277155	3.14723e-92	DQA1	-0.0002809	0.99203
6	32607218	32607218	rs192165457	T	G	0.08509	-0.032857	0.005236	3.59e-10	412664	-0.033096	0.00523508	2.58252e-10	DQA1	-0.000239	0.143051
6	32609323	32609323	rs142591955	A	G	0.244778	-0.046247	0.002886	9.44e-58	410776	-0.0464786	0.0028855	2.25404e-58	DQA1	-0.0002316	0.62201
6	32610888	32610888	rs191251309	A	C	0.079288	-0.057743	0.005194	1.12e-28	448648	-0.0581866	0.0051931	3.87143e-29	DQA1	-0.0004436	0.461347
6	32614569	32614569	rs148889372	A	G	0.197982	-0.031777	0.00334	1.97e-21	412361	-0.0319446	0.00333942	1.11227e-21	DQA1	-0.0001676	0.248256
6	32615015	32615015	rs185831190	T	C	0.16184	-0.048066	0.003519	1.94e-42	416693	-0.0484011	0.00351839	4.64838e-43	DQA1	-0.0003351	0.6205
6	32617104	32617104	rs188694433	T	C	0.325729	-0.037697	0.002389	4.79e-56	449624	-0.0379607	0.00238859	7.14165e-57	DQA1	-0.0002637	0.826537
6	32618190	32618190	rs185774696	T	C	0.273471	-0.02636	0.002699	1.7e-22	445208	-0.0265645	0.00269853	7.27031e-23	DQA1	-0.0002045	0.368896
6	32624033	32624033	rs193147579	T	C	0.275346	-0.032347	0.002634	1.24e-34	488169	-0.0325244	0.00263355	4.86798e-35	DQA1	-0.0001774	0.406073
6	32629298	32629298	rs9273705	C	T	0.040699	0.039789	0.006662	2.41e-09	411718	0.0401611	0.00666085	1.64546e-09	DQA1	0.0003721	0.16573
6	32632689	32632689	rs41552812	T	C	0.061201	-0.064753	0.00515	3.22e-36	506422	-0.0651917	0.00514912	9.75877e-37	DQA1	-0.0004387	0.518461
6	32632995	32632995	rs41263828	G	C	0.215611	-0.033346	0.002515	4.26e-40	544858	-0.0335259	0.00251459	1.49694e-40	DQA1	-0.0001799	0.454205
6	32682812	32682812	rs9275602	A	C	0.188486	-0.040609	0.002361	2.95e-66	561272	-0.0408333	0.00236059	4.87771e-67	DQA2	-0.0002243	0.781606
6	32711050	32711050	rs9276425	T	C	0.206662	-0.022333	0.002273	9.47e-23	562848	-0.0224266	0.00227261	5.71651e-23	DQA2	-9.36e-05	0.219219
6	32805470	32805470	rs2071465	G	C	0.423155	-0.022257	0.001859	5.57e-33	561918	-0.0224739	0.00185868	1.17413e-33	TAP2	-0.0002169	0.676139
6	32888861	32888861	rs3132135	A	T	0.112853	0.023133	0.002927	2.83e-15	563006	0.0233499	0.00292654	1.47921e-15	DMB	0.0002169	0.281757
6	32902114	32902114	rs187764	T	C	0.067319	0.02027	0.003711	4.8e-08	563005	0.0203809	0.00371037	3.95271e-08	DMB	0.0001109	0.0843463
6	32903900	32903900	rs151719	C	T	0.239915	0.017764	0.002153	1.64e-16	559203	0.0177714	0.00215262	1.5103e-16	DMB	7.4e-06	0.0357806
6	32943752	32943752	rs3918154	G	A	0.018578	-0.042782	0.006833	3.93e-10	563946	-0.0430629	0.00683197	2.91652e-10	BRD2	-0.0002809	0.129528
6	32985660	32985660	rs143182128	G	C	0.007953	-0.064453	0.011389	1.56e-08	553430	-0.0646994	0.0113873	1.33335e-08	DOA	-0.0002464	0.0681804
6	33048628	33048628	rs1042136	C	A	0.163626	0.018328	0.002512	3.06e-13	563295	0.0182836	0.00251161	3.34658e-13	DPB1	-4.44e-05	-0.0388798
6	33120882	33120882	rs9277904	A	T	0.581964	-0.013722	0.001876	2.72e-13	561852	-0.0137072	0.0018757	2.71574e-13	COBA2	1.48e-05	0.000680715
6	33401291	33401291	rs116323349	A	C	0.042261	-0.028839	0.004609	4.06e-10	563940	-0.0289253	0.00460828	3.45619e-10	SYGP1	-8.63e-05	0.0699284
6	33607103	33607103	rs150273297	A	T	0.186025	0.017462	0.00239	2.88e-13	562378	0.0173955	0.00238963	3.34899e-13	ITPR3	-6.65e-05	-0.0655214
6	34238084	34238084	rs115614261	A	G	0.046498	0.033671	0.004511	8.71e-14	525161	0.034324	0.00451028	2.73718e-14	NUDT3	0.000653	0.502715
6	36207598	36207598	rs9380559	A	G	0.630085	0.013441	0.001912	2.12e-12	559201	0.0135199	0.00191168	1.52437e-12	PLPL1	7.89e-05	0.143245
6	36566575	36566575	rs9368943	T	C	0.220264	-0.014856	0.002212	1.94e-11	563945	-0.0149028	0.00221165	1.60236e-11	SRSF3	-4.68e-05	0.0830416
6	37027232	37027232	rs9366927	C	T	0.4899	0.019726	0.001845	1.18e-26	559844	0.0196989	0.00184468	1.28001e-26	FGD2	-2.71e-05	-0.0353314
6	39146230	39146230	rs1155347	C	T	0.220882	-0.017833	0.002241	1.86e-15	563000	-0.017594	0.00224065	4.08854e-15	KCNK5	0.000239	-0.342055
6	41167763	41167763	rs62396356	G	A	0.13298	0.015297	0.002724	2e-08	563002	0.0154892	0.00272357	1.29214e-08	TRML2	0.0001922	0.18972
6	41749401	41749401	rs12528644	A	C	0.285057	-0.011898	0.002054	7.08e-09	562997	-0.0121321	0.00205367	3.47304e-09	FRS3	-0.0002341	0.309323
6	43051614	43051614	rs6904780	G	A	0.38715	-0.014177	0.001895	7.62e-14	563004	-0.014145	0.00189468	8.29091e-14	PTK7	3.2e-05	-0.0366472
6	43065838	43065838	rs147176269	T	G	0.035256	-0.028072	0.004998	2e-08	563945	-0.0279759	0.00499722	2.16476e-08	PTK7	9.61e-05	-0.0343798
6	43616627	43616627	rs112466234	A	G	0.029144	-0.054077	0.005482	6.32e-23	563943	-0.0542569	0.00548114	4.2119e-23	RSPH9	-0.0001799	0.176239
6	43693425	43693425	rs72859083	G	T	0.047863	-0.027013	0.004355	5.74e-10	563941	-0.0269021	0.00435429	6.47937e-10	RT18A	0.0001109	-0.0526209
6	43710767	43710767	rs77398754	C	T	0.041371	-0.029055	0.004693	6.13e-10	563944	-0.0291068	0.00469225	5.53448e-10	VEGFA	-5.18e-05	0.0443837
6	43722953	43722953	rs833051	A	T	0.131948	0.026379	0.002747	8.18e-22	563941	0.0263223	0.00274656	9.35993e-22	VEGFA	-5.67e-05	-0.0585193
6	43737486	43737486	rs833061	C	T	0.498524	0.033242	0.001883	1.06e-69	563938	0.0333332	0.00188268	3.82742e-70	VEGFA	9.12e-05	0.4424
6	43753722	43753722	rs41282644	A	G	0.051777	0.030309	0.004593	4.28e-11	562991	0.0304002	0.00459227	3.59545e-11	VEGFA	9.12e-05	0.0756905
6	43760085	43760085	rs150140289	T	C	0.015214	-0.052139	0.008339	4.16e-10	562294	-0.0520922	0.00833767	4.16251e-10	VEGFA	4.68e-05	-0.000261959
6	43766929	43766929	rs114142949	T	C	0.037033	-0.059185	0.005313	8.59e-29	563942	-0.0592269	0.00531217	7.21793e-29	VEGFA	-4.19e-05	0.0755805
6	43796181	43796181	rs114773511	T	C	0.026663	0.032854	0.00589	2.49e-08	563923	0.0329058	0.00588906	2.30222e-08	VEGFA	5.18e-05	0.0340525
6	43800194	43800194	rs77537019	C	A	0.049596	0.029695	0.00457	8.39e-11	563003	0.0297049	0.00456928	7.97904e-11	VEGFA	9.9e-06	0.0218113
6	43801654	43801654	rs62401198	T	C	0.157361	-0.034608	0.00257	2.74e-41	562858	-0.0346006	0.00256959	2.49853e-41	VEGFA	7.4e-06	0.040066
6	43804825	43804825	rs2396084	A	G	0.312128	-0.036391	0.002001	7.31e-74	563004	-0.0364428	0.00200068	3.90812e-74	VEGFA	-5.18e-05	0.271949
6	43825459	43825459	rs9394969	T	G	0.466537	-0.019396	0.001864	2.45e-25	562359	-0.0192679	0.00186368	4.71309e-25	VEGFA	0.0001281	-0.28414
6	43868986	43868986	rs1539508	A	G	0.545047	0.020746	0.001923	4.15e-27	561274	0.0206893	0.00192267	5.27644e-27	CF223	-5.67e-05	-0.104293
6	43941137	43941137	rs17287978	C	T	0.047501	-0.069139	0.004591	3.28e-51	510121	-0.0690946	0.00459024	3.32423e-51	CF223	4.44e-05	-0.00581722
6	43977005	43977005	rs138975044	A	G	0.007065	-0.077544	0.012652	9.11e-10	503227	-0.0774405	0.0126499	9.252e-10	CF223	0.0001035	-0.00671725
6	44030011	44030011	rs833805	A	G	0.114697	-0.065863	0.003188	8.92e-95	507456	-0.0656166	0.00318746	3.67539e-94	RM14	0.0002464	-0.614939
6	44631183	44631183	rs581465	C	T	0.405989	0.011248	0.001867	1.74e-09	563943	0.0112012	0.0018667	1.9669e-09	SUPT3	-4.68e-05	-0.053233
6	46895045	46895045	rs7766349	T	G	0.615293	-0.010626	0.001894	2.07e-08	562499	-0.0105397	0.00189369	2.61088e-08	GP116	8.63e-05	-0.100817
6	50812906	50812906	rs2817419	G	A	0.263678	0.01576	0.002111	8.63e-14	562362	0.016418	0.00211063	7.32636e-15	AP2B	0.000658	1.07112
6	51098648	51098648	rs4533991	T	G	0.470378	-0.012563	0.001919	6.08e-11	563002	-0.0129647	0.00191869	1.40816e-11	AP2B	-0.0004017	0.635252
6	51838263	51838263	rs9296668	G	A	0.483048	0.014447	0.001861	8.73e-15	558114	0.01441	0.00186068	9.59581e-15	PKHD1	-3.7e-05	-0.0410674
6	52668670	52668670	rs3957356	T	C	0.42891	-0.023953	0.001866	1.12e-37	561452	-0.023953	0.0018657	9.96652e-38	GSTA1	0	0.0506745
6	56623751	56623751	rs13217390	T	C	0.176363	0.014029	0.00241	5.96e-09	563943	0.0139058	0.00240959	7.87892e-09	DYST	-0.0001232	-0.12122
6	100904188	100904188	rs241809	A	G	0.188767	-0.01727	0.002352	2.19e-13	562859	-0.0172207	0.0023516	2.42529e-13	SIM1	4.93e-05	-0.0443196
6	107172979	107172979	rs7766720	C	T	0.079953	-0.020308	0.003401	2.43e-09	563945	-0.0203696	0.00340045	2.09491e-09	GATA	-6.16e-05	0.0644409
6	109765818	109765818	rs2236582	G	C	0.332091	0.012917	0.001952	3.81e-11	560776	0.0131043	0.00195167	1.88825e-11	MICA1	0.0001873	0.304865
6	116422534	116422534	rs9400888	T	C	0.459713	-0.010574	0.001859	1.33e-08	562998	-0.0105592	0.0018587	1.33946e-08	NT5D1	1.48e-05	-0.00307811
6	125622737	125622737	rs112982980	G	T	0.182013	0.02255	0.002481	1.05e-19	563939	0.0225968	0.00248059	8.27887e-20	HDDC2	4.68e-05	0.103218
6	126223944	126223944	rs4897160	A	G	0.477574	0.017584	0.001906	2.94e-20	562357	0.0174361	0.00190567	5.71349e-20	NCOA7	-0.0001479	-0.288554
6	126760994	126760994	rs2184968	T	C	0.542652	0.020855	0.001917	1.54e-27	560784	0.020754	0.00191667	2.53195e-27	CENPW	-0.000101	-0.215934
6	127281547	127281547	rs987763	T	C	0.407168	-0.017143	0.001949	1.52e-18	563924	-0.0171455	0.00194866	1.38534e-18	RSPO3	-2.5e-06	0.0402872
6	127455138	127455138	rs7766106	T	C	0.490926	0.027194	0.001906	4.03e-46	562361	0.0271989	0.00190566	3.23847e-46	RSPO3	4.9e-06	0.0949652
6	130378833	130378833	rs12661188	T	C	0.314869	-0.022205	0.001976	2.89e-29	563939	-0.0224465	0.00197568	6.51011e-30	LMBL3	-0.0002415	0.64731
6	133946984	133946984	rs2636625	A	G	0.184976	-0.013812	0.002371	5.82e-09	562858	-0.0137504	0.00237062	6.6182e-09	EYA4	6.16e-05	-0.0558169
6	134141309	134141309	rs1041714	T	C	0.315401	-0.012557	0.001973	2.02e-10	562360	-0.0125693	0.00197265	1.8684e-10	TCF21	-1.23e-05	0.0338815
6	134234787	134234787	rs229925	A	G	0.242363	0.016604	0.002151	1.21e-14	562360	0.0166607	0.00215063	9.41836e-15	TCF21	5.67e-05	0.10881
6	135080061	135080061	rs9389226	G	A	0.1981	-0.015283	0.002299	3.05e-11	563941	-0.015283	0.0022986	2.95457e-11	AL8A1	0	0.0138056
6	135375992	135375992	rs41294850	C	T	0.062415	0.034568	0.003804	1.07e-19	563940	0.0343413	0.00380341	1.73141e-19	HBS1L	-0.0002267	-0.209016
6	135396546	135396546	rs75987577	C	G	0.032827	0.028991	0.005205	2.62e-08	563944	0.028784	0.00520419	3.18534e-08	HBS1L	-0.000207	-0.0848545
6	135419018	135419018	rs9399137	C	T	0.249054	-0.048392	0.002148	2.25e-112	563945	-0.0483452	0.00214763	3.23933e-112	HBS1L	4.68e-05	-0.158273
6	135437790	135437790	rs78574741	A	G	0.098676	0.027902	0.003111	3.18e-19	563892	0.0278182	0.00311053	3.77886e-19	HBS1L	-8.38e-05	-0.0749337
6	135537193	135537193	rs7738267	G	A	0.118696	-0.023867	0.002894	1.7e-16	560785	-0.0239508	0.00289351	1.25868e-16	MYB	-8.38e-05	0.130534
6	136217299	136217299	rs6570053	C	A	0.384385	0.012951	0.001897	9.03e-12	561277	0.0128992	0.00189668	1.03923e-11	PDE7B	-5.18e-05	-0.0610239
6	139835604	139835604	rs17585915	G	T	0.590222	-0.016696	0.001862	3.26e-19	562992	-0.0167551	0.0018617	2.25927e-19	CITE2	-5.91e-05	0.159249
6	142814991	142814991	rs9403391	T	C	0.031656	-0.034291	0.005325	1.24e-10	563944	-0.0345103	0.00532415	9.06047e-11	GP126	-0.0002193	0.136271
6	143142313	143142313	rs9791312	C	A	0.34739	0.012362	0.001958	2.78e-10	559187	0.0124655	0.00195766	1.92085e-10	ZEP2	0.0001035	0.160551
6	157288542	157288542	rs17322427	G	A	0.328941	0.013984	0.001968	1.25e-12	560785	0.0139939	0.00196766	1.14437e-12	ARI1B	9.9e-06	0.0383435
6	163758350	163758350	rs12527711	T	C	0.206902	-0.015642	0.002335	2.16e-11	563004	-0.0155681	0.00233463	2.58746e-11	PACRG	7.39e-05	-0.0784199
6	163777919	163777919	rs12203342	A	G	0.406778	-0.012106	0.001876	1.13e-10	561852	-0.0120592	0.0018757	1.28308e-10	PACRG	4.68e-05	-0.0551753
6	163812707	163812707	rs1737333	T	C	0.270915	0.013434	0.002067	8.28e-11	562861	0.0133231	0.00206665	1.14289e-10	QKI	-0.0001109	-0.139974
6	163941243	163941243	rs74960997	G	T	0.026142	-0.038559	0.005778	2.58e-11	563944	-0.0385836	0.0057771	2.4103e-11	QKI	-2.46e-05	0.0295486
6	166074760	166074760	rs2983533	C	G	0.273734	0.014925	0.002096	1.11e-12	561915	0.0150186	0.00209568	7.69449e-13	PDE10	9.36e-05	0.159143
6	170570685	170570685	rs3012439	C	G	0.642864	-0.012727	0.002025	3.35e-10	510114	-0.0127418	0.00202467	3.10845e-10	DLL1	-1.48e-05	0.0325009
6	170572325	170572325	rs112187434	T	C	0.017565	0.04522	0.007416	1.11e-09	510107	0.0450081	0.00741481	1.27892e-09	DLL1	-0.0002119	-0.0615204
6	170800020	170800020	rs9460209	C	G	0.297476	0.011914	0.002122	2.02e-08	506022	0.0119707	0.00212163	1.67886e-08	PSB1	5.67e-05	0.0803369
7	141615	141615	rs117495040	A	G	0.02856	0.035461	0.005945	2.53e-09	493772	0.0354191	0.00594397	2.54057e-09	DMP4	-4.19e-05	-0.00181064
7	651147	651147	rs28500790	C	T	0.401491	-0.021645	0.001934	4.96e-29	544025	-0.0217214	0.00193368	2.8021e-29	KAP1	-7.64e-05	0.247998
7	1286567	1286567	rs62435145	T	G	0.690307	-0.036255	0.002167	9.14e-63	500081	-0.0363955	0.00216664	2.51918e-63	UNC4	-0.0001405	0.559687
7	1331159	1331159	rs62436717	T	C	0.204461	0.017711	0.00241	2.1e-13	508096	0.0176519	0.00240961	2.37808e-13	UNC4	-5.91e-05	-0.0540072
7	2517473	2517473	rs11767162	T	C	0.218785	-0.014536	0.002256	1.21e-10	562998	-0.0145828	0.00225564	1.01268e-10	LFNG	-4.68e-05	0.0773131
7	2770067	2770067	rs798531	C	G	0.426572	0.011148	0.001874	2.76e-09	563944	0.0111061	0.0018737	3.07831e-09	AMZ1	-4.19e-05	-0.0474033
7	5625755	5625755	rs10269204	C	T	0.044618	0.029038	0.004704	6.88e-10	510117	0.0286634	0.00470321	1.09823e-09	FSCN1	-0.0003746	-0.203105
7	5694242	5694242	rs112974886	C	T	0.03974	0.026137	0.004704	2.83e-08	563904	0.0257057	0.00470325	4.61536e-08	RN216	-0.0004313	-0.212419
7	6188936	6188936	rs55962331	T	C	0.055629	-0.02362	0.004046	5.45e-09	563940	-0.0233046	0.00404537	8.37146e-09	UBP42	0.0003154	-0.186405
7	6749758	6749758	rs6967414	A	G	0.108657	0.02285	0.002975	1.67e-14	563002	0.0226947	0.0029745	2.35156e-14	ZNF12	-0.0001553	-0.14864
7	12773703	12773703	rs62450572	C	G	0.111442	-0.018385	0.002935	3.86e-10	563944	-0.0184441	0.00293455	3.27497e-10	ARL4A	-5.91e-05	0.07138
7	15060429	15060429	rs10231021	A	T	0.523501	-0.011786	0.001851	1.99e-10	562843	-0.0117786	0.00185071	1.96078e-10	DGKB	7.4e-06	0.00642421
7	21529595	21529595	rs1011167	C	A	0.365421	0.011664	0.001905	9.39e-10	563938	0.0117823	0.00190468	6.17203e-10	SP4	0.0001183	0.182238
7	25420102	25420102	rs74414571	C	G	0.08624	-0.024558	0.003294	9.4e-14	563945	-0.024558	0.00329348	8.88199e-14	NPVF	0	0.0246176
7	27105629	27105629	rs10276952	G	A	0.188651	-0.012989	0.002357	3.64e-08	563946	-0.0132404	0.0023566	1.92712e-08	HXA1	-0.0002514	0.276193
7	36210485	36210485	rs6973373	A	G	0.3081	0.011013	0.002	3.76e-08	562351	0.0110303	0.00199966	3.46695e-08	EEPD1	1.73e-05	0.0352403
7	40913646	40913646	rs6462990	T	C	0.586594	-0.010947	0.001882	6.13e-09	559845	-0.0109248	0.00188167	6.40196e-09	SUCHY	2.22e-05	-0.0188525
7	44809273	44809273	rs1065646	A	G	0.528254	-0.010798	0.00186	6.56e-09	562355	-0.010623	0.00185968	1.11465e-08	ZMIZ2	0.000175	-0.230235
7	50436828	50436828	rs12718730	A	T	0.37389	-0.011433	0.001906	2.06e-09	563946	-0.0113739	0.00190571	2.39713e-09	IKZF1	5.91e-05	-0.0658244
7	80301936	80301936	rs1405747	A	C	0.436425	-0.010997	0.001852	2.96e-09	563004	-0.0110241	0.00185169	2.6242e-09	CD36	-2.71e-05	0.0522948
7	80349532	80349532	rs73134076	G	A	0.171518	0.014343	0.002521	1.31e-08	563945	0.0143529	0.0025206	1.2394e-08	SEM3C	9.9e-06	0.0240598
7	82072276	82072276	rs2214833	G	A	0.399981	-0.010485	0.001874	2.28e-08	562856	-0.0105096	0.0018737	2.03461e-08	CA2D1	-2.46e-05	0.0494537
7	84784020	84784020	rs1019204	C	T	0.39428	-0.01291	0.001889	8.44e-12	560784	-0.0128459	0.00188867	1.0349e-11	SEM3D	6.41e-05	-0.0885559
7	91773213	91773213	rs6465351	T	C	0.520312	0.017089	0.001844	1.99e-20	562363	0.0170594	0.00184371	2.18739e-20	LRRD1	-2.96e-05	-0.0410731
7	93304256	93304256	rs2519565	C	T	0.510699	-0.010617	0.001854	1.04e-08	562854	-0.0107402	0.00185371	6.87642e-09	GBG1	-0.0001232	0.179671
7	97897120	97897120	rs56694862	T	G	0.156844	-0.016521	0.002576	1.47e-10	563003	-0.016691	0.00257559	9.14297e-11	BRI3	-0.00017	0.20623
7	98439250	98439250	rs192172797	T	C	0.003867	-0.095298	0.016124	3.51e-09	555910	-0.0953276	0.0161214	3.35699e-09	TM130	-2.96e-05	0.0193571
7	98750558	98750558	rs141983280	C	T	0.003678	-0.101595	0.017483	6.37e-09	551949	-0.101225	0.0174802	7.00274e-09	SMUF1	0.00037	-0.0411286
7	98948904	98948904	rs10232076	T	C	0.080866	-0.019455	0.003386	9.35e-09	563942	-0.0191199	0.00338542	1.62601e-08	ARC1A	0.0003351	-0.240312
7	99091016	99091016	rs191527346	A	C	0.013809	-0.102731	0.007903	1.36e-38	563944	-0.102085	0.00790176	3.50263e-38	ZN394	0.000646	-0.410855
7	99279844	99279844	rs138582996	T	C	0.00632	-0.14674	0.012954	1.04e-29	562083	-0.146799	0.0129519	8.88804e-30	CP3A5	-5.9e-05	0.0682273
7	99422433	99422433	rs151118513	T	C	0.002679	-0.212416	0.021989	4.76e-22	542082	-0.212032	0.0219855	5.20474e-22	CP343	0.000384	-0.0387921
7	99508425	99508425	rs78082959	C	T	0.000178	-0.951604	0.136043	2.76e-12	407739	-0.950776	0.136031	2.76045e-12	TRIM4	0.000828	-7.08031e-05
7	99591242	99591242	rs62484975	A	G	0.006389	-0.078061	0.012673	7.52e-10	557194	-0.0778614	0.012671	8.00417e-10	ZA2G	0.0001996	-0.0270985
7	99602191	99602191	rs6967487	C	T	0.182767	0.025569	0.002412	3.13e-26	559203	0.0256208	0.00241158	2.3039e-26	ZKSC1	5.18e-05	0.133081
7	99660074	99660074	rs148528096	T	C	0.019534	0.046315	0.007505	6.97e-10	561990	0.0460661	0.00750385	8.30427e-10	ZSC21	-0.0002489	-0.0760687
7	99740363	99740363	rs140600498	G	A	0.01111	-0.067822	0.008991	4.79e-14	562581	-0.0671739	0.00898962	7.87569e-14	LTOR4	0.0006481	-0.215953
7	99760955	99760955	rs185672063	C	G	0.007302	-0.216104	0.011425	9.62e-80	563301	-0.215283	0.0114233	3.16544e-79	G3ST4	0.000821	-0.517259
7	99923063	99923063	rs184562466	T	C	0.007204	-0.141491	0.011205	1.63e-36	560679	-0.141387	0.0112032	1.63236e-36	SPDE3	0.000104	-0.00062834
7	100159121	100159121	rs180873866	A	G	0.005677	0.096926	0.013673	1.41e-12	494874	0.0967141	0.0136708	1.49966e-12	AGFG2	-0.0002119	-0.0267737
7	100190116	100190116	rs2734895	T	C	0.324656	-0.020485	0.002019	3.64e-24	563940	-0.0203544	0.00201869	6.56928e-24	FBX24	0.0001306	-0.256416
7	100218631	100218631	rs41295942	T	C	0.031619	0.042869	0.005383	1.74e-15	562083	0.0426842	0.00538216	2.17955e-15	TFR2	-0.0001848	-0.0978176
7	100225847	100225847	rs139178017	T	C	0.005069	0.177901	0.013674	1.18e-38	500702	0.177761	0.0136718	1.19189e-38	TFR2	-0.00014	-0.00435417
7	100226902	100226902	rs41303501	T	C	0.004972	0.120154	0.014765	4.23e-16	503973	0.120134	0.0147628	4.03094e-16	TFR2	-2e-05	0.020934
7	100306920	100306920	rs182552845	A	G	0.022625	-0.047763	0.006819	2.58e-12	508264	-0.0473515	0.00681789	3.77989e-12	POP7	0.0004115	-0.165859
7	100309180	100309180	rs143593369	G	A	0.00827	-0.2916	0.011683	1.96e-137	505319	-0.291294	0.0116811	2.94045e-137	POP7	0.000306	-0.176158
7	100314474	100314474	rs149823406	T	C	0.008925	-0.120566	0.010467	1.15e-30	554417	-0.12026	0.0104653	1.45856e-30	EPO	0.000306	-0.103226
7	100316975	100316975	rs576236	C	T	0.400665	0.031396	0.001884	2.64e-62	563943	0.0312309	0.0018837	9.79207e-62	EPO	-0.0001651	-0.569271
7	100319633	100319633	rs62483572	A	G	0.005348	-0.281331	0.013225	2.38e-100	557241	-0.281348	0.0132229	1.83941e-100	EPO	-1.7e-05	0.111898
7	100373077	100373077	rs542137	G	C	0.370379	0.025941	0.001916	1.02e-41	562358	0.0258523	0.00191568	1.67059e-41	ZAN	-8.87e-05	-0.21427
7	100437181	100437181	rs150538452	T	C	0.007168	-0.115202	0.012413	1.79e-20	508265	-0.114734	0.012411	2.36341e-20	S12A9	0.000468	-0.120686
7	100551106	100551106	rs62483697	G	A	0.116491	-0.018532	0.003027	9.51e-10	503755	-0.0185714	0.00302648	8.44609e-10	MUC3A	-3.94e-05	0.0515248
7	100770821	100770821	rs73178534	A	G	0.007194	0.071886	0.011796	1.13e-09	557605	0.0720314	0.0117941	1.01262e-09	PAI1	0.0001454	0.0476319
7	100817676	100817676	rs740107	A	G	0.256605	0.014055	0.002099	2.22e-11	563939	0.013917	0.00209868	3.32688e-11	NAT16	-0.000138	-0.175684
7	100985415	100985415	rs150214947	G	T	0.043415	-0.037737	0.004629	3.78e-16	562079	-0.0376606	0.00462828	4.04955e-16	RABL5	7.64e-05	-0.029915
7	101237753	101237753	rs55914958	T	C	0.331809	-0.013704	0.001971	3.71e-12	563928	-0.0136769	0.00197068	3.9162e-12	MYL10	2.71e-05	-0.023491
7	116420558	116420558	rs3807997	A	C	0.191288	0.015049	0.002339	1.29e-10	563003	0.0150465	0.0023386	1.24303e-10	MET	-2.5e-06	0.0161081
7	128784594	128784594	rs36132066	T	A	0.289605	-0.012683	0.002132	2.77e-09	561884	-0.0126855	0.00213166	2.66564e-09	TSN33	-2.5e-06	0.0166783
7	129048940	129048940	rs9690544	C	A	0.273235	0.017332	0.002073	6.59e-17	560444	0.017364	0.00207268	5.40362e-17	SAHH3	3.2e-05	0.0862006
7	129663496	129663496	rs11556924	T	C	0.384498	-0.015833	0.001917	1.56e-16	559197	-0.0156777	0.00191667	2.84557e-16	NIPA	0.0001553	-0.261045
7	131269046	131269046	rs115136484	C	T	0.078916	-0.021882	0.003509	4.65e-10	563003	-0.0218253	0.00350844	4.94637e-10	PODXL	5.67e-05	-0.0268336
7	134659240	134659240	rs2732895	T	C	0.427016	0.012838	0.001951	4.9e-11	561915	0.0129341	0.00195067	3.34297e-11	CALD1	9.61e-05	0.166064
7	150218137	150218137	rs58391005	A	G	0.235467	0.013663	0.002164	2.78e-10	563931	0.0137616	0.00216367	2.01374e-10	GIMA7	9.86e-05	0.140041
7	150498245	150498245	rs114949263	C	T	0.111288	-0.025843	0.00295	2.08e-18	563926	-0.025636	0.00294955	3.57659e-18	T176A	0.000207	-0.235406
7	150755205	150755205	rs2069442	C	G	0.256155	0.017906	0.0022	4.18e-16	510121	0.0177187	0.00219964	7.93062e-16	B3A2	-0.0001873	-0.278131
7	150941609	150941609	rs219230	T	C	0.420608	0.012963	0.001873	4.67e-12	563945	0.013101	0.0018727	2.63784e-12	SMRD3	0.000138	0.248068
7	150952770	150952770	rs61591132	A	G	0.112629	-0.017848	0.002947	1.44e-09	563936	-0.0179367	0.00294653	1.14757e-09	SMRD3	-8.87e-05	0.0985833
7	151403129	151403129	rs2727563	T	C	0.447223	0.031758	0.00193	8.79e-61	559845	0.0317777	0.00192966	6.22814e-61	AAKG2	1.97e-05	0.149631
7	151413194	151413194	rs10224210	C	T	0.279735	-0.065907	0.002067	5.07e-223	563940	-0.0659218	0.00206664	2.83809e-223	AAKG2	-1.48e-05	0.251982
7	151440915	151440915	rs4546566	C	T	0.428018	0.015763	0.001907	1.46e-16	561920	0.0157556	0.00190668	1.416e-16	AAKG2	-7.4e-06	0.0132896
7	151459655	151459655	rs1104838	C	G	0.247249	0.017147	0.002217	1.08e-14	562853	0.0171495	0.00221663	1.01996e-14	AAKG2	2.5e-06	0.0248406
8	651610	651610	rs10105489	G	A	0.241275	-0.012943	0.002183	3.16e-09	547588	-0.0130539	0.00218265	2.221e-09	ERIC1	-0.0001109	0.153139
8	9184231	9184231	rs4240624	G	A	0.090472	0.029064	0.003207	1.35e-19	562860	0.0290443	0.00320644	1.32724e-19	PPR3B	-1.97e-05	0.00738431
8	13211769	13211769	rs1729159	A	G	0.104696	0.017078	0.003024	1.66e-08	562362	0.0170583	0.00302348	1.68152e-08	RHG07	-1.97e-05	-0.00559395
8	23377161	23377161	rs11784090	T	C	0.134336	0.02227	0.002696	1.52e-16	562359	0.0226717	0.00269553	4.07076e-17	MFRN1	0.0004017	0.572168
8	23418122	23418122	rs1567668	A	G	0.429275	-0.011443	0.00186	7.86e-10	563939	-0.0115366	0.0018597	5.52269e-10	MFRN1	-9.36e-05	0.153272
8	23423758	23423758	rs10992	A	G	0.679741	-0.012449	0.001978	3.18e-10	563298	-0.012619	0.00197768	1.76257e-10	MFRN1	-0.00017	0.256281
8	30338513	30338513	rs17627711	A	G	0.231558	0.012924	0.002176	2.96e-09	563942	0.0128599	0.00217563	3.40228e-09	RBPMS	-6.41e-05	-0.0604783
8	32397933	32397933	rs7820676	G	C	0.108061	-0.022251	0.002974	7.61e-14	560785	-0.0221007	0.00297349	1.065e-13	NRG1	0.0001503	-0.145965
8	32446232	32446232	rs59819635	C	A	0.024242	0.036114	0.005995	1.76e-09	563945	0.0357246	0.00599406	2.52226e-09	NRG1	-0.0003894	-0.156277
8	32458572	32458572	rs116834543	G	A	0.007158	0.061901	0.011117	2.64e-08	562361	0.0616349	0.0111152	2.93826e-08	NRG1	-0.0002661	-0.0464863
8	37653172	37653172	rs57023622	A	G	0.197799	-0.014655	0.00236	5.47e-10	563928	-0.0146377	0.00235962	5.52467e-10	GP124	1.73e-05	-0.00431902
8	40045119	40045119	rs6998007	T	C	0.564498	-0.017606	0.00186	3.14e-21	563933	-0.017675	0.0018597	2.01592e-21	CH004	-6.9e-05	0.192456
8	41542093	41542093	rs34265667	A	G	0.033357	0.047488	0.005126	2.08e-20	562360	0.047589	0.0051252	1.61234e-20	ANK1	0.000101	0.110607
8	41630447	41630447	rs4737010	A	G	0.229056	-0.016908	0.002208	1.99e-14	563940	-0.0168316	0.00220764	2.45457e-14	ANK1	7.64e-05	-0.0911223
8	42367068	42367068	rs6474401	C	T	0.384765	-0.025482	0.001895	3.67e-41	563935	-0.0255707	0.00189471	1.65433e-41	S20A2	-8.87e-05	0.346044
8	42368405	42368405	rs35260116	T	A	0.089681	0.020873	0.003236	1.16e-10	563942	0.0207867	0.0032355	1.3223e-10	S20A2	-8.63e-05	-0.056872
8	48125152	48125152	rs141061157	A	C	0.041427	0.02941	0.004673	3.19e-10	562075	0.029235	0.00467226	3.9208e-10	SPIDR	-0.000175	-0.089584
8	48687774	48687774	rs6473736	T	A	0.153187	0.019051	0.002887	4.27e-11	559995	0.0190116	0.00288652	4.50836e-11	PRKDC	-3.94e-05	-0.0235907
8	61176092	61176092	rs7002077	C	A	0.415941	0.012187	0.00187	7.49e-11	561852	0.0121574	0.0018697	7.90814e-11	CAH8	-2.96e-05	-0.0235925
8	63899496	63899496	rs4739033	C	T	0.16806	-0.014846	0.002465	1.76e-09	563005	-0.0147942	0.00246457	1.93982e-09	NKAI3	5.18e-05	-0.0422488
8	76517182	76517182	rs1375647	A	G	0.191821	-0.018239	0.002342	7.22e-15	563943	-0.0183376	0.00234165	4.83767e-15	HNF4G	-9.86e-05	0.173901
8	81300681	81300681	rs2136016	A	G	0.610503	-0.01215	0.00189	1.35e-10	563944	-0.012044	0.00188971	1.84787e-10	ZBT10	0.000106	-0.136338
8	81428717	81428717	rs446001	A	G	0.293249	-0.017607	0.002034	5.06e-18	560785	-0.0173877	0.00203365	1.23084e-17	ZBT10	0.0002193	-0.386051
8	81485611	81485611	rs384026	C	T	0.387448	-0.010517	0.001889	2.64e-08	563940	-0.0105195	0.00188868	2.55124e-08	ZBT10	-2.5e-06	0.0148526
8	81538478	81538478	rs112272342	T	G	0.05776	-0.028182	0.004067	4.38e-12	563943	-0.0280095	0.00406638	5.6554e-12	ZN704	0.0001725	-0.110989
8	92038304	92038304	rs10111737	C	T	0.294701	0.011735	0.002056	1.17e-08	563945	0.0116093	0.00205565	1.62776e-08	TM55A	-0.0001257	-0.143405
8	95635529	95635529	rs55932020	T	C	0.266991	0.012277	0.002108	5.9e-09	562996	0.01224	0.00210767	6.34615e-09	ESRP1	-3.7e-05	-0.0316583
8	95992020	95992020	rs10098778	C	T	0.489766	0.023161	0.001848	5.39e-36	560784	0.0231462	0.00184768	5.303e-36	NDUF6	-1.48e-05	0.00706714
8	96035756	96035756	rs74912350	A	G	0.046398	-0.02549	0.004385	6.31e-09	563004	-0.0256132	0.00438432	5.15775e-09	NDUF6	-0.0001232	0.0875691
8	98664653	98664653	rs2468024	A	G	0.068037	0.020403	0.003663	2.6e-08	563945	0.0204745	0.00366241	2.26504e-08	LYRIC	7.15e-05	0.0598975
8	101247320	101247320	rs1692004	T	C	0.390129	-0.01049	0.001882	2.55e-08	563939	-0.0105467	0.00188167	2.08322e-08	SPAG1	-5.67e-05	0.087805
8	102660580	102660580	rs13262244	A	G	0.560479	0.010553	0.001861	1.46e-08	563945	0.010654	0.00186068	1.02896e-08	GRHL2	0.000101	0.151954
8	103876780	103876780	rs2247355	T	C	0.183122	-0.013994	0.002374	3.85e-09	563942	-0.0139546	0.00237359	4.12532e-09	AZIN1	3.94e-05	-0.0299969
8	116417563	116417563	rs231147	T	C	0.496148	0.014072	0.001857	3.71e-14	558118	0.0142691	0.00185668	1.5264e-14	TRPS1	0.0001971	0.385706
8	116531797	116531797	rs3824200	G	A	0.451046	-0.019864	0.001851	7.69e-27	563938	-0.0201351	0.00185068	1.43858e-27	TRPS1	-0.0002711	0.727992
8	116623548	116623548	rs62512210	C	T	0.083535	0.024965	0.003364	1.22e-13	563003	0.0256402	0.00336348	2.47589e-14	TRPS1	0.0006752	0.692628
8	122662669	122662669	rs3910553	A	G	0.504019	0.010444	0.001838	1.37e-08	563944	0.0104366	0.00183769	1.35316e-08	HYAS2	-7.4e-06	0.00537142
8	125867834	125867834	rs55679363	T	A	0.314695	-0.013428	0.001978	1.17e-11	563940	-0.0134403	0.0019777	1.07609e-11	ZN572	-1.23e-05	0.0363373
8	126369898	126369898	rs2293890	C	G	0.545784	-0.011187	0.001855	1.68e-09	563943	-0.0113472	0.00185468	9.46796e-10	NSE2	-0.0001602	0.249053
8	128972220	128972220	rs67423398	T	C	0.343305	-0.022122	0.001936	3.35e-30	563941	-0.0219988	0.0019357	6.26119e-30	TMM75	0.0001232	-0.271612
8	129060804	129060804	rs2720659	A	G	0.34464	0.015074	0.001936	7.13e-15	559846	0.0150691	0.00193567	6.97466e-15	TMM75	-4.9e-06	0.00956649
8	137057173	137057173	rs1375264	T	G	0.459363	-0.01107	0.001843	1.96e-09	563929	-0.0110084	0.00184268	2.31355e-09	KHDR3	6.16e-05	-0.0720228
9	2520404	2520404	rs7864633	A	G	0.622707	-0.015159	0.001909	2.13e-15	563940	-0.0151836	0.0019087	1.79209e-15	VLDLR	-2.46e-05	0.0750198
9	2622278	2622278	rs2219143	A	G	0.394499	0.022289	0.001991	4.55e-29	545551	0.0223383	0.00199068	3.20002e-29	VLDLR	4.93e-05	0.152859
9	2638823	2638823	rs7044155	T	G	0.361066	0.011297	0.001957	8.05e-09	543346	0.0113561	0.00195666	6.48176e-09	VLDLR	5.91e-05	0.0941029
9	4068002	4068002	rs10758551	A	G	0.312118	0.011305	0.00199	1.38e-08	562360	0.0112631	0.00198966	1.50641e-08	GLIS3	-4.19e-05	-0.0380641
9	4118111	4118111	rs6415788	G	T	0.39567	0.024132	0.001914	2.08e-36	561851	0.0241246	0.00191367	1.94478e-36	GLIS3	-7.4e-06	0.0291929
9	4237546	4237546	rs2224492	G	A	0.332612	0.012689	0.001992	1.94e-10	559703	0.0127432	0.00199166	1.57113e-10	GLIS3	5.42e-05	0.0915896
9	6356657	6356657	rs7021445	C	T	0.051458	-0.038439	0.004173	3.45e-20	560788	-0.0387249	0.00417228	1.6717e-20	TPD55	-0.0002859	0.314661
9	13555074	13555074	rs13294011	A	G	0.178291	-0.017203	0.002408	9.48e-13	560785	-0.0172005	0.00240759	9.04495e-13	MPDZ	2.5e-06	0.0204022
9	13976285	13976285	rs17278406	A	G	0.301546	-0.033745	0.002013	5.06e-63	563004	-0.0336735	0.00201266	7.80958e-63	NFIB	7.15e-05	-0.188477
9	13981423	13981423	rs75569334	A	G	0.056364	0.02498	0.004059	7.77e-10	546642	0.0250367	0.00405835	6.86448e-10	NFIB	5.67e-05	0.0538134
9	20551460	20551460	rs17685306	G	C	0.210933	-0.014426	0.002261	1.84e-10	563942	-0.0144014	0.00226061	1.8835e-10	AF9	2.46e-05	-0.0101478
9	32424893	32424893	rs10813814	A	G	0.247102	-0.015543	0.00217	8.3e-13	561277	-0.0155504	0.00216963	7.64868e-13	ACOC	-7.4e-06	0.0354916
9	32450187	32450187	rs12985	C	T	0.374778	0.018929	0.001909	3.75e-23	562359	0.0189881	0.0019087	2.56828e-23	ACOC	5.91e-05	0.164389
9	32455262	32455262	rs7045087	C	T	0.29873	-0.019266	0.002011	1.01e-21	562358	-0.0193424	0.00201069	6.59654e-22	DDX58	-7.64e-05	0.185005
9	32576229	32576229	rs146870654	T	A	0.006732	0.081456	0.012826	2.21e-10	558577	0.081281	0.012824	2.32452e-10	NDUB6	-0.000175	-0.021941
9	33116941	33116941	rs12352863	C	G	0.188291	-0.015527	0.002373	6.24e-11	563942	-0.0154038	0.00237262	8.45289e-11	B4GT1	0.0001232	-0.131821
9	33778629	33778629	rs2790732	C	T	0.28673	-0.012073	0.002035	3.08e-09	563944	-0.0120163	0.00203465	3.50873e-09	TRY3	5.67e-05	-0.0565992
9	71153062	71153062	rs398222	G	A	0.133991	-0.015601	0.002771	1.85e-08	548139	-0.0154457	0.00277052	2.4748e-08	TM252	0.0001553	-0.126368
9	71830308	71830308	rs2309426	G	T	0.383681	-0.010673	0.001926	3.05e-08	545578	-0.0107469	0.00192567	2.39316e-08	ZO2	-7.39e-05	0.105328
9	73121298	73121298	rs7037072	G	A	0.543777	0.012295	0.001876	5.76e-11	547494	0.012332	0.00187568	4.87586e-11	TRPM3	3.7e-05	0.0723713
9	79779590	79779590	rs4602959	G	T	0.496139	-0.011201	0.001862	1.85e-09	549056	-0.0112528	0.0018617	1.50032e-09	VP13A	-5.18e-05	0.0909878
9	80834173	80834173	rs878922	A	G	0.499055	-0.010693	0.001855	8.4e-09	560784	-0.0108704	0.00185468	4.59871e-09	CEP78	-0.0001774	0.261643
9	86632743	86632743	rs12004444	A	G	0.138878	0.015011	0.00267	1.94e-08	563935	0.0151613	0.00266959	1.35266e-08	RMI1	0.0001503	0.156613
9	92263349	92263349	rs11265853	G	A	0.736448	0.013837	0.002097	4.27e-11	560774	0.0138863	0.00209664	3.51691e-11	GA45G	4.93e-05	0.0842666
9	93801208	93801208	rs2184540	A	G	0.234038	0.016877	0.002188	1.29e-14	563002	0.0168573	0.00218765	1.30158e-14	KSYK	-1.97e-05	-0.00388116
9	97355470	97355470	rs2987900	G	A	0.070952	-0.021548	0.003585	1.89e-09	559205	-0.021617	0.0035844	1.63085e-09	F16P2	-6.9e-05	0.0640478
9	97935646	97935646	rs147765058	T	C	0.016177	-0.045963	0.007458	7.36e-10	561935	-0.0455835	0.00745681	9.7775e-10	FANCC	0.0003795	-0.12335
9	98303429	98303429	rs28453815	A	T	0.32956	-0.012567	0.001965	1.65e-10	563930	-0.0126163	0.00196469	1.34914e-10	PTC1	-4.93e-05	0.0874269
9	107782747	107782747	rs138535374	G	C	0.11072	0.019492	0.002952	4.18e-11	562510	0.0196522	0.00295153	2.77e-11	ABCA1	0.0001602	0.178697
9	109620811	109620811	rs12343333	C	T	0.299255	0.01191	0.002012	3.29e-09	563943	0.0121441	0.00201169	1.57221e-09	ZN462	0.0002341	0.320685
9	111968954	111968954	rs10739273	C	G	0.37204	0.011231	0.001918	4.9e-09	563943	0.0113099	0.00191767	3.68615e-09	E41LB	7.89e-05	0.123623
9	114807251	114807251	rs12338617	A	C	0.093736	-0.0201	0.003153	1.88e-10	563943	-0.020132	0.00315246	1.70128e-10	SUSD1	-3.2e-05	0.0433821
9	114852933	114852933	rs35593442	A	G	0.148202	-0.022439	0.002584	4.02e-18	563944	-0.0224439	0.0025836	3.71877e-18	SUSD1	-4.9e-06	0.0338267
9	114945705	114945705	rs10759531	G	A	0.528612	0.015434	0.001844	6e-17	563936	0.0155153	0.00184371	3.91972e-17	SUSD1	8.13e-05	0.184896
9	115593729	115593729	rs1539339	C	A	0.287685	-0.01409	0.002026	3.7e-12	562359	-0.0140382	0.00202566	4.20176e-12	SNX30	5.18e-05	-0.0552295
9	116349298	116349298	rs10981835	A	G	0.147947	-0.023483	0.002612	2.63e-19	559200	-0.0236333	0.00261155	1.43581e-19	RGS3	-0.0001503	0.262859
9	124039871	124039871	rs4837827	T	C	0.460158	-0.011681	0.001853	2.97e-10	560784	-0.0117328	0.00185268	2.40677e-10	GELS	-5.18e-05	0.0913219
9	130588091	130588091	rs41322046	T	C	0.017011	-0.045892	0.007258	2.65e-10	562387	-0.0458871	0.00725684	2.56065e-10	EGLN	4.9e-06	0.0148957
9	130607359	130607359	rs41492548	A	G	0.23681	0.012812	0.002324	3.6e-08	508097	0.012849	0.00232362	3.20744e-08	EGLN	3.7e-05	0.050144
9	130629139	130629139	rs913987	T	G	0.175205	0.039017	0.002557	1.59e-52	504293	0.038948	0.00255655	2.08335e-52	KAD1	-6.9e-05	-0.117365
9	131465481	131465481	rs13283282	G	C	0.144965	0.016567	0.002757	1.92e-09	510117	0.0165818	0.00275655	1.79417e-09	PKN3	1.48e-05	0.0294376
9	131841887	131841887	rs10819461	C	T	0.279268	-0.015514	0.002086	1.07e-13	562358	-0.0154795	0.00208564	1.15417e-13	DOPP1	3.45e-05	-0.032886
9	133464331	133464331	rs73547971	T	C	0.112214	0.015997	0.002922	4.48e-08	563001	0.0160734	0.00292154	3.76169e-08	FUBP3	7.64e-05	0.075895
9	135851114	135851114	rs11243967	C	A	0.019535	0.046227	0.006948	2.97e-11	563006	0.0462221	0.00694695	2.86046e-11	GFI1B	-4.9e-06	0.0163206
9	135868586	135868586	rs113257865	A	C	0.063546	0.023261	0.003902	2.57e-09	563941	0.0233399	0.00390138	2.19793e-09	GFI1B	7.89e-05	0.0679193
9	136036115	136036115	rs34813452	A	G	0.078403	-0.022117	0.003532	3.92e-10	563942	-0.0222525	0.00353144	2.95218e-10	GBGT1	-0.0001355	0.123143
9	136042866	136042866	rs11244018	G	C	0.34301	0.015899	0.001952	3.93e-16	563945	0.0159384	0.00195167	3.1726e-16	GBGT1	3.94e-05	0.0929772
9	136050925	136050925	rs138179558	C	T	0.006375	0.0859	0.011809	3.63e-13	560133	0.0861538	0.0118071	2.94731e-13	GBGT1	0.0002538	0.0904808
9	136106974	136106974	rs71503180	A	G	0.080649	0.024031	0.00343	2.56e-12	562528	0.0242553	0.00342945	1.52026e-12	OBP2B	0.0002243	0.226322
9	136123092	136123092	rs11244049	C	T	0.065483	0.075762	0.003779	2.35e-89	562526	0.0758507	0.00377839	1.22387e-89	OBP2B	8.87e-05	0.283333
9	136149830	136149830	rs532436	A	G	0.186068	-0.077982	0.002369	1.37e-237	562361	-0.0781274	0.00236864	1.37218e-238	SURF6	-0.0001454	0.999309
9	136155127	136155127	rs13298002	A	G	0.068678	-0.02347	0.00364	1.17e-10	563941	-0.0235267	0.00363936	1.01632e-10	SURF6	-5.67e-05	0.0611554
9	136209319	136209319	rs7870707	C	A	0.23135	-0.021026	0.002258	1.35e-20	562358	-0.0210285	0.00225761	1.22574e-20	MED22	-2.5e-06	0.0419354
9	136340200	136340200	rs2073935	T	G	0.275764	-0.032532	0.002165	5.6e-51	509480	-0.0326084	0.00216464	2.78868e-51	GTR6	-7.64e-05	0.302789
9	136377711	136377711	rs186365095	T	C	0.008933	-0.076183	0.013371	1.25e-08	493617	-0.0763185	0.0133688	1.13837e-08	TMM8C	-0.0001355	0.0406266
9	136389390	136389390	rs2073871	A	G	0.271187	0.017091	0.002208	1.03e-14	509179	0.0169974	0.00220764	1.36781e-14	TMM8C	-9.36e-05	-0.123189
9	136826457	136826457	rs2073829	G	A	0.334354	0.016464	0.002068	1.76e-15	508538	0.0164936	0.00206764	1.49916e-15	VAV2	2.96e-05	0.0696647
9	137245533	137245533	rs12347354	C	T	0.234776	0.014789	0.00228	9.11e-11	510121	0.0147791	0.0022796	8.97887e-11	RXRA	-9.9e-06	0.00629669
10	3245548	3245548	rs7916396	T	C	0.560746	-0.011002	0.001867	3.87e-09	563000	-0.0111474	0.0018667	2.34786e-09	PREP	-0.0001454	0.217039
10	3791224	3791224	rs10904089	G	T	0.506706	-0.014528	0.001878	1.09e-14	562358	-0.0145231	0.00187768	1.03727e-14	KLF6	4.9e-06	0.0215347
10	4490010	4490010	rs1679426	G	A	0.15783	0.016155	0.002551	2.49e-10	547590	0.0161476	0.00255056	2.43563e-10	AKCL2	-7.4e-06	0.00958803
10	5246085	5246085	rs17134531	A	G	0.152399	0.021655	0.002562	3e-17	560787	0.0214825	0.00256156	5.00939e-17	AK1C4	-0.0001725	-0.222664
10	8088654	8088654	rs263424	G	C	0.205476	0.014175	0.002311	8.88e-10	560444	0.0143278	0.00231064	5.61802e-10	GATA3	0.0001528	0.19883
10	13536073	13536073	rs11258418	A	C	0.335603	0.014185	0.001949	3.55e-13	563942	0.0141702	0.00194867	3.5486e-13	BEND7	-1.48e-05	0.000171305
10	13737768	13737768	rs11258533	T	C	0.455271	0.016455	0.001874	1.75e-18	562857	0.016354	0.0018737	2.58837e-18	FRM4A	-0.000101	-0.169988
10	24857778	24857778	rs12569671	T	G	0.222424	-0.012368	0.002215	2.42e-08	561455	-0.0123606	0.00221465	2.38753e-08	RHG21	7.4e-06	0.00586653
10	28977010	28977010	rs655766	T	C	0.278449	-0.011468	0.002051	2.3e-08	560787	-0.011431	0.00205065	2.48457e-08	BAMBI	3.7e-05	-0.0335234
10	31163237	31163237	rs117887587	T	C	0.080491	-0.020173	0.003462	5.79e-09	563940	-0.0201681	0.00346146	5.6614e-09	ZN438	4.9e-06	0.00975472
10	35440293	35440293	rs80022969	A	G	0.174497	0.013386	0.002426	3.5e-08	561852	0.0133441	0.00242562	3.76952e-08	CREM	-4.19e-05	-0.032218
10	36385531	36385531	rs10827597	T	C	0.600168	0.014129	0.001884	6.61e-14	560787	0.0142374	0.00188367	4.08275e-14	FZD8	0.0001084	0.209249
10	37693541	37693541	rs2505689	T	G	0.209035	0.012409	0.002271	4.77e-08	562848	0.0124731	0.00227065	3.94788e-08	AN30A	6.41e-05	0.0821544
10	39033627	39033627	rs10870372	T	C	0.450038	0.010564	0.001871	1.68e-08	556698	0.0105467	0.0018707	1.72176e-08	ZN37A	-1.73e-05	-0.0106633
10	44046172	44046172	rs3006381	C	T	0.337972	0.011224	0.001944	7.91e-09	559701	0.0113595	0.00194368	5.08552e-09	ZN239	0.0001355	0.191841
10	44858681	44858681	rs10900027	A	C	0.278056	0.022189	0.002112	8.74e-26	561908	0.0221989	0.00211167	7.56931e-26	SDF1	9.9e-06	0.0624551
10	45388231	45388231	rs10793565	C	G	0.582797	-0.012993	0.001891	6.69e-12	562857	-0.0129831	0.00189067	6.55911e-12	TMM72	9.9e-06	0.0085812
10	46042573	46042573	rs1982796	A	G	0.308317	0.014925	0.001998	8.27e-14	563945	0.0150014	0.00199766	5.93674e-14	MARH8	7.64e-05	0.143957
10	48411796	48411796	rs34130368	T	G	0.116112	-0.026623	0.002957	2.35e-19	563005	-0.0264751	0.00295653	3.40316e-19	GDF2	0.0001479	-0.160815
10	60274606	60274606	rs7897298	T	C	0.53942	-0.017332	0.001844	5.71e-21	562362	-0.0174158	0.00184368	3.51393e-21	BICC1	-8.38e-05	0.210843
10	61205376	61205376	rs139249278	C	T	0.029425	0.030114	0.005455	3.47e-08	563946	0.0298676	0.00545415	4.34767e-08	FA13C	-0.0002464	-0.0979271
10	61469538	61469538	rs1171614	T	C	0.229862	-0.014175	0.002205	1.33e-10	562999	-0.0141109	0.00220463	1.54777e-10	MOT9	6.41e-05	-0.0658548
10	70210098	70210098	rs116910421	A	G	0.003601	0.097973	0.015955	8.47e-10	551896	0.0983525	0.0159524	7.03227e-10	DNA2	0.0003795	0.0807879
10	71001110	71001110	rs7918272	G	C	0.484528	-0.023807	0.001875	7e-37	563000	-0.0237971	0.00187468	6.38385e-37	HKDC1	9.9e-06	0.0400154
10	71062762	71062762	rs4746839	G	A	0.076222	0.057503	0.003571	2.74e-58	560788	0.0576114	0.00357038	1.42625e-58	HXK1	0.0001084	0.283555
10	71066088	71066088	rs180855455	T	C	0.00888	0.0822	0.010127	5.02e-16	563261	0.0821901	0.0101254	4.77066e-16	HXK1	-9.9e-06	0.0221253
10	71085215	71085215	rs146238378	A	G	0.005927	0.098951	0.012749	8.8e-15	555686	0.0983398	0.0127469	1.21167e-14	HXK1	-0.0006112	-0.138902
10	71151084	71151084	rs145864791	A	G	0.003441	0.093701	0.01688	2.91e-08	549922	0.0935556	0.0168773	2.96854e-08	HXK1	-0.0001454	-0.00864992
10	77295957	77295957	rs9415106	G	A	0.284375	-0.013795	0.002041	1.45e-11	563943	-0.0140365	0.00204065	6.05112e-12	CJ011	-0.0002415	0.379532
10	77938242	77938242	rs4746372	G	A	0.757742	-0.016847	0.002165	7.55e-15	562360	-0.0168445	0.00216462	7.15296e-15	CJ011	2.5e-06	0.0234612
10	80787846	80787846	rs12783396	C	T	0.239878	-0.011785	0.002155	4.66e-08	563941	-0.0117653	0.00215467	4.75183e-08	ZMIZ1	1.97e-05	-0.00847498
10	81321104	81321104	rs17880372	G	T	0.067705	-0.022808	0.003877	4.15e-09	507341	-0.0225074	0.00387635	6.38578e-09	SFPA2	0.0003006	-0.187166
10	82164090	82164090	rs35436409	T	G	0.13373	-0.018742	0.002827	3.49e-11	508618	-0.018641	0.00282654	4.25311e-11	F213A	0.000101	-0.0858812
10	88949045	88949045	rs6586063	A	G	0.151684	-0.019841	0.00262	3.78e-14	563946	-0.019873	0.00261959	3.2911e-14	FA35A	-3.2e-05	0.0601507
10	90296467	90296467	rs2576159	T	A	0.318234	0.013759	0.001975	3.39e-12	563941	0.0137812	0.00197466	2.97257e-12	RNLS	2.22e-05	0.0570676
10	91003419	91003419	rs1332329	C	A	0.345996	-0.010965	0.00193	1.38e-08	563927	-0.0110143	0.0019297	1.1446e-08	LICH	-4.93e-05	0.0812253
10	91395428	91395428	rs1359624	C	T	0.260476	-0.012773	0.002123	1.83e-09	559203	-0.0129603	0.00212263	1.02309e-09	PANK1	-0.0001873	0.252537
10	92817552	92817552	rs11814249	A	G	0.081817	0.019933	0.003358	3e-09	560787	0.0198837	0.00335742	3.17449e-09	ANKR1	-4.93e-05	-0.0245527
10	93037409	93037409	rs2631676	G	A	0.188969	-0.016265	0.002358	5.48e-12	562859	-0.016021	0.0023576	1.07947e-11	PCGF5	0.000244	-0.29443
10	94395393	94395393	rs10736069	T	C	0.396436	0.01072	0.001899	1.69e-08	563944	0.0108728	0.00189866	1.02496e-08	KIF11	0.0001528	0.21718
10	96453099	96453099	rs2901783	G	A	0.213805	-0.012956	0.002244	7.91e-09	561201	-0.0129511	0.00224364	7.81797e-09	CP2CI	4.9e-06	0.00508248
10	96999873	96999873	rs7910217	A	G	0.320646	0.01302	0.001968	3.8e-11	563945	0.0130126	0.0019677	3.7636e-11	PDLI1	-7.4e-06	0.00418014
10	97289617	97289617	rs7092561	C	G	0.16832	-0.015621	0.002458	2.16e-10	563941	-0.0157319	0.00245761	1.54055e-10	SRBS1	-0.0001109	0.146778
10	104670832	104670832	rs28606370	A	C	0.34092	-0.014485	0.001947	1.07e-13	560444	-0.0147659	0.00194669	3.32128e-14	CNNM2	-0.0002809	0.508078
10	114708510	114708510	rs3814570	T	C	0.286175	0.012328	0.002044	1.66e-09	562362	0.0123847	0.00204365	1.36058e-09	TF7L2	5.67e-05	0.086384
10	119386122	119386122	rs181669	T	C	0.461282	-0.011232	0.001854	1.4e-09	558116	-0.0110989	0.00185368	2.13085e-09	EMX2	0.0001331	-0.182425
10	119565561	119565561	rs17560483	G	C	0.557042	-0.010841	0.001876	7.71e-09	559700	-0.0108435	0.00187568	7.42151e-09	RFIP2	-2.5e-06	0.0165621
10	126498852	126498852	rs10901825	C	T	0.240967	0.013692	0.002158	2.29e-10	563946	0.0137635	0.00215766	1.78369e-10	F175B	7.15e-05	0.108516
10	126685916	126685916	rs12414708	A	G	0.459476	-0.011504	0.001884	1.05e-09	562853	-0.0111812	0.0018837	2.92486e-09	CTBP2	0.0003228	-0.444916
11	308290	308290	rs1058900	T	C	0.432231	-0.012243	0.002016	1.29e-09	502876	-0.0122356	0.00201566	1.2769e-09	IFM2	7.4e-06	0.00443282
11	1689461	1689461	rs34011530	G	C	0.16856	-0.015843	0.002607	1.26e-09	510121	-0.0157962	0.00260658	1.36016e-09	KRA56	4.68e-05	-0.0332195
11	1874221	1874221	rs907612	T	C	0.380254	-0.012054	0.002005	1.9e-09	509136	-0.012091	0.00200467	1.62559e-09	LSP1	-3.7e-05	0.0677426
11	2190591	2190591	rs7482510	G	C	0.20673	0.018033	0.002438	1.47e-13	510111	0.0181636	0.0024376	9.23317e-14	TY3H	0.0001306	0.201967
11	2325427	2325427	rs61744929	C	T	0.017943	0.045039	0.007196	3.99e-10	540795	0.0448788	0.00719482	4.44173e-10	TSN32	-0.0001602	-0.0465793
11	3036324	3036324	rs739401	T	C	0.497321	0.010635	0.001853	9.66e-09	559200	0.0107952	0.00185268	5.65047e-09	SYCC	0.0001602	0.232893
11	6673013	6673013	rs10742977	G	T	0.367993	0.012477	0.001917	7.89e-11	558762	0.012477	0.00191667	7.52952e-11	PCD16	0	0.0203097
11	8388022	8388022	rs4447164	T	C	0.07472	-0.019791	0.00351	1.77e-08	563001	-0.0196875	0.0035094	2.02414e-08	STK33	0.0001035	-0.0582673
11	8738532	8738532	rs871676	G	C	0.299578	0.0123	0.002058	2.33e-09	563004	0.0122482	0.00205767	2.64113e-09	ST5	-5.18e-05	-0.0544339
11	8876852	8876852	rs2742552	C	T	0.493401	-0.026828	0.001846	8.41e-48	562358	-0.026796	0.00184568	9.29464e-48	ST5	3.2e-05	-0.0434366
11	9002477	9002477	rs2568044	T	C	0.225144	0.018484	0.002208	6.06e-17	563946	0.0185086	0.00220764	5.12016e-17	NRIP3	2.46e-05	0.0731891
11	9235473	9235473	rs9666585	G	A	0.037839	-0.028605	0.00486	4.07e-09	563000	-0.0285508	0.00485915	4.21131e-09	DEN5A	5.42e-05	-0.0148228
11	9927580	9927580	rs12361732	C	T	0.133233	0.024587	0.002757	4.98e-19	563943	0.0244391	0.00275656	7.59474e-19	MTMRD	-0.0001479	-0.183284
11	9929470	9929470	rs74553374	C	T	0.102118	-0.026083	0.00305	1.29e-17	563005	-0.0261348	0.00304951	1.03359e-17	MTMRD	-5.18e-05	0.0962414
11	10043688	10043688	rs72858816	G	A	0.00946	-0.05506	0.009909	2.82e-08	546951	-0.0551512	0.00990744	2.59691e-08	MTMRD	-9.12e-05	0.0357922
11	10178437	10178437	rs59901009	C	T	0.245387	-0.041074	0.002141	5.72e-82	563944	-0.0410839	0.00214066	4.30621e-82	MTMRD	-9.9e-06	0.123301
11	10361731	10361731	rs2923095	G	C	0.4772	-0.016823	0.001859	1.52e-19	562857	-0.0168674	0.0018587	1.13895e-19	AMPD3	-4.44e-05	0.125339
11	10373076	10373076	rs182264490	C	G	0.005269	0.092257	0.01412	6.64e-11	540482	0.0925133	0.0141177	5.63963e-11	AMPD3	0.0002563	0.0709175
11	10389394	10389394	rs11042756	A	G	0.131412	-0.016726	0.00277	1.6e-09	563943	-0.0167161	0.00276956	1.58297e-09	AMPD3	9.9e-06	0.0046473
11	10507646	10507646	rs12419888	T	C	0.45825	0.011977	0.001875	1.74e-10	563001	0.0120164	0.00187468	1.45644e-10	AMPD3	3.94e-05	0.0772567
11	10508903	10508903	rs117706710	T	G	0.009302	-0.0773	0.009828	3.85e-15	562361	-0.0772482	0.00982646	3.8033e-15	AMPD3	5.18e-05	0.00530015
11	10676987	10676987	rs2098839	T	C	0.329271	-0.017454	0.001993	2.13e-18	543493	-0.0174713	0.00199265	1.82104e-18	MRVI1	-1.73e-05	0.0680601
11	16259405	16259405	rs1949481	T	C	0.538408	0.010652	0.001859	1.03e-08	561277	0.0106643	0.00185868	9.60403e-09	SOX6	1.23e-05	0.0303837
11	27618490	27618490	rs11030066	T	C	0.14082	-0.015455	0.002644	5.22e-09	559846	-0.0161228	0.00264354	1.06769e-09	BDNF	-0.0006678	0.689225
11	27643725	27643725	rs11030084	T	C	0.186026	0.014258	0.002356	1.48e-09	563941	0.0152363	0.0023556	9.92183e-11	BDNF	0.0009783	1.17367
11	30749450	30749450	rs10488799	C	T	0.113872	-0.016132	0.002898	2.67e-08	563944	-0.0161911	0.00289751	2.29755e-08	DCDC1	-5.91e-05	0.0652463
11	30754837	30754837	rs55733296	A	G	0.038129	-0.061977	0.00486	3.32e-37	562088	-0.062216	0.00485925	1.5646e-37	DCDC1	-0.000239	0.326735
11	30771782	30771782	rs12419067	A	G	0.162843	-0.021366	0.002602	2.32e-16	563936	-0.0212921	0.00260159	2.7402e-16	DCDC1	7.39e-05	-0.0722943
11	30951674	30951674	rs163879	C	T	0.326903	-0.022607	0.001965	1.39e-30	563945	-0.0225996	0.00196467	1.27427e-30	DCDC1	7.4e-06	0.0377533
11	31517087	31517087	rs1223110	T	C	0.192008	-0.023432	0.002379	7.38e-23	563941	-0.0233457	0.00237863	9.72552e-23	IMP1L	8.63e-05	-0.119856
11	34653771	34653771	rs17358295	G	T	0.106985	-0.016498	0.002997	3.78e-08	562362	-0.016567	0.00299649	3.22424e-08	EHF	-6.9e-05	0.0690644
11	47380593	47380593	rs3740689	A	G	0.585056	0.013812	0.001888	2.67e-13	561916	0.0137208	0.00188767	3.6305e-13	SPI1	-9.12e-05	-0.133455
11	47974373	47974373	rs1631174	A	C	0.336035	-0.012265	0.001947	3.08e-10	562855	-0.0121861	0.00194669	3.8517e-10	PTPRJ	7.89e-05	-0.0971017
11	60962234	60962234	rs181042109	C	T	0.018917	-0.045407	0.007687	3.58e-09	508704	-0.0452616	0.00768574	3.88456e-09	PEPA3	0.0001454	-0.0354588
11	61605499	61605499	rs174578	A	T	0.351324	0.030728	0.00193	4.9e-57	563935	0.0306689	0.00192966	7.04303e-57	FADS2	-5.91e-05	-0.157563
11	61630104	61630104	rs174621	A	G	0.226809	0.025556	0.002251	7.53e-30	562997	0.0255018	0.00225064	9.226e-30	FADS2	-5.42e-05	-0.0882185
11	61669608	61669608	rs174470	A	G	0.164527	0.020938	0.002531	1.37e-16	563940	0.0208123	0.00253059	1.96317e-16	R3GEF	-0.0001257	-0.156237
11	64023752	64023752	rs599908	G	C	0.30785	-0.011327	0.002039	2.86e-08	563940	-0.011428	0.00203868	2.07522e-08	PLCB3	-0.000101	0.139302
11	67182383	67182383	rs1115051	G	A	0.067527	-0.020801	0.003783	3.93e-08	563698	-0.0208478	0.00378238	3.55115e-08	PP1A	-4.68e-05	0.0440235
11	74040994	74040994	rs3867269	C	G	0.508093	0.01167	0.001837	2.18e-10	563944	0.0115813	0.00183669	2.87203e-10	PGM2L	-8.87e-05	-0.119732
11	74271172	74271172	rs12802128	T	C	0.102191	-0.022201	0.00305	3.51e-13	563002	-0.0223168	0.00304951	2.51393e-13	DPOD3	-0.0001158	0.144954
11	75454878	75454878	rs498936	A	T	0.160693	0.021848	0.002498	2.34e-18	563942	0.0217864	0.00249756	2.70787e-18	MOGT2	-6.16e-05	-0.063412
11	84771599	84771599	rs592063	T	A	0.362393	0.011008	0.00192	1e-08	562857	0.0107123	0.0019197	2.40267e-08	DLG2	-0.0002957	-0.380694
11	95795807	95795807	rs12800440	T	C	0.235408	-0.014323	0.002223	1.2e-10	559200	-0.0143871	0.00222262	9.60684e-11	MAML2	-6.41e-05	0.0966007
11	95928212	95928212	rs12788404	T	C	0.291505	0.014466	0.00204	1.37e-12	562360	0.0145079	0.00203965	1.13609e-12	MAML2	4.19e-05	0.0813078
11	111215664	111215664	rs7117229	A	G	0.461902	0.01656	0.001844	2.87e-19	562363	0.0165526	0.00184368	2.75717e-19	OBF1	-7.4e-06	0.0174184
11	117267884	117267884	rs573455	G	A	0.535068	0.012339	0.001847	2.48e-11	561921	0.0121271	0.00184668	5.13485e-11	CE164	-0.0002119	-0.316076
11	118135973	118135973	rs12798851	G	T	0.13502	-0.015877	0.002724	5.77e-09	563002	-0.0158992	0.00272357	5.29501e-09	MPZL2	-2.22e-05	0.037309
11	118298252	118298252	rs4456287	C	T	0.216891	-0.016409	0.002239	2.42e-13	560786	-0.0163449	0.00223861	2.84851e-13	ATP5L	6.41e-05	-0.0708024
11	118312870	118312870	rs74422681	G	A	0.063303	-0.023012	0.003857	2.5e-09	563005	-0.023113	0.0038564	2.05462e-09	KMT2A	-0.000101	0.0852085
12	2421588	2421588	rs2108570	A	G	0.209478	-0.016291	0.002297	1.36e-12	544926	-0.0162269	0.0022966	1.59905e-12	CAC1C	6.41e-05	-0.0703231
12	2521812	2521812	rs17223841	G	A	0.370688	0.027756	0.001909	7.31e-48	562358	0.0275934	0.00190868	2.27124e-47	CAC1C	-0.0001626	-0.492346
12	2671735	2671735	rs74460986	T	A	0.080979	0.019058	0.003416	2.47e-08	563005	0.0188485	0.00341546	3.41721e-08	CAC1C	-0.0002095	-0.140975
12	3218584	3218584	rs61916264	G	A	0.165176	-0.013769	0.002499	3.67e-08	562992	-0.0138208	0.00249861	3.1773e-08	TSN9	-5.18e-05	0.0626078
12	4331204	4331204	rs11615482	A	C	0.212068	-0.021064	0.002254	9.81e-21	563939	-0.0210024	0.00225364	1.17094e-20	CCND2	6.16e-05	-0.0768656
12	11830518	11830518	rs2724625	C	G	0.031752	-0.036408	0.00528	5.58e-12	563945	-0.0364031	0.00527908	5.35922e-12	ETV6	4.9e-06	0.0175326
12	13046211	13046211	rs12811512	T	C	0.152009	-0.031266	0.002569	4.99e-34	563938	-0.0311921	0.0025686	6.20439e-34	RAI3	7.39e-05	-0.0945985
12	15305000	15305000	rs3748301	C	A	0.312563	-0.014648	0.002	2.53e-13	560787	-0.0147367	0.00199966	1.71141e-13	RERG	-8.87e-05	0.169766
12	21709554	21709554	rs10841848	A	G	0.203495	-0.016142	0.002291	1.93e-12	560787	-0.0161395	0.00229061	1.84178e-12	GYS2	2.5e-06	0.0203196
12	24156829	24156829	rs11047198	T	A	0.539336	0.013086	0.001866	2.43e-12	563938	0.0130885	0.0018657	2.29454e-12	SOX5	2.5e-06	0.0249106
12	24195042	24195042	rs11047224	C	G	0.036647	-0.029502	0.004903	1.83e-09	563945	-0.0295291	0.00490219	1.70522e-09	SOX5	-2.71e-05	0.0306707
12	46199589	46199589	rs1863127	T	C	0.490647	-0.012031	0.001624	1.32e-13	563943	-0.0121936	0.00162379	5.94109e-14	ARID2	-0.0001626	0.346708
12	48506536	48506536	rs139499448	A	G	0.010249	-0.052717	0.008802	2.17e-09	563943	-0.052887	0.00880071	1.86202e-09	K6PF	-0.00017	0.0664754
12	48512285	48512285	rs4760682	C	A	0.18714	0.035427	0.002042	2.22e-67	563945	0.0353802	0.00204176	2.88042e-67	K6PF	-4.68e-05	-0.113103
12	48752056	48752056	rs9788082	A	C	0.220215	-0.021791	0.001931	1.69e-29	563945	-0.0217565	0.00193076	1.88045e-29	ZN641	3.45e-05	-0.0463751
12	48777719	48777719	rs55817352	A	G	0.087108	0.021656	0.002939	1.8e-13	563941	0.0215599	0.00293864	2.18921e-13	ZN641	-9.61e-05	-0.0850149
12	49146655	49146655	rs148967402	A	G	0.019958	0.041083	0.006369	1.15e-10	563928	0.040701	0.00636808	1.64355e-10	ADCY6	-0.000382	-0.155085
12	52241706	52241706	rs303782	T	C	0.467147	0.011329	0.001856	1.07e-09	561909	0.0114005	0.00185568	8.06981e-10	SCN8A	7.15e-05	0.12252
12	52318378	52318378	rs3847858	T	A	0.113786	0.023914	0.002894	1.49e-16	563942	0.0237193	0.00289351	2.45584e-16	ACVL1	-0.0001947	-0.217014
12	52327542	52327542	rs143362810	G	A	0.021695	-0.037057	0.006355	5.64e-09	562404	-0.0371112	0.00635401	5.20131e-09	ACVL1	-5.42e-05	0.0351664
12	53777171	53777171	rs3741651	G	A	0.172178	0.014377	0.002434	3.6e-09	562999	0.0141256	0.00243358	6.45696e-09	SP1	-0.0002514	-0.253726
12	54593010	54593010	rs7966201	C	T	0.312761	0.014252	0.002017	1.64e-12	563941	0.0142224	0.00201665	1.75726e-12	SMUG1	-2.96e-05	-0.0299922
12	56918834	56918834	rs4759247	G	T	0.483362	0.011545	0.001842	3.74e-10	561852	0.0115598	0.00184168	3.45732e-10	RBMS2	1.48e-05	0.034132
12	57779821	57779821	rs4108243	G	A	0.481762	0.011523	0.00184	3.91e-10	563940	0.0113924	0.00183971	5.9221e-10	R3HD2	-0.0001306	-0.180299
12	57807114	57807114	rs540730	T	C	0.242481	0.020787	0.002142	3.03e-22	562357	0.0206909	0.00214166	4.40927e-22	R3HD2	-9.61e-05	-0.162924
12	64901246	64901246	rs7956653	G	A	0.557414	0.012788	0.001881	1.09e-11	562858	0.012825	0.00188067	9.1458e-12	TBK1	3.7e-05	0.0762048
12	69655167	69655167	rs7969559	A	G	0.282578	-0.011412	0.00205	2.66e-08	560786	-0.0117348	0.00204965	1.03261e-08	CPSF6	-0.0003228	0.410945
12	88818479	88818479	rs6538148	C	G	0.296108	0.011199	0.002019	2.98e-08	560786	0.0111522	0.00201865	3.30283e-08	SCF	-4.68e-05	-0.04467
12	89632748	89632748	rs4842486	C	T	0.273164	-0.012655	0.002086	1.35e-09	563946	-0.0126106	0.00208568	1.48212e-09	DUS6	4.44e-05	-0.0405496
12	91154207	91154207	rs7954238	C	T	0.273548	0.014309	0.002065	4.34e-12	562361	0.0144002	0.00206465	3.06635e-12	CCER1	9.12e-05	0.150868
12	94984559	94984559	rs4761637	T	C	0.418589	0.0122	0.001869	6.84e-11	562858	0.0121113	0.00186868	9.09925e-11	TMCC3	-8.87e-05	-0.123949
12	96036307	96036307	rs12813355	G	A	0.379314	0.010645	0.001919	2.97e-08	559189	0.0107436	0.00191867	2.14999e-08	NET4	9.86e-05	0.14032
12	96196005	96196005	rs11108272	C	T	0.165111	0.016034	0.002482	1.08e-10	562361	0.0160439	0.00248158	1.01172e-10	NET4	9.9e-06	0.0283634
12	109036359	109036359	rs1558801	C	A	0.390759	0.01128	0.001926	4.82e-09	561410	0.011312	0.0019257	4.24764e-09	COR1C	3.2e-05	0.0548993
12	110124259	110124259	rs11615541	G	C	0.664751	0.0117	0.001972	3.08e-09	560783	0.011801	0.00197168	2.16048e-09	F222A	0.000101	0.154
12	110266275	110266275	rs4766633	A	G	0.426601	-0.011733	0.001938	1.44e-09	563000	-0.0119375	0.0019377	7.24286e-10	TRPV4	-0.0002045	0.298452
12	110629266	110629266	rs12296821	G	A	0.397008	-0.014672	0.001877	5.74e-15	563003	-0.014948	0.0018767	1.65154e-15	IFT81	-0.000276	0.541023
12	111155947	111155947	rs10774603	T	C	0.369956	-0.01533	0.001905	8.9e-16	563003	-0.0156479	0.00190467	2.11197e-16	PP1G	-0.0003179	0.624702
12	111288843	111288843	rs10219717	T	C	0.381942	0.017633	0.001938	9.68e-20	559701	0.0177119	0.00193767	6.19885e-20	CCD63	7.89e-05	0.193564
12	111426615	111426615	rs7968960	C	A	0.34333	0.035676	0.001959	4.96e-74	562859	0.0358707	0.00195866	6.4079e-75	CUX2	0.0001947	0.888766
12	111764556	111764556	rs147459200	G	A	0.047774	-0.033359	0.004366	2.27e-14	563937	-0.0336202	0.0043653	1.34265e-14	CUX2	-0.0002612	0.228063
12	111881327	111881327	rs184250093	A	G	0.003445	0.119918	0.017844	1.88e-11	492038	0.119797	0.0178411	1.88462e-11	SH2B3	-0.000121	-0.00106595
12	111923455	111923455	rs17805591	A	G	0.038004	-0.050683	0.004872	2.57e-25	559204	-0.050582	0.00487114	2.93217e-25	ATX2	0.000101	-0.057256
12	111932800	111932800	rs7137828	C	T	0.483762	0.064984	0.00184	3.69e-273	562853	0.0651713	0.00183971	7.10291e-275	ATX2	0.0001873	1.71559
12	111976799	111976799	rs139118293	C	G	0.011438	0.070199	0.01223	9.73e-09	451496	0.0704356	0.012228	8.4017e-09	ATX2	0.0002366	0.0637457
12	111993571	111993571	rs11610849	A	G	0.030176	-0.061845	0.005543	7.19e-29	562088	-0.0619608	0.00554203	5.09969e-29	ATX2	-0.0001158	0.149185
12	112003695	112003695	rs615134	A	T	0.111996	-0.049213	0.00294	7.52e-63	562845	-0.0492894	0.00293955	4.2065e-63	ATX2	-7.64e-05	0.252297
12	112090022	112090022	rs10744774	C	A	0.165822	-0.032438	0.002519	6.47e-38	562363	-0.0326475	0.00251856	1.98961e-38	BRAP	-0.0002095	0.512136
12	112501984	112501984	rs191012961	G	A	0.003128	0.136274	0.019334	1.88e-12	490857	0.136005	0.0193308	1.98304e-12	NAA25	-0.000269	-0.0231736
12	112505984	112505984	rs113053121	T	C	0.078489	-0.039963	0.003419	1.56e-31	562858	-0.0400985	0.00341847	8.95091e-32	NAA25	-0.0001355	0.241257
12	112585635	112585635	rs6489831	T	C	0.040713	-0.038625	0.004679	1.61e-16	563936	-0.0388345	0.00467824	1.03171e-16	TRAD1	-0.0002095	0.193268
12	112601733	112601733	rs111277819	A	T	0.036533	-0.052053	0.004946	7.21e-26	563937	-0.0520037	0.00494522	7.29397e-26	HECD4	4.93e-05	-0.00502871
12	112674718	112674718	rs73207624	T	C	0.037531	0.038716	0.00488	2.23e-15	563945	0.0385189	0.00487924	2.91639e-15	HECD4	-0.0001971	-0.116541
12	112762188	112762188	rs146320927	C	T	0.019171	-0.040113	0.006845	4.74e-09	563941	-0.04032	0.00684391	3.83014e-09	HECD4	-0.000207	0.0925637
12	112869573	112869573	rs142829342	G	A	0.008647	0.068654	0.011105	6.51e-10	558840	0.0687353	0.0111032	5.99499e-10	PTN11	8.13e-05	0.0357925
12	112883476	112883476	rs11066309	A	G	0.411869	0.055642	0.001878	6.51e-193	561852	0.055886	0.0018777	1.17688e-194	PTN11	0.000244	1.74285
12	112902808	112902808	rs17822514	T	C	0.028781	-0.058507	0.005516	3e-26	563945	-0.0586992	0.00551509	1.87205e-26	PTN11	-0.0001922	0.204804
12	112904955	112904955	rs11614544	G	A	0.13702	-0.029211	0.002743	1.87e-26	562085	-0.0292948	0.00274255	1.24127e-26	PTN11	-8.38e-05	0.177975
12	112964653	112964653	rs189222893	A	G	0.011334	0.072708	0.012423	4.97e-09	451502	0.0730752	0.012421	4.02366e-09	PTN11	0.0003672	0.0917351
12	113016244	113016244	rs74672796	A	C	0.092013	-0.026571	0.003243	2.69e-16	561852	-0.0265932	0.00324248	2.37431e-16	RP3A	-2.22e-05	0.0542149
12	113031474	113031474	rs233722	G	A	0.400284	0.027716	0.001896	2.31e-48	561275	0.0279033	0.00189567	4.8337e-49	RP3A	0.0001873	0.679332
12	113235279	113235279	rs7132088	T	C	0.437626	-0.017971	0.001885	1.64e-21	561913	-0.0180548	0.0018847	9.73471e-22	RP3A	-8.38e-05	0.226521
12	113265248	113265248	rs7970581	T	G	0.2521	0.014714	0.002169	1.21e-11	558760	0.0146721	0.00216863	1.32743e-11	RP3A	-4.19e-05	-0.0402263
12	114802138	114802138	rs1895585	A	G	0.252387	-0.012219	0.002113	7.48e-09	563943	-0.0123669	0.00211263	4.8057e-09	TBX5	-0.0001479	0.192145
12	115366182	115366182	rs7309382	C	T	0.407439	0.016775	0.001875	3.92e-19	563942	0.0167504	0.00187472	4.07635e-19	TBX3	-2.46e-05	-0.0169854
12	115553034	115553034	rs35442	A	G	0.278907	0.011207	0.00205	4.69e-08	562360	0.0112588	0.00204965	3.95135e-08	TBX3	5.18e-05	0.0744273
12	117599349	117599349	rs6490117	C	G	0.54674	0.015318	0.001855	1.58e-16	560786	0.0155792	0.00185468	4.4669e-17	FBX21	0.0002612	0.548651
12	120862195	120862195	rs7970534	C	G	0.337539	0.013044	0.001951	2.37e-11	563842	0.0130613	0.00195069	2.14635e-11	CX6A1	1.73e-05	0.0430478
12	121299408	121299408	rs688402	C	T	0.354443	-0.01241	0.00193	1.31e-10	559846	-0.0124273	0.00192966	1.19383e-10	SPPL3	-1.73e-05	0.0403288
12	121431300	121431300	rs1169301	T	C	0.295305	0.023446	0.002024	5.33e-31	563941	0.0234435	0.00202368	4.93341e-31	HNF1A	-2.5e-06	0.03358
12	122275012	122275012	rs1975615	T	C	0.220878	0.013193	0.002274	6.76e-09	563939	0.0130747	0.00227361	8.89072e-09	HPPD	-0.0001183	-0.11899
12	122484294	122484294	rs1916334	A	G	0.195667	0.014835	0.002359	3.28e-10	562357	0.0151628	0.0023586	1.28687e-10	BCL7A	0.0003278	0.406339
12	123070616	123070616	rs7137722	G	T	0.263772	0.011694	0.002125	3.83e-08	559504	0.0121918	0.00212467	9.56799e-09	KNTC1	0.0004978	0.602378
12	124499542	124499542	rs1048497	A	G	0.165794	-0.014796	0.002525	4.79e-09	559200	-0.0150474	0.00252456	2.51655e-09	F101A	-0.0002514	0.27953
12	124505444	124505444	rs863750	C	T	0.396726	-0.010795	0.001894	1.24e-08	559204	-0.011071	0.00189367	5.02574e-09	F101A	-0.000276	0.392222
12	133105852	133105852	rs4242906	G	A	0.230094	0.018374	0.002297	1.32e-15	510119	0.0184184	0.00229662	1.05931e-15	FBSL	4.44e-05	0.0955509
12	133149785	133149785	rs4883515	G	T	0.294699	0.011747	0.002125	3.31e-08	509179	0.0117766	0.00212465	2.97632e-08	FBSL	2.96e-05	0.0461484
13	28718574	28718574	rs9581999	G	A	0.153589	-0.014594	0.00257	1.4e-08	563920	-0.014732	0.00256957	9.85259e-09	PAN3	-0.000138	0.152578
13	29147852	29147852	rs7321403	A	G	0.307851	-0.011116	0.002018	3.72e-08	562359	-0.0111431	0.00201765	3.33606e-08	VGFR1	-2.71e-05	0.0473091
13	29230581	29230581	rs1340817	A	G	0.646288	0.022988	0.001932	1.27e-32	560788	0.0229535	0.00193167	1.45556e-32	POMP	-3.45e-05	-0.0592264
13	32319994	32319994	rs9548936	C	T	0.194873	0.013641	0.002341	5.81e-09	562359	0.0137174	0.00234059	4.61067e-09	RXFP2	7.64e-05	0.100412
13	33723244	33723244	rs12863103	T	C	0.287473	0.014558	0.002046	1.15e-12	560787	0.0145654	0.00204565	1.07789e-12	STA13	7.4e-06	0.0281234
13	41254104	41254104	rs9549260	A	C	0.215164	0.014695	0.002251	6.88e-11	559202	0.014902	0.00225062	3.56059e-11	FOXO1	0.000207	0.286066
13	49198457	49198457	rs12864882	T	C	0.262882	0.012063	0.002098	9.15e-09	560785	0.011994	0.00209764	1.07873e-08	CLTR2	-6.9e-05	-0.0714917
13	50979081	50979081	rs140798001	C	G	0.041394	-0.026294	0.004672	1.87e-08	563946	-0.0263186	0.00467128	1.75932e-08	LEU1	-2.46e-05	0.0264968
13	51165494	51165494	rs1239682	C	T	0.46356	0.012481	0.001851	1.6e-11	563940	0.0125254	0.00185071	1.30686e-11	LEU1	4.44e-05	0.0878909
13	51395576	51395576	rs9535498	A	G	0.439986	-0.01297	0.001859	3.17e-12	563944	-0.0129232	0.00185868	3.57906e-12	LEU7	4.68e-05	-0.0527097
13	71718557	71718557	rs9542593	G	A	0.40693	-0.012254	0.001888	8.84e-11	560786	-0.0124487	0.0018877	4.26275e-11	DACH1	-0.0001947	0.316762
13	78447374	78447374	rs1924929	A	G	0.223904	0.013275	0.002212	2.01e-09	563945	0.0135485	0.00221165	9.01304e-10	EDNRB	0.0002735	0.348325
13	95907223	95907223	rs9590221	T	C	0.600673	-0.010543	0.001892	2.57e-08	562359	-0.0105282	0.00189171	2.61481e-08	MRP4	1.48e-05	-0.00750701
13	96061178	96061178	rs7490694	A	G	0.291146	0.01231	0.002033	1.44e-09	563946	0.0122533	0.00203265	1.65758e-09	CLD10	-5.67e-05	-0.061112
13	111094489	111094489	rs12856221	A	G	0.275974	-0.0124	0.002073	2.26e-09	560743	-0.0123384	0.00207264	2.63315e-09	CO4A2	6.16e-05	-0.0663672
13	114551993	114551993	rs6602909	C	T	0.32743	0.019932	0.002077	8.72e-22	502069	0.020033	0.00207665	5.07184e-22	GAS6	0.000101	0.235351
14	21542766	21542766	rs12889267	G	A	0.166485	-0.024321	0.002493	1.87e-22	562850	-0.0242421	0.00249261	2.34526e-22	ARH40	7.89e-05	-0.0983494
14	23495048	23495048	rs941718	C	T	0.281956	-0.011755	0.002047	9.59e-09	563006	-0.0117698	0.00204665	8.88456e-09	PSB5	-1.48e-05	0.0331827
14	24799586	24799586	rs74896270	A	G	0.044788	0.027373	0.004477	9.96e-10	563945	0.0276391	0.00447629	6.63469e-10	ADCY4	0.0002661	0.176439
14	24881986	24881986	rs36012880	C	T	0.474437	0.013214	0.001857	1.15e-12	562997	0.0131647	0.00185671	1.33761e-12	NYNRI	-4.93e-05	-0.0656317
14	34645544	34645544	rs797344	T	C	0.314935	-0.018941	0.001998	2.65e-21	561273	-0.018872	0.00199766	3.48563e-21	EGLN3	6.9e-05	-0.119035
14	34724550	34724550	rs12897414	C	T	0.382515	0.01295	0.001926	1.86e-11	561144	0.0131989	0.00192567	7.17248e-12	EGLN3	0.0002489	0.413844
14	36050217	36050217	rs77406312	C	T	0.086878	-0.029025	0.003319	2.36e-18	563944	-0.0291458	0.00331849	1.59406e-18	RGPA1	-0.0001208	0.170407
14	50655357	50655357	rs72681869	C	G	0.010306	0.065351	0.009361	3.04e-12	557020	0.0665659	0.00935949	1.14264e-12	SOS2	0.0012149	0.424964
14	50923249	50923249	rs12881869	T	C	0.070375	-0.029525	0.003604	2.7e-16	562362	-0.0296408	0.00360339	1.93867e-16	M4K5	-0.0001158	0.14386
14	51133287	51133287	rs2934701	T	A	0.426121	0.012511	0.00187	2.3e-11	563942	0.0126194	0.00186969	1.4837e-11	SAV1	0.0001084	0.190382
14	64692906	64692906	rs13136	A	T	0.095362	-0.022243	0.003179	2.71e-12	563940	-0.0222701	0.0031785	2.44394e-12	ESR2	-2.71e-05	0.0448788
14	64703318	64703318	rs1256062	C	T	0.107908	0.017407	0.002979	5.25e-09	563002	0.0173725	0.00297849	5.45499e-09	ESR2	-3.45e-05	-0.0166347
14	64703593	64703593	rs1256061	T	G	0.475101	-0.025386	0.001846	5.67e-43	562993	-0.0253416	0.00184568	6.69291e-43	ESR2	4.44e-05	-0.0720319
14	64886421	64886421	rs2295641	C	T	0.089965	-0.019653	0.003241	1.36e-09	562999	-0.019621	0.0032405	1.40488e-09	C1TC	3.2e-05	-0.0141003
14	65275083	65275083	rs142221574	G	C	0.016215	-0.050384	0.007443	1.34e-11	563943	-0.0504776	0.00744185	1.17751e-11	SPTB1	-9.36e-05	0.0561402
14	65441561	65441561	rs4499147	A	G	0.58153	-0.010645	0.001876	1.44e-08	559195	-0.0104651	0.00187568	2.41381e-08	FNTB	0.0001799	-0.224341
14	65513835	65513835	rs55771504	C	T	0.137986	0.027509	0.002683	1.23e-24	563943	0.0275164	0.00268258	1.09591e-24	FNTB	7.4e-06	0.0501302
14	65652886	65652886	rs78313147	A	G	0.130594	0.017244	0.003003	9.54e-09	563000	0.0173376	0.00300253	7.72509e-09	MAX	9.36e-05	0.0916448
14	65801099	65801099	rs61989037	T	C	0.026704	0.036207	0.005782	3.93e-10	563943	0.0362489	0.00578111	3.6052e-10	FUT8	4.19e-05	0.0374632
14	66023961	66023961	rs2898814	T	C	0.319144	-0.016657	0.001978	3.9e-17	563935	-0.016864	0.00197766	1.4986e-17	FUT8	-0.000207	0.415379
14	68581256	68581256	rs408156	A	G	0.229176	0.014275	0.002212	1.12e-10	563946	0.0143046	0.00221162	9.9359e-11	RA51B	2.96e-05	0.0520108
14	69248257	69248257	rs72731550	T	C	0.175472	0.014752	0.002424	1.2e-09	563943	0.0148087	0.00242362	9.95356e-10	TISB	5.67e-05	0.0812028
14	69310512	69310512	rs174213	T	C	0.328384	-0.013447	0.001974	1.01e-11	562356	-0.0134051	0.00197366	1.10586e-11	ACTN1	4.19e-05	-0.0393788
14	70354858	70354858	rs1958078	A	C	0.157879	-0.014127	0.002564	3.7e-08	559205	-0.0141319	0.00256356	3.53552e-08	SMOC1	-4.9e-06	0.0197484
14	73323682	73323682	rs6574100	T	A	0.399679	-0.01378	0.001881	2.46e-13	563941	-0.0134892	0.00188067	7.36202e-13	DPF3	0.0002908	-0.476062
14	73884540	73884540	rs10142359	A	G	0.514478	-0.013535	0.001838	1.85e-13	563944	-0.0133034	0.00183771	4.51714e-13	NUMB	0.0002316	-0.387692
14	74084993	74084993	rs146203818	T	C	0.007086	0.077018	0.011466	1.92e-11	563302	0.0771634	0.0114642	1.68745e-11	ACOT6	0.0001454	0.0560703
14	74630170	74630170	rs147890085	G	A	0.008053	0.063398	0.010994	8.29e-09	563303	0.0633068	0.0109923	8.4514e-09	LIN52	-9.12e-05	-0.00837413
14	76624547	76624547	rs8020977	G	T	0.528915	0.012513	0.001849	1.35e-11	559195	0.0124637	0.00184868	1.56282e-11	GPT2L	-4.93e-05	-0.0635752
14	99707933	99707933	rs3916222	T	C	0.439635	0.015289	0.001869	2.99e-16	563939	0.0155009	0.00186868	1.08463e-16	BC11B	0.0002119	0.44039
14	103992096	103992096	rs11160752	G	C	0.289564	0.015595	0.002057	3.54e-14	563944	0.0152944	0.00205667	1.03424e-13	KCRB	-0.0003006	-0.465618
14	105595818	105595818	rs2056860	T	C	0.227221	-0.01406	0.002214	2.22e-10	558120	-0.0140156	0.00221362	2.42699e-10	JAG2	4.44e-05	-0.038715
15	33025979	33025979	rs10318	T	C	0.18665	0.013462	0.002386	1.72e-08	562354	0.0135039	0.00238559	1.50839e-08	GREM1	4.19e-05	0.0570148
15	33313665	33313665	rs35380582	C	G	0.180348	0.019566	0.002412	5.24e-16	562079	0.0197089	0.00241162	3.02118e-16	FMN1	0.0001429	0.239155
15	41209516	41209516	rs6492970	A	G	0.443486	0.011038	0.001904	6.93e-09	563931	0.0109986	0.00190367	7.57896e-09	DLL4	-3.94e-05	-0.0388764
15	41464995	41464995	rs73396340	T	C	0.164504	-0.019414	0.002497	7.85e-15	562532	-0.019313	0.0024966	1.0282e-14	EXD1	0.000101	-0.117208
15	42235316	42235316	rs11549015	T	C	0.165176	0.01505	0.002527	2.68e-09	561276	0.0151042	0.00252656	2.25667e-09	EHD4	5.42e-05	0.0746667
15	42450180	42450180	rs146131796	T	A	0.019891	-0.067696	0.006883	8.49e-23	563943	-0.0672352	0.00688193	1.51738e-22	VPS39	0.0004608	-0.252187
15	42876014	42876014	rs7168835	T	C	0.286821	-0.015023	0.00203	1.43e-13	563946	-0.0150131	0.00202965	1.39373e-13	STAR9	9.9e-06	0.0111574
15	43099550	43099550	rs149492745	T	C	0.022649	-0.079673	0.006587	1.21e-33	562083	-0.079222	0.00658596	2.50418e-33	TTBK2	0.000451	-0.31588
15	43685140	43685140	rs11637572	A	C	0.660406	0.013419	0.001952	6.38e-12	563938	0.0132145	0.00195167	1.28016e-11	GCP4	-0.0002045	-0.302444
15	43757184	43757184	rs190543502	C	T	0.024462	-0.089528	0.006061	2.46e-49	563938	-0.0888478	0.00606007	1.14254e-48	TP53B	0.0006802	-0.666936
15	44257954	44257954	rs2957582	T	C	0.280032	-0.015725	0.002105	8.32e-14	562823	-0.0155845	0.00210466	1.31366e-13	FRMD5	0.0001405	-0.19836
15	44297617	44297617	rs138893177	T	C	0.025177	-0.081799	0.005914	1.83e-43	563844	-0.0812544	0.00591309	5.73145e-43	FRMD5	0.0005446	-0.495813
15	44842210	44842210	rs151291132	G	A	0.025276	-0.077293	0.006143	2.86e-36	562085	-0.0768765	0.00614203	6.06705e-36	EIF3J	0.0004165	-0.326612
15	44934255	44934255	rs75231500	G	T	0.034119	0.031162	0.005216	2.38e-09	562069	0.0311226	0.00521517	2.40615e-09	SPTCS	-3.94e-05	-0.00474574
15	45344086	45344086	rs2470658	T	C	0.115187	-0.017874	0.002959	1.58e-09	563946	-0.0179529	0.00295853	1.29371e-09	DHSO	-7.89e-05	0.0868202
15	51087938	51087938	rs12916630	G	A	0.150138	0.018197	0.002576	1.7e-12	563942	0.0182956	0.0025756	1.21709e-12	SPP2A	9.86e-05	0.145126
15	56147852	56147852	rs2438128	G	A	0.205804	0.013203	0.002273	6.46e-09	563944	0.0132079	0.00227261	6.18098e-09	NEDD4	4.9e-06	0.0191752
15	57734187	57734187	rs8034838	C	G	0.266275	-0.012614	0.002091	1.65e-09	560779	-0.0126239	0.00209065	1.55797e-09	CGNL1	-9.9e-06	0.0249249
15	58723939	58723939	rs2070895	A	G	0.218914	-0.022901	0.002223	7.47e-25	563942	-0.0228394	0.00222261	9.04853e-25	AL1A2	6.16e-05	-0.0832574
15	60979812	60979812	rs2414679	G	C	0.44257	-0.015704	0.001899	1.41e-16	562861	-0.015805	0.00189871	8.4971e-17	RORA	-0.000101	0.219948
15	63366282	63366282	rs2937859	G	A	0.199546	0.016279	0.00232	2.34e-12	559845	0.0163332	0.0023196	1.90323e-12	TPM1	5.42e-05	0.0897246
15	64370622	64370622	rs76498583	A	T	0.073419	-0.020504	0.003573	9.82e-09	563901	-0.0204325	0.00357244	1.06844e-08	FA96A	7.15e-05	-0.0366387
15	65935195	65935195	rs12101597	C	G	0.567357	0.017813	0.001871	1.85e-21	563946	0.0177908	0.00187068	1.89996e-21	NCKX1	-2.22e-05	-0.0115727
15	66923403	66923403	rs12913536	C	G	0.477515	0.010664	0.001866	1.13e-08	563938	0.0106049	0.00186568	1.3144e-08	LCTL	-5.91e-05	-0.0656491
15	66943404	66943404	rs8030097	C	G	0.190173	-0.023816	0.002376	1.3e-23	563943	-0.0238825	0.00237562	8.89423e-24	SMAD6	-6.65e-05	0.164835
15	66953815	66953815	rs34568368	A	G	0.191224	-0.016723	0.002373	1.89e-12	563944	-0.0166589	0.00237262	2.19776e-12	SMAD6	6.41e-05	-0.0655185
15	66987827	66987827	rs58683410	T	C	0.34514	0.016874	0.00197	1.12e-17	562857	0.0168962	0.00196968	9.64426e-18	SMAD6	2.22e-05	0.0649491
15	67055081	67055081	rs4467023	A	G	0.462678	0.013098	0.00189	4.33e-12	562357	0.0131153	0.00188967	3.90746e-12	SMAD6	1.73e-05	0.0445934
15	67146200	67146200	rs181269956	G	A	0.010825	0.071992	0.009003	1.35e-15	563297	0.0717973	0.0090016	1.51078e-15	SMAD6	-0.0001947	-0.0488675
15	67465547	67465547	rs72743481	C	T	0.320117	0.013637	0.001995	8.5e-12	563938	0.0135655	0.00199469	1.0403e-11	SMAD3	-7.15e-05	-0.0877397
15	67769907	67769907	rs17232873	G	C	0.060655	0.022275	0.003904	1.19e-08	558927	0.0219349	0.00390332	1.91442e-08	IQCH	-0.0003401	-0.20649
15	68254345	68254345	rs16951523	C	G	0.079238	-0.021309	0.003443	6.25e-10	560696	-0.0214766	0.0034424	4.40853e-10	PIAS1	-0.0001676	0.151586
15	68329444	68329444	rs11071975	T	G	0.269789	-0.015748	0.002102	7.16e-14	560783	-0.015849	0.00210163	4.65278e-14	PIAS1	-0.000101	0.187201
15	72108307	72108307	rs11072332	T	G	0.225441	-0.020031	0.002208	1.25e-19	563003	-0.0197476	0.00220766	3.71769e-19	MYO9A	0.0002834	-0.473363
15	72155423	72155423	rs28602607	T	C	0.018432	-0.047407	0.006893	6.3e-12	563913	-0.0469708	0.00689191	9.40334e-12	MYO9A	0.0004362	-0.173942
15	72656241	72656241	rs11633028	G	A	0.726112	0.015649	0.002105	1.1e-13	563004	0.0154321	0.00210463	2.2594e-13	HEXA	-0.0002169	-0.3126
15	75114322	75114322	rs11636952	C	T	0.685099	-0.016298	0.002019	7.19e-16	562360	-0.0164434	0.00201867	3.77225e-16	LMA1L	-0.0001454	0.280128
15	75431795	75431795	rs902476	G	T	0.327898	0.018524	0.001981	9.05e-21	559991	0.0187039	0.00198065	3.61197e-21	COAC	0.0001799	0.398904
15	75510626	75510626	rs117953640	G	A	0.03615	0.029867	0.005173	7.98e-09	562086	0.0298596	0.00517218	7.78178e-09	CO039	-7.4e-06	0.0109239
15	75632280	75632280	rs117112913	T	C	0.027502	0.034109	0.006009	1.41e-08	562087	0.0337862	0.00600804	1.87133e-08	COMD4	-0.0003228	-0.122931
15	75932777	75932777	rs11072553	T	C	0.254993	-0.017627	0.002165	4.06e-16	563001	-0.0175728	0.00216465	4.73707e-16	IMP3	5.42e-05	-0.0669838
15	75977920	75977920	rs62027240	G	A	0.557386	-0.01162	0.001941	2.21e-09	510113	-0.0117457	0.00194068	1.42744e-09	CSPG4	-0.0001257	0.189834
15	76119092	76119092	rs3991319	T	C	0.104024	0.0194	0.00306	2.37e-10	563002	0.0195158	0.00305947	1.78461e-10	UB2Q2	0.0001158	0.123205
15	76196496	76196496	rs374074953	G	A	0.023861	0.073571	0.006018	2.47e-34	563936	0.0733739	0.00601705	3.33273e-34	FBX22	-0.0001971	-0.130103
15	76298132	76298132	rs4886755	G	A	0.511547	-0.034268	0.001842	3.25e-77	563942	-0.0341965	0.00184168	5.82554e-77	NRG4	7.15e-05	-0.253453
15	76446707	76446707	rs2955739	A	G	0.167436	-0.021972	0.002478	8.04e-19	563945	-0.021972	0.00247758	7.42427e-19	CO027	0	0.0346023
15	77134807	77134807	rs116873941	T	C	0.016221	0.062455	0.007304	1.29e-17	563944	0.0622554	0.00730284	1.53056e-17	SCAPE	-0.0001996	-0.0742606
15	77183989	77183989	rs117620875	T	C	0.047832	-0.034597	0.004382	3.06e-15	563944	-0.0347966	0.00438131	1.98848e-15	SCAPE	-0.0001996	0.1872
15	77312826	77312826	rs16968627	C	T	0.088275	-0.018439	0.003289	2.12e-08	563945	-0.0181827	0.00328843	3.21525e-08	PPIP1	0.0002563	-0.180879
15	77842095	77842095	rs79590310	G	A	0.427702	0.014261	0.001873	2.82e-14	563938	0.0141969	0.0018727	3.4292e-14	LIGO1	-6.41e-05	-0.0849437
15	78274724	78274724	rs34194223	T	C	0.23607	0.015135	0.002218	9.12e-12	563001	0.0151621	0.00221765	8.08649e-12	TBD2B	2.71e-05	0.0522348
15	78535437	78535437	rs4887023	G	C	0.3921	-0.020445	0.001893	3.74e-27	560764	-0.0203169	0.00189267	7.01091e-27	ACBG1	0.0001281	-0.272903
15	78664005	78664005	rs8036879	A	G	0.348888	-0.012131	0.001955	5.68e-10	559205	-0.0119856	0.00195466	8.68794e-10	RABP1	0.0001454	-0.184568
15	85618882	85618882	rs2304416	G	A	0.209619	-0.014109	0.002271	5.35e-10	560786	-0.0140572	0.00227061	5.98015e-10	PDE8A	5.18e-05	-0.0483583
15	86169724	86169724	rs62022865	C	A	0.135641	0.017515	0.002692	8e-11	563941	0.0174263	0.00269158	9.52086e-11	AKP13	-8.87e-05	-0.0755862
15	95740236	95740236	rs290671	T	C	0.3468	0.012528	0.001969	2.05e-10	561384	0.0126438	0.00196869	1.3408e-10	MCTP2	0.0001158	0.18439
15	99271135	99271135	rs6598541	A	G	0.358637	-0.012571	0.001925	6.75e-11	563940	-0.0127977	0.00192466	2.94438e-11	IGF1R	-0.0002267	0.36031
15	99998709	99998709	rs4965500	A	G	0.23134	-0.015697	0.002206	1.17e-12	562846	-0.015867	0.00220566	6.30157e-13	MEF2A	-0.00017	0.268737
16	159710	159710	rs12931752	A	C	0.487411	-0.017456	0.001962	5.96e-19	492686	-0.0174314	0.00196167	6.33703e-19	NPRL3	2.46e-05	-0.0266395
16	212649	212649	rs3785309	T	C	0.099614	-0.029619	0.00325	8.45e-20	507451	-0.0296313	0.00324943	7.58799e-20	HBM	-1.23e-05	0.04673
16	216593	216593	rs141494605	C	T	0.006746	-0.089594	0.012926	4.33e-12	493770	-0.0893574	0.0129239	4.70698e-12	HBM	0.0002366	-0.0362545
16	247470	247470	rs7189975	A	G	0.069533	0.035465	0.003864	4.59e-20	493770	0.03581	0.00386333	1.87545e-20	LUC7L	0.000345	0.388707
16	281299	281299	rs3760047	G	A	0.188227	0.027152	0.002445	1.25e-28	546654	0.0272284	0.0024446	8.17627e-29	LUC7L	7.64e-05	0.184355
16	402078	402078	rs7186323	T	C	0.176842	-0.016886	0.002566	4.85e-11	493761	-0.016647	0.00256558	8.66444e-11	AXIN1	0.000239	-0.251999
16	2086421	2086421	rs139491786	T	C	0.006668	-0.118571	0.011945	3.43e-23	505319	-0.118268	0.011943	4.0535e-23	NHRF2	0.000303	-0.0725361
16	4229342	4229342	rs72764661	G	T	0.15165	-0.014642	0.002581	1.43e-08	562999	-0.0145607	0.0025806	1.67734e-08	SRCA	8.13e-05	-0.0692851
16	4676660	4676660	rs3859158	G	A	0.185088	-0.016985	0.002485	8.55e-12	510121	-0.0170096	0.00248459	7.59075e-12	MGRN1	-2.46e-05	0.0516814
16	4922450	4922450	rs12102426	G	T	0.428427	-0.011381	0.001886	1.65e-09	546400	-0.0116792	0.0018857	5.88181e-10	UBN1	-0.0002982	0.447973
16	11678890	11678890	rs8059969	T	C	0.256537	-0.012217	0.002127	9.49e-09	563935	-0.0121997	0.00212667	9.66184e-09	LITAF	1.73e-05	-0.00779363
16	11922063	11922063	rs718081	G	A	0.643495	-0.010855	0.001937	2.16e-08	563944	-0.0109659	0.00193667	1.49406e-08	RL1D1	-0.0001109	0.160086
16	15129940	15129940	rs3198697	T	C	0.406083	-0.010381	0.001888	3.94e-08	559201	-0.0104549	0.00188767	3.05024e-08	PDXD1	-7.39e-05	0.111162
16	15811062	15811062	rs1050162	T	C	0.493509	-0.011475	0.001853	6.14e-10	559200	-0.0115637	0.00185268	4.33091e-10	MYH11	-8.87e-05	0.151589
16	16133994	16133994	rs165975	C	T	0.235325	-0.011952	0.00217	3.71e-08	563940	-0.0118879	0.00216965	4.27289e-08	MRP1	6.41e-05	-0.0613478
16	16259596	16259596	rs41278174	A	G	0.026766	0.052683	0.005992	1.55e-18	508540	0.0526386	0.00599102	1.54617e-18	MRP6	-4.44e-05	0.00107446
16	30103160	30103160	rs3809627	A	C	0.402529	0.018961	0.001972	7.25e-22	509180	0.0193947	0.00197167	7.824e-23	TBX6	0.0004337	0.966909
16	51188433	51188433	rs2052284	A	T	0.60643	-0.01665	0.001896	1.69e-18	562852	-0.0165884	0.00189569	2.12281e-18	SALL1	6.16e-05	-0.0990244
16	52570969	52570969	rs11648477	C	T	0.209842	-0.015293	0.002267	1.57e-11	560785	-0.0155197	0.00226661	7.5363e-12	TOX3	-0.0002267	0.318741
16	55319373	55319373	rs30933	G	A	0.447441	0.011379	0.001851	8.07e-10	563943	0.0113593	0.00185071	8.36679e-10	IRX6	-1.97e-05	-0.0156853
16	57349346	57349346	rs948705	G	T	0.151891	-0.01795	0.002642	1.13e-11	562363	-0.0180757	0.00264153	7.76171e-12	PLLP	-0.0001257	0.163121
16	58525312	58525312	rs62040067	T	C	0.110956	0.016771	0.002999	2.3e-08	563934	0.0167168	0.00299853	2.47537e-08	NDRG4	-5.42e-05	-0.0319123
16	67087407	67087407	rs115253693	C	T	0.066859	0.022662	0.003689	8.29e-10	563934	0.0224353	0.00368839	1.18193e-09	PEBB	-0.0002267	-0.154037
16	67206375	67206375	rs1152083	T	C	0.08148	-0.022035	0.003506	3.4e-10	562059	-0.0220941	0.00350545	2.92304e-10	NOL3	-5.91e-05	0.0656442
16	68324210	68324210	rs55856208	T	A	0.117696	0.022888	0.002861	1.3e-15	563829	0.0230038	0.00286056	8.85814e-16	S7A6O	0.0001158	0.166601
16	69559315	69559315	rs4783719	C	G	0.323027	0.013126	0.001983	3.7e-11	563943	0.0128401	0.00198268	9.40927e-11	NFAT5	-0.0002859	-0.405354
16	70769812	70769812	rs62048007	A	G	0.061751	0.027021	0.004	1.47e-11	563005	0.0269643	0.00399937	1.56062e-11	VAC14	-5.67e-05	-0.0259798
16	71635836	71635836	rs11641811	C	A	0.482071	-0.011847	0.001846	1.43e-10	563940	-0.0117189	0.00184571	2.16376e-10	MALD3	0.0001281	-0.179873
16	71654365	71654365	rs62053102	T	A	0.045708	0.027611	0.004556	1.39e-09	563004	0.0279806	0.00455528	8.12525e-10	MALD3	0.0003696	0.233178
16	72110323	72110323	rs146254843	T	G	0.021906	-0.040816	0.006347	1.31e-10	560444	-0.0410255	0.00634603	1.01467e-10	HPTR	-0.0002095	0.110946
16	72144174	72144174	rs9302635	C	T	0.182574	-0.022642	0.002389	2.74e-21	559845	-0.0226297	0.00238858	2.69059e-21	PRP16	1.23e-05	0.00790304
16	72153518	72153518	rs186286	G	A	0.082822	-0.021384	0.003376	2.47e-10	563944	-0.0215121	0.00337547	1.85271e-10	PMFBP	-0.0001281	0.12489
16	72256903	72256903	rs12934528	C	T	0.151825	0.015891	0.002601	1.02e-09	563946	0.0156002	0.00260055	1.9878e-09	PMFBP	-0.0002908	-0.289773
16	72380784	72380784	rs17607285	C	T	0.090323	0.024381	0.003213	3.41e-14	562362	0.0247901	0.00321245	1.19223e-14	PMFBP	0.0004091	0.456394
16	72895614	72895614	rs62053163	G	A	0.045995	0.025135	0.004469	1.92e-08	562087	0.0256599	0.0044683	9.32004e-09	ZFHX3	0.0005249	0.313883
16	79199414	79199414	rs1110542	A	T	0.580683	0.014747	0.001869	3.13e-15	563939	0.0148456	0.00186868	1.95091e-15	WWOX	9.86e-05	0.205307
16	83980529	83980529	rs4782568	G	C	0.448292	0.010707	0.001879	1.25e-08	562857	0.0105394	0.00187869	2.02325e-08	OSGI1	-0.0001676	-0.20914
16	86356582	86356582	rs731749	A	G	0.086253	-0.036802	0.003389	1.96e-27	562361	-0.036696	0.00338843	2.48659e-27	FOXF1	0.000106	-0.103348
16	86460598	86460598	rs35643510	C	T	0.55728	-0.011612	0.001875	6.05e-10	561919	-0.0117229	0.0018747	4.02095e-10	FOXF1	-0.0001109	0.177427
16	87868527	87868527	rs3889228	A	C	0.282747	0.015971	0.002147	1.06e-13	508534	0.0160819	0.00214662	6.79719e-14	LAT1	0.0001109	0.192976
16	88567333	88567333	rs74035509	T	C	0.07972	0.025898	0.003625	9.48e-13	510121	0.0256368	0.0036244	1.51189e-12	FOG1	-0.0002612	-0.202712
16	88761632	88761632	rs12920415	A	G	0.019064	0.042962	0.007283	3.77e-09	509184	0.0430754	0.00728176	3.3084e-09	RN166	0.0001134	0.0567233
16	88777073	88777073	rs12925612	C	G	0.011749	-0.077047	0.009335	1.62e-16	508030	-0.0770864	0.00933347	1.46724e-16	CTU2	-3.94e-05	0.0430139
16	88782050	88782050	rs61745086	A	G	0.01027	0.103746	0.010117	1.21e-24	503374	0.103256	0.0101154	1.82983e-24	PIEZ1	-0.00049	-0.179625
16	88792395	88792395	rs144326867	G	C	0.004939	-0.091165	0.014131	1.14e-10	501819	-0.0908126	0.0141287	1.29693e-10	PIEZ1	0.0003524	-0.0560117
16	88802248	88802248	rs4547319	A	G	0.194394	0.026778	0.002445	6.95e-28	510119	0.0267386	0.0024446	7.6004e-28	PIEZ1	-3.94e-05	-0.0388516
16	88856084	88856084	rs551118	C	G	0.420241	0.045331	0.001986	2.61e-115	510121	0.0454296	0.00198568	7.5902e-116	PIEZ1	9.86e-05	0.536387
16	88861423	88861423	rs188771247	C	T	0.012074	0.052159	0.009368	2.65e-08	508921	0.0519865	0.00936649	2.85233e-08	CDT1	-0.0001725	-0.0319539
16	88871972	88871972	rs145552478	A	G	0.005256	-0.077963	0.013572	9.46e-09	493328	-0.0779186	0.0135698	9.35244e-09	CDT1	4.44e-05	0.00496621
16	88898786	88898786	rs8050636	T	C	0.169045	-0.031039	0.002636	5.82e-32	509180	-0.0309897	0.00263557	6.40334e-32	GALNS	4.93e-05	-0.0414836
16	88954464	88954464	rs117765711	A	G	0.010237	-0.065883	0.010228	1.22e-10	508568	-0.0657573	0.0102263	1.27428e-10	MTG16	0.0001257	-0.018905
16	88972591	88972591	rs117482119	G	C	0.029485	0.036791	0.006023	1.03e-09	502882	0.0367121	0.00602202	1.0854e-09	MTG16	-7.89e-05	-0.0227526
16	89296455	89296455	rs66697325	A	G	0.120064	-0.016379	0.002895	1.58e-08	562855	-0.0165515	0.00289455	1.07679e-08	ZN778	-0.0001725	0.166526
16	89383725	89383725	rs3114908	T	C	0.363097	-0.013089	0.002015	8.49e-11	504937	-0.0131703	0.00201465	6.26491e-11	ANR11	-8.13e-05	0.131993
16	89708682	89708682	rs187492937	G	C	0.04236	-0.040003	0.004823	1.15e-16	510123	-0.0398551	0.00482221	1.39807e-16	CHM1A	0.0001479	-0.0848311
16	89727683	89727683	rs258332	A	G	0.418562	0.02376	0.001902	9.02e-36	563943	0.0236023	0.00190169	2.27203e-35	SPT33	-0.0001577	-0.401208
16	89795305	89795305	rs74606487	G	A	0.148258	-0.015369	0.002777	3.22e-08	509181	-0.015332	0.00277655	3.35225e-08	ZN276	3.7e-05	-0.0174805
16	89842784	89842784	rs17232826	T	C	0.101778	-0.028099	0.003085	8.99e-20	563866	-0.0280177	0.00308452	1.05306e-19	FANCA	8.13e-05	-0.0686934
16	89860723	89860723	rs148874140	A	G	0.041445	0.028351	0.004923	8.71e-09	508264	0.0288956	0.0049222	4.34563e-09	FANCA	0.0005446	0.301965
17	1240274	1240274	rs148799368	A	G	0.086752	0.020603	0.0033	4.4e-10	562530	0.0206646	0.00329948	3.77666e-10	1433E	6.16e-05	0.0663448
17	1618363	1618363	rs11078597	C	T	0.186042	-0.01417	0.002483	1.18e-08	508541	-0.0139359	0.00248258	1.98297e-08	WDR81	0.0002341	-0.225434
17	4151603	4151603	rs74498987	A	G	0.073574	-0.020031	0.00356	1.89e-08	563944	-0.0199916	0.00355944	1.94879e-08	ANFY1	3.94e-05	-0.0133032
17	7106378	7106378	rs200489612	A	G	0.005373	0.111097	0.014637	3.35e-14	495608	0.110698	0.0146346	3.90551e-14	DLG4	-0.000399	-0.0666329
17	7379617	7379617	rs4796420	A	T	0.212951	-0.019639	0.002277	6.71e-18	560785	-0.0194542	0.00227661	1.28271e-17	ZBTB4	0.0001848	-0.281406
17	7462555	7462555	rs11552708	A	G	0.125858	-0.022202	0.002793	1.95e-15	563004	-0.022064	0.00279252	2.76462e-15	TNF12	0.000138	-0.151601
17	7571452	7571452	rs1614984	A	G	0.429916	0.010913	0.001899	9.36e-09	561918	0.0108884	0.00189869	9.77074e-09	P53	-2.46e-05	-0.0186516
17	7657123	7657123	rs2111834	A	G	0.120745	-0.026586	0.00287	2.1e-20	563942	-0.02631	0.00286955	4.78899e-20	DYH2	0.000276	-0.358025
17	7731764	7731764	rs77193346	C	T	0.057281	0.032853	0.004001	2.3e-16	563946	0.0324636	0.00400037	4.85119e-16	DYH2	-0.0003894	-0.32412
17	7732351	7732351	rs57828851	A	T	0.567991	-0.021541	0.001917	2.97e-29	560444	-0.0213044	0.00191669	1.05771e-28	DYH2	0.0002366	-0.55161
17	8202539	8202539	rs185936859	G	A	0.026108	0.034316	0.005894	5.98e-09	563938	0.0342889	0.00589306	5.93706e-09	S2535	-2.71e-05	0.00312975
17	8257795	8257795	rs8069864	C	T	0.360489	-0.017503	0.001927	1.12e-19	563941	-0.0175597	0.0019267	7.94952e-20	ODFP4	-5.67e-05	0.148877
17	14822052	14822052	rs1016144	G	A	0.257865	-0.015591	0.002139	3.24e-13	561277	-0.0155836	0.00213864	3.17632e-13	PMP22	7.4e-06	0.00862076
17	19941879	19941879	rs8065337	A	C	0.52655	0.014247	0.001848	1.34e-14	563930	0.0142766	0.00184771	1.10424e-14	CYTSB	2.96e-05	0.0840413
17	27167973	27167973	rs11652272	G	C	0.198013	0.021273	0.002314	4.1e-20	563922	0.0215022	0.0023136	1.4885e-20	F222B	0.0002292	0.440035
17	27962197	27962197	rs55797987	A	G	0.456883	-0.013595	0.001871	3.81e-13	563936	-0.0133634	0.0018707	9.09833e-13	SSH2	0.0002316	-0.378037
17	35851177	35851177	rs865483	A	C	0.35675	0.012147	0.001926	2.95e-10	563946	0.0122505	0.0019257	1.9968e-10	DUS14	0.0001035	0.169487
17	36173595	36173595	rs3942352	C	T	0.294391	-0.013225	0.00203	7.56e-11	561920	-0.0132151	0.00202965	7.46236e-11	HNF1B	9.9e-06	0.0056456
17	37696235	37696235	rs4239222	G	T	0.25213	0.019782	0.002133	1.88e-20	560786	0.0196711	0.00213263	2.86549e-20	CDK12	-0.0001109	-0.183041
17	37903730	37903730	rs2941520	T	C	0.30674	0.012115	0.00207	4.96e-09	539660	0.0121249	0.00206967	4.6747e-09	GRB7	9.9e-06	0.0257279
17	42060631	42060631	rs62080325	G	A	0.332978	-0.011945	0.001981	1.69e-09	560912	-0.0119647	0.00198068	1.53441e-09	PYY	-1.97e-05	0.0419453
17	42275834	42275834	rs117820542	G	C	0.028261	0.047638	0.005624	2.58e-17	563945	0.0473349	0.00562313	3.83332e-17	AT7L3	-0.0003031	-0.171955
17	42311219	42311219	rs55805524	T	G	0.080052	0.024163	0.003473	3.58e-12	563935	0.024338	0.00347246	2.40264e-12	UBF1	0.000175	0.173194
17	42329004	42329004	rs13306780	C	A	0.696623	-0.025265	0.00204	3.49e-35	563933	-0.0250235	0.00203968	1.33947e-34	B3AT	0.0002415	-0.584108
17	42338482	42338482	rs45583834	A	G	0.089417	0.01968	0.003282	2.08e-09	563941	0.0194902	0.00328147	2.85917e-09	B3AT	-0.0001898	-0.138177
17	42493615	42493615	rs57128348	T	G	0.017797	0.042589	0.007422	9.8e-09	562582	0.0426161	0.00742077	9.31143e-09	GPTC8	2.71e-05	0.0222097
17	42979592	42979592	rs12451394	A	G	0.215765	-0.013543	0.002239	1.49e-09	562359	-0.0134617	0.00223862	1.81692e-09	CC103	8.13e-05	-0.0861495
17	43055579	43055579	rs11652522	A	C	0.104749	0.025054	0.003128	1.21e-15	559845	0.0249037	0.00312747	1.68062e-15	C1QRF	-0.0001503	-0.142684
17	43197085	43197085	rs7217321	A	G	0.186942	0.014846	0.002413	7.87e-10	562363	0.0148854	0.00241258	6.83203e-10	PLCD3	3.94e-05	0.061425
17	43549526	43549526	rs17631676	G	A	0.186877	0.045314	0.002394	8.01e-80	557111	0.0452351	0.00239363	1.18125e-79	PKHM1	-7.89e-05	-0.168709
17	43781083	43781083	rs117560908	T	C	0.257411	-0.019105	0.002158	9.12e-19	563944	-0.0190261	0.00215766	1.16557e-18	CRFR1	7.89e-05	-0.106544
17	43966105	43966105	rs242926	C	G	0.095407	-0.019968	0.003392	4.02e-09	558844	-0.019692	0.00339142	6.38218e-09	TAU	0.000276	-0.200743
17	44050828	44050828	rs9896485	C	G	0.410851	-0.024214	0.001911	9.46e-37	563942	-0.0240859	0.00191069	1.96046e-36	TAU	0.0001281	-0.316467
17	44057595	44057595	rs3785884	A	G	0.230491	0.045117	0.002197	1.07e-93	563935	0.0450234	0.00219666	2.3239e-93	TAU	-9.36e-05	-0.336834
17	44837217	44837217	rs199529	C	A	0.233592	0.039629	0.002188	2.79e-73	563942	0.0395649	0.00218762	4.12318e-73	NSF	-6.41e-05	-0.169628
17	44865603	44865603	rs199498	C	T	0.221997	0.045772	0.002359	8.77e-84	559697	0.0457227	0.0023586	1.02215e-83	WNT3	-4.93e-05	-0.066515
17	44871987	44871987	rs111769	T	C	0.427545	0.016996	0.001871	1.11e-19	562349	0.0169886	0.00187068	1.07061e-19	WNT3	-7.4e-06	0.0156917
17	45062049	45062049	rs35246578	A	T	0.366349	-0.021089	0.001922	5.56e-28	563940	-0.0210249	0.0019217	7.35528e-28	GOSR2	6.41e-05	-0.121524
17	45251260	45251260	rs183402	C	A	0.334342	-0.01225	0.001959	4.17e-10	562532	-0.0120553	0.00195869	7.51764e-10	CDC27	0.0001947	-0.255945
17	45399047	45399047	rs185129555	T	A	0.021222	-0.036465	0.006582	3.09e-08	562854	-0.0362407	0.006581	3.65259e-08	ITB3	0.0002243	-0.0726424
17	45595083	45595083	rs113046939	T	C	0.146165	-0.015334	0.002697	1.33e-08	560655	-0.015164	0.00269658	1.87226e-08	PSA	0.00017	-0.148515
17	45805177	45805177	rs72831632	T	C	0.172005	0.01431	0.002446	5.02e-09	563939	0.014172	0.00244561	6.83745e-09	TBX21	-0.000138	-0.13419
17	46010380	46010380	rs11079802	C	G	0.293392	0.016974	0.002024	5.31e-17	562085	0.0169691	0.00202366	5.05744e-17	SP2	-4.9e-06	0.0211638
17	46129762	46129762	rs17680229	A	G	0.151138	-0.024222	0.002606	1.56e-20	560785	-0.0240372	0.00260555	2.82601e-20	NF2L1	0.0001848	-0.258049
17	46345925	46345925	rs2938475	T	C	0.335433	0.01205	0.001953	7.06e-10	563940	0.0118479	0.00195269	1.29926e-09	SKAP1	-0.0002021	-0.264891
17	46592179	46592179	rs7223415	A	G	0.045499	0.02739	0.004429	6.43e-10	563003	0.0276734	0.00442824	4.12308e-10	HXB1	0.0002834	0.192989
17	46687752	46687752	rs12939324	A	C	0.164022	-0.02237	0.002498	3.53e-19	563938	-0.0221778	0.00249761	6.71014e-19	HXB7	0.0001922	-0.278957
17	47047596	47047596	rs3809770	G	A	0.406102	-0.011986	0.001884	2.03e-10	563940	-0.0117839	0.00188367	3.95432e-10	GIP	0.0002021	-0.289576
17	47319438	47319438	rs148633519	A	G	0.020414	-0.047001	0.006901	1e-11	563945	-0.0463701	0.00689993	1.81251e-11	PHOP1	0.0006309	-0.25828
17	47330796	47330796	rs34367165	A	G	0.320053	-0.011993	0.001978	1.37e-09	563942	-0.0118057	0.00197768	2.38029e-09	PHOP1	0.0001873	-0.239909
17	53364788	53364788	rs7224610	C	A	0.400719	0.012288	0.001904	1.14e-10	559201	0.012325	0.00190367	9.5239e-11	HLF	3.7e-05	0.07809
17	54986971	54986971	rs2586524	G	A	0.26563	-0.012483	0.002116	3.77e-09	562837	-0.0125717	0.00211567	2.81236e-09	TRI25	-8.87e-05	0.12727
17	56421097	56421097	rs35258348	G	T	0.28933	-0.012745	0.002041	4.39e-10	563939	-0.0126218	0.00204068	6.20657e-10	SPT4H	0.0001232	-0.150387
17	56436109	56436109	rs34523089	T	C	0.15765	0.018068	0.002532	9.94e-13	563298	0.0179916	0.00253162	1.18794e-12	RNF43	-7.64e-05	-0.0774081
17	57423326	57423326	rs7209789	T	C	0.309724	-0.012761	0.002032	3.5e-10	563003	-0.0125269	0.00203168	7.01383e-10	YPEL2	0.0002341	-0.301887
17	57966230	57966230	rs112149564	A	G	0.195722	-0.029503	0.002328	8.86e-37	563910	-0.0296065	0.00232763	4.60371e-37	TBD	-0.0001035	0.284326
17	58229415	58229415	rs117035168	A	G	0.017909	0.049073	0.008146	1.75e-09	454302	0.0491026	0.00814465	1.65166e-09	CAH4	2.96e-05	0.0251174
17	58636329	58636329	rs1197066	G	A	0.12715	-0.024309	0.002922	9.25e-17	563945	-0.0244667	0.0029215	5.53596e-17	APBP2	-0.0001577	0.222949
17	58778660	58778660	rs75965812	G	A	0.046065	-0.027657	0.004532	1.08e-09	563300	-0.0275091	0.00453129	1.27173e-09	BCAS3	0.0001479	-0.0709712
17	59244101	59244101	rs4968534	A	C	0.186085	-0.026707	0.00237	2.05e-29	563943	-0.0267686	0.0023696	1.36241e-29	BCAS3	-6.16e-05	0.177446
17	59302505	59302505	rs150653969	G	C	0.01133	-0.04897	0.008945	4.48e-08	562926	-0.0491326	0.00894357	3.93763e-08	BCAS3	-0.0001626	0.0560431
17	59454974	59454974	rs148241480	A	G	0.009991	0.058608	0.010013	4.96e-09	562937	0.0584256	0.0100114	5.34981e-09	BCAS3	-0.0001824	-0.0328567
17	59456589	59456589	rs9895661	C	T	0.175525	0.035619	0.002464	2.61e-47	559205	0.0355426	0.00246357	3.48624e-47	BCAS3	-7.64e-05	-0.125717
17	59502319	59502319	rs878745	C	T	0.198015	0.014328	0.002318	6.58e-10	559202	0.0144833	0.0023176	4.12435e-10	CQ082	0.0001553	0.20287
17	61923564	61923564	rs2727328	G	A	0.390054	0.017309	0.00189	5.64e-20	562859	0.0171685	0.00188971	1.03442e-19	SMRD2	-0.0001405	-0.263418
17	66453410	66453410	rs71378929	T	C	0.306916	-0.013196	0.002005	4.84e-11	563940	-0.0131566	0.00200469	5.27725e-11	WIPI1	3.94e-05	-0.0375623
17	67081278	67081278	rs77542162	G	A	0.021712	0.088	0.006366	2.02e-43	563302	0.0881824	0.006365	1.199e-43	ABCA6	0.0001824	0.226532
17	67392777	67392777	rs7216696	C	T	0.126151	0.017168	0.0028	8.9e-10	560912	0.0172124	0.00279956	7.83503e-10	MP2K6	4.44e-05	0.0553493
17	67468626	67468626	rs72856069	A	G	0.088327	0.028162	0.003317	2.16e-17	561916	0.0282236	0.00331647	1.73748e-17	MP2K6	6.16e-05	0.0945339
17	73364628	73364628	rs2385265	T	G	0.177232	-0.014126	0.002488	1.41e-08	560444	-0.0141827	0.00248759	1.18838e-08	GRB2	-5.67e-05	0.0742638
17	73647429	73647429	rs55853884	T	C	0.043799	-0.026647	0.004781	2.56e-08	510120	-0.0265336	0.00478021	2.84491e-08	RECQ5	0.0001134	-0.0458286
17	76121864	76121864	rs2748427	G	A	0.219314	0.019086	0.002348	4.56e-16	508531	0.0190589	0.00234761	4.72315e-16	TMC6	-2.71e-05	-0.0152669
17	76405736	76405736	rs4969143	T	C	0.373862	0.012434	0.001946	1.71e-10	563943	0.0122738	0.00194569	2.82298e-10	PGPS1	-0.0001602	-0.217712
17	79373962	79373962	rs34386017	A	G	0.29367	0.012941	0.00216	2.15e-09	509026	0.0127537	0.00215964	3.51631e-09	TM105	-0.0001873	-0.213649
17	79768848	79768848	rs2272030	G	A	0.18506	-0.01689	0.002559	4.24e-11	510090	-0.0167816	0.00255858	5.41893e-11	GLR	0.0001084	-0.106548
17	81054079	81054079	rs34403018	T	C	0.34898	-0.016694	0.002064	6.37e-16	499953	-0.0166472	0.00206366	7.21444e-16	METRL	4.68e-05	-0.0540632
18	11997350	11997350	rs7244849	G	A	0.257708	-0.014009	0.002115	3.65e-11	563944	-0.0141569	0.00211465	2.16199e-11	IMPA2	-0.0001479	0.227439
18	12564420	12564420	rs34737110	A	G	0.089757	-0.018947	0.003232	4.67e-09	563943	-0.0188336	0.0032315	5.60493e-09	SPIR1	0.0001134	-0.0792533
18	12830538	12830538	rs12971201	A	G	0.399646	-0.016759	0.001878	4.77e-19	563941	-0.0169192	0.00187768	2.04734e-19	PTN2	-0.0001602	0.367328
18	24393213	24393213	rs16942751	A	C	0.093176	-0.020039	0.003249	7.11e-10	563004	-0.0199306	0.00324844	8.4934e-10	AQP4	0.0001084	-0.077212
18	42299345	42299345	rs10468855	T	C	0.200159	0.013243	0.002336	1.48e-08	563001	0.0132553	0.00233563	1.38475e-08	SETBP	1.23e-05	0.0288903
18	42810533	42810533	rs12606193	T	C	0.189268	0.016422	0.002349	2.82e-12	563944	0.016183	0.00234863	5.56385e-12	UT2	-0.000239	-0.295126
18	43089644	43089644	rs35277578	G	A	0.100354	-0.025144	0.003084	3.72e-16	563946	-0.0251021	0.0030835	3.92746e-16	UT2	4.19e-05	-0.0235688
18	43777831	43777831	rs9947316	G	T	0.557175	-0.015513	0.001862	8.46e-17	563942	-0.0155105	0.00186168	7.98412e-17	CR025	2.5e-06	0.0251433
18	46207268	46207268	rs78415359	A	G	0.030279	-0.049627	0.005476	1.35e-19	563943	-0.0497576	0.00547512	1.00918e-19	CTIF	-0.0001306	0.126365
18	46355117	46355117	rs9960798	T	C	0.109683	0.025877	0.00296	2.43e-18	563001	0.0260027	0.00295954	1.54911e-18	CTIF	0.0001257	0.195524
18	46399092	46399092	rs62103337	A	G	0.284572	-0.013268	0.002102	2.84e-10	563003	-0.0133666	0.00210166	2.0174e-10	CTIF	-9.86e-05	0.148526
18	46449565	46449565	rs58920878	G	C	0.439122	-0.010799	0.001878	9.1e-09	563000	-0.0107694	0.0018777	9.72595e-09	SMAD7	2.96e-05	-0.0288906
18	46460903	46460903	rs2337106	C	G	0.481509	0.019717	0.001866	4.64e-26	563907	0.0197811	0.00186568	2.89758e-26	SMAD7	6.41e-05	0.204483
18	47193943	47193943	rs34770920	G	C	0.375613	0.012284	0.001929	1.99e-10	563004	0.0123259	0.0019287	1.65037e-10	LIPE	4.19e-05	0.0812718
18	47552802	47552802	rs72913861	A	C	0.155014	-0.014128	0.002554	3.23e-08	563946	-0.0141453	0.00255361	3.03653e-08	MYO5B	-1.73e-05	0.0268249
18	60104170	60104170	rs9953010	T	C	0.301079	-0.011236	0.002046	4.07e-08	562363	-0.0112163	0.00204565	4.18193e-08	TNR11	1.97e-05	-0.0117823
19	798562	798562	rs117432480	C	G	0.044519	0.035607	0.004774	9.18e-14	503969	0.035607	0.00477323	8.67005e-14	PTBP1	0	0.0248211
19	807442	807442	rs123698	G	C	0.393285	-0.028592	0.002001	2.88e-46	502883	-0.0286019	0.00200066	2.31117e-46	PTBP1	-9.9e-06	0.0955606
19	1010973	1010973	rs8100391	A	G	0.236316	-0.014144	0.002324	1.19e-09	487603	-0.0140947	0.00232362	1.31263e-09	MBRL	4.93e-05	-0.0425954
19	1435771	1435771	rs3760994	A	G	0.495207	0.015085	0.001959	1.4e-14	505587	0.0150924	0.00195866	1.30379e-14	DAZP1	7.4e-06	0.0309204
19	2116649	2116649	rs2074960	G	A	0.216059	-0.014434	0.002376	1.27e-09	493758	-0.0145104	0.0023756	1.00834e-09	AP3D1	-7.64e-05	0.100197
19	2163771	2163771	rs36065733	G	T	0.474727	0.03001	0.001937	4.21e-54	510095	0.0301036	0.00193668	1.74902e-54	AP3D1	9.36e-05	0.381487
19	2187197	2187197	rs149949550	T	G	0.016217	0.048163	0.008077	2.54e-09	502154	0.0484735	0.00807568	1.94415e-09	DOT1L	0.0003105	0.116104
19	4366219	4366219	rs732716	G	A	0.291866	-0.022714	0.002074	6.86e-28	563937	-0.0228545	0.00207364	3.01316e-28	SH3G1	-0.0001405	0.357302
19	4464124	4464124	rs28859427	G	A	0.171907	-0.017973	0.002666	1.63e-11	510109	-0.0181356	0.00266555	1.01949e-11	UBXN6	-0.0001626	0.203805
19	4502201	4502201	rs8887	C	T	0.569438	0.02991	0.001971	6.01e-52	507430	0.030011	0.00197066	2.27309e-52	HDGR2	0.000101	0.422258
19	4511278	4511278	rs10422078	T	C	0.431784	-0.018819	0.002257	7.88e-17	464308	-0.0188781	0.00225662	5.97638e-17	PLIN4	-5.91e-05	0.120088
19	11412496	11412496	rs78773589	T	C	0.004277	0.080291	0.014681	4.63e-08	552445	0.0802368	0.0146784	4.59469e-08	TSN16	-5.42e-05	0.00332478
19	13128861	13128861	rs10410950	A	G	0.050917	-0.027842	0.004234	5e-11	563943	-0.0279529	0.00423327	4.02507e-11	NFIX	-0.0001109	0.0941966
19	14174535	14174535	rs73508199	C	T	0.379201	0.011515	0.002016	1.15e-08	502876	0.0116136	0.00201567	8.32997e-09	PALM3	9.86e-05	0.140054
19	17422036	17422036	rs10423120	G	A	0.185006	0.015815	0.002483	1.95e-10	510062	0.0159185	0.0024826	1.43596e-10	DDA1	0.0001035	0.132892
19	18429163	18429163	rs73925443	A	G	0.061169	0.024487	0.004045	1.45e-09	510124	0.0244352	0.00404435	1.52385e-09	LSM4	-5.18e-05	-0.0215742
19	19320825	19320825	rs150057262	G	C	0.012131	0.053246	0.009664	3.68e-08	506608	0.0534801	0.00966242	3.11487e-08	NCAN	0.0002341	0.0724079
19	19379549	19379549	rs58542926	T	C	0.074553	0.028746	0.003577	9.67e-16	562361	0.0288347	0.00357642	7.47834e-16	TM6S2	8.87e-05	0.111621
19	19777644	19777644	rs55831814	T	C	0.216537	-0.012545	0.002252	2.6e-08	563881	-0.0124193	0.00225164	3.47449e-08	ZN101	0.0001257	-0.125918
19	32594869	32594869	rs3816053	A	G	0.429148	0.01253	0.001877	2.56e-11	562360	0.0125152	0.00187668	2.57866e-11	ZN507	-1.48e-05	-0.00315412
19	33073431	33073431	rs4499344	G	A	0.703726	-0.014947	0.002032	1.99e-13	562362	-0.0150061	0.00203165	1.51119e-13	PDCD5	-5.91e-05	0.119534
19	33193162	33193162	rs113282417	C	G	0.01742	-0.040786	0.007339	2.8e-08	560406	-0.0406603	0.00733785	3.00446e-08	NUD19	0.0001257	-0.0306084
19	33360369	33360369	rs7252778	A	C	0.602822	0.018727	0.001885	3.12e-23	563942	0.0187245	0.0018847	2.93057e-23	BAT1	-2.5e-06	0.0272025
19	33753807	33753807	rs34420519	A	C	0.114839	-0.021682	0.003058	1.39e-12	509180	-0.0216302	0.0030575	1.49991e-12	CEBPA	5.18e-05	-0.0330504
19	33754548	33754548	rs78744187	T	C	0.082111	0.034659	0.003538	1.26e-22	509179	0.0346023	0.00353742	1.34801e-22	CEBPA	-5.67e-05	-0.0293226
19	33800006	33800006	rs111346021	T	G	0.067484	-0.027268	0.003854	1.55e-12	563940	-0.0274873	0.0038534	9.80118e-13	CEBPA	-0.0002193	0.199053
19	33804399	33804399	rs8100151	G	C	0.140424	0.015243	0.00268	1.32e-08	560783	0.0150631	0.00267954	1.89286e-08	CEBPA	-0.0001799	-0.156545
19	35633635	35633635	rs61753924	T	C	0.009404	0.058046	0.009663	1.94e-09	558191	0.0581101	0.00966144	1.80287e-09	PLM	6.41e-05	0.0318373
19	35800662	35800662	rs10411704	G	T	0.207933	0.014413	0.002315	4.92e-10	560786	0.0144081	0.0023146	4.81974e-10	MAG	-4.9e-06	0.00894149
19	35950523	35950523	rs12975762	G	A	0.291332	-0.01611	0.002031	2.28e-15	563938	-0.0160706	0.00203065	2.49278e-15	FFAR2	3.94e-05	-0.0387491
19	39172220	39172220	rs8103530	G	A	0.071342	-0.021293	0.003599	3.4e-09	559844	-0.0213891	0.00359838	2.77995e-09	ACTN4	-9.61e-05	0.0874419
19	41147576	41147576	rs3097226	T	G	0.476154	0.020068	0.001905	6.47e-26	563942	0.0200926	0.00190469	5.13221e-26	LTBP4	2.46e-05	0.1006
19	41168213	41168213	rs143500787	T	G	0.004918	0.081555	0.014414	1.57e-08	554105	0.0809365	0.0144118	1.95432e-08	NUMBL	-0.0006185	-0.095096
19	41191725	41191725	rs45503691	A	G	0.011743	0.056236	0.008689	9.99e-11	561445	0.0561177	0.00868762	1.05048e-10	NUMBL	-0.0001183	-0.0218223
19	41225894	41225894	rs144859599	G	A	0.004138	-0.093893	0.014737	1.94e-10	559045	-0.0946988	0.0147348	1.30234e-10	IP3KC	-0.0008058	0.173077
19	41305065	41305065	rs192191487	A	G	0.017926	0.078613	0.008312	3.37e-21	508100	0.0784799	0.00831062	3.61132e-21	EGLN2	-0.0001331	-0.0300361
19	41305138	41305138	rs184088518	T	G	0.022571	-0.110859	0.006504	4.28e-65	563928	-0.11064	0.00650296	6.49529e-65	EGLN2	0.000219	-0.181155
19	41306650	41306650	rs61750953	T	C	0.015338	-0.090721	0.007563	4.11e-33	563295	-0.0913124	0.00756181	1.4234e-33	EGLN2	-0.0005914	0.460515
19	41424757	41424757	rs190831573	A	G	0.002932	-0.126202	0.020679	1.07e-09	547241	-0.126288	0.0206757	1.00862e-09	CP2A7	-8.6e-05	0.0256562
19	44278781	44278781	rs563995	A	G	0.228703	0.024952	0.002257	2.26e-28	562860	0.0249495	0.00225664	2.04917e-28	KCNN4	-2.5e-06	0.0425304
19	44323475	44323475	rs77979650	C	T	0.128742	0.016816	0.002739	8.53e-10	563820	0.016853	0.00273858	7.55989e-10	LYPD5	3.7e-05	0.0524336
19	45715976	45715976	rs3803906	G	A	0.345824	0.022627	0.00196	8.59e-31	562797	0.0224397	0.00195969	2.33377e-30	EX3L2	-0.0001873	-0.434065
19	45765999	45765999	rs12974762	T	C	0.282952	-0.01192	0.002068	8.36e-09	563939	-0.011713	0.00206767	1.4717e-08	MARK4	0.000207	-0.245613
19	45809208	45809208	rs8111989	C	T	0.306379	0.017876	0.002009	6.15e-19	562996	0.0176468	0.00200865	1.558e-18	KCRM	-0.0002292	-0.403692
19	46277288	46277288	rs4803854	C	A	0.53683	0.01369	0.001852	1.52e-13	562065	0.0136161	0.00185171	1.93439e-13	DMPK	-7.39e-05	-0.1047
19	46414293	46414293	rs10406475	G	T	0.173821	-0.014068	0.002431	7.34e-09	560783	-0.0141198	0.00243062	6.28005e-09	NANO2	-5.18e-05	0.067733
19	46878629	46878629	rs4803936	A	G	0.304543	-0.013882	0.002	4.01e-12	563943	-0.0139461	0.00199966	3.07592e-12	PPP5	-6.41e-05	0.115169
19	47559438	47559438	rs60118491	A	G	0.626164	-0.017165	0.002021	2.09e-17	508980	-0.0175568	0.00202067	3.66869e-18	TM160	-0.0003918	0.755635
19	47625315	47625315	rs309193	T	C	0.200694	0.022826	0.002349	2.75e-22	563941	0.0232819	0.00234859	3.65021e-23	SAE1	0.0004559	0.877015
19	47755305	47755305	rs10420906	A	G	0.309242	0.013685	0.002023	1.39e-11	563926	0.0137096	0.00202268	1.21895e-11	CCDC9	2.46e-05	0.0570289
19	47832346	47832346	rs142272927	T	C	0.055822	0.025759	0.004172	6.87e-10	563925	0.0257639	0.00417134	6.5575e-10	C5AR2	4.9e-06	0.0202184
19	49209566	49209566	rs1704773	G	A	0.524158	-0.013793	0.001854	1.05e-13	561282	-0.0137412	0.00185371	1.23612e-13	FUT2	5.18e-05	-0.0708713
19	49960666	49960666	rs140005264	T	G	0.030198	0.03014	0.005481	3.92e-08	563909	0.0302336	0.00548013	3.44916e-08	A16A1	9.36e-05	0.0555727
19	50017538	50017538	rs150420714	C	G	0.008626	0.085091	0.01049	5.25e-16	506944	0.0855198	0.0104883	3.52552e-16	FCGRN	0.0004288	0.172936
19	50025208	50025208	rs117080418	A	T	0.010609	0.066418	0.010035	3.75e-11	495472	0.0663293	0.0100334	3.82046e-11	FCGRN	-8.87e-05	-0.00808439
19	50084596	50084596	rs3760708	C	G	0.235164	0.026256	0.00222	3.05e-32	563942	0.0262683	0.00221964	2.58847e-32	NOSIP	1.23e-05	0.0712567
19	50099218	50099218	rs143035740	A	G	0.013941	-0.051851	0.008436	8.18e-10	509477	-0.0520974	0.00843463	6.5491e-10	PRR12	-0.0002464	0.0965717
19	50177171	50177171	rs3745469	A	G	0.090597	0.026099	0.003328	4.65e-15	559200	0.0260867	0.00332744	4.51065e-15	B2L12	-1.23e-05	0.0132138
19	50988865	50988865	rs12978280	T	C	0.039717	0.034226	0.00506	1.4e-11	510120	0.0344034	0.00505917	1.04466e-11	EMC10	0.0001774	0.127153
19	56831508	56831508	rs7245993	G	A	0.447076	0.010535	0.001861	1.54e-08	562361	0.0105128	0.00186068	1.60457e-08	ZSA5A	-2.22e-05	-0.0178379
20	3305210	3305210	rs6139076	C	T	0.232814	0.014609	0.002211	4.02e-11	547594	0.0146016	0.00221064	3.97117e-11	CT194	-7.4e-06	0.00530757
20	4142839	4142839	rs78839561	A	G	0.398023	0.012929	0.001928	2.09e-11	562856	0.0129044	0.0019277	2.16887e-11	SMOX	-2.46e-05	-0.0160872
20	8633262	8633262	rs8115504	A	G	0.218373	-0.013182	0.002237	3.93e-09	562858	-0.013219	0.00223665	3.41752e-09	PLCB1	-3.7e-05	0.0606815
20	10624046	10624046	rs3817996	A	G	0.263826	-0.015566	0.002114	1.87e-13	563942	-0.0154797	0.00211364	2.41173e-13	JAG1	8.63e-05	-0.110487
20	10683471	10683471	rs2057053	T	G	0.432408	0.013057	0.001866	2.74e-12	562360	0.0130619	0.00186568	2.53837e-12	JAG1	4.9e-06	0.0331956
20	10974785	10974785	rs6108789	G	C	0.515414	0.010649	0.001853	9.4e-09	560786	0.0106983	0.00185268	7.71878e-09	CT187	4.93e-05	0.0855792
20	11177055	11177055	rs34952318	A	G	0.050308	0.035365	0.004384	7.58e-16	563943	0.0355252	0.00438331	5.28959e-16	CT187	0.0001602	0.156247
20	25268661	25268661	rs753009	T	C	0.181044	-0.015228	0.002406	2.56e-10	563942	-0.0153537	0.00240562	1.74322e-10	PYGB	-0.0001257	0.166888
20	25333027	25333027	rs1962310	T	C	0.25469	0.014889	0.002113	1.92e-12	562854	0.0146352	0.00211267	4.28848e-12	ABD12	-0.0002538	-0.349002
20	25849693	25849693	rs67051989	G	A	0.182732	-0.015282	0.002419	2.76e-10	562529	-0.0153633	0.00241862	2.12391e-10	F182B	-8.13e-05	0.113773
20	39678289	39678289	rs6016505	C	T	0.452782	-0.014733	0.001852	1.89e-15	563943	-0.0148045	0.00185168	1.29422e-15	TOP1	-7.15e-05	0.164454
20	42529720	42529720	rs765356	T	C	0.255653	0.013563	0.002123	1.72e-10	563943	0.0134275	0.00212264	2.51876e-10	TOX2	-0.0001355	-0.165658
20	43038249	43038249	rs6031587	T	C	0.072466	0.028923	0.00367	3.43e-15	563001	0.0289698	0.00366936	2.90156e-15	HNF4A	4.68e-05	0.0726626
20	43042364	43042364	rs1800961	T	C	0.031107	0.074343	0.005326	3.06e-44	559201	0.0743134	0.00532508	2.91784e-44	HNF4A	-2.96e-05	0.02066
20	44726237	44726237	rs1569722	T	C	0.325518	0.011364	0.001979	9.5e-09	560781	0.0114231	0.00197868	7.78229e-09	NCOA5	5.91e-05	0.0866162
20	48981014	48981014	rs6063504	G	C	0.49408	0.015681	0.001848	2.3e-17	563945	0.0157722	0.00184771	1.38855e-17	PTN1	9.12e-05	0.219166
20	49101590	49101590	rs6126019	T	C	0.452599	-0.021331	0.001855	1.47e-30	563929	-0.0214345	0.00185471	6.81875e-31	PTN1	-0.0001035	0.333613
20	49238645	49238645	rs2426171	C	T	0.242917	0.016844	0.002309	3.13e-13	509034	0.0168908	0.0023086	2.54573e-13	FA65C	4.68e-05	0.089732
20	52560126	52560126	rs1055253	G	A	0.417471	-0.010593	0.001869	1.49e-08	562361	-0.0105536	0.00186868	1.6269e-08	BCAS1	3.94e-05	-0.0381746
20	52742047	52742047	rs35194449	T	C	0.198376	-0.01321	0.002317	1.22e-08	563945	-0.0132322	0.00231664	1.11784e-08	CP24A	-2.22e-05	0.0379802
20	55986326	55986326	rs150196269	A	G	0.006553	0.08181	0.012266	2.66e-11	506179	0.0823768	0.012264	1.85547e-11	RBM38	0.0005668	0.156428
20	55990405	55990405	rs737092	T	C	0.509989	-0.013115	0.001894	4.6e-12	563001	-0.0129869	0.00189367	6.98167e-12	RBM38	0.0001281	-0.181201
20	56119037	56119037	rs6070139	A	G	0.40291	-0.023419	0.001878	1.16e-35	562999	-0.0233278	0.0018777	1.94548e-35	PCKGC	9.12e-05	-0.224569
20	56138040	56138040	rs2070755	C	G	0.502434	0.019156	0.001864	9.45e-25	563941	0.019193	0.00186368	7.16213e-25	PCKGC	3.7e-05	0.12039
20	57237670	57237670	rs218476	A	G	0.377115	0.012819	0.001913	2.14e-11	563937	0.0127697	0.0019127	2.45109e-11	STX16	-4.93e-05	-0.0589455
20	57594684	57594684	rs34524896	T	C	0.048544	0.030464	0.004372	3.32e-12	562972	0.0301264	0.0043713	5.50646e-12	TBB1	-0.0003376	-0.219734
20	60959030	60959030	rs117458001	T	A	0.030422	-0.031404	0.005704	3.77e-08	510092	-0.0313399	0.00570307	3.90116e-08	RS21	6.41e-05	-0.0148524
20	61024609	61024609	rs6061538	C	T	0.267599	0.013144	0.002182	1.75e-09	509032	0.0131218	0.00218165	1.80292e-09	GATA5	-2.22e-05	-0.0129384
20	61037490	61037490	rs4925184	G	A	0.071994	-0.032411	0.003784	1.13e-17	507454	-0.0324406	0.00378333	9.94192e-18	GATA5	-2.96e-05	0.0556082
20	62281505	62281505	rs147522398	C	G	0.279033	0.013213	0.002183	1.46e-09	508918	0.0131662	0.00218265	1.6174e-09	STMN3	-4.68e-05	-0.0444646
20	62483993	62483993	rs1923032	A	G	0.303639	0.013661	0.002159	2.55e-10	510120	0.0135945	0.00215864	3.0211e-10	ABHGB	-6.65e-05	-0.0736249
21	16339172	16339172	rs2229742	C	G	0.103421	-0.02501	0.003033	1.73e-16	562359	-0.0248843	0.00303247	2.28772e-16	NRIP1	0.0001257	-0.121357
21	16499656	16499656	rs2823074	C	A	0.170689	-0.019964	0.002488	1.07e-15	563001	-0.0199467	0.00248757	1.06997e-15	NRIP1	1.73e-05	1.21767e-05
21	16578159	16578159	rs1997595	C	A	0.34112	-0.030639	0.001956	3.11e-55	563942	-0.030671	0.00195566	1.97136e-55	NRIP1	-3.2e-05	0.197994
21	16716430	16716430	rs146254580	G	A	0.017984	-0.052548	0.007288	5.82e-13	563946	-0.0526047	0.00728683	5.23173e-13	NRIP1	-5.67e-05	0.0462777
21	16798091	16798091	rs2403966	T	G	0.302375	-0.026561	0.002014	1.16e-39	560781	-0.0264969	0.00201366	1.51883e-39	UBP25	6.41e-05	-0.117051
21	19165942	19165942	rs2824493	T	C	0.342699	-0.010931	0.001946	2e-08	560788	-0.0109113	0.00194569	2.04774e-08	EURL	1.97e-05	-0.0102448
21	30691325	30691325	rs1153293	T	C	0.379773	-0.01193	0.001909	4.27e-10	560784	-0.0119744	0.0019087	3.52903e-10	BACH1	-4.44e-05	0.0827725
21	35295039	35295039	rs13052598	G	C	0.096693	0.029254	0.003124	8.13e-21	563754	0.0292047	0.00312352	8.77037e-21	ATPO	-4.93e-05	-0.0329274
21	35356706	35356706	rs2834317	A	G	0.153457	-0.034984	0.002579	7.02e-42	560784	-0.0349199	0.00257856	8.78549e-42	ATPO	6.41e-05	-0.0974289
21	35390852	35390852	rs16997893	C	T	0.396448	-0.013376	0.001888	1.46e-12	559202	-0.0133242	0.00188767	1.68239e-12	RT06	5.18e-05	-0.0615738
21	36450841	36450841	rs8133974	T	C	0.143289	0.018153	0.002625	4.82e-12	563004	0.0180322	0.0026246	6.39917e-12	RUNX1	-0.0001208	-0.123077
21	37706092	37706092	rs182410533	G	T	0.035096	-0.038525	0.005169	9.48e-14	560444	-0.0387443	0.00516818	6.54426e-14	MORC3	-0.0002193	0.160948
21	37834258	37834258	rs128494	T	C	0.237857	-0.03245	0.002208	7.49e-49	562358	-0.0324796	0.00220761	5.35584e-49	CLD14	-2.96e-05	0.145654
21	38021157	38021157	rs57655466	C	A	0.310273	-0.015238	0.002011	3.73e-14	561504	-0.0153144	0.00201069	2.60655e-14	SIM2	-7.64e-05	0.155643
21	38053400	38053400	rs79240861	C	A	0.174095	0.017391	0.002447	1.23e-12	563943	0.0174822	0.00244661	8.969e-13	SIM2	9.12e-05	0.137161
21	38055216	38055216	rs2835435	T	C	0.222799	-0.031003	0.002261	9.29e-43	558117	-0.0311262	0.00226064	3.92852e-43	SIM2	-0.0001232	0.373787
21	38078280	38078280	rs77659217	T	C	0.191009	0.01668	0.002477	1.71e-11	508095	0.0167244	0.00247659	1.44836e-11	SIM2	4.44e-05	0.0721196
21	38168446	38168446	rs12481910	C	T	0.08415	-0.023014	0.003336	5.47e-12	563943	-0.0229006	0.00333544	6.60965e-12	BPL1	0.0001134	-0.0821911
21	38227720	38227720	rs145784836	T	C	0.066293	-0.020744	0.003735	2.86e-08	563923	-0.0207908	0.00373442	2.58643e-08	BPL1	-4.68e-05	0.0436653
21	39865855	39865855	rs9982370	T	C	0.233814	0.015092	0.002188	5.47e-12	563943	0.0149663	0.00218762	7.8445e-12	ERG	-0.0001257	-0.156578
21	40468838	40468838	rs4817988	A	G	0.274347	0.015718	0.002084	4.76e-14	562535	0.0156835	0.00208368	5.19887e-14	PSMG1	-3.45e-05	-0.038302
21	45699580	45699580	rs9784210	A	C	0.359512	0.011948	0.002025	3.74e-09	509180	0.0119357	0.00202467	3.74391e-09	AIRE	-1.23e-05	-0.000453798
21	45743594	45743594	rs12482028	C	T	0.23536	-0.012775	0.002317	3.62e-08	510121	-0.0127898	0.00231662	3.37311e-08	K6PL	-1.48e-05	0.0306781
21	45746102	45746102	rs17850433	C	T	0.011806	-0.059444	0.009011	4.34e-11	503325	-0.0595105	0.00900954	3.9676e-11	K6PL	-6.65e-05	0.0389618
22	18233525	18233525	rs181406	G	C	0.340816	-0.011752	0.002021	6.23e-09	563940	-0.0116189	0.00202067	8.92232e-09	BID	0.0001331	-0.15599
22	21982892	21982892	rs2298428	T	C	0.181297	-0.015624	0.00243	1.31e-10	563001	-0.0157324	0.00242958	9.45797e-11	YDJC	-0.0001084	0.141473
22	22268759	22268759	rs5756052	G	A	0.484215	-0.012324	0.001866	4.15e-11	563940	-0.0123462	0.0018657	3.65466e-11	PPM1F	-2.22e-05	0.0552011
22	28430952	28430952	rs73166782	T	A	0.030519	-0.039639	0.005494	5.62e-13	563942	-0.0398657	0.00549314	3.94708e-13	TTC28	-0.0002267	0.15346
22	28657013	28657013	rs134196	T	C	0.326872	0.012763	0.001967	9.01e-11	563945	0.0128714	0.00196666	5.95704e-11	TTC28	0.0001084	0.179694
22	28989438	28989438	rs2145160	C	T	0.031442	-0.035922	0.005461	4.94e-11	560912	-0.0361241	0.00546015	3.6918e-11	TTC28	-0.0002021	0.126489
22	29203314	29203314	rs5762813	T	C	0.185095	-0.025213	0.002366	1.74e-26	563939	-0.0251785	0.00236562	1.86963e-26	XBP1	3.45e-05	-0.0312064
22	29977229	29977229	rs71640299	A	G	0.04931	-0.023489	0.004281	4.18e-08	563004	-0.0236886	0.00428032	3.12467e-08	NIPS1	-0.0001996	0.126372
22	30169871	30169871	rs145046103	C	T	0.092375	0.027678	0.003188	4.14e-18	563942	0.027508	0.0031875	6.13796e-18	QCR9	-0.00017	-0.171024
22	30308180	30308180	rs1544432	G	T	0.250492	-0.020031	0.002124	4.3e-21	563944	-0.0200828	0.00212367	3.18004e-21	MTMR3	-5.18e-05	0.131036
22	30529741	30529741	rs5753021	A	G	0.120172	-0.017737	0.002854	5.27e-10	559197	-0.0176926	0.00285351	5.63511e-10	HORM2	4.44e-05	-0.0290918
22	30868418	30868418	rs714456	C	A	0.288714	-0.011854	0.002054	8.06e-09	562996	-0.0118367	0.00205365	8.22575e-09	S14L3	1.73e-05	-0.00884046
22	30956122	30956122	rs35908001	T	C	0.0786	0.026571	0.003549	7.39e-14	563886	0.0266277	0.00354845	6.18824e-14	G3ST1	5.67e-05	0.0770773
22	36545137	36545137	rs132642	A	T	0.166815	0.01612	0.002469	6.79e-11	563945	0.0158711	0.00246858	1.28238e-10	APOL3	-0.0002489	-0.276147
22	36766481	36766481	rs2413399	G	A	0.682578	-0.01563	0.001988	3.92e-15	562861	-0.015598	0.00198766	4.24702e-15	MYH9	3.2e-05	-0.0347982
22	37333367	37333367	rs7292430	A	G	0.023018	-0.044852	0.006504	5.53e-12	563938	-0.0445045	0.00650296	7.71546e-12	IL3RB	0.0003475	-0.144637
22	37374285	37374285	rs12165519	G	C	0.050507	-0.051272	0.004237	1.14e-33	563945	-0.0513114	0.00423634	9.10046e-34	TEX33	-3.94e-05	0.0978415
22	37400198	37400198	rs75204614	T	C	0.030954	-0.071948	0.005533	1.27e-38	563942	-0.0716646	0.00553211	2.22175e-38	TEX33	0.0002834	-0.242891
22	37411733	37411733	rs140768200	G	T	0.021683	-0.052653	0.006699	4.01e-15	563946	-0.0527417	0.00669794	3.42617e-15	THTR	-8.87e-05	0.0683355
22	37413607	37413607	rs9622534	C	T	0.148029	0.02275	0.00266	1.26e-17	562860	0.0228412	0.00265959	8.83183e-18	THTR	9.12e-05	0.15432
22	37416824	37416824	rs138159140	T	C	0.021988	0.046046	0.006565	2.41e-12	563942	0.0460509	0.00656396	2.28754e-12	THTM	4.9e-06	0.0226483
22	37417326	37417326	rs117329814	T	C	0.017933	-0.072046	0.007173	1.04e-23	562086	-0.0722185	0.00717184	7.51838e-24	THTM	-0.0001725	0.140909
22	37433654	37433654	rs12167572	T	C	0.007425	0.06961	0.012221	1.26e-08	507356	0.0691344	0.012219	1.53195e-08	THTM	-0.0004756	-0.084874
22	37462173	37462173	rs139105452	T	C	0.011391	-0.099718	0.009479	7.56e-26	509478	-0.0996662	0.00947748	7.28164e-26	TMPS6	5.18e-05	0.0162926
22	37470849	37470849	rs13056055	A	G	0.011836	-0.055068	0.008905	6.46e-10	563944	-0.0549152	0.00890357	6.92577e-10	TMPS6	0.0001528	-0.0302355
22	37471057	37471057	rs149728170	A	T	0.010545	0.054471	0.009568	1.28e-08	561887	0.0546312	0.00956648	1.12522e-08	TMPS6	0.0001602	0.0559725
22	37490572	37490572	rs73160067	G	A	0.012741	-0.065857	0.008688	3.6e-14	562195	-0.066133	0.00868661	2.67362e-14	TMPS6	-0.000276	0.129203
22	38606989	38606989	rs8139952	A	C	0.53561	0.014026	0.001877	8.17e-14	563938	0.0141911	0.0018767	3.97712e-14	MAFF	0.0001651	0.312653
22	39075434	39075434	rs9607566	G	C	0.287072	-0.016001	0.002032	3.61e-15	563944	-0.0160281	0.00203168	3.04404e-15	TOM22	-2.71e-05	0.0740568
22	39527935	39527935	rs139384	C	T	0.402705	0.014504	0.001904	2.69e-14	563942	0.0145755	0.00190371	1.91273e-14	CBX7	7.15e-05	0.148099
22	39687484	39687484	rs54211	A	G	0.106195	0.019317	0.00306	2.82e-10	559202	0.0195191	0.00305947	1.77227e-10	RL3	0.0002021	0.201719
22	43114551	43114551	rs8138197	A	G	0.473596	0.02714	0.001889	9.7e-47	562850	0.0270981	0.0018887	1.10404e-46	A4GAT	-4.19e-05	-0.0562131
22	44324727	44324727	rs738409	G	C	0.217408	0.032669	0.002258	2.12e-47	562358	0.0328711	0.00225761	5.03915e-48	PLPL3	0.0002021	0.623979
22	44361713	44361713	rs12165526	A	T	0.098716	0.023035	0.003138	2.23e-13	563000	0.0230966	0.00313752	1.81951e-13	SAM50	6.16e-05	0.0883504
22	45977415	45977415	rs16994265	T	C	0.088319	0.031946	0.003366	2.43e-21	559846	0.0318573	0.00336541	2.90541e-21	FBLN1	-8.87e-05	-0.0776012
22	45990593	45990593	rs62225057	A	G	0.043743	-0.025851	0.004696	3.78e-08	561852	-0.0260654	0.00469525	2.83334e-08	FBLN1	-0.0002144	0.125193
22	46023811	46023811	rs11704204	C	T	0.006635	0.06515	0.01185	3.94e-08	563300	0.0654457	0.011848	3.31758e-08	FBLN1	0.0002957	0.0746748
22	46042979	46042979	rs5765558	G	A	0.396906	-0.016298	0.001895	8.53e-18	559201	-0.0163498	0.00189467	6.17102e-18	ATX10	-5.18e-05	0.140592
22	46292665	46292665	rs62226013	A	G	0.006426	-0.073077	0.012387	3.75e-09	510123	-0.0726088	0.012385	4.5556e-09	WNT7B	0.0004682	-0.0845143
22	46324933	46324933	rs56079916	C	G	0.357661	0.023177	0.002056	1.91e-29	496387	0.0231203	0.00205566	2.39178e-29	WNT7B	-5.67e-05	-0.0976879
22	46371079	46371079	rs73175081	G	A	0.315161	0.031542	0.002126	9.54e-50	493092	0.0315198	0.00212565	9.6123e-50	WNT7B	-2.22e-05	-0.00327894
22	46380593	46380593	rs73446600	G	T	0.437086	0.017483	0.002205	2.34e-15	450558	0.0174657	0.00220462	2.33076e-15	WNT7B	-1.73e-05	0.0017183
22	46387296	46387296	rs112022355	C	T	0.017611	-0.051537	0.007445	4.61e-12	510119	-0.0518475	0.00744376	3.27867e-12	WNT7B	-0.0003105	0.148003
Missing loci after adjustment
CHR	POS	POS	SNP	A1	A2	freq	b	se	p	N	bC	bC_se	bC_pval	NearestGene	dBeta	dP
1	93468092	93468092	rs11164857	C	T	0.111586	0.016329	0.002983	4.51e-08	563945	0.0162255	0.00298249	5.32072e-08	FA69A	-0.0001035	-0.0717939
1	112145503	112145503	rs12045658	C	T	0.23541	0.011899	0.002165	3.98e-08	563943	0.0117437	0.00216467	5.78932e-08	RAP1A	-0.0001553	-0.162744
6	33272054	33272054	rs41266733	A	G	0.007259	-0.063365	0.011566	4.39e-08	560433	-0.0627465	0.0115642	5.76597e-08	TPSN	0.0006185	-0.118408
7	74073590	74073590	rs73137144	G	A	0.189556	0.013115	0.002374	3.4e-08	563898	0.012807	0.00237362	6.83171e-08	GTF2I	-0.000308	-0.303051
15	73326961	73326961	rs12903656	C	G	0.100762	-0.017015	0.003066	2.95e-08	562856	-0.0166256	0.00306552	5.84678e-08	NEO1	0.0003894	-0.297095
18	24449049	24449049	rs151245	G	T	0.395547	0.010356	0.001887	4.18e-08	562360	0.0102845	0.00188668	5.00536e-08	AQP4	-7.15e-05	-0.078259

## Sheet: Supp Table 5
New loci after adjustment
CHR	POS	POS	SNP	A1	A2	freq	b	se	p	N	bC	bC_se	bC_pval	NearestGene	dBeta	dP
1	6355358	6355358	rs7554077	A	G	0.091579	-0.012038	0.003337	0.000312	506966	-0.0211366	0.00366156	7.80671e-09	BACH	-0.0090986	4.60169
1	22447316	22447316	rs3765350	G	A	0.218196	0.004502	0.002231	0.043674	561913	0.0137745	0.00249788	3.49869e-08	WNT4	0.0092725	6.09632
1	23693167	23693167	rs10917374	C	G	0.070877	-0.018522	0.003576	2.27e-07	563943	-0.0306172	0.00397073	1.25088e-14	ZN436	-0.0120952	7.25881
1	46165539	46165539	rs116792274	T	C	0.037297	0.024516	0.004899	5.71e-07	561146	0.0314301	0.00558675	1.84614e-08	IPP	0.0069141	1.49037
1	46940089	46940089	rs11211288	T	C	0.217271	0.010917	0.002247	1.21e-06	560786	0.0150507	0.00256685	4.53283e-09	DMBX1	0.0041337	2.42642
1	67388945	67388945	rs78884052	C	T	0.023472	0.025047	0.006118	4.28e-05	563945	0.0381105	0.00697876	4.73645e-08	WDR78	0.0130635	2.95599
1	118174116	118174116	rs7541799	G	C	0.41311	0.009933	0.001869	1.09e-07	563941	0.0125534	0.00213619	4.18876e-09	FA46C	0.0026204	1.41534
1	119159978	119159978	rs35546571	A	T	0.038224	0.004495	0.004895	0.358487	563944	0.0364472	0.0055834	6.67478e-11	TBX15	0.0319522	9.73004
1	119450933	119450933	rs10923696	A	C	0.142559	-0.001413	0.002649	0.593621	560774	0.0162698	0.00291124	2.28882e-08	TBX15	0.0176828	7.4139
1	119516405	119516405	rs61806235	G	A	0.110833	0.001157	0.002928	0.692872	561852	-0.0207671	0.00336573	6.82237e-10	TBX15	-0.0219241	9.00672
1	119680851	119680851	rs77261529	A	T	0.046228	0.006394	0.004451	0.150861	563006	0.0451019	0.00498688	1.50877e-19	SYWM	0.0387079	18
1	155268131	155268131	rs180921974	G	T	0.022007	0.010442	0.006337	0.099389	560444	0.0399489	0.00724785	3.55134e-08	KPYR	0.0295069	6.44695
1	162075300	162075300	rs2225846	A	G	0.275076	-0.009252	0.00206	7.21e-06	563944	-0.0128694	0.00232494	3.10588e-08	CAPON	-0.0036174	2.36575
1	164529666	164529666	rs2275560	A	G	0.263036	-0.008019	0.002406	0.000866	559200	-0.0157742	0.00267467	3.68719e-09	PBX1	-0.0077552	5.37082
1	170352113	170352113	rs3119837	T	C	0.271549	0.001279	0.002072	0.537072	561852	0.0226813	0.00236323	8.18413e-22	GORAB	0.0214023	20.8171
1	170786995	170786995	rs7528013	C	T	0.245973	-0.004146	0.00213	0.051581	563942	-0.0133146	0.00244041	4.87304e-08	PRRX1	-0.0091686	6.02469
1	214137719	214137719	rs79923383	A	G	0.006053	0.059729	0.012506	1.82e-06	552364	0.0851897	0.0142692	2.37014e-09	PROX1	0.0254607	2.8853
1	219651779	219651779	rs2820430	T	C	0.301101	-0.00766	0.001997	0.000126	563941	0.014226	0.00221772	1.41091e-10	ZNT10	0.021886	5.95087
1	221390962	221390962	rs17009652	A	G	0.065285	-0.010845	0.003754	0.003875	563946	-0.023115	0.00417632	3.11632e-08	HLX	-0.01227	5.09463
1	234716506	234716506	rs955613	T	C	0.300078	-0.010311	0.002016	3.22e-07	562363	-0.0125174	0.00223404	2.10651e-08	I2BP2	-0.0022064	1.18429
2	13089732	13089732	rs779392	G	A	0.320724	-0.004795	0.001968	0.014868	559203	-0.013789	0.0021927	3.20344e-10	TRIB2	-0.008994	7.66664
2	44066247	44066247	rs11887534	C	G	0.066027	0.018769	0.003714	4.43e-07	562357	0.02642	0.00409032	1.05285e-10	ABCG8	0.007651	3.62404
2	106077608	106077608	rs13022140	G	A	0.411101	-0.010097	0.001974	3.19e-07	558761	-0.0119931	0.00219787	4.85075e-08	FHL2	-0.0018961	0.817982
2	112401160	112401160	rs11690715	T	C	0.628236	-0.008156	0.001908	1.94e-05	559838	-0.0119131	0.00216887	3.95649e-08	APC1	-0.0037571	2.69049
2	146224640	146224640	rs79141733	G	A	0.036555	0.021524	0.00492	1.23e-05	559847	0.0313713	0.00560435	2.17261e-08	ZEB2	0.0098473	2.75292
2	161761464	161761464	rs1710648	C	T	0.22511	-0.010926	0.002227	9.41e-07	559203	-0.0136156	0.00246816	3.45812e-08	TANK	-0.0026896	1.43475
2	164615800	164615800	rs17203738	A	G	0.267629	0.00898	0.002106	2.03e-05	559200	0.013116	0.00233779	2.01798e-08	FIGN	0.004136	3.00258
2	172298662	172298662	rs72882321	T	C	0.177644	-0.004851	0.002425	0.045523	559846	-0.0153294	0.002773	3.23746e-08	DCA17	-0.0104784	6.14803
2	202897368	202897368	rs2280509	T	C	0.184256	0.012494	0.002382	1.6e-07	559840	0.01522	0.00265398	9.76337e-09	FZD7	0.002726	1.21452
2	204366776	204366776	rs16839858	A	G	0.167935	0.012841	0.002475	2.16e-07	559198	0.0166976	0.00270966	7.17266e-10	RAPH1	0.0038566	2.47877
2	219779911	219779911	rs77157375	A	G	0.034173	0.019652	0.005118	0.000124	559848	0.0350186	0.00582726	1.86158e-09	WN10A	0.0153666	4.82354
3	4910072	4910072	rs148193460	G	C	0.032208	0.028982	0.005596	2.28e-07	563945	0.0447954	0.00637044	2.03953e-12	ITPR1	0.0158134	5.0484
3	11244906	11244906	rs433303	T	C	0.407812	0.007708	0.001908	5.4e-05	559698	0.0116008	0.00211482	4.12385e-08	HRH1	0.0038928	3.11709
3	12962914	12962914	rs56217149	A	G	0.15021	0.014048	0.002691	1.82e-07	510120	0.0207312	0.00305294	1.11691e-11	IQEC1	0.0066832	4.21205
3	25475117	25475117	rs7620632	C	T	0.144983	0.013585	0.002643	2.8e-07	561916	0.0164794	0.0029317	1.89744e-08	RARB	0.0028944	1.16899
3	25515820	25515820	rs35009785	T	C	0.513675	0.008435	0.001859	5.8e-06	561921	0.0118466	0.00212784	2.58515e-08	RARB	0.0034116	2.35094
3	25645514	25645514	rs1881708	A	G	0.300869	0.008815	0.002014	1.22e-05	562360	0.0122934	0.00223242	3.65511e-08	TOP2B	0.0034784	2.52346
3	30241417	30241417	rs4091244	C	T	0.380456	-0.009914	0.001908	2.08e-07	560444	-0.0125684	0.00211495	2.80491e-09	RBMS3	-0.0026544	1.87014
3	43427289	43427289	rs77431211	C	T	0.132909	-0.00908	0.00272	0.000846	562856	-0.0172829	0.00310552	2.61815e-08	ANO10	-0.0082029	4.50938
3	46659538	46659538	rs1474197	T	C	0.102301	0.012973	0.003249	6.6e-05	563006	0.0202801	0.00369139	3.93189e-08	TDGF1	0.0073071	3.22494
3	48198300	48198300	rs11130158	A	C	0.220868	0.009739	0.002455	7.36e-05	561919	0.0160766	0.0027701	6.49003e-09	MPIP1	0.0063376	4.05463
3	48484016	48484016	rs4858820	T	A	0.263094	0.009038	0.002202	4.11e-05	561433	0.0204121	0.00247299	1.53177e-16	TMA7	0.0113741	11.4286
3	48766111	48766111	rs73080339	G	A	0.065049	-0.016148	0.003864	2.96e-05	562859	-0.0259093	0.00440639	4.10424e-09	IP6K2	-0.0097613	3.85806
3	49053219	49053219	rs7100	A	G	0.231423	0.010301	0.002275	6.02e-06	562361	0.0219162	0.00250994	2.50716e-18	DALD3	0.0116152	12.3804
3	53259371	53259371	rs73840245	C	G	0.197809	-0.005299	0.002523	0.035746	509715	-0.0154667	0.002828	4.52299e-08	TKT	-0.0101677	5.8978
3	64681210	64681210	rs4688502	T	C	0.326629	0.002422	0.001963	0.217206	563942	0.0131412	0.0021884	1.91409e-09	ATS9	0.0107192	8.05491
3	64703394	64703394	rs66815886	T	G	0.280913	-0.003527	0.002043	0.084297	562997	0.0208751	0.00231054	1.64415e-19	ATS9	0.0244021	17.7099
3	64898094	64898094	rs1442029	T	C	0.224851	0.004605	0.002206	0.036839	562535	0.0138775	0.00245008	1.47776e-08	ATS9	0.0092725	6.3967
3	101136402	101136402	rs9859077	C	G	0.338825	-0.007457	0.001948	0.00013	563943	-0.0119397	0.00217551	4.05962e-08	SENP7	-0.0044827	3.50546
3	129329566	129329566	rs9845755	T	A	0.19777	0.003697	0.002341	0.114323	563932	0.024996	0.0026741	8.97962e-21	PLXD1	0.021299	19.1049
3	135607701	135607701	rs6772366	T	C	0.295731	0.008552	0.00203	2.54e-05	559203	0.0128259	0.00227239	1.65936e-08	P2R3A	0.0042739	3.18489
3	138117564	138117564	rs13083299	G	A	0.159266	-0.003128	0.002506	0.211969	563942	-0.0157113	0.00281374	2.35326e-08	RASM	-0.0125833	6.9546
3	146342762	146342762	rs17434399	A	G	0.014708	0.031668	0.007685	3.82e-05	562363	0.0477993	0.00874767	4.64928e-08	PLS5	0.0161313	2.91468
3	156795414	156795414	rs9817452	T	G	0.388089	0.006627	0.001912	0.000533	563942	0.0253735	0.00217206	1.57981e-31	LEKR1	0.0187465	27.5281
3	178100214	178100214	rs1441589	G	C	0.11887	0.013274	0.002864	3.62e-06	563942	0.0178226	0.003174	1.9634e-08	KCMB2	0.0045486	2.2657
3	183756426	183756426	rs6799766	T	C	0.421972	0.006606	0.001863	0.000394	563945	0.0118119	0.00213118	2.98277e-08	5HT3D	0.0052059	4.12088
3	197022240	197022240	rs3915512	T	A	0.275839	-0.007683	0.002062	0.000196	563945	-0.0129917	0.00229985	1.6144e-08	DLG1	-0.0053087	4.08424
4	965720	965720	rs13101828	G	A	0.453437	0.002897	0.001967	0.140874	493758	0.0133718	0.0022187	1.67196e-09	DGKQ	0.0104748	7.9256
4	3434885	3434885	rs6818397	G	T	0.615294	0.009069	0.002003	6.07e-06	505379	0.0128591	0.00219774	4.88486e-09	RGS12	0.0037901	3.09434
4	15101010	15101010	rs2702552	A	G	0.337207	0.009814	0.001943	4.45e-07	563942	0.0135044	0.00222675	1.3229e-09	CPEB2	0.0036904	2.52683
4	56275230	56275230	rs11945371	T	G	0.309271	0.005376	0.001997	0.007109	560776	0.0147163	0.00221772	3.2279e-11	TM165	0.0093403	8.34289
4	77721651	77721651	rs10035073	C	T	0.218777	0.009883	0.002281	1.5e-05	562856	0.014193	0.00259521	4.52766e-08	SHRM3	0.00431	2.52022
4	82132167	82132167	rs788864	A	G	0.289714	-0.010488	0.002032	2.52e-07	563944	-0.0144866	0.00230124	3.07177e-10	KGP2	-0.0039986	2.91401
4	87144762	87144762	rs149844272	A	G	0.01827	0.037116	0.007106	1.8e-07	563946	0.0512413	0.00817843	3.71831e-10	MK10	0.0141253	2.68493
4	87572819	87572819	rs114780014	G	A	0.02162	-0.024183	0.006486	0.000194	562085	-0.0410715	0.00737268	2.53614e-08	PTN13	-0.0168885	3.88363
4	102666785	102666785	rs12511373	T	C	0.107284	0.014953	0.003085	1.27e-06	561920	0.0225423	0.00352544	1.61402e-10	BANK1	0.0075893	3.89589
4	123923955	123923955	rs149921263	A	G	0.037489	-0.00717	0.004882	0.141938	563946	-0.0309186	0.00560159	3.39754e-08	SPAT5	-0.0237486	6.62093
4	124557339	124557339	rs116429926	A	T	0.130806	0.010593	0.002793	0.000151	563942	0.0182769	0.00319533	1.06602e-08	SPY1	0.0076839	4.15121
4	125506718	125506718	rs28856056	C	T	0.41156	0.009087	0.001869	1.18e-06	563943	0.0129113	0.00213619	1.50269e-09	ANR50	0.0038243	2.89501
4	145388954	145388954	rs62343635	A	G	0.301363	-0.005268	0.002006	0.008652	563938	-0.0127843	0.00227932	2.03686e-08	HHIP	-0.0075163	5.62816
4	145722862	145722862	rs11933087	T	A	0.37001	-0.005487	0.00192	0.00428	563850	-0.0143132	0.0021788	5.05516e-11	HHIP	-0.0088262	7.92771
4	157617198	157617198	rs2139980	G	A	0.630133	-0.008784	0.001925	5.11e-06	560787	-0.0155388	0.00212957	2.94938e-13	PDGFC	-0.0067548	7.23869
4	177692636	177692636	rs6552193	G	C	0.110783	0.01277	0.002933	1.35e-05	563946	0.0206601	0.00323396	1.67529e-10	VEGFC	0.0078901	4.90624
4	177882320	177882320	rs76407133	C	T	0.066015	0.018189	0.003706	9.37e-07	563945	0.0237374	0.00424535	2.25256e-08	VEGFC	0.0055484	1.61906
5	35172749	35172749	rs34101526	A	G	0.16151	-0.009819	0.002498	8.57e-05	563943	-0.0159541	0.00286274	2.50388e-08	PRLR	-0.0061351	3.53437
5	55789043	55789043	rs116187362	T	C	0.029734	-0.008934	0.005427	0.099747	563944	-0.0341581	0.00620017	3.6045e-08	ANR55	-0.0252241	6.44205
5	60093612	60093612	rs4235482	A	G	0.483629	-0.007318	0.001836	6.8e-05	563942	-0.0122468	0.00207998	3.9108e-09	ELOV7	-0.0049288	4.24024
5	61456487	61456487	rs2940583	G	T	0.258643	0.009343	0.002098	8.58e-06	563942	0.0129268	0.00233087	2.92466e-08	KIF2A	0.0035838	2.46741
5	111024936	111024936	rs26035	G	A	0.080117	-0.014956	0.003399	1.09e-05	563944	-0.0210927	0.00376575	2.12888e-08	NREP	-0.0061367	2.70928
5	118692218	118692218	rs1509141	G	C	0.29889	-0.004561	0.002012	0.023397	562859	-0.0151767	0.00228437	3.05871e-11	TFIP8	-0.0106157	8.88362
5	133861756	133861756	rs329120	T	C	0.420521	-0.008732	0.001875	3.26e-06	562355	-0.0128725	0.00208629	6.8265e-10	JADE2	-0.0041405	3.67902
5	158015903	158015903	rs1122080	A	G	0.186961	0.009883	0.002373	3.15e-05	563944	0.0160141	0.00262045	9.88759e-10	COE1	0.0061311	4.50322
5	159246948	159246948	rs11954096	G	A	0.052563	0.022323	0.004142	7.25e-08	563943	0.0252488	0.00453925	2.66205e-08	ADA1B	0.0029258	0.435122
5	171925732	171925732	rs4867678	A	T	0.41298	0.006589	0.001895	0.000509	562855	0.0120348	0.00210357	1.05806e-08	SPD2B	0.0054458	4.68221
5	173307137	173307137	rs6885658	T	C	0.289396	0.003513	0.002025	0.08276	563943	-0.0134807	0.00226838	2.80023e-09	CPEB4	-0.0169937	7.47063
5	176736060	176736060	rs115717480	G	A	0.025551	0.02648	0.005835	5.77e-06	563005	0.0455496	0.00665616	7.74292e-12	MAD3	0.0190696	5.87227
6	6746166	6746166	rs1294436	C	G	0.604692	-0.009337	0.001921	1.19e-06	547589	-0.026259	0.00217981	2.02467e-33	LY86	-0.016922	26.7692
6	6782298	6782298	rs4960246	G	A	0.361294	0.001164	0.001926	0.545764	562859	0.0153629	0.00218386	1.99587e-12	LY86	0.0141989	11.4369
6	9530364	9530364	rs1040520	A	G	0.394229	0.01019	0.001889	7.07e-08	563945	0.0118793	0.00215292	3.43386e-08	OFCC1	0.0016893	0.313637
6	15231515	15231515	rs12529596	C	A	0.141904	0.010995	0.002639	3.13e-05	563690	0.0182276	0.00300925	1.38519e-09	JARD2	0.0072326	4.35403
6	25336424	25336424	rs11754685	G	C	0.524661	-0.009482	0.001874	4.25e-07	559846	-0.0117219	0.00211233	2.86833e-08	LR16A	-0.0022399	1.17076
6	27872832	27872832	rs200963	G	A	0.04172	-0.024418	0.004653	1.57e-07	563946	-0.0289961	0.0052125	2.65473e-08	OR2B2	-0.0045781	0.771879
6	29140538	29140538	rs115340779	A	C	0.045518	-0.020572	0.004448	3.81e-06	557903	-0.0278112	0.00506639	4.03385e-08	OR2J2	-0.0072392	1.97521
6	30798476	30798476	rs112100248	T	C	0.018473	-0.032106	0.006882	3.13e-06	557413	-0.042852	0.00779052	3.78648e-08	DDR1	-0.010746	1.91731
6	31200029	31200029	rs148026909	G	A	0.003691	-0.086189	0.021774	7.62e-05	551965	-0.168088	0.026379	1.86516e-10	1C07	-0.081899	5.61124
6	31236680	31236680	rs1130586	A	G	0.286811	-0.011449	0.002274	4.87e-07	560444	-0.0190314	0.00261835	3.63631e-13	1C07	-0.0075824	6.12687
6	32904041	32904041	rs1007636	C	T	0.14431	-0.013425	0.002639	3.7e-07	563302	-0.0208681	0.00295401	1.61418e-12	DMB	-0.0074431	5.36025
6	33232025	33232025	rs460568	T	C	0.169255	-0.010858	0.002443	8.91e-06	563945	-0.0149208	0.0027328	4.76387e-08	VPS52	-0.0040628	2.27192
6	43737983	43737983	rs186369938	C	G	0.022477	-0.018658	0.006426	0.003701	562784	-0.0412691	0.00732231	1.73969e-08	VEGFA	-0.0226111	5.32785
6	55217224	55217224	rs13203638	A	G	0.489768	-0.006223	0.001839	0.00072	563943	-0.0117049	0.00205548	1.23755e-08	GFRAL	-0.0054819	4.76477
6	74230528	74230528	rs2291719	A	G	0.265674	-0.010315	0.002081	7.34e-07	563004	-0.0132806	0.00237062	2.11692e-08	EF1A1	-0.0029656	1.53999
6	80910290	80910290	rs9688523	A	G	0.077965	-0.002129	0.00348	0.54066	563946	-0.0237721	0.00397035	2.13217e-09	ODBB	-0.0216431	8.4041
6	81346033	81346033	rs1902066	C	T	0.562482	-0.003587	0.001872	0.055301	559203	-0.0142019	0.00208385	9.41151e-12	ODBB	-0.0106149	9.76907
6	82024361	82024361	rs72903128	G	C	0.065549	0.014968	0.003843	9.91e-05	563945	0.0245481	0.0043885	2.22227e-08	FA46A	0.0095801	3.64928
6	100629461	100629461	rs6937293	T	C	0.479799	0.001729	0.001845	0.348653	561916	0.0124839	0.00211618	3.65165e-09	MCHR2	0.0107549	7.9799
6	127483308	127483308	rs13202608	C	T	0.110396	0.016307	0.003045	8.74e-08	562362	0.0194098	0.00335667	7.36118e-09	RSPO3	0.0031028	1.07456
6	139273929	139273929	rs59388854	T	C	0.149666	-0.014094	0.002591	5.49e-08	563898	-0.0169551	0.00294054	8.11894e-09	REPS1	-0.0028611	0.830073
6	160767905	160767905	rs520829	G	T	0.46925	0.005706	0.001856	0.002117	563942	0.0176678	0.00212534	9.33902e-17	S22A3	0.0119618	13.3554
7	6065309	6065309	rs117790897	A	G	0.040746	0.025248	0.00478	1.31e-07	563939	0.03297	0.00545857	1.54067e-09	E2AK1	0.007722	1.92956
7	25873110	25873110	rs10282436	T	G	0.192835	0.003914	0.002332	0.093367	559203	-0.0145924	0.00258486	1.64841e-08	NF2L3	-0.0185064	6.75313
7	26437429	26437429	rs1229660	C	T	0.325298	0.004922	0.001966	0.012291	562998	0.013294	0.00224594	3.23652e-09	SNX10	0.008372	6.57951
7	27223771	27223771	rs7801581	T	C	0.251065	-0.011293	0.002183	2.36e-07	562973	-0.0248043	0.00240467	6.02679e-25	HXA11	-0.0135113	17.5928
7	27225629	27225629	rs139791828	A	G	0.010641	0.030924	0.009389	0.000995	563299	0.0616414	0.010717	8.83367e-09	HXA11	0.0307174	5.05168
7	28194397	28194397	rs860262	A	C	0.500674	0.000124	0.001833	0.946029	562850	0.0117414	0.00210621	2.47999e-08	JAZF1	0.0116174	7.58145
7	36084529	36084529	rs2710804	C	T	0.375879	-0.009315	0.001897	9.3e-07	562360	-0.0118306	0.00210543	1.91955e-08	EEPD1	-0.0025156	1.68528
7	80604533	80604533	rs853032	T	C	0.512554	-0.006818	0.001844	0.000219	562857	-0.0117817	0.00205977	1.06573e-08	SEM3C	-0.0049637	4.3128
7	100264320	100264320	rs112082633	C	G	0.011294	0.048337	0.00892	6.13e-08	561936	0.056025	0.0102101	4.08337e-08	GBB2	0.007688	0.176442
7	116198828	116198828	rs1997572	A	G	0.409154	-0.009214	0.001877	9.36e-07	559700	-0.0124186	0.00214288	6.81936e-09	CAV1	-0.0032046	2.13753
7	148885877	148885877	rs12111923	G	A	0.269008	0.009951	0.002079	1.72e-06	563945	0.012777	0.00231448	3.38081e-08	ZN398	0.002826	1.70651
7	151503810	151503810	rs4726100	C	T	0.191968	0.011305	0.002354	1.59e-06	562842	0.015094	0.00262991	9.50445e-09	AAKG2	0.003789	2.22347
7	157011936	157011936	rs117505963	C	T	0.00415	-0.087833	0.016873	1.98e-07	495017	-0.106625	0.0188273	1.48488e-08	UBE3C	-0.018792	1.12497
8	9018120	9018120	rs73197779	T	C	0.20263	-0.007178	0.002342	0.002182	562850	-0.015348	0.00267494	9.59594e-09	PPR3B	-0.00817	5.35677
8	11617142	11617142	rs11785481	T	C	0.148958	-0.007525	0.002598	0.003782	562359	-0.0164867	0.00289237	1.19772e-08	GATA4	-0.0089617	5.49937
8	17682999	17682999	rs2517283	C	G	0.167511	0.009853	0.002476	6.98e-05	560786	0.0156066	0.00278794	2.16938e-08	MTUS1	0.0057536	3.50752
8	25464690	25464690	rs11992444	G	T	0.488559	0.00042	0.00188	0.823281	561917	0.0134124	0.00214539	4.05844e-10	CDCA2	0.0129924	9.30719
8	89339721	89339721	rs7828497	G	T	0.263528	-0.004349	0.002095	0.037923	563936	-0.0143807	0.00238252	1.58049e-09	MMP16	-0.0100317	7.38011
8	126506694	126506694	rs112875651	A	G	0.39095	0.007719	0.001916	5.66e-05	562792	0.0184412	0.00217543	2.30973e-17	TRIB1	0.0107222	12.3893
8	145132389	145132389	rs76234559	G	A	0.082624	0.013022	0.003404	0.000131	562996	0.0220534	0.00387818	1.29641e-08	EXOS4	0.0090314	4.00453
9	2675867	2675867	rs7867894	C	T	0.246026	0.010557	0.002147	8.99e-07	563006	0.0138987	0.00239928	6.91867e-09	VLDLR	0.0033417	2.11374
9	16852707	16852707	rs34296299	T	C	0.041599	0.023772	0.004646	3.16e-07	563000	0.0303163	0.00526119	8.29955e-09	BNC2	0.0065443	1.58063
9	112241370	112241370	rs12376215	A	T	0.287128	0.009831	0.002038	1.43e-06	563939	0.0127602	0.00233483	4.62566e-08	PTN3	0.0029292	1.49016
9	113882423	113882423	rs9775224	T	G	0.439251	0.002086	0.001855	0.260753	563939	0.0116318	0.00212451	4.37383e-08	LPAR1	0.0095458	6.77537
9	124396311	124396311	rs555996	C	G	0.285425	0.009689	0.002102	4.09e-06	559702	0.0146204	0.00233422	3.7639e-10	DAB2P	0.0049314	4.03609
9	130283140	130283140	rs2265690	G	C	0.194177	0.012984	0.002383	5.22e-08	563939	0.0153287	0.00270931	1.53344e-08	NIBL1	0.0023447	0.532004
10	3596526	3596526	rs7086377	G	T	0.605577	0.0055	0.001882	0.00348	562360	0.0128062	0.00209247	9.3506e-10	KLF6	0.0073062	6.57074
10	3839015	3839015	rs117955797	T	C	0.021467	-0.029834	0.006674	7.91e-06	562582	-0.0436895	0.00761559	9.64535e-09	KLF6	-0.0138555	2.91386
10	11082192	11082192	rs1291865	G	T	0.493896	0.006922	0.001853	0.000189	559845	0.0113308	0.0020675	4.24292e-08	CELF2	0.0044088	3.6488
10	34165699	34165699	rs1474921	A	G	0.384752	-0.003066	0.001912	0.108792	563004	-0.0118198	0.00214469	3.56397e-08	PARD3	-0.0087538	6.48466
10	52645248	52645248	rs10994856	A	G	0.179992	-0.01202	0.002409	6.18e-07	562362	-0.0163634	0.00267726	9.83905e-10	A1CF	-0.0043434	2.79804
10	63813802	63813802	rs10761602	T	G	0.564452	0.008732	0.001866	2.91e-06	563940	0.0156248	0.00207868	5.61835e-14	ARI5B	0.0068928	7.71428
10	70335645	70335645	rs139358732	T	C	0.024335	0.032502	0.006519	6.28e-07	562006	0.040708	0.00742872	4.25773e-08	TET1	0.008206	1.16878
10	80897515	80897515	rs779671	A	G	0.472169	-0.005538	0.00198	0.005186	508085	-0.0142237	0.00222974	1.78159e-10	ZMIZ1	-0.0086857	7.46402
10	89644226	89644226	rs35323240	G	C	0.183349	0.012359	0.002393	2.46e-07	562856	0.0152517	0.00274634	2.80083e-08	PTEN	0.0028927	0.943648
10	95893052	95893052	rs10736085	T	A	0.545659	-0.007869	0.001848	2.1e-05	563945	-0.0135902	0.00209012	7.92011e-11	PLCE1	-0.0057212	5.42349
10	97334291	97334291	rs526928	A	C	0.511877	-0.009685	0.001842	1.5e-07	560783	-0.0113393	0.00205805	3.5937e-08	SRBS1	-0.0016543	0.620549
10	114754071	114754071	rs34872471	C	T	0.291697	-0.004856	0.002025	0.016494	563945	-0.0161308	0.00232401	3.89538e-12	TF7L2	-0.0112748	9.62678
10	119542045	119542045	rs7476605	T	G	0.308503	0.009661	0.00202	1.75e-06	562360	0.0127955	0.00226384	1.58496e-08	RFIP2	0.0031345	2.04302
11	8745413	8745413	rs117582149	T	C	0.020884	-0.030814	0.006527	2.39e-06	563004	-0.0446677	0.00743543	1.88515e-09	ST5	-0.0138537	3.10305
11	9071438	9071438	rs7124953	A	T	0.25234	0.011111	0.002135	1.99e-07	562861	0.0173144	0.00238899	4.24316e-13	SCUB2	0.0062034	5.67116
11	9979027	9979027	rs61876981	A	G	0.01119	-0.045846	0.009407	1.12e-06	560327	-0.0624196	0.0107321	6.02123e-09	MTMRD	-0.0165736	2.26953
11	10062082	10062082	rs2896516	C	T	0.31517	-0.011124	0.002104	1.27e-07	546006	-0.0143972	0.00231081	4.65366e-10	MTMRD	-0.0032732	2.43601
11	10507343	10507343	rs61891415	A	G	0.085649	-0.017289	0.003301	1.66e-07	561852	-0.0217702	0.00376338	7.26249e-09	AMPD3	-0.0044812	1.35902
11	10510152	10510152	rs12416948	C	A	0.514832	-0.010041	0.00191	1.5e-07	562997	-0.0130406	0.00214298	1.16285e-09	AMPD3	-0.0029996	2.11057
11	45947464	45947464	rs10838532	C	G	0.245898	-0.00814	0.002164	0.00017	560786	-0.013171	0.00241388	4.85956e-08	LARG2	-0.005031	3.54385
11	49313235	49313235	rs10769572	A	G	0.234186	-0.010866	0.002178	6.21e-07	559701	-0.0152073	0.00242582	3.63569e-10	FOLH1	-0.0043413	3.2325
11	49880095	49880095	rs11040598	T	C	0.266268	-0.010449	0.002101	6.73e-07	562853	-0.013341	0.00238757	2.30096e-08	OR4CD	-0.002892	1.46611
11	61745694	61745694	rs17185574	C	T	0.230867	0.011893	0.002192	5.93e-08	558118	0.0131702	0.00241253	4.78605e-08	FRIH	0.0012772	0.0930775
11	62197427	62197427	rs2077224	A	C	0.38874	-0.00798	0.001909	2.96e-05	563944	-0.0136656	0.00211582	1.05543e-10	AHNK	-0.0056856	5.44786
11	62312786	62312786	rs2509967	G	C	0.380296	-0.001506	0.00192	0.432831	563936	-0.0134313	0.00212523	2.61691e-10	AHNK	-0.0119253	9.21853
11	62926353	62926353	rs12291674	C	T	0.027752	0.023035	0.005666	4.85e-05	563945	0.0414386	0.00629436	4.59639e-11	S22AA	0.0184036	6.02332
11	65238121	65238121	rs11227199	A	G	0.198224	-0.007998	0.002323	0.00058	563944	-0.0142309	0.00255179	2.44935e-08	NTKL	-0.0062329	4.37438
11	65481640	65481640	rs4645917	A	G	0.123216	0.010168	0.002829	0.000328	563943	0.0254722	0.00322543	2.84974e-15	KAT5	0.0153042	11.0611
11	65701204	65701204	rs12361552	A	G	0.484499	-0.008412	0.001851	5.61e-06	563938	-0.0127564	0.00206578	6.6128e-10	NC2A	-0.0043444	3.92858
11	66703817	66703817	rs34469991	G	A	0.068553	0.013994	0.003726	0.000174	563945	0.025089	0.00423354	3.09943e-09	PYC	0.011095	4.74927
11	68951697	68951697	rs12364647	A	G	0.133814	0.010892	0.002747	7.44e-05	563924	0.0177823	0.00312824	1.31228e-08	TPC2	0.0068903	3.75355
11	75140621	75140621	rs73006120	T	C	0.019705	0.033903	0.006748	5.15e-07	563944	0.0422788	0.00770611	4.1022e-08	KLH35	0.0083758	1.09879
11	113358211	113358211	rs4482060	T	A	0.427086	0.008616	0.001857	3.53e-06	563942	0.0113713	0.00207094	3.99852e-08	DRD2	0.0027553	1.94588
11	117068977	117068977	rs474488	A	G	0.170682	-0.010862	0.00247	1.11e-05	561918	-0.0165493	0.00278274	2.72894e-09	SIDT2	-0.0056873	3.60933
11	121606715	121606715	rs4457756	G	A	0.218796	0.009215	0.00223	3.62e-05	561275	0.0155577	0.00247084	3.04408e-10	SORL	0.0063427	5.07525
12	1201866	1201866	rs12812621	C	T	0.253798	0.006965	0.002131	0.001085	562859	0.0133389	0.00244124	4.65605e-08	RB6I2	0.0063739	4.36741
12	13179433	13179433	rs7963598	A	C	0.577188	-0.009452	0.001862	3.95e-07	563941	-0.0130027	0.00213035	1.03741e-09	K1467	-0.0035507	2.58065
12	21343886	21343886	rs67981690	G	A	0.131071	-0.013267	0.00274	1.31e-06	563943	-0.0186776	0.00312237	2.20599e-09	SO1B1	-0.0054106	2.77367
12	26440698	26440698	rs12814794	G	A	0.247366	0.002378	0.002152	0.269042	560786	-0.0181292	0.00240357	4.60576e-14	SSPN	-0.0205072	12.7665
12	48143315	48143315	rs145878042	G	A	0.010545	0.024266	0.008111	0.002784	561892	0.0730442	0.00957747	2.40893e-14	RPGF3	0.0487782	11.0628
12	53448320	53448320	rs11170386	C	T	0.711081	-0.007153	0.002047	0.000479	563920	-0.0126331	0.00231392	4.77209e-08	TENC1	-0.0054801	4.00163
12	54331583	54331583	rs71455259	T	C	0.075532	0.004413	0.003547	0.213421	562999	0.0222968	0.00402661	3.0705e-08	HXC13	0.0178838	6.84203
12	54340622	54340622	rs1443509	T	C	0.144064	-0.004388	0.002634	0.095751	563946	-0.0245463	0.00300506	3.12691e-16	HXC13	-0.0201583	14.486
12	54389179	54389179	rs75493807	A	C	0.042593	0.011998	0.004828	0.012973	563940	0.0302265	0.00549877	3.86425e-08	HXC6	0.0182285	5.52598
12	54421476	54421476	rs10876528	A	C	0.366753	-0.007276	0.001906	0.000136	562361	-0.0230246	0.00211322	1.21078e-27	HXC4	-0.0157486	23.0505
12	85686488	85686488	rs11116771	C	T	0.644072	-0.008834	0.001927	4.61e-06	563942	-0.0119021	0.0021313	2.34465e-08	ALX1	-0.0030681	2.29362
12	94133284	94133284	rs10777538	G	A	0.444104	-0.004816	0.001871	0.010059	563911	-0.0119483	0.00208299	9.68661e-09	CRADD	-0.0071323	6.01638
12	115472490	115472490	rs35312	A	G	0.365682	-0.007156	0.001931	0.000213	559201	-0.0117735	0.0021349	3.49181e-08	TBX3	-0.0046175	3.78533
12	120785685	120785685	rs12423303	G	A	0.056219	0.018866	0.004017	2.69e-06	562355	0.027857	0.00442991	3.20765e-10	MSI1H	0.008991	3.92357
12	123209295	123209295	rs3922628	A	T	0.211347	0.005308	0.002318	0.022045	563937	0.0216111	0.00262649	1.90153e-16	HCAR1	0.0163031	14.0642
12	123770140	123770140	rs74354194	C	T	0.062781	0.009203	0.003905	0.018452	563943	0.0281556	0.00444048	2.28792e-10	SBNO1	0.0189526	7.9066
13	22023707	22023707	rs4770157	A	C	0.329546	0.010182	0.001966	2.27e-07	563936	0.0127337	0.00224594	1.43075e-08	ZDH20	0.0025517	1.20046
13	40923359	40923359	rs9549182	A	G	0.19262	0.012081	0.002347	2.68e-07	559204	0.0144924	0.00262391	3.32876e-08	FOXO1	0.0024114	0.905852
13	48518958	48518958	rs1326140	C	G	0.18051	-0.012927	0.002394	6.82e-08	560785	-0.0148902	0.00266432	2.28714e-08	SUCB1	-0.0019632	0.474492
13	96281696	96281696	rs12583161	A	G	0.460693	-0.00978	0.001852	1.31e-07	559200	-0.0116074	0.00206664	1.94788e-08	DZIP1	-0.0018274	0.827709
13	110938907	110938907	rs621929	A	G	0.12897	0.007368	0.002782	0.00811	563943	0.0184988	0.00318616	6.39915e-09	CO4A1	0.0111308	6.1029
14	86054644	86054644	rs10145750	C	T	0.275993	0.009864	0.002088	2.36e-06	559841	0.0141021	0.00232224	1.25824e-09	FLRT2	0.0042381	3.27315
14	99690527	99690527	rs17098424	A	G	0.178327	-0.010715	0.002418	9.49e-06	560785	-0.0147086	0.00268503	4.30165e-08	BC11B	-0.0039936	2.34363
15	31689543	31689543	rs12441543	A	G	0.287435	0.001564	0.002061	0.447808	563940	0.0128363	0.00229899	2.35787e-08	KLF13	0.0112723	7.27857
15	40640632	40640632	rs4605132	T	C	0.493528	0.009156	0.001983	3.96e-06	561272	0.0124651	0.00220563	1.59062e-08	PHGR1	0.0033091	2.39613
15	48939181	48939181	rs6493334	T	A	0.15074	0.012756	0.002634	1.3e-06	560787	0.0163045	0.00292345	2.44497e-08	FBN1	0.0035485	1.72567
15	54006063	54006063	rs690214	C	T	0.485157	0.009169	0.001846	6.96e-07	560784	0.0116158	0.0020357	1.15643e-08	WDR72	0.0024468	1.77949
15	57768285	57768285	rs56196574	G	A	0.14791	-0.013045	0.002611	5.94e-07	563003	-0.0170084	0.00298583	1.22389e-08	CGNL1	-0.0039634	1.68604
15	80692981	80692981	rs9944177	A	G	0.195925	0.011352	0.002324	1.06e-06	560785	0.0143136	0.00260422	3.8781e-08	ARNT2	0.0029616	1.43669
16	3811556	3811556	rs886528	G	A	0.44456	-0.008611	0.001858	3.62e-06	559203	-0.0122308	0.00204617	2.26692e-09	CBP	-0.0036198	3.20327
16	4157696	4157696	rs370222	A	G	0.299895	0.011045	0.002037	6.02e-08	563000	0.0132137	0.002334	1.50142e-08	ADCY9	0.0021687	0.603094
16	4447970	4447970	rs1291697	C	T	0.043367	-0.021132	0.004767	9.41e-06	510124	-0.0360214	0.0053368	1.48238e-11	CORO7	-0.0148894	5.80263
16	30840877	30840877	rs7500719	A	G	0.274506	-0.010561	0.002062	3.09e-07	563942	-0.0129359	0.00229985	1.85862e-08	BCL7C	-0.0023749	1.22077
16	66909030	66909030	rs462502	A	G	0.083635	-0.015219	0.003383	6.93e-06	559393	-0.0224556	0.00380516	3.60529e-09	ULA1	-0.0072366	3.28379
16	69588961	69588961	rs116639904	C	T	0.080226	-0.012945	0.003404	0.000144	563941	-0.0211419	0.00387818	4.99438e-08	NFAT5	-0.0081969	3.45988
16	70067440	70067440	rs181501802	A	G	0.063285	0.021601	0.004004	7.03e-08	562024	0.0261538	0.00455194	9.15716e-09	CL18A	0.0045528	0.885195
16	80935153	80935153	rs9925818	T	G	0.426197	0.008632	0.001873	4.12e-06	562856	0.0118723	0.00208471	1.23408e-08	COXM2	0.0032403	2.52355
16	81528621	81528621	rs66710707	G	A	0.284352	0.003735	0.002067	0.070809	563003	0.0137993	0.00235904	4.9294e-09	CMIP	0.0100643	7.15729
16	86014241	86014241	rs16940202	C	T	0.163657	-0.013361	0.002536	1.4e-07	562359	-0.0172205	0.00283912	1.31617e-09	IRF8	-0.0038595	2.02682
17	7223172	7223172	rs4796403	G	A	0.464671	-0.010414	0.001939	7.98e-08	510090	-0.0130694	0.002195	2.6139e-09	NEUL4	-0.0026554	1.48471
17	8030165	8030165	rs7209088	G	C	0.276158	0.010586	0.002092	4.26e-07	563940	0.0131699	0.00238	3.13744e-08	HES7	0.0025839	1.13283
17	8117073	8117073	rs76592252	G	A	0.023551	0.033524	0.006157	5.31e-08	562999	0.038417	0.0069831	3.76725e-08	AURKB	0.004893	0.14907
17	17054951	17054951	rs9893676	C	G	0.278816	0.008795	0.002066	2.1e-05	562861	0.0138942	0.00235821	3.819e-09	MPRIP	0.0050992	3.74027
17	18244770	18244770	rs1975822	T	C	0.427262	0.006734	0.00187	0.000319	563926	0.0128003	0.00213702	2.10142e-09	GLYC	0.0060663	5.18128
17	21276114	21276114	rs1317867	A	G	0.487159	-0.007448	0.001954	0.000139	508096	-0.0120943	0.00215491	1.99513e-08	IRK12	-0.0046463	3.84304
17	34841617	34841617	rs4796223	G	T	0.479503	0.009096	0.001851	9.04e-07	562363	0.014363	0.00206578	3.58086e-12	ZNHI3	0.005267	5.40218
17	38169265	38169265	rs111951038	T	A	0.045963	-0.024035	0.004492	8.98e-08	563941	-0.0300334	0.00513178	4.84428e-09	CSF3	-0.0059984	1.26805
17	39925713	39925713	rs41283425	T	C	0.051608	0.017999	0.004216	1.98e-05	563302	0.0269277	0.00481502	2.23916e-08	PLAK	0.0089287	2.94658
17	41202579	41202579	rs12949768	A	G	0.08253	0.017144	0.003378	3.96e-07	563893	0.0218668	0.0038564	1.4258e-08	BRCA1	0.0047228	1.44364
17	54745339	54745339	rs11868596	C	A	0.254705	-0.005435	0.002129	0.010703	559199	-0.0130868	0.00238386	4.02519e-08	NOGG	-0.0076518	5.42472
17	57909673	57909673	rs189595192	A	G	0.018975	-0.040513	0.007437	5.23e-08	563240	-0.0496154	0.00851154	5.56969e-09	VMP1	-0.0091024	0.972671
17	61601945	61601945	rs867640	T	C	0.388027	-0.006843	0.001919	0.000364	562360	-0.0133905	0.00212436	2.91351e-10	KCNH6	-0.0065475	6.09668
17	73935233	73935233	rs73355708	G	T	0.102919	0.015198	0.003049	6.35e-07	563930	0.0214708	0.00346679	5.89234e-10	FBF1	0.0062728	3.03249
18	46260195	46260195	rs34618417	G	A	0.169666	0.012025	0.002524	1.93e-06	561904	0.0159869	0.00288443	2.98197e-08	CTIF	0.0039619	1.81105
19	1065677	1065677	rs4147937	A	G	0.075917	0.017264	0.003712	3.37e-06	486031	0.0230526	0.00416651	3.15112e-08	ABCA7	0.0057886	2.02916
19	4774475	4774475	rs12459155	G	C	0.129389	-0.009545	0.00277	0.000573	563940	-0.0173313	0.00314756	3.66539e-08	FEM1A	-0.0077863	4.19403
19	18404936	18404936	rs4808779	A	G	0.37134	0.002165	0.002017	0.283127	509179	-0.0133738	0.00228874	5.11759e-09	LSM4	-0.0155388	7.74292
19	18635389	18635389	rs12162221	G	A	0.427695	0.008432	0.001955	1.64e-05	510101	0.0157066	0.00220853	1.14536e-12	ELL	0.0072746	7.1559
19	33790556	33790556	rs41355649	A	G	0.066707	0.007613	0.003912	0.051667	510121	0.0290137	0.00441846	5.15252e-11	CEBPA	0.0214007	9.00119
19	33802542	33802542	rs7251505	A	G	0.091848	0.015385	0.003209	1.66e-06	563002	0.0415105	0.00355021	1.39417e-31	CEBPA	0.0261255	25.0758
19	35719106	35719106	rs565791	G	A	0.733566	-0.009687	0.002088	3.54e-06	562362	-0.0127542	0.00232224	3.96932e-08	F187B	-0.0030672	1.95029
19	45619946	45619946	rs11672271	G	A	0.328035	-0.010264	0.002053	5.82e-07	510121	-0.012471	0.00226629	3.73688e-08	MARK4	-0.002207	1.19241
19	49253389	49253389	rs4015	T	C	0.195824	0.008794	0.002375	0.000215	562360	0.0147586	0.00262212	1.81784e-08	FUT1	0.0059646	4.07288
19	51614930	51614930	rs2569436	C	G	0.260029	-0.010701	0.002191	1.06e-06	559701	-0.0140091	0.00246374	1.2997e-08	CTU1	-0.0033081	1.91146
20	6623374	6623374	rs979012	T	C	0.364815	-0.001609	0.001918	0.401423	562361	-0.016021	0.00212362	4.55044e-14	BMP2	-0.014412	12.9455
20	33772243	33772243	rs6060288	A	G	0.279861	0.008057	0.00206	9.25e-05	562857	0.0158451	0.00235319	1.65668e-11	EDEM2	0.0077881	6.7469
20	45526407	45526407	rs1007331	C	T	0.324481	0.000279	0.00197	0.887209	563942	0.0185473	0.00224929	1.63946e-16	EYA2	0.0182683	15.7333
20	45575431	45575431	rs6124902	T	C	0.278385	-0.000611	0.002085	0.769448	562828	-0.0152247	0.00237397	1.42503e-10	EYA2	-0.0146137	9.73236
20	51696092	51696092	rs1892204	T	A	0.493968	0.00147	0.00187	0.431978	563943	0.013462	0.00213702	2.98732e-10	TSH2	0.011992	9.16018
20	55830151	55830151	rs6025468	G	A	0.200954	-0.011938	0.002305	2.29e-07	562359	-0.0189349	0.00256151	1.4455e-13	BMP7	-0.0069969	6.19982
20	62692060	62692060	rs6090040	A	C	0.478393	-0.003471	0.001948	0.074739	510120	-0.0129851	0.0022026	3.73908e-09	TCEA2	-0.0095141	7.30078
22	35664941	35664941	rs2235148	C	T	0.645888	0.002887	0.001926	0.133853	562857	0.0117444	0.00213043	3.53374e-08	HMGX4	0.0088574	6.57839
22	50816619	50816619	rs7511047	G	A	0.340261	0.009859	0.001952	4.52e-07	563946	0.0127888	0.00223425	1.04057e-08	PP6R2	0.0029298	1.63787
Clarified loci after adjustment
CHR	POS	POS	SNP	A1	A2	freq	b	se	p	N	bC	bC_se	bC_pval	NearestGene	dBeta	dP
1	10737226	10737226	rs284312	T	C	0.456211	0.012956	0.001935	2.21e-11	509029	0.0155383	0.00219162	1.34221e-12	CASZ1	0.0025823	1.21657
1	15907908	15907908	rs12691551	G	C	0.385077	0.012819	0.001896	1.42e-11	560781	0.0153663	0.00215879	1.09496e-12	DJC16	0.0025473	1.11289
1	17401740	17401740	rs3818040	T	C	0.347048	-0.015526	0.001957	2.26e-15	544435	-0.0121455	0.00218324	2.65058e-08	PADI2	0.0033805	-7.06923
1	20757820	20757820	rs55761633	C	T	0.114665	-0.021867	0.002876	2.99e-14	563945	-0.018076	0.00329341	4.05302e-08	CK2N1	0.003791	-6.13211
1	31593640	31593640	rs4245633	T	C	0.129043	0.021005	0.002748	2.21e-14	562362	0.0184895	0.00304786	1.30823e-09	PUM1	-0.0025155	-4.77229
1	40039707	40039707	rs12028034	A	G	0.343657	-0.011963	0.00194	7.23e-10	559844	-0.0165106	0.00216865	2.67167e-14	PABP4	-0.0045476	4.43236
1	40255530	40255530	rs4660365	A	C	0.401975	0.010782	0.001914	1.8e-08	563940	0.0141586	0.00217375	7.34384e-11	BMP8B	0.0033766	2.38935
1	40294186	40294186	rs6600301	A	C	0.541117	0.01012	0.001852	4.79e-08	562355	0.0128764	0.00206664	4.64579e-10	MOD5	0.0027564	2.01328
1	43769482	43769482	rs76148363	T	G	0.153691	-0.014012	0.002559	4.47e-08	562998	-0.0185961	0.00291373	1.74541e-10	TIE1	-0.0045841	2.40841
1	44062154	44062154	rs673253	T	C	0.439522	0.012743	0.001862	8.09e-12	563002	0.0168787	0.00207509	4.15427e-16	PTPRF	0.0041357	4.28945
1	46024454	46024454	rs3014219	G	A	0.538569	0.022833	0.001844	3.59e-35	563946	0.0223817	0.00205977	1.67143e-27	AK1A1	-0.0004513	-7.66799
1	46528599	46528599	rs1768816	C	T	0.437033	-0.024305	0.001852	2.75e-39	563942	-0.0240939	0.00206664	2.07617e-31	P55G	0.0002111	-7.87793
1	47657829	47657829	rs78053285	T	A	0.180401	0.014579	0.002521	7.52e-09	563943	0.0168157	0.00288192	5.38287e-09	PDZ1I	0.0022367	0.145204
1	48170522	48170522	rs12138277	A	C	0.574112	0.012074	0.001928	3.95e-10	561852	0.0143831	0.00218555	4.67305e-11	TIKI2	0.0023091	0.926997
1	53286013	53286013	rs1241980	G	A	0.306536	-0.016603	0.002008	1.45e-16	562849	-0.0180844	0.00222711	4.65788e-16	ZY11B	-0.0014814	-0.50682
1	56915481	56915481	rs116449372	T	A	0.039604	-0.029744	0.004698	2.51e-10	563937	-0.0333284	0.0052781	2.71084e-10	LPP3	-0.0035844	-0.0334302
1	61906890	61906890	rs2207789	G	C	0.234039	-0.014387	0.00218	4.25e-11	563941	-0.0142166	0.00242764	4.73811e-09	NFIA	0.0001704	-2.04722
1	66124882	66124882	rs12145237	T	C	0.184267	0.017086	0.002359	4.57e-13	563944	0.0228778	0.00260828	1.76713e-18	LEPR	0.0057918	5.41265
1	68720435	68720435	rs4655581	T	C	0.093369	0.018251	0.00315	7.05e-09	563944	0.0192885	0.00349876	3.52874e-08	WLS	0.0010375	-0.699431
1	79352557	79352557	rs1968955	A	G	0.424446	0.010804	0.001877	8.81e-09	563005	0.0113875	0.00208816	4.94301e-08	ELTD1	0.0005835	-0.749016
1	89178005	89178005	rs305227	G	A	0.38006	0.011927	0.001892	3.01e-10	563942	0.0175123	0.00210111	7.76352e-17	PKN2	0.0055853	6.58851
1	101644898	101644898	rs12090198	A	G	0.116758	0.012777	0.002873	8.84e-06	562357	0.0187029	0.00320781	5.52822e-09	S1PR1	0.0059259	3.20387
1	147290790	147290790	rs12126043	A	G	0.153503	0.025825	0.002538	2.69e-24	563941	0.0246191	0.00284084	4.47009e-18	CXA5	-0.0012059	-6.22056
1	151879676	151879676	rs61817695	T	G	0.285464	-0.011609	0.002036	1.22e-08	563943	-0.0138131	0.00233317	3.21315e-09	THEM4	-0.0022041	0.579429
1	154428283	154428283	rs12133641	G	A	0.406593	0.01039	0.001871	2.88e-08	563924	0.0130442	0.00213786	1.05061e-09	IL6RA	0.0026542	1.43795
1	154853977	154853977	rs7517628	C	G	0.031183	0.040449	0.005415	8.36e-14	563946	0.0374158	0.00613371	1.06056e-09	KCNN3	-0.0030332	-4.10333
1	154960019	154960019	rs7528060	G	T	0.030326	-0.065858	0.005405	4.14e-34	563944	-0.0547927	0.00596564	4.1265e-20	FAD1	0.0110653	-13.9986
1	155206037	155206037	rs75548401	A	G	0.0076	-0.0857	0.011219	2.3e-14	503926	-0.0742563	0.0127074	5.10967e-09	GLCM	0.0114437	-5.34667
1	156154328	156154328	rs150440911	G	T	0.021315	0.031412	0.006547	1.63e-06	563946	0.0416417	0.00748074	2.59867e-08	SEM4A	0.0102297	1.79744
1	158506819	158506819	rs79630372	T	G	0.234654	-0.016871	0.002164	6.71e-15	563942	-0.0160089	0.0024688	8.90412e-11	OR6Y1	0.0008621	-4.12287
1	161572760	161572760	rs61801836	G	C	0.238272	-0.020096	0.002273	9.98e-19	562859	-0.0213345	0.00258862	1.69874e-16	FCG2B	-0.0012385	-2.231
1	161678422	161678422	rs12136414	C	T	0.548427	-0.014982	0.001848	5.52e-16	562859	-0.0163247	0.00209012	5.70174e-15	FCRLA	-0.0013427	-1.01407
1	172161070	172161070	rs569179	G	T	0.422044	-0.018565	0.00186	1.93e-23	562534	-0.0121554	0.00212868	1.12762e-08	DYN3	0.0064096	-14.7666
1	173825692	173825692	rs2295366	G	T	0.24221	-0.015002	0.002147	2.9e-12	560784	-0.0133466	0.00237323	1.86775e-08	SYDM	0.0016554	-3.80892
1	174857981	174857981	rs6658861	G	A	0.607569	0.010786	0.001883	1.05e-08	563938	0.0113353	0.00206802	4.22362e-08	RBG10	0.0005493	-0.604496
1	198990494	198990494	rs17625587	A	G	0.26478	0.022776	0.002089	1.23e-27	563928	0.0257739	0.00237733	2.18824e-27	PTPRC	0.0029979	-0.25019
1	199093350	199093350	rs322896	T	C	0.134152	0.019874	0.002654	7.24e-14	560786	0.0177371	0.00294077	1.62503e-09	PTPRC	-0.0021369	-4.35112
1	203655270	203655270	rs7551560	A	G	0.100072	0.040046	0.003066	6.17e-39	560787	0.0351526	0.00340068	4.79604e-25	AT2B4	-0.0048934	-13.8906
1	211204097	211204097	rs4951492	A	T	0.309753	-0.012611	0.001991	2.46e-10	563944	-0.0139887	0.00223895	4.16035e-10	KCNH1	-0.0013777	-0.228195
1	214156860	214156860	rs235924	T	C	0.344705	0.009759	0.001936	4.72e-07	563003	0.0143084	0.00222093	1.17514e-10	PROX1	0.0045494	3.60385
1	214724413	214724413	rs12745583	G	C	0.261692	0.01339	0.002097	1.77e-10	562857	0.018076	0.0023842	3.41372e-14	PTN14	0.004686	3.71475
1	227804041	227804041	rs10916174	A	G	0.154137	0.010445	0.002647	8.04e-05	563006	0.0186161	0.00298796	4.65329e-10	ZN678	0.0081711	5.2375
1	230295691	230295691	rs4846914	A	G	0.604764	-0.015453	0.001877	1.89e-16	560138	-0.0173169	0.00206277	4.66e-17	GALT2	-0.0018639	0.608076
1	231168477	231168477	rs11122197	A	G	0.367572	-0.012882	0.001916	1.84e-11	563946	-0.0127768	0.0021481	2.71531e-09	FA89A	0.0001052	-2.169
1	231185347	231185347	rs11122204	T	G	0.193925	0.017451	0.002326	6.55e-14	563945	0.0168667	0.00266158	2.34098e-10	FA89A	-0.0005843	-3.55316
1	231493302	231493302	rs2749723	G	A	0.631045	0.027442	0.001897	2.19e-47	563944	0.028648	0.00210543	3.65274e-42	SPRTN	0.001206	-5.22217
1	233048282	233048282	rs73103403	A	G	0.056624	-0.023437	0.003986	4.22e-09	563944	-0.0248483	0.00448133	2.94208e-08	NTPCR	-0.0014113	-0.843342
2	20373869	20373869	rs2137718	A	G	0.445202	-0.010545	0.001863	1.56e-08	559842	-0.01568	0.00213118	1.87519e-13	SDC1	-0.005135	4.92008
2	21286057	21286057	rs515135	T	C	0.182447	0.016607	0.002377	2.91e-12	559205	0.0173675	0.00262393	3.61962e-11	APOB	0.0007605	-1.09477
2	23897725	23897725	rs56262900	A	G	0.100892	0.027381	0.003103	1.17e-18	559844	0.0197996	0.00354049	2.24056e-08	KLH29	-0.0075814	-10.2822
2	25957536	25957536	rs3731639	T	G	0.299573	0.016953	0.001998	2.25e-17	563943	0.0128865	0.00219326	4.2159e-09	ASXL2	-0.0040665	-8.27271
2	26362515	26362515	rs2289021	G	T	0.206317	0.013386	0.002278	4.33e-09	563944	0.0143167	0.00253823	1.69612e-08	RAB10	0.0009307	-0.592969
2	27368588	27368588	rs28489942	C	T	0.347444	0.011004	0.001939	1.42e-08	561919	0.0151055	0.00222342	1.09233e-11	TCF23	0.0041015	3.11393
2	27866139	27866139	rs77350364	G	A	0.216585	0.021039	0.00222	2.79e-21	563939	0.0246618	0.00248873	3.79063e-23	GPN1	0.0036228	1.86689
2	28939626	28939626	rs9309664	G	A	0.372573	0.011968	0.001901	3.17e-10	559202	0.0149356	0.00210889	1.41883e-12	PP1B	0.0029676	2.34913
2	39743876	39743876	rs734663	C	T	0.503915	0.013486	0.001834	2.03e-13	563302	0.0117972	0.00205119	8.85017e-09	M4K3	-0.0016888	-4.63946
2	43330109	43330109	rs4567998	A	C	0.273902	-0.011718	0.002076	1.71e-08	559203	-0.0128206	0.0023119	2.93101e-08	THADA	-0.0011026	-0.234021
2	43422557	43422557	rs4952672	G	A	0.509019	0.017836	0.001896	5.44e-21	560783	0.0167009	0.00210456	2.0952e-15	THADA	-0.0011351	-5.58563
2	46002160	46002160	rs6753292	T	C	0.271908	0.01487	0.00208	9.02e-13	559702	0.0157651	0.00231534	9.83123e-12	KPCE	0.0008951	-1.0374
2	46342779	46342779	rs3768753	A	G	0.250111	-0.015714	0.002137	2.02e-13	562361	-0.0165059	0.00236454	2.94e-12	KPCE	-0.0007919	-1.163
2	46432976	46432976	rs57301277	T	C	0.172749	-0.013642	0.00244	2.32e-08	563940	-0.0160534	0.00278554	8.25716e-09	KPCE	-0.0024114	0.448657
2	46616667	46616667	rs13402254	A	G	0.00846	-0.063942	0.010413	8.48e-10	563035	-0.073316	0.0117482	4.35787e-10	EPAS1	-0.009374	0.289122
2	54007171	54007171	rs2692533	C	A	0.327946	0.016263	0.001968	1.49e-16	560788	0.0154002	0.0021927	2.16537e-12	ASB3	-0.0008628	-4.16235
2	62342905	62342905	rs2060631	T	G	0.35076	-0.011883	0.001933	8.05e-10	563924	-0.0137786	0.00216265	1.87594e-10	COMD1	-0.0018956	0.632577
2	66772000	66772000	rs11897119	C	T	0.395074	-0.012289	0.00188	6.53e-11	560145	-0.0210763	0.0020654	1.89294e-24	MEIS1	-0.0087873	13.5378
2	67145588	67145588	rs7608156	T	G	0.053013	0.0271	0.004127	5.34e-11	563942	0.0258579	0.00462889	2.32094e-08	MEIS1	-0.0012421	-2.63812
2	73897144	73897144	rs6744398	G	A	0.219805	0.015394	0.002211	3.5e-12	563942	0.0154295	0.00250815	7.66407e-10	NAT8	3.55e-05	-2.34039
2	100693760	100693760	rs35742951	G	A	0.180237	-0.015918	0.002392	2.95e-11	559847	-0.0181542	0.00274551	3.78372e-11	AFF3	-0.0022362	-0.108097
2	112275538	112275538	rs112385344	T	C	0.118783	-0.02138	0.002878	1.13e-13	559848	-0.0246555	0.00326659	4.42785e-14	APC1	-0.0032755	0.406886
2	112500035	112500035	rs17040773	C	A	0.233566	0.013091	0.002191	2.38e-09	559838	0.0159863	0.00243713	5.39889e-11	APC1	0.0028953	1.64427
2	113967740	113967740	rs13407583	A	G	0.209601	0.030625	0.002273	2.41e-41	559835	0.0288025	0.00258862	9.3166e-29	PSD4	-0.0018225	-12.5872
2	121976554	121976554	rs6541772	A	G	0.141458	0.028152	0.002662	4.13e-26	559846	0.0278774	0.00297419	7.04324e-21	TF2L1	-0.0002746	-5.23182
2	122022894	122022894	rs2713204	C	G	0.629617	-0.01308	0.001976	3.73e-11	559843	-0.0134579	0.00225431	2.37477e-09	TF2L1	-0.0003779	-1.80391
2	122077166	122077166	rs2580354	A	G	0.207001	0.013976	0.002289	1.06e-09	559845	0.0147015	0.00260193	1.60235e-08	CLAP1	0.0007255	-1.17945
2	135446390	135446390	rs10171677	G	A	0.523551	0.011942	0.001865	1.59e-10	558761	0.0128065	0.00210452	1.16314e-09	TM163	0.0008645	-0.864235
2	144334078	144334078	rs10170378	C	T	0.213741	-0.012344	0.002248	4.09e-08	559847	-0.0141006	0.00251245	1.99682e-08	RHG15	-0.0017566	0.311384
2	145396178	145396178	rs6745169	G	T	0.114402	0.023015	0.003005	1.96e-14	556878	0.0238452	0.00340168	2.38605e-12	ZEB2	0.0008302	-2.08542
2	145597356	145597356	rs10196836	T	C	0.294638	-0.014789	0.002028	3.14e-13	559844	-0.016238	0.00227068	8.60427e-13	ZEB2	-0.001449	-0.437784
2	159553686	159553686	rs2528604	T	C	0.422641	-0.01	0.001865	8.47e-08	559203	-0.0115857	0.00207782	2.46261e-08	PKP4	-0.0015857	0.536488
2	177774441	177774441	rs7599316	T	C	0.580191	0.011232	0.001865	1.77e-09	559846	0.0118868	0.00213285	2.50087e-08	ROA3	0.0006548	-1.15012
2	196700291	196700291	rs12477668	T	C	0.564288	0.010737	0.001857	7.62e-09	559843	0.0127337	0.00212618	2.11097e-09	DYH7	0.0019967	0.557473
2	203774748	203774748	rs72936847	A	G	0.126975	0.018314	0.002764	3.6e-11	559841	0.0209635	0.00317117	3.82599e-11	WDR12	0.0026495	-0.0264413
2	204450734	204450734	rs17478208	A	G	0.082263	-0.017428	0.003377	2.5e-07	559848	-0.022252	0.00377317	3.69211e-09	RAPH1	-0.004824	1.83067
2	208429351	208429351	rs6740584	C	T	0.460698	-0.01314	0.001847	1.18e-12	559847	-0.013278	0.00206234	1.20815e-10	CREB1	-0.000138	-2.01024
2	208541628	208541628	rs6710439	T	G	0.444944	0.012027	0.001948	6.81e-10	558758	0.0124772	0.00223092	2.23379e-08	CCYL1	0.0004502	-1.5159
2	219578361	219578361	rs6436066	G	T	0.446383	-0.021193	0.001858	4.33e-30	559846	-0.0193622	0.0020718	9.13628e-21	TTLL4	0.0018308	-9.32428
2	227088577	227088577	rs2943637	C	A	0.489224	0.01465	0.001841	1.83e-15	559845	0.0116846	0.00203135	8.81252e-09	IRS1	-0.0029654	-6.68265
2	234296650	234296650	rs838718	A	G	0.483922	-0.012713	0.001847	6.12e-12	559202	-0.0120927	0.00206234	4.53034e-09	DGKD	0.0006203	-2.86938
2	239069926	239069926	rs6747952	T	C	0.447388	0.016588	0.00188	1.16e-18	559843	0.0172077	0.00214539	1.05051e-15	F132B	0.0006197	-2.95694
2	242176019	242176019	rs2305073	C	T	0.333842	-0.010452	0.001977	1.27e-07	559843	-0.0132779	0.00225514	3.91315e-09	VIGLN	-0.0028259	1.51128
2	242659067	242659067	rs77890618	A	G	0.130462	-0.016145	0.003056	1.3e-07	504937	-0.0196988	0.00344488	1.07595e-08	ING5	-0.0035538	1.08215
3	12346962	12346962	rs10510412	A	G	0.243151	-0.026664	0.002142	1.6e-35	563944	-0.0332105	0.00236898	1.1944e-44	PPARG	-0.0065465	9.12697
3	14919646	14919646	rs13070927	T	G	0.526119	-0.015952	0.001846	5.98e-18	563945	-0.0150906	0.00206148	2.4753e-13	FGD5	0.0008614	-4.61693
3	16892111	16892111	rs17042809	A	G	0.031795	0.030108	0.005243	9.59e-09	563945	0.0368617	0.00596055	6.23908e-10	PLCL2	0.0067537	1.1867
3	23363050	23363050	rs12185989	T	C	0.327144	0.0133	0.001964	1.31e-11	563929	0.0172613	0.00218926	3.15692e-15	UB2E2	0.0039613	3.61801
3	25067685	25067685	rs62228506	C	A	0.207295	0.013333	0.00227	4.41e-09	563005	0.0152257	0.00258597	3.91358e-09	RARB	0.0018927	0.0518644
3	37992540	37992540	rs6791072	C	T	0.134365	0.029946	0.002694	1.13e-28	563944	0.0318406	0.0029507	3.80157e-27	CTDSL	0.0018946	-1.52688
3	41984800	41984800	rs1624519	G	A	0.163754	0.01942	0.002487	6.12e-15	563945	0.0223515	0.00274489	3.85819e-16	ULK4	0.0029315	1.20037
3	47518266	47518266	rs11716763	T	C	0.396706	0.010419	0.001987	1.6e-07	562998	0.0184159	0.00215968	1.5e-17	SCAP	0.0079969	10.028
3	49585243	49585243	rs56049603	G	C	0.221218	0.008516	0.002302	0.000218	563943	0.0206138	0.002613	3.04792e-15	BSN	0.0120978	10.8545
3	49597230	49597230	rs35999162	G	C	0.309928	-0.011747	0.001988	3.54e-09	563942	-0.015372	0.0022642	1.12791e-11	BSN	-0.003625	2.49673
3	52143516	52143516	rs74603747	C	A	0.081527	-0.02206	0.003393	8.23e-11	561852	-0.0235111	0.00384079	9.27473e-10	POC1A	-0.0014511	-1.0519
3	58230809	58230809	rs71311849	A	G	0.084494	0.02005	0.00331	1.42e-09	563941	0.0255268	0.00377092	1.29331e-11	ABHD6	0.0054768	2.04059
3	66432307	66432307	rs6787828	A	G	0.07202	0.022172	0.003566	5.18e-10	562361	0.0325461	0.00398836	3.34242e-16	LRIG1	0.0103741	6.19027
3	66432680	66432680	rs332371	A	G	0.391712	-0.013347	0.001881	1.32e-12	563941	-0.0183464	0.00209161	1.76412e-18	LRIG1	-0.0049994	5.87405
3	66899354	66899354	rs147249258	C	T	0.114936	0.020479	0.002886	1.34e-12	561852	0.018652	0.00327333	1.21112e-08	KBTB8	-0.001827	-3.95608
3	69902514	69902514	rs13071701	C	T	0.427726	0.021714	0.001863	2.36e-31	562362	0.0187144	0.00205053	7.06677e-20	MITF	-0.0029996	-11.4763
3	71267720	71267720	rs2037473	C	G	0.410982	0.0118	0.001877	3.34e-10	562859	0.0122117	0.00214288	1.20694e-08	FOXP1	0.0004117	-1.55794
3	121641352	121641352	rs11920521	G	A	0.472324	-0.016963	0.001842	3.45e-20	562361	-0.0162388	0.00205805	3.01261e-15	S15A2	0.0007242	-4.94112
3	132197995	132197995	rs62292950	G	T	0.133232	-0.021971	0.002708	5.12e-16	563946	-0.0199025	0.00306728	8.66001e-11	DJC13	0.0020685	-5.22825
3	141105570	141105570	rs724016	G	A	0.442655	0.013985	0.001855	4.99e-14	559846	0.01826	0.00204355	4.05586e-19	ZBT38	0.004275	5.09002
3	143853149	143853149	rs13078077	A	G	0.682959	-0.011234	0.001986	1.57e-08	559202	-0.0125795	0.00220822	1.22179e-08	DIA1	-0.0013455	0.108903
3	151964756	151964756	rs385685	G	A	0.354204	0.011338	0.001938	5.03e-09	562859	0.0132332	0.00216693	1.01589e-09	MBNL1	0.0018952	0.694721
3	154618519	154618519	rs12633569	C	T	0.492496	-0.011412	0.001881	1.33e-09	563943	-0.0144096	0.00209147	5.59151e-12	NEP	-0.0029976	2.37632
3	168949093	168949093	rs12494105	C	G	0.403132	0.010102	0.001902	1.12e-07	563945	0.0173724	0.00210975	1.80566e-16	EVI1	0.0072704	8.79258
3	169111915	169111915	rs6779380	C	T	0.457941	-0.017354	0.001866	1.5e-20	563944	-0.0149411	0.00205315	3.40986e-13	EVI1	0.0024129	-7.35665
3	177082829	177082829	rs9873211	C	T	0.397444	0.01235	0.001888	6.28e-11	561275	0.0164504	0.00209765	4.42464e-15	TBL1R	0.0041004	4.15208
3	184036894	184036894	rs55748802	T	C	0.479225	-0.010318	0.001868	3.41e-08	562992	-0.014421	0.00213535	1.44366e-11	EI2BE	-0.004103	3.37329
3	193811458	193811458	rs60179514	T	G	0.69322	0.013276	0.002016	4.67e-11	563003	0.0130692	0.0022879	1.11436e-08	HES1	-0.0002068	-2.37771
3	194415887	194415887	rs1545721	A	G	0.148385	-0.013859	0.00262	1.25e-07	562363	-0.0168231	0.00293824	1.03088e-08	FA43A	-0.0029641	1.0837
3	194506427	194506427	rs9823829	A	G	0.576788	0.018444	0.001903	3.52e-22	561917	0.0202025	0.00216467	1.03082e-20	FA43A	0.0017585	-1.46664
3	194702754	194702754	rs849891	T	C	0.350959	0.017666	0.001943	1.05e-19	558763	0.0162531	0.00217122	7.11695e-14	XXLT1	-0.0014129	-5.8311
4	9922167	9922167	rs16890979	T	C	0.223034	-0.011887	0.002169	4.33e-08	562358	-0.0133337	0.00241818	3.50898e-08	GTR9	-0.0014467	0.091307
4	23332100	23332100	rs7675704	C	G	0.441144	0.011397	0.001867	1.06e-09	562858	0.0133269	0.00213452	4.27782e-10	PRGC1	0.0019299	0.394083
4	23743450	23743450	rs16874072	C	T	0.047712	0.04191	0.004332	4.12e-22	562361	0.035947	0.00480516	7.3805e-14	PRGC1	-0.005963	-8.25319
4	48486598	48486598	rs11945562	C	T	0.51516	0.013637	0.001845	1.52e-13	560784	0.0153241	0.00206063	1.03311e-13	NTCP4	0.0016871	0.167697
4	48988450	48988450	rs3747690	A	C	0.46703	0.011027	0.00185	2.6e-09	562359	0.0130237	0.00206492	2.84247e-10	PG2IP	0.0019967	0.961277
4	55291724	55291724	rs1553660	T	G	0.073167	-0.035968	0.003539	3.14e-24	562361	-0.0370041	0.00393848	5.69367e-21	PGFRA	-0.0010361	-3.25846
4	69491284	69491284	rs4860987	T	A	0.258854	-0.012648	0.002282	3.06e-08	558839	-0.0150615	0.00259618	6.5755e-09	UDB15	-0.0024135	0.667793
4	69599633	69599633	rs11725455	C	T	0.05686	-0.024113	0.003993	1.6e-09	557904	-0.0260418	0.00448729	6.49582e-09	UDB15	-0.0019288	-0.608514
4	77342948	77342948	rs62303278	A	G	0.254157	-0.013152	0.002124	6.12e-10	563938	-0.0147378	0.00243542	1.43559e-09	CD158	-0.0015858	-0.370279
4	77412140	77412140	rs13146355	A	G	0.452668	0.024392	0.001845	7.22e-40	563297	0.0260448	0.00206063	1.28212e-36	SHRM3	0.0016528	-3.24939
4	79673253	79673253	rs57707267	T	C	0.047721	0.031282	0.004358	7.39e-13	563945	0.0325195	0.00485334	2.0779e-11	BMP2K	0.0012375	-1.44898
4	83986664	83986664	rs7689556	G	C	0.191898	-0.017603	0.002417	3.43e-13	562860	-0.0167077	0.00273795	1.04568e-09	CSN4	0.0008953	-3.4841
4	86762295	86762295	rs1510584	G	C	0.381781	0.010959	0.0019	8.25e-09	563943	0.0129585	0.00210802	7.88414e-10	RHG24	0.0019995	1.0197
4	87407518	87407518	rs11947775	C	T	0.369839	-0.015416	0.001903	5.69e-16	562360	-0.0165862	0.00211049	3.8736e-15	MK10	-0.0011702	-0.833003
4	87780869	87780869	rs13147942	C	T	0.084422	0.030122	0.003305	8.33e-20	563946	0.0378405	0.00379554	2.06804e-23	SOAT	0.0077185	3.60509
4	87908085	87908085	rs2053770	T	C	0.547213	0.018497	0.001845	1.23e-23	563943	0.0231134	0.00206063	3.37762e-29	AFF1	0.0046164	5.56129
4	87982876	87982876	rs7660883	G	C	0.376069	0.030758	0.001911	3.07e-58	560784	0.0335127	0.00209248	9.91765e-58	AFF1	0.0027547	-0.50927
4	88416223	88416223	rs8342	A	G	0.404553	0.012675	0.00187	1.25e-11	563003	0.0135007	0.00208212	8.92683e-11	SPRL1	0.0008257	-0.853787
4	100051819	100051819	rs4699710	C	T	0.304919	0.009459	0.001999	2.26e-06	562362	0.0140773	0.00221945	2.25769e-10	ADH4	0.0046183	4.00044
4	115554439	115554439	rs7677294	G	A	0.18158	-0.020918	0.002396	2.69e-18	562361	-0.0207461	0.00266604	7.16057e-15	CGT	0.0001719	-3.4252
4	145770167	145770167	rs12651029	A	G	0.297132	-0.005281	0.002015	0.008783	562342	-0.015382	0.00225957	9.92995e-12	HHIP	-0.010101	8.9467
5	450777	450777	rs11745789	C	T	0.400751	0.017654	0.001875	5.06e-21	563943	0.019411	0.00208643	1.35973e-20	EXOC3	0.001757	-0.429302
5	34496015	34496015	rs7705210	A	C	0.659781	0.014587	0.001962	1.09e-13	561909	0.0119334	0.00218754	4.89286e-08	RAI14	-0.0026536	-5.65214
5	38877333	38877333	rs357270	G	A	0.166102	-0.018176	0.002469	1.87e-13	562361	-0.0190373	0.00275511	4.85286e-12	OSMR	-0.0008613	-1.41416
5	38986329	38986329	rs1239257	T	G	0.368829	0.014284	0.001922	1.11e-13	562533	0.0153163	0.00218049	2.15195e-12	RICTR	0.0010323	-1.28751
5	40611975	40611975	rs4957324	A	G	0.118519	0.021515	0.002863	6e-14	563945	0.0187225	0.00317313	3.62787e-09	PE2R4	-0.0027925	-4.7815
5	52193442	52193442	rs77853563	G	A	0.039231	-0.026468	0.004739	2.39e-08	563946	-0.0303945	0.00542432	2.10216e-08	ITA1	-0.0039265	0.0557321
5	53306690	53306690	rs12186509	G	T	0.26094	0.007977	0.002099	0.000145	563926	0.0157964	0.00238574	3.56284e-11	ARL15	0.0078194	6.60957
5	57487472	57487472	rs10940601	T	C	0.372714	0.010726	0.001905	1.85e-08	560784	0.0133444	0.00211235	2.66098e-10	PLK2	0.0026184	1.84213
5	71712239	71712239	rs16878418	T	A	0.306329	-0.011998	0.001998	1.96e-09	563005	-0.0126883	0.00221858	1.07093e-08	ZN366	-0.0006903	-0.737505
5	72057262	72057262	rs2673911	G	A	0.157514	0.016855	0.002557	4.49e-11	558115	0.0210599	0.00291205	4.76047e-13	TNPO1	0.0042049	1.9746
5	72401140	72401140	rs56026882	A	G	0.17067	-0.015458	0.002447	2.75e-10	563942	-0.0154562	0.00279139	3.07566e-08	FCHO2	1.8e-06	-2.04861
5	88111209	88111209	rs244760	C	G	0.236021	0.015992	0.002179	2.22e-13	559701	0.0184784	0.00242678	2.65033e-14	MEF2C	0.0024864	0.923053
5	90416392	90416392	rs1808084	C	T	0.316184	0.008189	0.001988	3.84e-05	563942	0.0123592	0.0021846	1.53685e-08	GPR98	0.0041702	3.3977
5	111206807	111206807	rs4957986	A	G	0.609742	0.012696	0.001894	2.12e-11	560768	0.01366	0.00210284	8.24757e-11	NREP	0.000964	-0.58999
5	111399920	111399920	rs1389311	T	C	0.066578	-0.028641	0.003719	1.41e-14	563945	-0.0261983	0.00417279	3.42149e-10	NREP	0.0024427	-4.385
5	127238941	127238941	rs13155003	C	T	0.183596	-0.019043	0.002387	1.58e-15	560444	-0.0216954	0.00271255	1.26325e-15	S12A2	-0.0026524	0.0971678
5	154025095	154025095	rs3863200	C	A	0.191995	0.021436	0.00237	1.57e-19	563902	0.0209195	0.00269839	9.00484e-15	LARP1	-0.0005165	-4.75858
5	158472899	158472899	rs3922246	A	G	0.148171	0.011247	0.002593	1.46e-05	563945	0.016695	0.00288807	7.4393e-09	COE1	0.005448	3.29282
5	176511432	176511432	rs451643	T	G	0.297462	0.017154	0.002077	1.56e-16	562319	0.0251179	0.00231276	1.77568e-27	FGFR4	0.0079639	10.9438
5	176799992	176799992	rs10051765	C	T	0.335476	0.023852	0.001989	4.38e-33	563939	0.0227838	0.0022652	8.45472e-24	RGS14	-0.0010682	-9.28563
6	1760787	1760787	rs3800038	A	G	0.399045	0.01503	0.001897	2.44e-15	563942	0.0159266	0.0021053	3.87807e-14	GMDS	0.0008966	-1.20123
6	2096081	2096081	rs9378321	T	C	0.458699	0.023645	0.001854	3.24e-37	563944	0.0239529	0.00206836	5.16557e-31	GMDS	0.0003079	-6.20257
6	7047957	7047957	rs12215917	G	A	0.12341	0.014606	0.002801	1.89e-07	562360	0.019464	0.00314664	6.18455e-10	RREB1	0.004858	2.48515
6	7211818	7211818	rs1334576	A	G	0.421641	0.020182	0.00186	2.17e-27	561273	0.0302437	0.00207352	3.4623e-48	RREB1	0.0100617	20.7971
6	7255650	7255650	rs9505097	T	C	0.196874	0.031087	0.002319	6.15e-41	563944	0.035289	0.00259994	5.79065e-42	RREB1	0.004202	1.02615
6	7278046	7278046	rs9502577	G	C	0.22505	-0.014935	0.0022	1.17e-11	563004	-0.0201722	0.00249888	6.8881e-16	SSRA	-0.0052372	4.23009
6	7792584	7792584	rs6917985	T	C	0.065789	0.020158	0.003709	5.59e-08	563944	0.0236744	0.00413757	1.05398e-08	BMP6	0.0035164	0.724579
6	12276858	12276858	rs4714351	C	T	0.109816	0.022628	0.003017	6.71e-14	563945	0.0246276	0.00333228	1.46157e-13	EDN1	0.0019996	-0.338097
6	13508443	13508443	rs9382170	A	T	0.311073	0.013708	0.001997	6.89e-12	562852	0.0149475	0.00227191	4.7289e-11	GFOD1	0.0012395	-0.836541
6	16288192	16288192	rs6459467	G	A	0.61373	0.020868	0.001897	4.04e-28	562357	0.0231793	0.00208029	7.80632e-29	GMPR1	0.0023113	0.713935
6	20785165	20785165	rs9348443	G	A	0.421697	-0.009002	0.001862	1.36e-06	563944	-0.013309	0.00207524	1.42465e-10	CDKAL	-0.004307	3.97983
6	24811053	24811053	rs56926383	A	G	0.149359	0.015073	0.002582	5.43e-09	563879	0.0181693	0.00296167	8.52464e-10	FA65B	0.0030963	0.804124
6	24945077	24945077	rs628794	C	T	0.178175	0.021916	0.002407	9.17e-20	560782	0.0213272	0.00267545	1.5687e-15	FA65B	-0.0005888	-4.23317
6	25247120	25247120	rs6940230	T	G	0.061837	-0.053942	0.003823	3.74e-45	563006	-0.0443933	0.00423569	1.0588e-25	LR16A	0.0095487	-19.4519
6	25299249	25299249	rs137942679	A	G	0.021598	0.068896	0.00657	1.07e-25	563918	0.0610038	0.00752876	5.37213e-16	LR16A	-0.0078922	-9.70076
6	25314597	25314597	rs181058325	G	A	0.071251	0.086154	0.00361	7.75e-126	563761	0.0830472	0.00413643	1.17244e-89	LR16A	-0.0031068	-36.1798
6	25322759	25322759	rs7764111	C	A	0.226595	0.032681	0.002192	3.24e-50	563944	0.033198	0.00243799	3.17564e-42	LR16A	0.000517	-7.99129
6	25385648	25385648	rs215010	G	A	0.442612	-0.031454	0.001856	2.42e-64	562859	-0.0275586	0.00204442	2.05309e-41	LR16A	0.0038954	-22.9286
6	25490089	25490089	rs301394	C	T	0.348176	-0.014619	0.001933	4.11e-14	563939	-0.0155842	0.00221843	2.14255e-12	LR16A	-0.0009652	-1.71709
6	25549546	25549546	rs76463668	T	C	0.028195	-0.061669	0.005784	1.64e-26	562089	-0.064359	0.00655683	9.65052e-23	LR16A	-0.00269	-3.76971
6	25582757	25582757	rs10434845	G	C	0.404825	0.051927	0.001872	2.58e-169	562860	0.0483073	0.00205828	8.30937e-122	LR16A	-0.0036197	-47.5079
6	25684279	25684279	rs4712955	A	G	0.462141	-0.035242	0.001852	1.06e-80	561275	-0.0355171	0.0020408	7.76373e-68	SEGN	-0.0002751	-12.8648
6	25726169	25726169	rs376449185	T	C	0.00538	0.105729	0.01341	3.31e-15	558195	0.121925	0.0153983	2.41254e-15	H2A1A	0.016196	0.137353
6	25866075	25866075	rs78273613	G	A	0.099207	0.141758	0.003086	0	563946	0.135859	0.00347063	0	NPT4	-0.005899	0
6	25939289	25939289	rs75365655	T	C	0.082086	-0.039103	0.003439	6.38e-30	563945	-0.0427516	0.00387997	3.11072e-28	NPT3	-0.0036486	-1.68804
6	26104632	26104632	rs198851	T	G	0.150181	0.106885	0.002567	0	563945	0.106679	0.00283976	0	H4	-0.000206	0
6	26110148	26110148	rs13206501	C	T	0.124231	-0.063306	0.002783	1.8e-114	563944	-0.0540651	0.0030782	4.65941e-69	H1T	0.0092409	-45.4131
6	26113542	26113542	rs62396167	G	A	0.119846	-0.049636	0.002825	4.53e-69	563945	-0.0533917	0.00316694	8.99894e-64	H2B1C	-0.0037557	-5.29809
6	26199064	26199064	rs76827793	G	A	0.011594	-0.10496	0.011982	2.07e-18	481839	-0.0805592	0.0135744	2.94508e-09	H31	0.0244008	-9.15313
6	26233819	26233819	rs111534271	G	C	0.127233	0.019	0.002761	6.15e-12	562852	0.0209998	0.00313999	2.26493e-11	H13	0.0019998	-0.56618
6	26350810	26350810	rs34565965	A	T	0.244268	-0.040224	0.00213	1.65e-79	562857	-0.0361224	0.00244041	1.42699e-49	BT3A2	0.0041016	-29.9369
6	26379346	26379346	rs113435302	G	A	0.037504	0.039296	0.004847	5.45e-16	563944	0.0355033	0.00554326	1.50608e-10	BT3A2	-0.0037927	-5.44145
6	26462067	26462067	rs146093705	G	A	0.032069	-0.04932	0.00559	1.19e-18	563930	-0.0480028	0.006394	6.028e-14	BT2A1	0.0013172	-4.70463
6	26500563	26500563	rs13194984	T	G	0.138168	0.074273	0.002663	3.76e-171	562355	0.0723083	0.00294857	8.35618e-133	BT1A1	-0.0019647	-38.3468
6	26640615	26640615	rs11752310	C	T	0.021794	0.050979	0.006316	7.3e-16	563944	0.0537346	0.00714537	5.46961e-14	ZN322	0.0027556	-1.87463
6	26980123	26980123	rs147326650	T	C	0.022575	0.041324	0.006268	4.47e-11	563944	0.0468421	0.0072196	8.6878e-11	H2B1J	0.0055181	-0.288602
6	27037080	27037080	rs13194491	T	C	0.086066	0.107286	0.003277	4.84e-235	562362	0.103804	0.00363441	2.02075e-179	H2B1J	-0.003482	-55.6207
6	27104783	27104783	rs1321578	G	T	0.043672	-0.032745	0.004538	5.6e-13	562363	-0.0369438	0.00506142	2.89721e-13	H2B1K	-0.0041988	0.286208
6	27334677	27334677	rs57349601	G	T	0.007425	-0.069365	0.010915	2.15e-10	557470	-0.0751276	0.0123115	1.04588e-09	ZN391	-0.0057626	-0.687043
6	27763714	27763714	rs76148407	G	C	0.03299	0.086092	0.005245	1.73e-60	563941	0.0791251	0.00596224	3.40769e-40	H2B1L	-0.0069669	-20.2944
6	27859568	27859568	rs200968	C	T	0.18517	-0.048887	0.002365	7.09e-95	562363	-0.0448199	0.00261349	6.34853e-66	H31	0.0040671	-28.952
6	28299088	28299088	rs35814746	C	T	0.085371	0.08646	0.003297	1.58e-151	562860	0.0858734	0.00376003	1.90117e-115	ZSC31	-0.0005866	-36.0804
6	28630793	28630793	rs7767008	G	T	0.286194	-0.036968	0.002039	2.12e-73	561273	-0.0332766	0.00225411	2.55144e-49	SCND3	0.0036914	-24.0804
6	29032262	29032262	rs3129803	G	A	0.09204	0.072313	0.003231	7.18e-111	556819	0.0728987	0.00367626	1.65395e-87	OR2W1	0.0005857	-23.3624
6	29325160	29325160	rs3129684	G	C	0.037268	0.073342	0.004868	2.94e-51	558844	0.070406	0.00542371	1.56521e-38	OR5V1	-0.002936	-12.7262
6	29477821	29477821	rs1233478	T	G	0.193155	-0.04098	0.00234	1.21e-68	556170	-0.0353955	0.00259179	1.83922e-42	MAS1L	0.0055845	-26.1818
6	29634012	29634012	rs3130253	A	G	0.092457	0.055894	0.003221	2.14e-67	557258	0.058616	0.00356029	6.67461e-61	MOG	0.002722	-6.49401
6	29821982	29821982	rs2517861	T	C	0.258302	-0.036337	0.002111	2.37e-66	559203	-0.0280613	0.00234211	4.45772e-33	HLAG	0.0082757	-33.2744
6	29827385	29827385	rs1611697	C	A	0.037465	0.054442	0.004849	3.25e-29	558844	0.0513692	0.00543393	3.27927e-21	HLAG	-0.0030728	-8.00389
6	30205643	30205643	rs3094640	C	T	0.352986	0.016571	0.001938	1.31e-17	557754	0.0193619	0.00222259	3.00088e-18	TRI26	0.0027909	0.640023
6	30225908	30225908	rs75948696	T	C	0.04949	-0.036012	0.004527	1.88e-15	558837	-0.0478974	0.00519007	2.74065e-20	TRI26	-0.0118854	4.8363
6	30358957	30358957	rs3094703	T	C	0.13737	-0.04712	0.002677	2.74e-69	555685	-0.0336427	0.00298661	1.96491e-29	RPP21	0.0134773	-39.8556
6	30724952	30724952	rs9262168	A	G	0.037172	-0.035569	0.004881	3.31e-13	558809	-0.046869	0.00548802	1.33951e-17	IEX1	-0.0113	4.39288
6	30874308	30874308	rs3130780	T	G	0.227236	0.028724	0.0022	6.26e-39	556165	0.0332021	0.00244489	5.25044e-42	TF2H4	0.0044781	3.07638
6	30886729	30886729	rs41273021	T	C	0.116774	-0.021946	0.002901	4.05e-14	558844	-0.0317685	0.00331427	9.21331e-22	SYVM	-0.0098225	7.64304
6	30900919	30900919	rs7764239	A	C	0.050157	0.022896	0.004222	6.01e-08	557259	0.0256844	0.00468422	4.17743e-08	SFTA2	0.0027884	0.157965
6	31105633	31105633	rs2074478	C	T	0.189195	0.02226	0.002344	2.35e-21	561274	0.027496	0.00259526	3.15321e-26	PS1C1	0.005236	4.87231
6	31106893	31106893	rs1265094	G	A	0.521116	-0.034154	0.00184	7.85e-77	561270	-0.0345995	0.00205634	1.57877e-63	PS1C1	-0.0004455	-13.3034
6	31302718	31302718	rs9265745	G	A	0.401389	-0.028025	0.001883	4.57e-50	562852	-0.0253371	0.0021479	4.08128e-32	1B07	0.0026879	-17.9509
6	31475056	31475056	rs41273040	A	G	0.024918	0.037597	0.005929	2.35e-10	563944	0.0378756	0.00682128	2.81516e-08	MICB	0.0002786	-2.07844
6	31542963	31542963	rs1800750	A	G	0.014954	-0.060596	0.007576	1.32e-15	560269	-0.0554559	0.00859983	1.12974e-10	TNFA	0.0051401	-4.9324
6	31591918	31591918	rs2260051	A	T	0.436304	0.03042	0.001849	9.42e-61	562858	0.0326877	0.00211951	1.15943e-53	PRC2A	0.0022677	-7.09019
6	31682029	31682029	rs805284	A	G	0.056779	-0.043838	0.00397	2.59e-28	560141	-0.0629614	0.00444104	1.26854e-45	LY66F	-0.0191234	17.31
6	31772829	31772829	rs12206352	T	C	0.037149	-0.036299	0.004856	8.07e-14	563933	-0.0535921	0.00555078	4.68678e-22	LSM2	-0.0172931	8.236
6	31914935	31914935	rs1048709	A	G	0.19463	0.026222	0.00232	1.4e-29	561274	0.0331469	0.00254917	1.17586e-38	CFAB	0.0069249	9.07577
6	31918860	31918860	rs1270942	G	A	0.125678	-0.047439	0.002766	6.64e-66	562361	-0.0308243	0.00306345	8.13577e-24	CFAB	0.0166147	-42.0882
6	31946792	31946792	rs2746394	A	G	0.015144	0.048319	0.007552	1.62e-10	557470	0.0563095	0.0086077	6.08014e-11	STK19	0.0079905	0.425601
6	32190217	32190217	rs915895	C	T	0.35634	-0.032094	0.001923	1.73e-62	561276	-0.0305393	0.00212795	1.04255e-46	NOTC4	0.0015547	-15.7801
6	32218989	32218989	rs9296015	A	G	0.190214	0.021445	0.002346	6.48e-20	556174	0.0141006	0.00257202	4.19767e-08	NOTC4	-0.0073444	-11.8114
6	32385399	32385399	rs3135377	A	G	0.229865	0.036418	0.002192	5.93e-62	555686	0.0408594	0.00243799	4.82828e-63	BTNL2	0.0044414	1.08926
6	32461871	32461871	rs112923147	G	A	0.219653	-0.035813	0.003293	1.62e-27	407739	-0.0386695	0.00362304	1.35863e-26	DRB5	-0.0028565	-0.923586
6	32471012	32471012	rs111637026	A	G	0.375634	-0.017407	0.002677	8.12e-11	407739	-0.0245746	0.00296072	1.03928e-16	DRB5	-0.0071676	5.89282
6	32586732	32586732	rs9271363	G	C	0.172361	0.019321	0.002447	3.03e-15	556750	0.0287972	0.00279139	5.93919e-25	DQA1	0.0094762	9.70772
6	32614432	32614432	rs193292687	A	G	0.11527	-0.025325	0.003717	9.94e-12	407739	-0.0388993	0.00411821	3.53105e-21	DQA1	-0.0135743	9.44948
6	32630096	32630096	rs9274063	A	G	0.217423	-0.014571	0.002914	5.86e-07	450903	-0.022084	0.00321739	6.69795e-12	DQA1	-0.007513	4.94196
6	32636376	32636376	rs2856698	G	C	0.32356	-0.039757	0.001973	3.35e-90	560583	-0.0370312	0.0022518	9.07948e-61	DQA1	0.0027258	-29.433
6	32685332	32685332	rs116189954	T	C	0.013302	0.05345	0.008157	5.85e-11	555406	0.0614068	0.00928585	3.76742e-11	DQA2	0.0079568	0.191112
6	32698369	32698369	rs9276157	T	C	0.256658	0.020925	0.002137	1.28e-22	561451	0.0226114	0.00244625	2.39006e-20	DQA2	0.0016864	-2.2712
6	32792886	32792886	rs41316544	A	T	0.058118	-0.034887	0.003915	5.37e-19	563917	-0.0510826	0.00447768	3.80253e-30	TAP2	-0.0161956	11.1499
6	32899296	32899296	rs154978	C	T	0.482016	0.023021	0.001841	7.65e-36	561272	0.0235355	0.00203135	4.84472e-31	DMB	0.0005145	-4.80161
6	32904039	32904039	rs77318243	A	T	0.090522	-0.043754	0.003198	1.43e-42	563944	-0.0255555	0.00364859	2.48349e-12	DMB	0.0181985	-30.2397
6	32906228	32906228	rs6934645	A	C	0.018487	-0.042818	0.006845	4.1e-10	562363	-0.0513259	0.00784468	6.03944e-11	DMB	-0.0085079	0.831787
6	32962644	32962644	rs9276962	T	C	0.007874	-0.070479	0.010476	1.78e-11	551965	-0.0676155	0.0119412	1.49302e-08	DOA	0.0028635	-2.92365
6	33048564	33048564	rs12722022	A	G	0.032932	0.03503	0.005141	9.82e-12	563946	0.0326457	0.00584657	2.35421e-08	DPB1	-0.0023843	-3.37973
6	36579252	36579252	rs7743396	T	C	0.22048	-0.014772	0.002213	2.56e-11	563923	-0.0133931	0.0024309	3.59807e-08	SRSF3	0.0013789	-3.14783
6	39149784	39149784	rs9394577	C	T	0.218236	-0.016843	0.002221	3.51e-14	562359	-0.0185343	0.0024379	2.90366e-14	KCNK5	-0.0016913	0.0823614
6	43069344	43069344	rs9472007	G	A	0.078263	-0.02122	0.00343	6.36e-10	562999	-0.0245969	0.00379265	8.84894e-11	PTK7	-0.0033769	0.856566
6	43233990	43233990	rs76187039	T	G	0.133414	-0.024487	0.002714	1.97e-19	563944	-0.0283111	0.0031006	6.79648e-20	TTBK1	-0.0038241	0.462182
6	43465337	43465337	rs79769045	T	C	0.054782	-0.037111	0.004055	5.98e-20	563943	-0.0407982	0.0045949	6.74559e-19	TJAP1	-0.0036872	-1.05232
6	43632389	43632389	rs77978539	C	T	0.049058	-0.032857	0.004294	2.07e-14	563005	-0.0282363	0.0048525	5.92321e-09	RSPH9	0.0046207	-5.45659
6	43736389	43736389	rs699947	A	C	0.496341	0.032916	0.001883	2.11e-68	563943	0.0355683	0.00209333	9.53996e-65	VEGFA	0.0026523	-3.65526
6	43804571	43804571	rs729761	T	G	0.286696	-0.03681	0.002065	5.25e-71	559698	-0.0240591	0.00230243	1.47363e-25	VEGFA	0.0127509	-45.4482
6	44036629	44036629	rs4711763	G	A	0.278326	0.014209	0.002161	5.02e-11	509182	0.0160722	0.00243824	4.34804e-11	RM14	0.0018632	0.0624102
6	44629660	44629660	rs535895	T	A	0.406529	0.011213	0.001874	2.24e-09	560783	0.0140055	0.00208557	1.87521e-11	SUPT3	0.0027925	2.0772
6	46846825	46846825	rs220667	A	G	0.1963	0.011327	0.002317	1.03e-06	563946	0.0148774	0.00257188	7.26576e-09	GP116	0.0035504	2.15156
6	50829471	50829471	rs4715208	A	G	0.247892	0.015633	0.002149	3.61e-13	563005	0.0166569	0.00235025	1.36761e-12	AP2B	0.0010239	-0.578455
6	52598598	52598598	rs7746808	A	C	0.392082	-0.010989	0.001897	7.11e-09	561277	-0.0115403	0.00208018	2.89381e-08	GSTA2	-0.0005513	-0.6096
6	52669759	52669759	rs58912740	C	G	0.425063	-0.023771	0.001863	2.96e-37	562860	-0.0224959	0.00213118	4.78422e-26	GSTA1	0.0012751	-11.2085
6	100944646	100944646	rs4839781	G	A	0.119563	-0.018207	0.002844	1.59e-10	562860	-0.0181028	0.00326678	2.99953e-08	ASCC3	0.0001042	-2.27566
6	125621645	125621645	rs2243389	T	C	0.17986	0.022643	0.002495	1.21e-19	559846	0.0226076	0.00275186	2.11456e-16	HDDC2	-3.54e-05	-3.24243
6	127067996	127067996	rs1101557	C	T	0.500999	0.017556	0.001908	3.72e-20	563940	0.0158699	0.00214112	1.24442e-13	RSPO3	-0.0016861	-6.52442
6	127454893	127454893	rs72959041	A	G	0.049694	0.028381	0.004461	2.06e-10	563943	-0.0662946	0.00499544	3.40891e-40	RSPO3	-0.0946756	29.7813
6	130375544	130375544	rs9398937	G	A	0.573292	0.018679	0.001853	7.29e-24	562858	0.011715	0.0020675	1.45934e-08	LMBL3	-0.006964	-15.3014
6	133977328	133977328	rs9385658	T	C	0.19208	-0.012104	0.002362	3.05e-07	562861	-0.0175497	0.00269168	7.03116e-11	EYA4	-0.0054457	3.63727
6	134203960	134203960	rs2876235	T	C	0.374801	-0.013909	0.001892	2.07e-13	563000	-0.0149076	0.00212788	2.45463e-12	TCF21	-0.0009986	-1.07402
6	135070032	135070032	rs7763056	T	G	0.197527	-0.01516	0.002301	4.59e-11	563746	-0.0191577	0.00264076	4.02733e-13	AL8A1	-0.0039977	2.0568
6	135265617	135265617	rs4646871	G	A	0.567934	0.013754	0.001865	1.7e-13	559200	0.0162695	0.00207782	4.8759e-15	AL8A1	0.0025155	1.54239
6	135418040	135418040	rs55665958	C	A	0.026161	0.034536	0.00578	2.37e-09	563942	0.0385693	0.00661017	5.38434e-09	HBS1L	0.0040333	-0.356384
6	135444492	135444492	rs111545597	G	T	0.054371	0.034994	0.004063	7.48e-18	563944	0.0322398	0.00462981	3.31843e-12	HBS1L	-0.0027542	-5.64703
6	135532832	135532832	rs56272720	G	A	0.055694	0.026655	0.004037	4.16e-11	563944	0.0263809	0.00460803	1.03443e-08	MYB	-0.0002741	-2.39561
6	135536021	135536021	rs6936293	T	C	0.119059	-0.023642	0.002886	2.71e-16	560788	-0.0236064	0.00321898	2.24207e-13	MYB	3.56e-05	-2.91768
6	136204505	136204505	rs10872447	G	A	0.546835	-0.012079	0.001853	7.42e-11	558760	-0.013079	0.0020675	2.51566e-10	PDE7B	-0.001	-0.530248
6	142716286	142716286	rs6570509	T	G	0.288498	-0.010827	0.002028	9.59e-08	563940	-0.0141324	0.00224456	3.0486e-10	GP126	-0.0033054	2.49772
6	157271239	157271239	rs74952737	A	T	0.254871	0.014653	0.002117	4.61e-12	563945	0.0160316	0.00242959	4.15395e-11	ARI1B	0.0013786	-0.95476
6	163816903	163816903	rs12194023	A	C	0.262198	0.012782	0.002088	9.56e-10	562843	0.0151964	0.00229681	3.68302e-11	QKI	0.0024144	1.41425
6	164004148	164004148	rs117700052	A	G	0.025525	-0.039986	0.005998	2.72e-11	563945	-0.0380903	0.00684975	2.68482e-08	QKI	0.0018957	-2.99435
6	166162335	166162335	rs2934849	T	C	0.36762	0.012193	0.001912	1.85e-10	559847	0.0120564	0.00211841	1.26119e-08	PDE10	-0.0001366	-1.83361
6	170585917	170585917	rs9366197	C	T	0.658207	-0.012778	0.002046	4.38e-10	508539	-0.0153617	0.0022602	1.07116e-11	DLL1	-0.0025837	1.61162
7	672509	672509	rs9771385	G	A	0.392292	-0.021922	0.001984	2.36e-28	526731	-0.0212661	0.002233	1.6734e-21	KAP1	0.0006559	-6.85069
7	1335231	1335231	rs10952012	T	G	0.202095	0.017796	0.002476	6.88e-13	488688	0.0167973	0.00273532	8.20581e-10	UNC4	-0.0009987	-3.07653
7	15047280	15047280	rs4719430	C	G	0.433036	0.011375	0.001868	1.16e-09	559702	0.0125474	0.0020804	1.6272e-09	DGKB	0.0011724	-0.146983
7	40920313	40920313	rs17689040	C	G	0.572042	-0.01072	0.001862	8.83e-09	560784	-0.0124433	0.00207524	2.02114e-09	SUCHY	-0.0017233	0.640364
7	44809276	44809276	rs1065647	G	C	0.527687	-0.010792	0.00186	6.7e-09	563000	-0.0117251	0.00207352	1.56124e-08	ZMIZ2	-0.0009331	-0.367395
7	74134911	74134911	rs35005436	C	T	0.156966	0.012693	0.002587	9.46e-07	562360	0.0166613	0.00293727	1.40834e-08	GTF2I	0.0039683	1.82718
7	82058447	82058447	rs10233444	T	C	0.387177	-0.010443	0.001887	3.23e-08	562859	-0.0114423	0.00209679	4.84093e-08	CA2D1	-0.0009993	-0.175726
7	84809167	84809167	rs2429689	T	C	0.394049	-0.012774	0.001877	1.03e-11	563938	-0.013671	0.00214269	1.76722e-10	SEM3D	-0.000897	-1.23445
7	91422096	91422096	rs2106128	A	G	0.527079	0.014935	0.001844	5.83e-16	563941	0.0139707	0.00211535	3.99e-11	MTERF	-0.0009643	-4.8353
7	91925256	91925256	rs721015	G	A	0.552616	0.016565	0.001855	4.52e-19	562360	0.017495	0.00206922	2.79351e-17	AKIB1	0.00093	-1.79101
7	98429189	98429189	rs76653850	C	G	0.004453	-0.090539	0.015654	7.5e-09	500693	-0.105805	0.0175429	1.62726e-09	TM130	-0.015266	0.663604
7	99023621	99023621	rs185613241	A	G	0.006545	-0.137938	0.012786	4.2e-27	506903	-0.129497	0.0143665	1.98988e-19	PTCD1	0.008441	-7.67558
7	99130757	99130757	rs3138	A	G	0.01382	-0.102068	0.007908	4.5e-38	563944	-0.0962534	0.00888122	2.27742e-27	ZKSC5	0.0058146	-10.7042
7	99724694	99724694	rs138428123	G	C	0.007131	-0.141202	0.011309	9.82e-36	562085	-0.132138	0.0128672	9.68488e-25	MBLC1	0.009064	-10.994
7	100159567	100159567	rs2734897	A	G	0.321351	-0.01968	0.002021	2.22e-22	562360	-0.0203362	0.00223849	1.03895e-19	AGFG2	-0.0006562	-2.67024
7	100225193	100225193	rs41295912	A	G	0.007228	-0.135638	0.011461	2.82e-32	562088	-0.129819	0.0129954	1.69167e-23	TFR2	0.005819	-8.77807
7	100317298	100317298	rs1617640	C	A	0.400736	0.031339	0.001885	4.88e-62	563945	0.0337192	0.00209506	2.78268e-58	EPO	0.0023802	-3.75604
7	101005204	101005204	rs34044303	C	T	0.594041	0.010189	0.001906	9.22e-08	562974	0.0127742	0.00216702	3.75051e-09	COQA1	0.0025852	1.39064
7	129047368	129047368	rs17552570	G	A	0.273295	0.017141	0.002073	1.42e-16	559202	0.016279	0.00230931	1.79857e-12	SAHH3	-0.000862	-4.10264
7	134660566	134660566	rs2732891	G	C	0.355634	0.012407	0.001929	1.29e-10	559696	0.0167137	0.00215922	9.89485e-15	CALD1	0.0043067	4.11518
7	150523479	150523479	rs10452847	A	T	0.205506	-0.018777	0.002276	1.65e-16	560786	-0.0172268	0.00253651	1.1095e-11	AOC1	0.0015502	-4.82764
7	150810763	150810763	rs12673943	C	T	0.369411	0.011933	0.002004	2.69e-09	510119	0.0126238	0.00225004	2.01765e-08	AGAP3	0.0006908	-0.875094
8	9196365	9196365	rs34025891	G	A	0.11654	0.021885	0.002869	2.48e-14	563944	0.0225066	0.00323151	3.29011e-12	PPR3B	0.0006216	-2.12276
8	32432796	32432796	rs2466076	G	T	0.455409	-0.013326	0.001849	5.91e-13	563945	-0.0154628	0.00211951	2.9766e-13	NRG1	-0.0021368	0.297867
8	37649261	37649261	rs7840232	C	T	0.197901	-0.014423	0.002354	9.24e-10	563902	-0.0148023	0.00265683	2.52695e-08	GP124	-0.0003793	-1.43692
8	40043071	40043071	rs6985919	A	G	0.564858	-0.017414	0.001859	8.02e-21	563940	-0.0185155	0.00207266	4.13713e-19	CH004	-0.0011015	-1.71252
8	41543675	41543675	rs34664882	A	G	0.033303	0.047367	0.005128	2.7e-20	562362	0.0428853	0.00580757	1.53158e-13	ANK1	-0.0044817	-6.75378
8	41630405	41630405	rs4737009	A	G	0.235753	-0.016268	0.002185	1.01e-13	559198	-0.0166483	0.00240642	4.57129e-12	ANK1	-0.0003803	-1.65572
8	42426961	42426961	rs2974309	G	A	0.409055	-0.024436	0.001868	4.54e-39	563941	-0.0241933	0.0020804	2.92966e-31	SMI19	0.0002427	-7.80976
8	47864052	47864052	rs11786549	T	C	0.656183	-0.011376	0.001955	6.08e-09	562857	-0.0148216	0.00215567	6.17124e-12	SPIDR	-0.0034456	2.99353
8	48405343	48405343	rs1106607	G	C	0.616611	-0.01103	0.001905	7.17e-09	562860	-0.0148207	0.00211235	2.2793e-12	SPIDR	-0.0037907	3.49772
8	48846519	48846519	rs1231202	T	C	0.05223	0.02637	0.00418	2.9e-10	560506	0.0264405	0.00467424	1.54364e-08	PRKDC	7.05e-05	-1.72615
8	48948896	48948896	rs56171381	T	A	0.568712	-0.01062	0.001901	2.36e-08	562854	-0.0141345	0.00216299	6.37422e-11	UB2V2	-0.0035145	2.56848
8	81583418	81583418	rs112232110	C	A	0.063902	-0.024999	0.003782	3.98e-11	563941	-0.0277238	0.00433762	1.64297e-10	ZN704	-0.0027248	-0.615747
8	81820594	81820594	rs10957988	T	C	0.411214	0.011735	0.001873	3.83e-10	563944	0.0154577	0.00208471	1.21805e-13	ZN704	0.0037227	3.49753
8	95654723	95654723	rs1365201	T	C	0.156054	0.014637	0.002551	9.85e-09	563945	0.0156019	0.00285197	4.48581e-08	ESRP1	0.0009649	-0.658405
8	95937502	95937502	rs7845219	T	C	0.505672	0.022441	0.001844	4.75e-34	562355	0.0225104	0.00203396	1.80825e-28	NDUF6	6.94e-05	-5.58056
8	98640062	98640062	rs1031868	G	A	0.077475	0.018279	0.00345	1.2e-07	563943	0.0215176	0.00383566	2.02467e-08	LYRIC	0.0032386	0.772827
8	116559435	116559435	rs3808434	A	G	0.443878	-0.019481	0.001852	7.55e-26	563945	-0.0210275	0.00204093	6.83588e-25	TRPS1	-0.0015465	-0.956847
8	128972721	128972721	rs9649959	G	A	0.34338	-0.022141	0.00194	3.86e-30	560785	-0.0231077	0.00216865	1.64615e-26	TMM75	-0.0009667	-3.62988
8	129083459	129083459	rs2720666	G	A	0.377568	-0.014576	0.0019	1.79e-14	559699	-0.0140596	0.00208282	1.47544e-11	TMM75	0.0005164	-2.91607
8	137067091	137067091	rs2016655	T	C	0.458378	-0.010872	0.00185	4.31e-09	563940	-0.0117348	0.00212034	3.12286e-08	KHDR3	-0.0008628	-0.860075
9	6328947	6328947	rs3847262	T	C	0.051589	-0.037857	0.004164	1.04e-19	559205	-0.04154	0.0046081	1.97676e-19	TPD55	-0.003683	-0.278921
9	33121570	33121570	rs10813948	A	G	0.31522	-0.011752	0.001981	3.05e-09	563853	-0.0166805	0.00225849	1.51694e-13	B4GT1	-0.0049285	4.30333
9	73124343	73124343	rs56184018	T	A	0.354166	-0.012128	0.001958	6.1e-10	547992	-0.0145745	0.00223926	7.58321e-11	TRPM3	-0.0024465	0.905477
9	79771788	79771788	rs10747013	C	G	0.49573	-0.011137	0.001862	2.3e-09	549078	-0.0125147	0.00213035	4.24087e-09	VP13A	-0.0013777	-0.265727
9	98265780	98265780	rs16909919	T	C	0.331472	-0.011257	0.001959	9.35e-09	560785	-0.0120514	0.00218483	3.46868e-08	PTC1	-0.0007944	-0.569353
9	107665978	107665978	rs1800978	G	C	0.125957	0.00515	0.002793	0.065229	563945	0.0212117	0.00308689	6.35132e-12	ABCA1	0.0160617	10.0116
9	107791702	107791702	rs498275	A	G	0.337529	0.010769	0.001956	3.79e-08	562329	0.0130083	0.00218238	2.51351e-09	ABCA1	0.0022393	1.17836
9	109559157	109559157	rs10816434	G	A	0.219859	0.012834	0.00224	1.03e-08	563944	0.0150032	0.00250559	2.12574e-09	ZN462	0.0021692	0.685327
9	111941857	111941857	rs908859	T	C	0.153401	-0.01342	0.002555	1.53e-07	563006	-0.0193434	0.0028554	1.24999e-11	E41LB	-0.0059234	4.08778
9	114824471	114824471	rs10046809	G	A	0.299458	-0.015643	0.002032	1.44e-14	563001	-0.0173663	0.00230124	4.47071e-14	SUSD1	-0.0017233	-0.492014
9	114900718	114900718	rs67118370	A	G	0.219671	-0.017893	0.002215	6.9e-16	563904	-0.0224752	0.00251152	3.59297e-19	SUSD1	-0.0045822	3.2834
9	114947829	114947829	rs7031304	C	T	0.459027	-0.015225	0.00186	2.89e-16	563937	-0.0168088	0.00212868	2.87113e-15	SUSD1	-0.0015838	-0.997155
9	115539694	115539694	rs34627036	C	A	0.285966	-0.013979	0.00203	5.95e-12	563942	-0.0154956	0.00232817	2.81947e-11	SNX30	-0.0015166	-0.675651
9	124127005	124127005	rs2416829	C	A	0.394588	-0.010495	0.001888	2.8e-08	563945	-0.0119078	0.00209765	1.37281e-08	STOM	-0.0014128	0.309548
9	133459321	133459321	rs73547962	G	A	0.11215	0.015865	0.002922	5.76e-08	563941	0.0206541	0.00333185	5.68196e-10	FUBP3	0.0047891	2.00592
9	135468246	135468246	rs7859473	C	T	0.014938	0.051287	0.007799	4.99e-11	563945	0.060419	0.0090769	2.80722e-11	DDX31	0.009132	0.249824
9	136000950	136000950	rs614515	A	G	0.471808	-0.011311	0.001948	6.6e-09	509034	-0.0126554	0.0022026	9.1561e-09	GNDS	-0.0013444	-0.142167
9	136155000	136155000	rs635634	T	C	0.18577	-0.078055	0.002374	6.42e-237	563301	-0.0788803	0.00264701	3.93221e-195	SURF6	-0.0008253	-41.7871
9	136388223	136388223	rs11534419	T	C	0.357521	0.018311	0.002056	5.69e-19	509183	0.0212064	0.00232169	6.59876e-20	TMM8C	0.0028954	0.93565
9	137265361	137265361	rs62576340	A	G	0.178025	0.015069	0.002526	2.52e-09	510122	0.0174452	0.00285786	1.03261e-09	RXRA	0.0023762	0.387464
10	4497033	4497033	rs1679421	A	T	0.258248	0.012902	0.002105	9.18e-10	563942	0.0141796	0.00236335	1.97547e-09	AKCL2	0.0012776	-0.332828
10	13557945	13557945	rs2399972	C	G	0.337421	0.014181	0.001954	4.09e-13	560787	0.01394	0.00218066	1.63131e-10	BEND7	-0.000241	-2.60081
10	13737841	13737841	rs10906449	T	C	0.50063	-0.0158	0.001864	2.42e-17	562360	-0.0146981	0.00207696	1.47579e-12	FRM4A	0.0011019	-4.78521
10	36461567	36461567	rs1451193	A	G	0.497257	0.013531	0.001847	2.48e-13	561273	0.0141844	0.00203657	3.28766e-12	FZD8	0.0006534	-1.12244
10	45382361	45382361	rs7903412	C	T	0.417974	0.012578	0.001891	2.98e-11	562861	0.012544	0.00215442	5.79882e-09	TMM72	-3.4e-05	-2.28912
10	45953767	45953767	rs7908745	G	A	0.314381	0.014157	0.001982	9.58e-13	559203	0.0122606	0.00220477	2.68315e-08	MARH8	-0.0018964	-4.44728
10	60276083	60276083	rs1896245	T	G	0.539066	-0.017164	0.001842	1.25e-20	563946	-0.0181623	0.00205805	1.09451e-18	BICC1	-0.0009983	-1.94231
10	61290795	61290795	rs150486706	G	A	0.029798	0.029175	0.005521	1.29e-07	563946	0.0357958	0.00630743	1.38549e-08	MOT9	0.0066208	0.968986
10	61469090	61469090	rs1171615	C	T	0.229896	-0.014085	0.002201	1.61e-10	563944	-0.0137758	0.00244566	1.7737e-08	MOT9	0.0003092	-2.04205
10	70681710	70681710	rs73268355	T	C	0.01812	0.044223	0.006974	2.36e-10	562995	0.0442568	0.00792409	2.33576e-08	DDX50	3.38e-05	-1.99552
10	71065688	71065688	rs12765993	C	T	0.076647	0.057991	0.003574	3.77e-59	563944	0.061023	0.0040218	5.33415e-52	HXK1	0.003032	-7.15072
10	71089679	71089679	rs12355201	G	A	0.366635	-0.015613	0.001947	1.11e-15	563003	-0.0160954	0.0021487	6.84749e-14	HXK1	-0.0004824	-1.79021
10	71094504	71094504	rs17476364	C	T	0.106559	0.144395	0.002997	0	563936	0.145671	0.00336768	0	HXK1	0.001276	0
10	71112111	71112111	rs10998736	T	G	0.105818	-0.025118	0.003	5.97e-17	563942	-0.0273585	0.00329253	9.62886e-17	HXK1	-0.0022405	-0.207601
10	71138133	71138133	rs10128330	T	C	0.043201	0.061321	0.004633	6.05e-40	562981	0.0577027	0.00519561	1.17227e-28	HXK1	-0.0036183	-11.2873
10	71256003	71256003	rs12416663	A	T	0.088407	0.025086	0.003322	4.48e-14	560784	0.0257404	0.0037261	4.91063e-12	TSN15	0.0006544	-2.03986
10	80785567	80785567	rs11002782	A	G	0.578205	0.007942	0.001867	2.12e-05	559698	0.0132844	0.00207954	1.67919e-10	ZMIZ1	0.0053424	5.10124
10	81333412	81333412	rs193162755	A	C	0.067074	-0.022756	0.003894	5.26e-09	508756	-0.0258277	0.00437582	3.58325e-09	SFPA2	-0.0030717	0.166709
10	82154496	82154496	rs12772945	T	C	0.132966	-0.017847	0.002703	4.2e-11	563941	-0.0186077	0.00300899	6.24857e-10	F213A	-0.0007607	-1.17253
10	88939962	88939962	rs7081609	T	C	0.151072	-0.019489	0.002613	9.16e-14	563944	-0.0204532	0.00290531	1.92325e-12	FA35A	-0.0009642	-1.32214
10	93362686	93362686	rs11186623	T	C	0.360104	-0.009471	0.001932	9.61e-07	562361	-0.0128803	0.00216179	2.55067e-09	PPR3C	-0.0034093	2.57607
10	96429971	96429971	rs2104543	T	C	0.214569	-0.012587	0.002238	1.89e-08	562359	-0.0135178	0.00247778	4.88043e-08	CP2CI	-0.0009308	-0.411996
10	97260115	97260115	rs7100779	G	T	0.170163	-0.015601	0.002458	2.27e-10	563002	-0.0178055	0.00271968	5.87345e-11	SRBS1	-0.0022045	0.587133
10	104491164	104491164	rs1475644	A	G	0.298384	0.012097	0.002005	1.67e-09	563940	0.0182307	0.0021994	1.14243e-16	SFXN2	0.0061337	7.16489
10	119319392	119319392	rs11198034	T	C	0.615322	0.004143	0.001902	0.029438	563005	0.0123806	0.00216383	1.05503e-08	EMX2	0.0082376	6.44564
10	126733978	126733978	rs2949371	A	G	0.450111	-0.010363	0.001848	2.11e-08	563004	-0.0133654	0.00203744	5.38541e-11	CTBP2	-0.0030024	2.59306
11	1689325	1689325	rs7131362	A	G	0.410237	0.009128	0.001983	4.23e-06	508534	0.0121262	0.00218012	2.66434e-08	KRA56	0.0029982	2.20075
11	6664661	6664661	rs2659864	G	T	0.397755	0.011941	0.001901	3.44e-10	563004	0.0133194	0.00216281	7.34974e-10	PCD16	0.0013784	-0.329714
11	8866808	8866808	rs7123429	C	G	0.442016	-0.026652	0.001861	1.75e-46	563943	-0.0320275	0.00207438	8.8683e-54	ST5	-0.0053755	7.2952
11	9917911	9917911	rs78514621	T	G	0.105852	-0.026184	0.003002	2.85e-18	563928	-0.0321113	0.00337194	1.6811e-21	MTMRD	-0.0059273	3.22925
11	10183300	10183300	rs10770097	A	G	0.226431	0.017533	0.002327	5.12e-14	546472	0.0213931	0.00263409	4.59908e-16	MTMRD	0.0038601	2.0466
11	10203610	10203610	rs10500721	G	A	0.245878	-0.040816	0.002139	4.16e-81	563945	-0.0428832	0.00236638	2.14127e-73	MTMRD	-0.0020672	-7.71158
11	10468501	10468501	rs11605232	C	T	0.469946	0.011125	0.001877	3.19e-09	547566	0.015848	0.00214288	1.4068e-13	AMPD3	0.004723	4.35556
11	10691080	10691080	rs903823	G	A	0.388789	-0.015352	0.001889	4.63e-16	562361	-0.0146279	0.00209851	3.1561e-12	MRVI1	0.0007241	-3.83357
11	27667236	27667236	rs17309874	A	G	0.257223	-0.010832	0.002101	2.59e-07	563944	-0.0128546	0.0023081	2.55711e-08	BDNF	-0.0020226	1.00555
11	30751010	30751010	rs795237	C	T	0.43225	-0.02027	0.001861	1.38e-27	563945	-0.0196828	0.00207438	2.34317e-21	DCDC1	0.0005872	-6.22992
11	30974203	30974203	rs10767883	A	T	0.578986	0.020264	0.001873	3.09e-27	560786	0.0210574	0.00208471	5.4748e-24	DCDC1	0.0007934	-3.24841
11	60960136	60960136	rs557309	G	A	0.400694	-0.010697	0.001908	2.12e-08	561275	-0.011834	0.00214112	3.2574e-08	PEPA3	-0.001137	-0.186535
11	61571382	61571382	rs174549	A	G	0.306528	0.031268	0.001999	4.12e-55	560784	0.0341641	0.00219423	1.16543e-54	FADS1	0.0028961	-0.451589
11	61657110	61657110	rs174460	T	C	0.690418	-0.024681	0.002039	1.12e-33	562998	-0.0289219	0.00227998	7.14388e-37	FADS3	-0.0042409	3.19528
11	74269061	74269061	rs12798723	C	G	0.102153	-0.022051	0.003042	4.4e-13	563942	-0.0191549	0.00337955	1.44563e-08	DPOD3	0.0028961	-4.5166
11	75455021	75455021	rs499974	A	C	0.159016	0.021905	0.002522	3.94e-18	559201	0.0216989	0.00275104	3.08243e-15	MOGT2	-0.0002061	-2.8934
11	84664704	84664704	rs6592223	A	G	0.21339	0.012345	0.002245	3.92e-08	563940	0.0144839	0.00248385	5.50283e-09	DLG2	0.0021389	0.8527
11	111208518	111208518	rs1893993	C	T	0.462186	0.016531	0.001843	3.21e-19	562358	0.0132917	0.00205891	1.07715e-10	OBF1	-0.0032393	-8.52577
11	118719254	118719254	rs2156750	C	T	0.245849	-0.011502	0.002135	7.31e-08	563944	-0.0133995	0.00244458	4.22161e-08	CXCR5	-0.0018975	0.238439
12	4330215	4330215	rs4573764	T	C	0.210119	-0.020668	0.002267	8.29e-20	560786	-0.023391	0.00252877	2.24576e-20	CCND2	-0.002723	0.567191
12	11829309	11829309	rs2541119	G	A	0.032155	-0.035871	0.005345	2e-11	544429	-0.0399382	0.00586366	9.68283e-12	ETV6	-0.0040672	0.315028
12	15307168	15307168	rs10846153	G	A	0.520006	-0.012643	0.001858	1.05e-11	559205	-0.0161578	0.0020718	6.24241e-15	RERG	-0.0035148	3.22584
12	21712930	21712930	rs1871139	A	G	0.203268	-0.01587	0.002285	3.93e-12	563946	-0.0157321	0.00259857	1.41179e-09	GYS2	0.0001379	-2.55538
12	52236834	52236834	rs303786	G	A	0.464654	0.01087	0.001856	4.88e-09	562860	0.0134882	0.00212534	2.20491e-10	SCN8A	0.0026182	1.34503
12	52306027	52306027	rs2277381	G	C	0.113097	0.023762	0.002911	3.46e-16	563944	0.026487	0.00326705	5.17527e-16	ACVL1	0.002725	-0.174857
12	53817916	53817916	rs2272002	A	T	0.158217	0.014063	0.002512	2.23e-08	563938	0.0160662	0.00279215	8.71149e-09	AMHR2	0.0020032	0.408212
12	57844049	57844049	rs3741414	T	C	0.238469	0.02079	0.002152	4.79e-22	562997	0.0212059	0.00237767	4.71479e-19	INHBC	0.0004159	-2.99313
12	64428763	64428763	rs73130130	G	T	0.268277	-0.009824	0.002101	2.98e-06	562971	-0.0149932	0.00238742	3.3835e-10	SRGP1	-0.0051692	3.94485
12	89624206	89624206	rs11105213	G	A	0.140537	0.015274	0.002652	8.66e-09	563941	0.0160674	0.00293903	4.5797e-08	DUS6	0.0007934	-0.723319
12	94980601	94980601	rs1807783	T	G	0.428421	0.012166	0.00187	7.94e-11	562212	0.0127875	0.00208212	8.17133e-10	TMCC3	0.0006215	-1.01247
12	110329431	110329431	rs4586234	T	C	0.136017	0.021486	0.002812	2.26e-14	563934	0.0187277	0.0032112	5.47686e-09	TCHP	-0.0027583	-5.38442
12	110722632	110722632	rs3026444	G	A	0.232857	-0.015634	0.00218	7.72e-13	563001	-0.0155249	0.00245462	2.53606e-10	AT2A2	0.0001091	-2.51654
12	111905245	111905245	rs73201772	T	C	0.116266	-0.04821	0.002882	8.79e-63	562845	-0.048588	0.00324257	9.28676e-51	ATX2	-0.000378	-12.0239
12	111984054	111984054	rs56390488	C	T	0.047189	-0.027533	0.004362	2.84e-10	563006	-0.0295325	0.00488398	1.4773e-09	ATX2	-0.0019995	-0.71615
12	112416794	112416794	rs111436404	C	T	0.090179	-0.040935	0.003214	4.05e-37	563946	-0.0396918	0.00363414	9.05669e-28	TM116	0.0012432	-9.34951
12	112714268	112714268	rs73207635	A	T	0.024475	-0.042459	0.005987	1.37e-12	563945	-0.0437318	0.00684055	1.62642e-10	HECD4	-0.0012728	-2.07451
12	115383818	115383818	rs10774783	G	A	0.428938	0.013611	0.001881	4.85e-13	562359	0.0190561	0.00206616	2.89002e-20	TBX3	0.0054451	7.22484
12	120870877	120870877	rs12315712	A	G	0.09989	0.017602	0.003097	1.36e-08	563000	0.0201167	0.00353547	1.27063e-08	CX6A1	0.0025147	0.0295198
12	121431225	121431225	rs1169300	A	G	0.295236	0.023419	0.002027	7.52e-31	562358	0.0231777	0.00221872	1.52197e-25	HNF1A	-0.0002413	-5.30619
12	123192599	123192599	rs11059476	T	C	0.057022	-0.008433	0.004193	0.044351	562533	-0.0350137	0.00473933	1.49179e-13	HCAR1	-0.0265807	11.4732
12	124489162	124489162	rs11057413	G	A	0.334277	-0.009572	0.002053	3.16e-06	503755	0.0147968	0.00231915	1.76755e-10	F101A	0.0243688	4.25232
12	124535999	124535999	rs12422529	C	G	0.587148	0.007119	0.001875	0.000148	563869	-0.0134578	0.0021412	3.27498e-10	F101A	-0.0205768	5.65505
13	49180829	49180829	rs9562829	T	C	0.261959	0.011808	0.0021	1.94e-08	563945	0.0140835	0.00238658	3.60994e-09	RCBT2	0.0022755	0.730302
13	51035164	51035164	rs9568416	T	C	0.138231	-0.010081	0.00267	0.000161	563944	-0.0238348	0.00303526	4.07413e-15	LEU1	-0.0137538	10.5968
13	51386889	51386889	rs1841677	T	C	0.566891	0.01301	0.001869	3.52e-12	562852	0.0133899	0.00208126	1.24678e-10	LEU7	0.0003799	-1.54925
13	71647476	71647476	rs803764	G	A	0.391044	-0.011646	0.001898	8.71e-10	559203	-0.0115056	0.00210629	4.69559e-08	DACH1	0.0001404	-1.73167
13	96077077	96077077	rs35807855	A	G	0.171828	0.013846	0.002444	1.5e-08	563001	0.0162593	0.00278888	5.5413e-09	CLD10	0.0024133	0.43248
13	110419354	110419354	rs12584136	A	C	0.053067	0.024469	0.004141	3.54e-09	559204	0.0261228	0.00461432	1.50276e-08	IRS2	0.0016538	-0.627886
14	21565189	21565189	rs2319627	C	T	0.171153	-0.023469	0.002447	9.39e-22	559699	-0.0225397	0.00273623	1.75845e-16	ZN219	0.0009293	-5.27246
14	24809185	24809185	rs3212251	C	T	0.046417	0.025636	0.004388	5.3e-09	562358	0.0294238	0.0048537	1.34328e-09	RIPK3	0.0037878	0.596109
14	34645201	34645201	rs797345	C	T	0.315727	-0.01884	0.001997	4.28e-21	561277	-0.0193579	0.00221772	2.57468e-18	EGLN3	-0.0005179	-2.77928
14	34715321	34715321	rs12895303	A	G	0.366077	0.012714	0.001913	3.14e-11	563944	0.0153641	0.00211915	4.16368e-13	EGLN3	0.0026501	1.87745
14	64872752	64872752	rs57486119	A	T	0.091354	-0.02268	0.003277	4.68e-12	561852	-0.0205434	0.00374329	4.06366e-08	C1TC	0.0021366	-3.93867
14	65288069	65288069	rs117175139	G	T	0.021678	-0.043615	0.00652	2.32e-11	563942	-0.0502638	0.00745819	1.59022e-11	SPTB1	-0.0066488	0.164031
14	66110797	66110797	rs11158607	T	G	0.340208	-0.015959	0.001948	2.72e-16	563946	-0.0160248	0.00217551	1.7582e-13	FUT8	-6.58e-05	-2.8105
14	68377707	68377707	rs2009191	A	G	0.200072	0.013749	0.002311	2.76e-09	563927	0.0170916	0.00262058	6.93419e-11	RA51B	0.0033426	1.59991
14	69272319	69272319	rs4899258	G	T	0.285065	-0.013195	0.002042	1.07e-10	562860	-0.0152975	0.00233816	6.04864e-11	TISB	-0.0021025	0.247726
14	99698931	99698931	rs1257415	A	C	0.502966	0.014935	0.00186	1.02e-15	562358	0.0158623	0.00207352	2.01082e-14	BC11B	0.0009273	-1.29477
14	102975552	102975552	rs3742445	A	T	0.269311	0.013071	0.002123	7.68e-10	563937	0.0158283	0.0024061	4.75452e-11	ANKR9	0.0027573	1.20825
14	103944912	103944912	rs11625172	A	G	0.366272	0.012978	0.001909	1.1e-11	563741	0.0143258	0.00211569	1.27711e-11	MARK3	0.0013478	-0.0648356
14	104190527	104190527	rs10138768	A	G	0.57214	-0.012002	0.001916	3.86e-10	562999	-0.0120048	0.00212188	1.53483e-08	ZFY21	-2.8e-06	-1.59947
14	105585608	105585608	rs7159216	A	G	0.105387	-0.017096	0.003016	1.48e-08	559200	-0.0216117	0.00335711	1.21381e-10	JAG2	-0.0045157	2.08611
15	33332084	33332084	rs1869663	T	C	0.180168	0.018846	0.002406	5.02e-15	562363	0.0192236	0.00264921	3.97725e-13	FMN1	0.0003776	-1.89888
15	43551023	43551023	rs524547	T	C	0.323885	-0.012848	0.001961	5.91e-11	563943	-0.0138153	0.00218668	2.65086e-10	TGM5	-0.0009673	-0.651799
15	43726625	43726625	rs150844304	C	A	0.025921	-0.085974	0.005853	8.34e-49	563943	-0.0949431	0.0066999	1.3889e-45	TP53B	-0.0089691	-3.2215
15	45341718	45341718	rs2470686	A	C	0.110823	-0.018071	0.003001	1.78e-09	560788	-0.0234114	0.0033983	5.61268e-12	DHSO	-0.0053404	2.50125
15	51001207	51001207	rs12912835	T	C	0.11873	0.019292	0.002842	1.18e-11	563906	0.018325	0.00323624	1.49247e-08	SPP2A	-0.000967	-3.10202
15	58680954	58680954	rs2043085	C	T	0.613351	0.017058	0.001889	1.81e-19	562363	0.0155075	0.00207317	7.42708e-14	AL1A2	-0.0015505	-5.61314
15	60928481	60928481	rs58558667	T	G	0.370661	-0.015463	0.00192	8.51e-16	563005	-0.0140132	0.0021788	1.26273e-10	RORA	0.0014498	-5.17138
15	63355275	63355275	rs11071723	A	T	0.197135	0.016292	0.002324	2.49e-12	563945	0.0183936	0.00257793	9.67633e-13	TPM1	0.0021016	0.410489
15	66044551	66044551	rs10431765	G	A	0.571101	0.017492	0.001867	7.81e-21	563893	0.0168031	0.00207954	6.46541e-16	MYCPP	-0.0006889	-4.91795
15	66911126	66911126	rs10400898	T	C	0.441208	-0.01237	0.001876	4.45e-11	563002	-0.015438	0.00214204	5.7126e-13	LCTL	-0.003068	1.89153
15	66963541	66963541	rs77256149	T	C	0.260925	-0.012755	0.0022	6.89e-09	563858	-0.0136863	0.00249902	4.33377e-08	SMAD6	-0.0009313	-0.798647
15	66999828	66999828	rs3809569	G	A	0.246318	0.017351	0.002163	1.08e-15	562353	0.0255182	0.00238724	1.14112e-26	SMAD6	0.0081672	10.9761
15	67437385	67437385	rs12439792	A	T	0.090437	-0.01952	0.003337	5.07e-09	563922	-0.021658	0.00368679	4.24186e-09	SMAD3	-0.002138	0.0774516
15	72136872	72136872	rs4777466	T	C	0.2614	-0.017205	0.002097	2.46e-16	563941	-0.0182769	0.00233001	4.35936e-15	MYO9A	-0.0010719	-1.24849
15	72511415	72511415	rs3759901	A	G	0.019892	-0.042543	0.006562	9.28e-11	563299	-0.0467526	0.00725049	1.13185e-10	KPYM	-0.0042096	-0.0862409
15	75080685	75080685	rs8033381	G	A	0.26346	0.017522	0.002113	1.18e-16	563944	0.0224814	0.0023187	3.14428e-22	CSK	0.0049594	5.57436
15	75385622	75385622	rs7162941	T	C	0.37223	0.014365	0.001897	3.84e-14	563942	0.01643	0.00208018	2.82646e-15	COAC	0.002065	1.13309
15	75928192	75928192	rs7166281	G	T	0.25223	-0.018029	0.002168	9.69e-17	560786	-0.0134807	0.00241732	2.45105e-08	IMP3	0.0045483	-8.40303
15	77142106	77142106	rs3106376	A	G	0.017234	0.059753	0.007134	5.78e-17	563943	0.0568606	0.0079778	1.02318e-12	SCAPE	-0.0028924	-4.24802
15	77264576	77264576	rs17465510	A	G	0.073573	-0.019048	0.003584	1.09e-07	560786	-0.0221534	0.00400379	3.1464e-08	PPIP1	-0.0031054	0.539613
15	78011104	78011104	rs11854808	A	G	0.278991	-0.012928	0.002098	7.37e-10	561852	-0.0132098	0.00238489	3.04278e-08	LIGO1	-0.0002818	-1.6158
15	85617810	85617810	rs28718705	C	G	0.209798	-0.013992	0.002264	6.63e-10	563939	-0.0157509	0.00258108	1.04466e-09	PDE8A	-0.0017589	-0.197461
16	4234917	4234917	rs4786466	A	C	0.560084	0.009886	0.001881	1.5e-07	563940	0.0130223	0.00214622	1.29879e-09	SRCA	0.0031363	2.06255
16	4922201	4922201	rs12446456	T	C	0.429463	-0.011023	0.001862	3.33e-09	560781	-0.012328	0.00207524	2.84065e-09	UBN1	-0.001305	0.0690265
16	28593347	28593347	rs17707300	C	T	0.377222	-0.011553	0.001901	1.26e-09	559841	-0.013301	0.00208369	1.73231e-10	SGF29	-0.001748	0.861745
16	28977713	28977713	rs1137843	C	T	0.359137	0.012698	0.001931	5.01e-11	563891	0.01345	0.00221677	1.30003e-09	NF2IP	0.000752	-1.41412
16	29966277	29966277	rs11646127	C	G	0.457739	-0.013414	0.001866	6.87e-13	563945	-0.0180578	0.00213368	2.6009e-17	TM219	-0.0046438	4.42183
16	51165891	51165891	rs2111125	T	C	0.354712	0.016333	0.001929	2.64e-17	561275	0.0166096	0.00215922	1.44412e-14	SALL1	0.0002766	-2.738
16	67305513	67305513	rs7186310	C	A	0.110047	0.015446	0.002949	1.66e-07	563000	0.0249261	0.00324792	1.66074e-14	SL9A5	0.0094801	6.99981
16	67927124	67927124	rs7196789	T	C	0.168492	0.024926	0.002464	4.98e-24	562984	0.0300949	0.0027	7.46627e-29	KPSH1	0.0051689	4.82413
16	68425493	68425493	rs12927428	C	G	0.469205	0.010312	0.001867	3.39e-08	559840	0.0134854	0.00213452	2.65371e-10	NSMA2	0.0031734	2.10635
16	71386740	71386740	rs62055044	T	G	0.04845	0.024566	0.004315	1.28e-08	563002	0.0335914	0.00492646	9.19489e-12	CALB2	0.0090254	3.14366
16	71615613	71615613	rs4788808	C	T	0.483695	-0.01185	0.001848	1.48e-10	559202	-0.0134717	0.00211868	2.03655e-10	ATTY	-0.0016217	-0.138633
16	87876175	87876175	rs55694638	T	C	0.270115	0.014808	0.00218	1.15e-11	510121	0.015013	0.00245425	9.52729e-10	LAT1	0.000205	-1.91827
16	88799417	88799417	rs2340987	C	G	0.174666	0.027711	0.002556	2.35e-27	510119	0.0239548	0.00288327	9.71543e-17	PIEZ1	-0.0037562	-10.6164
16	88853729	88853729	rs837763	C	T	0.44348	0.043716	0.001947	1.29e-111	508536	0.0444042	0.0021242	4.92567e-97	PIEZ1	0.0006882	-14.5819
16	88868458	88868458	rs111504770	A	G	0.009461	-0.061633	0.010115	1.14e-09	507799	-0.0634628	0.0112521	1.6995e-08	CDT1	-0.0018298	-1.17342
16	89326602	89326602	rs7192049	C	G	0.041374	0.034331	0.004727	3.93e-13	563936	0.0318078	0.0052242	1.13928e-09	ANR11	-0.0025232	-3.46224
16	89431603	89431603	rs3096309	C	T	0.171528	-0.014293	0.002484	8.93e-09	559205	-0.0183926	0.00276801	3.03818e-11	ANR11	-0.0040996	2.46824
16	89686245	89686245	rs9673820	C	T	0.236562	-0.015246	0.002355	9.89e-11	506622	-0.0157328	0.00265779	3.22928e-09	DPEP1	-0.0004868	-1.51391
16	89699664	89699664	rs4785581	A	C	0.441878	0.023276	0.001916	6.26e-34	563940	0.0221408	0.0021756	2.51544e-24	DPEP1	-0.0011352	-9.60404
16	89739903	89739903	rs2118193	A	G	0.226063	-0.028067	0.002254	1.49e-35	563942	-0.0298262	0.0025445	9.85202e-32	SPT33	-0.0017592	-3.82034
17	1246876	1246876	rs77987645	G	C	0.079635	0.021072	0.00341	6.63e-10	563943	0.026792	0.00388321	5.22041e-12	1433E	0.00572	2.10381
17	7366619	7366619	rs34914463	C	T	0.126654	-0.028482	0.002811	4.31e-24	562361	-0.0360995	0.00321036	2.45967e-29	ZBTB4	-0.0076175	5.2436
17	7448457	7448457	rs4968200	C	G	0.142669	-0.019488	0.002642	1.68e-13	563945	-0.0260016	0.00293037	7.11184e-19	TNF12	-0.0065136	5.37333
17	7720858	7720858	rs872345	T	A	0.184236	0.014839	0.002513	3.62e-09	563001	0.0173219	0.00281946	8.06262e-10	DYH2	0.0024829	0.652232
17	7739664	7739664	rs4130668	T	C	0.221432	0.014292	0.00226	2.63e-10	561920	0.0159833	0.00249689	1.54051e-10	DYH2	0.0016913	0.232291
17	7792465	7792465	rs2279620	C	G	0.112773	0.024466	0.002948	1.11e-16	563944	0.0297446	0.00329869	1.93101e-19	CHD3	0.0052786	2.75954
17	7870642	7870642	rs117285318	C	T	0.076475	-0.029361	0.003521	7.88e-17	560912	-0.0344636	0.00403334	1.28902e-17	CNTRB	-0.0051026	0.786267
17	7950958	7950958	rs61312861	A	G	0.05125	0.024552	0.004239	7.16e-09	546653	0.0302429	0.00480602	3.11997e-10	LX15B	0.0056909	1.36076
17	8246080	8246080	rs61482739	G	C	0.336385	0.016734	0.00195	9.92e-18	563940	0.0161469	0.00223259	4.74698e-13	ODFP4	-0.0005871	-4.67991
17	14819936	14819936	rs4792558	T	C	0.254789	-0.015268	0.002123	6.71e-13	560788	-0.0177496	0.00243458	3.08526e-13	PMP22	-0.0024816	0.337431
17	16848565	16848565	rs4500785	G	C	0.105104	-0.017403	0.003026	9.11e-09	563943	-0.0214702	0.00344748	4.73072e-10	TR13B	-0.0040672	1.28459
17	16971521	16971521	rs4985717	G	A	0.263884	0.014034	0.002088	1.85e-11	563939	0.0205139	0.00237649	6.02835e-18	MPRIP	0.0064799	6.48697
17	18124470	18124470	rs11654741	A	C	0.193064	-0.014461	0.002332	5.74e-10	563939	-0.0198378	0.00266658	1.01135e-13	L2GL1	-0.0053768	3.75401
17	19927699	19927699	rs1034904	T	C	0.524399	0.014101	0.001842	1.99e-14	563943	0.0140315	0.00205805	9.24144e-12	CYTSB	-6.95e-05	-2.66689
17	21104746	21104746	rs1109514	A	G	0.484848	0.011178	0.001862	2e-09	563944	0.0113825	0.00207524	4.13685e-08	TMM11	0.0002045	-1.31564
17	26817115	26817115	rs11652129	C	A	0.03526	0.030627	0.005248	5.5e-09	563935	0.0345891	0.00596476	6.67447e-09	S13A2	0.0039621	-0.0840541
17	26956993	26956993	rs4470192	T	C	0.233401	-0.01205	0.002191	3.9e-08	562856	-0.0166326	0.00249145	2.45767e-11	K0100	-0.0045826	3.20054
17	27172520	27172520	rs28847895	C	T	0.20509	0.020547	0.002285	2.61e-19	562690	0.0249544	0.0025987	7.78994e-22	F222B	0.0044074	2.52511
17	28167941	28167941	rs2169810	A	G	0.494342	0.012398	0.001843	1.8e-11	563944	0.0134702	0.00203309	3.46095e-11	SSH2	0.0010722	-0.283923
17	29114229	29114229	rs1061346	A	G	0.116465	0.020568	0.002863	7.09e-13	562360	0.0252225	0.00319922	3.1722e-15	CRLF3	0.0046545	2.34929
17	37670994	37670994	rs4794813	A	T	0.251915	0.019516	0.002126	4.65e-20	562086	0.0241017	0.00238155	4.49583e-24	CDK12	0.0045857	4.01464
17	38182844	38182844	rs2302775	C	T	0.238881	0.011312	0.002173	1.96e-07	559202	0.0160686	0.00242162	3.23402e-11	MED24	0.0047566	3.78251
17	42009211	42009211	rs150055076	A	G	0.172531	-0.017475	0.002466	1.43e-12	563934	-0.0227473	0.00280721	5.35438e-16	PAHO	-0.0052723	3.42663
17	42016435	42016435	rs141981916	A	T	0.009981	0.049282	0.009782	4.79e-07	561438	0.0614577	0.0110755	2.87347e-08	PAHO	0.0121757	1.22193
17	42335135	42335135	rs5017	T	C	0.078058	0.024039	0.003484	5.41e-12	562360	0.0244158	0.0039737	8.02909e-10	B3AT	0.0003768	-2.17147
17	42338945	42338945	rs5036	C	T	0.024379	0.066773	0.006248	1.25e-26	562359	0.0750847	0.00703298	1.31705e-26	B3AT	0.0083117	-0.0226922
17	42433874	42433874	rs116854865	T	C	0.009231	0.069992	0.010238	8.41e-12	560503	0.0637192	0.0116279	4.25715e-08	F1712	-0.0062728	-3.70432
17	43413451	43413451	rs1000354	A	G	0.274973	0.017237	0.002079	1.19e-16	560787	0.0130003	0.00231448	1.94378e-08	RHG27	-0.0042367	-8.2131
17	43493101	43493101	rs12947718	A	G	0.187164	0.044672	0.002376	8.08e-79	562361	0.0355064	0.00262306	9.55713e-42	RHG27	-0.0091656	-37.0729
17	43995932	43995932	rs8076152	G	C	0.345492	-0.015153	0.001971	1.55e-14	558837	-0.0166002	0.00225012	1.6134e-13	TAU	-0.0014472	-1.01741
17	44025888	44025888	rs242559	C	A	0.237043	0.045059	0.0022	3.57e-93	560788	0.0350664	0.00241944	1.33026e-47	TAU	-0.0099926	-45.5713
17	44083948	44083948	rs8067056	C	T	0.377657	0.028832	0.001921	7.29e-51	563942	0.02239	0.00212609	6.21349e-26	TAU	-0.006442	-24.9306
17	44822662	44822662	rs199535	G	A	0.214119	0.043365	0.002251	1.28e-82	559847	0.0346122	0.00248906	5.84718e-44	NSF	-0.0087528	-38.6597
17	44889703	44889703	rs3916033	C	T	0.442462	0.019516	0.00189	5.81e-25	562351	0.0193776	0.00212593	7.87456e-20	WNT3	-0.0001384	-5.13205
17	44967722	44967722	rs1105127	C	G	0.365379	-0.022915	0.001946	5.87e-32	563942	-0.0191941	0.00214794	4.03332e-19	WNT9B	0.0037209	-12.837
17	45344662	45344662	rs8073827	T	G	0.295811	0.009315	0.002018	3.97e-06	563943	0.0123502	0.00223578	3.31522e-08	ITB3	0.0030352	2.07828
17	46590565	46590565	rs74454305	G	C	0.046315	0.027071	0.004388	7.09e-10	563943	0.0280655	0.00498769	1.83419e-08	HXB1	0.0009945	-1.4128
17	46668951	46668951	rs872760	G	A	0.171342	-0.020585	0.002451	4.77e-17	563937	-0.0188643	0.00273966	5.7521e-12	HXB3	0.0017207	-5.08131
17	46961493	46961493	rs9909916	T	C	0.252668	-0.010596	0.002121	5.99e-07	563917	-0.0142204	0.00243292	5.06609e-09	AT5G1	-0.0036244	2.07275
17	47422363	47422363	rs11652146	G	A	0.31358	-0.012159	0.001984	9.19e-10	563943	-0.013679	0.0021811	3.57411e-10	ZN652	-0.00152	0.410148
17	54988182	54988182	rs2525992	C	T	0.265239	-0.012317	0.002112	5.59e-09	563943	-0.0132463	0.00231782	1.09709e-08	TRI25	-0.0009293	-0.29283
17	56669751	56669751	rs150454583	G	A	0.05773	0.023878	0.004094	5.61e-09	562539	0.0289434	0.00465583	5.08104e-10	TEX14	0.0050654	1.04301
17	57965169	57965169	rs1292050	C	T	0.196231	-0.029317	0.002324	1.95e-36	563942	-0.029557	0.00257793	1.96849e-30	TBD	-0.00024	-6.0041
17	58492358	58492358	rs77761822	T	A	0.019753	0.043786	0.007625	9.57e-09	452438	0.0490259	0.00853171	9.12123e-09	CQ064	0.0052399	0.0208585
17	59241768	59241768	rs8073611	A	C	0.185197	-0.026662	0.002374	3.16e-29	563939	-0.0280736	0.00270163	2.71381e-25	BCAS3	-0.0014116	-3.93389
17	59450105	59450105	rs11657044	T	C	0.169418	0.03536	0.002473	2.53e-46	563945	0.0330522	0.00273271	1.12212e-33	BCAS3	-0.0023078	-12.6469
17	61812995	61812995	rs6504179	T	G	0.359547	0.017541	0.001933	1.22e-19	562857	0.0210243	0.00216265	2.44044e-22	STRAA	0.0034833	2.69889
17	67082962	67082962	rs740516	G	C	0.152039	-0.019134	0.002586	1.42e-13	563939	-0.0260283	0.00290877	3.61199e-19	ABCA6	-0.0068943	5.59454
17	76126586	76126586	rs379149	T	C	0.117518	0.023083	0.00302	2.23e-14	509178	0.0240133	0.00338701	1.34288e-12	TMC6	0.0009303	-1.77973
17	79377201	79377201	rs11150784	T	A	0.294126	0.012915	0.002165	2.5e-09	508071	0.0136758	0.00241474	1.48328e-08	TM105	0.0007608	-0.773283
17	79915647	79915647	rs35069988	G	A	0.535618	0.009286	0.001969	2.44e-06	502870	0.0161777	0.0022204	3.19378e-13	NOTUM	0.0068917	6.88308
17	81051887	81051887	rs7223467	T	G	0.347934	-0.016544	0.002052	7.95e-16	501425	-0.0171306	0.0023183	1.47632e-13	METRL	-0.0005866	-2.26881
18	43131442	43131442	rs12967734	C	T	0.10494	-0.024591	0.003045	7.05e-16	563942	-0.0227648	0.00338214	1.68621e-11	UT2	0.0018262	-4.37872
18	43772403	43772403	rs9964524	T	C	0.557971	-0.015488	0.001863	9.91e-17	563931	-0.0147304	0.00213118	4.78438e-12	CR025	0.0007576	-4.68375
18	46350865	46350865	rs9962669	A	G	0.109531	0.025772	0.002965	3.76e-18	563000	0.0332482	0.00339649	1.25548e-22	CTIF	0.0074762	4.47638
18	46981035	46981035	rs35755610	T	C	0.176168	0.012961	0.002428	9.55e-08	562502	0.0156811	0.0027755	1.60617e-08	DYM	0.0027201	0.774212
18	55319472	55319472	rs7226404	C	A	0.148334	-0.01986	0.002601	2.36e-14	559203	-0.0169666	0.00289496	4.60819e-09	AT8B1	0.0028934	-5.29062
19	779606	779606	rs117710064	T	C	0.140838	0.024674	0.002827	2.76e-18	501705	0.0241599	0.00319565	4.02309e-14	MISP	-0.0005141	-4.16365
19	817394	817394	rs7259714	C	T	0.608312	-0.028252	0.002006	5.52e-45	503965	-0.033627	0.00225174	1.98693e-50	LPPR3	-0.005375	5.44376
19	2171490	2171490	rs1015670	A	G	0.463448	0.028945	0.001928	6.94e-51	510115	0.0376287	0.00213229	1.07222e-69	DOT1L	0.0086837	18.8111
19	2536679	2536679	rs34181610	T	C	0.378878	0.012297	0.002019	1.17e-09	510117	0.0133323	0.00229042	5.85407e-09	GBG7	0.0010353	-0.699272
19	13990126	13990126	rs10413657	A	G	0.215607	0.012715	0.002353	6.67e-08	508533	0.0159213	0.00260307	9.57296e-10	NANO3	0.0032063	1.84308
19	17826804	17826804	rs10422213	G	A	0.538627	0.009355	0.001895	8.12e-07	563935	0.0138351	0.00215795	1.4435e-10	MAP1S	0.0044801	3.75014
19	32591700	32591700	rs1433122	T	C	0.299459	0.013839	0.002018	7.33e-12	563944	0.0176643	0.0023182	2.53972e-14	ZN507	0.0038253	2.46032
19	33090353	33090353	rs12462871	G	A	0.270881	0.015778	0.002077	3.18e-14	563942	0.0170522	0.00231276	1.66715e-13	ANR27	0.0012742	-0.719548
19	33183291	33183291	rs8108621	A	G	0.163807	0.015632	0.002528	6.51e-10	563938	0.0172163	0.00285946	1.73529e-09	NUD19	0.0015843	-0.425791
19	33337669	33337669	rs149203042	C	A	0.151504	-0.023686	0.002573	3.57e-20	563940	-0.0263048	0.00295418	5.37422e-19	BAT1	-0.0026188	-1.17765
19	33890838	33890838	rs10406327	G	C	0.476454	-0.012324	0.00188	5.69e-11	562990	-0.0287284	0.00214539	6.84652e-41	PEPD	-0.0164044	29.9196
19	33915771	33915771	rs59043989	T	C	0.093801	-0.021341	0.003214	3.23e-11	563942	-0.02754	0.00366199	5.45738e-14	PEPD	-0.006199	2.77222
19	35556640	35556640	rs1688031	T	C	0.144874	0.01243	0.002689	3.85e-06	561920	0.0170142	0.00302364	1.83305e-08	HEPS	0.0045842	2.32229
19	35947890	35947890	rs2871993	A	G	0.288951	-0.016248	0.002053	2.65e-15	561397	-0.0173171	0.00234734	1.61503e-13	FFAR2	-0.0010691	-1.78493
19	41104860	41104860	rs1864074	G	T	0.615666	-0.015105	0.0019	1.98e-15	562356	-0.0136223	0.00210802	1.03253e-10	LTBP4	0.0014827	-4.71724
19	41109927	41109927	rs183265736	G	A	0.002515	-0.153697	0.021856	2.11e-12	548421	-0.164269	0.0252749	8.06919e-11	LTBP4	-0.010572	-1.58255
19	41147697	41147697	rs2561566	C	T	0.122642	0.027547	0.002864	7.05e-22	562855	0.0306484	0.00325481	4.67137e-21	LTBP4	0.0031014	-0.821255
19	41157448	41157448	rs188816928	A	G	0.013259	0.070058	0.008653	5.93e-16	561209	0.0715763	0.00981579	3.05478e-13	NUMBL	0.0015183	-2.71193
19	41266479	41266479	rs11665867	G	A	0.163449	-0.018404	0.002508	2.25e-13	560783	-0.0220231	0.00276319	1.58476e-15	SNRPA	-0.0036191	2.15222
19	41489506	41489506	rs73037222	C	T	0.010069	0.054543	0.009333	5.24e-09	563301	0.0661517	0.0106991	6.29222e-10	CP2B6	0.0116087	0.920527
19	47066644	47066644	rs8105727	A	G	0.201518	0.011521	0.002306	5.99e-07	559846	0.0154484	0.00256237	1.65024e-09	PP5D1	0.0039274	2.55988
19	49206462	49206462	rs681343	T	C	0.500816	-0.013545	0.001847	2.33e-13	562362	-0.0196115	0.00206234	1.91898e-21	FUT2	-0.0060665	8.08429
19	50095961	50095961	rs11878568	C	T	0.23703	0.026267	0.002225	3.89e-32	563941	0.0229242	0.00249264	3.68924e-20	PRR12	-0.0033428	-11.977
20	3299054	3299054	rs6139071	C	T	0.233011	0.014553	0.002216	5.28e-11	544431	0.013347	0.00243352	4.14295e-08	CT194	-0.001206	-2.89468
20	10612963	10612963	rs1232603	T	C	0.325486	-0.013283	0.001977	1.91e-11	563944	-0.0176947	0.00220046	8.88472e-16	SLX4I	-0.0044117	4.33239
20	18456635	18456635	rs2424211	A	G	0.109293	0.01873	0.002958	2.48e-10	563940	0.0228982	0.00328109	2.976e-12	RPC6	0.0041682	1.92082
20	25640732	25640732	rs6115241	G	C	0.228431	-0.014986	0.002208	1.18e-11	559846	-0.0156058	0.0024518	1.95257e-10	ZN337	-0.0006198	-1.21872
20	44728661	44728661	rs6131012	G	A	0.395919	0.01072	0.0019	1.71e-08	562996	0.0140959	0.00210789	2.27496e-11	NCOA5	0.0033759	2.87602
20	49062284	49062284	rs6095951	A	G	0.389715	0.011421	0.001895	1.73e-09	563943	0.0156938	0.00215778	3.51173e-13	PTN1	0.0042728	3.69252
20	49091940	49091940	rs6126015	C	T	0.486344	0.02118	0.001854	3.43e-30	561852	0.0233495	0.00212368	4.04533e-28	PTN1	0.0021695	-2.07166
20	55918934	55918934	rs28368105	G	T	0.005773	0.085002	0.012972	5.84e-11	559143	0.0818929	0.0147737	2.97057e-08	SPO11	-0.0031091	-2.70643
20	57227723	57227723	rs218471	G	C	0.277091	0.011193	0.002125	1.41e-07	563940	0.0134671	0.00240764	2.22596e-08	STX16	0.0022741	0.801702
20	60943183	60943183	rs74401548	G	C	0.045645	-0.027585	0.004718	5.13e-09	508714	-0.036547	0.00532214	6.55783e-12	LAMA5	-0.008962	2.89336
20	61038214	61038214	rs6061241	T	C	0.070718	-0.03241	0.003797	1.48e-17	510123	-0.0375447	0.00421318	5.04562e-19	GATA5	-0.0051347	1.46735
20	62475603	62475603	rs2427538	C	T	0.392788	0.012331	0.001983	5.16e-10	508091	0.015055	0.00223229	1.53874e-11	ZBT46	0.002724	1.52548
21	16460759	16460759	rs2823045	A	G	0.257035	-0.015594	0.002116	1.79e-13	562361	-0.013182	0.00234633	1.93028e-08	NRIP1	0.002412	-5.03277
21	16576783	16576783	rs2823139	A	G	0.336755	-0.030806	0.001968	3.4e-55	559203	-0.027945	0.0021927	3.34311e-37	NRIP1	0.002861	-17.9927
21	16791374	16791374	rs2242825	T	C	0.299988	-0.026205	0.002018	1.67e-38	559841	-0.0240689	0.00223589	5.04608e-27	UBP25	0.0021361	-11.4802
21	30749793	30749793	rs2832302	G	T	0.404077	-0.011345	0.00189	1.99e-09	560781	-0.0163417	0.00209938	7.02217e-15	BACH1	-0.0049967	5.45238
21	35293199	35293199	rs12482697	G	T	0.096587	0.029143	0.003127	1.23e-20	562353	0.0261801	0.00347891	5.25679e-14	ATPO	-0.0029629	-6.63082
21	38066751	38066751	rs2835442	G	A	0.275541	-0.028115	0.002083	1.86e-41	562999	-0.0287331	0.00237229	9.13027e-34	SIM2	-0.0006181	-7.69097
21	39858210	39858210	rs11700443	A	G	0.187622	0.015637	0.002377	4.93e-11	559843	0.0156033	0.00264968	3.89097e-09	ERG	-3.37e-05	-1.89721
21	44140635	44140635	rs4920140	C	T	0.394669	0.013542	0.001888	7.57e-13	563941	0.0162653	0.00209765	8.89879e-15	PDE9A	0.0027233	1.92976
22	21932068	21932068	rs181362	T	C	0.202203	-0.014203	0.002353	1.62e-09	563303	-0.0171995	0.00257816	2.53701e-11	UB2L3	-0.0029965	1.80519
22	28554373	28554373	rs4820782	T	C	0.319701	-0.011401	0.00198	8.67e-09	563945	-0.0122623	0.00222959	3.80246e-08	TTC28	-0.0008613	-0.642046
22	28603212	28603212	rs5762520	G	A	0.446367	0.011395	0.001925	3.34e-09	558861	0.014288	0.00212957	1.95519e-11	TTC28	0.002893	2.23256
22	29123846	29123846	rs5762760	T	A	0.381428	0.015307	0.001898	7.82e-16	563944	0.0173731	0.00210616	1.60124e-16	CHK2	0.0020661	0.68875
22	30138232	30138232	rs1548684	A	G	0.093166	0.027535	0.003183	5.44e-18	563942	0.0341195	0.00355335	7.8354e-22	ZMAT5	0.0065845	3.84154
22	30326102	30326102	rs7291756	G	A	0.250238	-0.01987	0.002125	9.13e-21	563005	-0.0228328	0.00235413	3.04422e-22	MTMR3	-0.0029628	1.47699
22	30654000	30654000	rs9620962	A	G	0.095239	0.018043	0.003231	2.39e-08	562858	0.02156	0.00370492	5.90965e-09	ONCM	0.003517	0.606836
22	30770603	30770603	rs5749082	T	A	0.285069	0.015041	0.002047	2.11e-13	562856	0.0196583	0.00228696	8.26765e-18	CC157	0.0046173	4.4069
22	30860830	30860830	rs2269961	T	C	0.208162	0.012534	0.002287	4.32e-08	562361	0.0173247	0.00254598	1.01239e-11	S14L3	0.0047907	3.63014
22	30960412	30960412	rs42931	C	T	0.393239	0.011014	0.001926	1.11e-08	562362	0.0167006	0.00218386	2.05281e-14	G3ST1	0.0056866	5.73297
22	36539804	36539804	rs80576	A	G	0.165894	0.016106	0.002478	8.32e-11	562860	0.0210377	0.00278964	4.65093e-14	APOL3	0.0049317	3.25258
22	37368251	37368251	rs2858234	C	T	0.280753	-0.026248	0.00205	1.74e-37	563940	-0.0269724	0.00228954	4.90754e-32	TEX33	-0.0007244	-5.45031
22	37388535	37388535	rs143580760	A	T	0.013942	0.054896	0.00823	2.65e-11	563936	0.063236	0.00937527	1.53042e-11	TEX33	0.00834	0.238435
22	37408847	37408847	rs143866791	A	G	0.020771	-0.058932	0.006697	1.45e-18	563939	-0.0658244	0.00755084	2.84421e-18	THTR	-0.0068924	-0.292594
22	37433119	37433119	rs138497248	T	C	0.010863	-0.063174	0.00963	5.57e-11	562088	-0.0647909	0.0110333	4.29813e-09	THTM	-0.0016169	-1.88742
22	37446134	37446134	rs141452749	G	C	0.022975	0.051474	0.006351	5.55e-16	563933	0.0511323	0.00723099	1.53525e-12	KCD17	-0.0003417	-3.44189
22	37450395	37450395	rs117835696	A	G	0.020715	-0.070095	0.006823	9.92e-25	563944	-0.0635185	0.00776894	2.93544e-16	KCD17	0.0065765	-8.47116
22	37455874	37455874	rs78029853	C	T	0.019659	0.065366	0.006849	1.46e-21	563003	0.0628824	0.00781923	8.83622e-16	KCD17	-0.0024836	-5.78191
22	37470041	37470041	rs2076085	C	A	0.461226	-0.095171	0.001882	0	562856	-0.0959633	0.00214706	0	TMPS6	-0.0007923	0
22	37471508	37471508	rs112316746	T	C	0.027053	0.077068	0.005751	6.5e-41	563945	0.0766591	0.00658598	2.5881e-31	TMPS6	-0.0004089	-9.60007
22	37471803	37471803	rs143653776	G	A	0.010094	-0.079937	0.009625	1.05e-16	563034	-0.078941	0.0109434	5.44952e-13	TMPS6	0.000996	-3.71517
22	37480155	37480155	rs2543521	T	C	0.210977	-0.056548	0.002309	2.08e-132	562855	-0.0592008	0.0026189	3.84813e-113	TMPS6	-0.0026528	-19.2672
22	37498311	37498311	rs80140288	A	G	0.011652	0.052687	0.009031	5.56e-09	563945	0.0606481	0.0103318	4.35606e-09	TMPS6	0.0079611	0.105981
22	37513761	37513761	rs80210934	A	G	0.048599	0.049252	0.00452	1.29e-27	562086	0.054386	0.0051552	5.0946e-26	IL2RB	0.005134	-1.59652
22	37514178	37514178	rs117442245	A	G	0.015508	-0.048437	0.007855	7.2e-10	562089	-0.0551878	0.00897563	7.81583e-10	IL2RB	-0.0067508	-0.0356426
22	37520172	37520172	rs5756527	G	T	0.519433	-0.022304	0.001886	3.15e-32	563942	-0.0234416	0.00215041	1.14014e-27	IL2RB	-0.0011376	-4.55865
22	39531085	39531085	rs139387	G	A	0.403373	0.014449	0.001899	2.89e-14	563945	0.0137932	0.00210716	5.91435e-11	CBX7	-0.0006558	-3.31101
22	44324730	44324730	rs738408	T	C	0.217406	0.03264	0.002257	2.31e-47	563001	0.0278468	0.00252017	2.20319e-28	PLPL3	-0.0047932	-18.9794
22	46364161	46364161	rs9330813	A	G	0.315435	0.031383	0.00212	1.52e-49	493094	0.0320382	0.00237604	1.94595e-41	WNT7B	0.0006552	-8.10729
Shared loci after adjustment
CHR	POS	POS	SNP	A1	A2	freq	b	se	p	N	bC	bC_se	bC_pval	NearestGene	dBeta	dP
1	3104972	3104972	rs116525159	A	G	0.05521	0.025199	0.004223	2.49e-09	510120	0.0260938	0.00476476	4.34041e-08	PRD16	0.0008948	-1.24133
1	3311261	3311261	rs6702992	C	T	0.369215	0.014175	0.00203	2.98e-12	492829	0.0162087	0.00227226	9.80138e-13	PRD16	0.0020337	0.482929
1	3332212	3332212	rs111652194	T	C	0.03323	0.037757	0.005714	4.03e-11	510122	0.043064	0.006442	2.31116e-11	PRD16	0.005307	0.241475
1	3691528	3691528	rs1175550	G	A	0.232052	0.030902	0.002316	1.41e-40	508079	0.0322461	0.00254573	9.04123e-37	SMIM1	0.0013441	-3.80701
1	3743391	3743391	rs6688969	T	C	0.312501	0.020648	0.002014	1.25e-24	544431	0.02182	0.00223242	1.45401e-22	CE104	0.001172	-2.06566
1	10357806	10357806	rs112682076	C	G	0.010255	-0.069581	0.009449	1.86e-13	561436	-0.0762886	0.0107673	1.38818e-12	KIF1B	-0.0067076	-0.872933
1	12657974	12657974	rs115997464	A	C	0.026751	-0.03847	0.005854	5.15e-11	562860	-0.0443015	0.00667207	3.1402e-11	DHRS3	-0.0058315	0.21485
1	12660420	12660420	rs55728759	C	T	0.355143	0.01526	0.001964	8.23e-15	562855	0.014158	0.00224427	2.81714e-10	DHRS3	-0.001102	-4.53441
1	16368977	16368977	rs2007471	T	C	0.366123	0.021546	0.002007	7.65e-27	505374	0.0201315	0.00222636	1.53353e-19	CLCKB	-0.0014145	-7.30203
1	22702231	22702231	rs12568930	C	T	0.175758	0.023386	0.002435	8.09e-22	547594	0.0216605	0.00269974	1.03054e-15	ZBT40	-0.0017255	-6.10512
1	25044111	25044111	rs4601530	T	C	0.256174	0.017885	0.002134	5.58e-17	559203	0.0170232	0.00233713	3.24522e-13	CLIC4	-0.0008618	-3.76461
1	29486128	29486128	rs113292219	T	C	0.051581	0.031421	0.004188	6.49e-14	563940	0.0415183	0.00476309	2.86508e-18	SRSF4	0.0100973	4.35511
1	40418630	40418630	rs7515857	T	G	0.257328	-0.01903	0.002113	2.28e-19	563001	-0.0209924	0.00234374	3.34246e-19	MFS2A	-0.0019624	-0.166131
1	48030350	48030350	rs11583750	A	G	0.095109	-0.030257	0.003158	1.03e-21	563001	-0.0308766	0.0035319	2.28603e-18	FOXD2	-0.0006196	-3.34624
1	88641063	88641063	rs6428637	A	G	0.57848	-0.01311	0.00186	1.87e-12	562361	-0.0143504	0.00207352	4.49065e-12	PKN2	-0.0012404	-0.380468
1	120257576	120257576	rs477992	A	G	0.319769	-0.014601	0.001971	1.35e-13	559848	-0.0149452	0.00219529	9.90699e-12	SERA	-0.0003442	-1.86561
1	155093567	155093567	rs80204403	G	C	0.030905	0.03711	0.005443	9.6e-12	563936	0.0362788	0.00618534	4.48376e-09	EFNA1	-0.0008312	-2.66937
1	155178782	155178782	rs760077	A	T	0.398492	-0.030901	0.001906	4.76e-59	562851	-0.0262103	0.00216719	1.13407e-33	MTX1	0.0046907	-25.377
1	155261709	155261709	rs116100695	A	G	0.002739	-0.17145	0.018988	1.83e-19	486353	-0.177037	0.0212521	8.0617e-17	KPYR	-0.005587	-2.64398
1	155509562	155509562	rs113129002	C	T	0.067924	-0.023706	0.00374	2.41e-10	563939	-0.0295301	0.00427372	4.85692e-12	ASH1L	-0.0058241	1.69566
1	155824181	155824181	rs55785064	C	T	0.148417	-0.024841	0.002697	3.44e-20	561447	-0.0191893	0.003058	3.49358e-10	GON4L	0.0056517	-10.0067
1	161515326	161515326	rs55971447	T	C	0.118261	0.031085	0.002863	2.01e-27	562858	0.0314304	0.00328258	1.01939e-21	FCG3A	0.0003454	-5.70514
1	163739717	163739717	rs4442348	A	G	0.506143	0.011238	0.00185	1.29e-09	563945	0.0175097	0.00206492	2.25945e-17	NUF2	0.0062717	7.75659
1	200033769	200033769	rs2821388	G	A	0.267594	0.014734	0.002076	1.34e-12	563004	0.0221431	0.0023119	9.905e-22	NR5A2	0.0074091	9.13125
1	201109377	201109377	rs10920128	T	C	0.306902	0.011377	0.002014	1.65e-08	563002	0.012894	0.00223231	7.6462e-09	TMEM9	0.001517	0.334038
1	213037624	213037624	rs963327	C	A	0.251231	-0.018333	0.002118	5.17e-18	561277	-0.0175395	0.00234817	8.05323e-14	FLVC1	0.0007935	-4.19248
1	213974734	213974734	rs17709142	C	T	0.094003	0.029705	0.003277	1.32e-19	558120	0.0307712	0.00366052	4.23319e-17	PROX1	0.0010662	-2.50609
1	214180721	214180721	rs3767844	G	A	0.28638	0.034623	0.002051	7.28e-64	558763	0.040066	0.00226455	4.77045e-70	PROX1	0.005443	6.18357
1	217016310	217016310	rs11117693	T	A	0.199711	0.017847	0.002297	8.27e-15	563943	0.016743	0.00255451	5.59059e-11	ERR3	-0.001104	-3.82995
1	217436181	217436181	rs1466	T	C	0.148922	0.027015	0.002573	9.32e-26	563944	0.0267386	0.00287086	1.23329e-20	ERR3	-0.0002764	-5.12165
1	231562228	231562228	rs61835223	G	A	0.02027	0.115511	0.00664	1e-67	563945	0.105175	0.00761603	2.22834e-43	EGLN1	-0.010336	-24.348
1	248039451	248039451	rs3811444	T	C	0.336218	0.022497	0.001943	5.72e-31	561276	0.0236358	0.00217122	1.34513e-27	OR2W3	0.0011388	-3.37137
2	12893977	12893977	rs2059427	T	C	0.371788	0.016322	0.001916	1.72e-17	559846	0.0137393	0.00212188	9.47753e-11	TRIB2	-0.0025827	-6.74117
2	20819786	20819786	rs62125677	T	C	0.057173	-0.024626	0.004015	8.86e-10	559843	-0.0268328	0.00456119	4.03292e-09	H1BP3	-0.0022068	-0.658186
2	27730940	27730940	rs1260326	T	C	0.398784	-0.016203	0.00187	4.84e-18	562359	-0.0196187	0.00205653	1.43224e-21	GCKR	-0.0034157	3.52883
2	30491392	30491392	rs17009315	G	A	0.23023	-0.014124	0.002176	8.91e-11	563938	-0.0165005	0.0024242	9.99459e-12	LBH	-0.0023765	0.950113
2	42282829	42282829	rs11902166	A	C	0.219353	0.01608	0.002236	6.66e-13	560785	0.0186305	0.00255766	3.23638e-13	PKDCC	0.0025505	0.313415
2	44014301	44014301	rs3765000	G	A	0.074396	0.028027	0.003508	1.43e-15	563944	0.032779	0.00388584	3.2978e-17	DC2L1	0.004752	1.63711
2	46179662	46179662	rs12471357	T	C	0.42123	0.014276	0.001879	3.16e-14	559701	0.0165166	0.00208988	2.72017e-15	KPCE	0.0022406	1.06509
2	46193347	46193347	rs6706140	C	T	0.430906	-0.016766	0.001882	5.41e-19	558119	-0.0183853	0.00206703	5.86574e-19	KPCE	-0.0016193	-0.0351255
2	46227831	46227831	rs75357782	A	G	0.013577	-0.049221	0.008307	3.21e-09	527655	-0.051698	0.00946849	4.76124e-08	KPCE	-0.002477	-1.17122
2	46293826	46293826	rs114948639	T	C	0.011824	-0.119079	0.008749	3.81e-42	563301	-0.115424	0.0099813	6.2733e-31	KPCE	0.003655	-11.2166
2	46299113	46299113	rs7598174	T	C	0.192559	-0.042703	0.002365	8.29e-73	559843	-0.0424954	0.00263936	2.52396e-58	KPCE	0.0002076	-14.4835
2	46325187	46325187	rs58166457	C	T	0.020574	-0.089575	0.006547	1.45e-42	563946	-0.094259	0.00750992	3.91266e-36	KPCE	-0.004684	-6.4311
2	46339601	46339601	rs114176190	G	A	0.065047	0.039523	0.003826	5.45e-25	563765	0.040694	0.00437429	1.36544e-20	KPCE	0.001171	-4.39888
2	46350501	46350501	rs17737489	C	T	0.037033	0.033158	0.004885	1.18e-11	562987	0.0329889	0.00543835	1.31156e-09	KPCE	-0.0001691	-2.04591
2	46356950	46356950	rs75318255	A	G	0.027758	0.059908	0.005772	3.3e-25	563945	0.0642459	0.0066035	2.26662e-22	KPCE	0.0043379	-2.83686
2	46360907	46360907	rs10168349	C	G	0.335571	-0.072482	0.001947	2.53e-303	563297	-0.0733087	0.00217465	4.05087e-249	KPCE	-0.0008267	-54.2044
2	46374721	46374721	rs148158767	T	C	0.023432	-0.088583	0.00614	3.92e-47	562582	-0.0973735	0.00702583	1.11676e-43	KPCE	-0.0087905	-3.45467
2	46383523	46383523	rs115257641	T	C	0.020218	0.063873	0.00661	4.59e-22	563945	0.0682838	0.00756241	1.72664e-19	KPCE	0.0044108	-2.57539
2	46403889	46403889	rs281471	A	T	0.062999	0.026068	0.003805	7.57e-12	560788	0.0256208	0.0042201	1.27017e-09	KPCE	-0.0004472	-2.22477
2	46406164	46406164	rs149395193	A	C	0.009139	-0.090695	0.010063	2.13e-19	562390	-0.0830806	0.0115679	6.87093e-13	KPCE	0.0076144	-6.50864
2	46438085	46438085	rs149607617	A	T	0.036224	0.044257	0.005019	1.24e-18	563946	0.0453234	0.00577373	4.16287e-15	KPCE	0.0010664	-3.52597
2	46443932	46443932	rs72793686	A	C	0.021719	-0.051468	0.006432	1.29e-15	563946	-0.0535686	0.00732734	2.65586e-13	KPCE	-0.0021006	-2.31362
2	46467257	46467257	rs76616743	A	G	0.03461	-0.057223	0.005082	2.22e-29	563946	-0.0607725	0.00582607	1.78748e-25	KPCE	-0.0035495	-3.90589
2	46554533	46554533	rs11125071	C	G	0.549304	-0.01614	0.001861	4.44e-18	562857	-0.0157954	0.00207438	2.64672e-14	EPAS1	0.0003446	-3.77533
2	47030363	47030363	rs17773190	G	A	0.47677	0.020801	0.001862	6.08e-29	563003	0.0172498	0.00207524	9.3928e-17	SOCS5	-0.0035512	-12.1889
2	69813458	69813458	rs12987661	C	T	0.123421	0.020388	0.002801	3.53e-13	559203	0.0193182	0.00311957	5.91931e-10	AAK1	-0.0010698	-3.2245
2	120848049	120848049	rs28930677	T	C	0.045953	0.042509	0.004433	9.5e-22	559201	0.0381298	0.00505407	4.54424e-14	E41L5	-0.0043792	-7.67974
2	145695907	145695907	rs1371044	A	G	0.234155	0.026924	0.00218	5.4e-35	559846	0.0277871	0.00240206	5.98166e-31	ZEB2	0.0008631	-4.04443
2	176974104	176974104	rs863678	G	T	0.357371	-0.023868	0.00199	4.02e-33	558116	-0.0269365	0.00226604	1.38224e-32	HXD10	-0.0030685	-0.536357
2	176996023	176996023	rs4972804	T	C	0.591772	0.014498	0.002067	2.43e-12	559809	0.0167737	0.00230403	3.33457e-13	HXD8	0.0022757	0.862566
2	177005757	177005757	rs1348807	C	T	0.300433	-0.016887	0.002022	7.09e-17	559205	-0.0191288	0.00226555	3.08439e-17	HXD3	-0.0022418	0.361477
2	208003579	208003579	rs768090	A	T	0.319564	0.019066	0.001986	8.55e-22	559846	0.0175831	0.00220822	1.68472e-15	KLF7	-0.0014829	-6.29456
3	12635706	12635706	rs1532533	A	G	0.441472	0.014924	0.001859	1.04e-15	558116	0.022885	0.00207266	2.41288e-28	RAF1	0.007961	12.6345
3	13726840	13726840	rs6781368	G	A	0.4523	0.012195	0.001857	5.37e-11	560785	0.0115052	0.00207094	2.76696e-08	FBLN2	-0.0006898	-2.71203
3	30199216	30199216	rs12635066	A	G	0.340726	0.013468	0.001999	1.68e-11	562778	0.0130548	0.00227343	9.33774e-09	RBMS3	-0.0004132	-2.74493
3	36312234	36312234	rs7647352	G	A	0.602971	-0.011581	0.001883	8.01e-10	562360	-0.0118893	0.00209333	1.3502e-08	STAC	-0.0003083	-1.22677
3	46979013	46979013	rs4683294	G	C	0.32561	0.012453	0.002069	1.82e-09	559702	0.021	0.00228023	3.27366e-20	CCD12	0.008547	10.745
3	56771251	56771251	rs3772219	C	A	0.32169	-0.027079	0.001965	3.49e-43	562360	-0.0294217	0.0021645	4.41804e-42	ARHG3	-0.0023427	-1.1024
3	58410554	58410554	rs34579268	T	C	0.372458	-0.020054	0.001899	4.79e-26	562361	-0.0181211	0.00216113	5.07277e-17	PXK	0.0019329	-9.02491
3	72396329	72396329	rs11708187	A	G	0.23909	0.015748	0.002161	3.29e-13	563925	0.0166814	0.00246629	1.34463e-11	RYBP	0.0009334	-1.61141
3	125987924	125987924	rs9825772	G	A	0.592087	-0.014192	0.001924	1.69e-13	562359	-0.012434	0.0021287	5.18435e-09	AL1L1	0.001758	-4.48681
3	156340312	156340312	rs9814533	C	A	0.235029	0.013223	0.0022	1.92e-09	563945	0.0157352	0.00249888	3.03653e-10	PARPT	0.0025122	0.800924
3	172294500	172294500	rs79287178	A	G	0.031245	-0.04455	0.005528	8.13e-16	563945	-0.0444831	0.00634214	2.31771e-12	TNF10	6.69e-05	-3.45497
3	187632238	187632238	rs9810106	C	G	0.464674	0.01254	0.001847	1.15e-11	563004	0.0164343	0.00206234	1.60274e-15	BCL6	0.0038943	3.85583
3	195628001	195628001	rs4927790	T	G	0.246568	0.013586	0.002175	4.34e-10	563940	0.0148983	0.00247802	1.83048e-09	ACK1	0.0013123	-0.625075
3	195650428	195650428	rs73208017	G	C	0.138209	-0.020738	0.00274	3.99e-14	563942	-0.019289	0.00312237	6.50427e-10	ACK1	0.001449	-4.21223
3	195813757	195813757	rs58365266	T	C	0.215266	0.017752	0.002244	2.69e-15	563945	0.0175113	0.00256435	8.56464e-12	TFR1	-0.0002407	-3.50296
3	196178824	196178824	rs7372951	A	G	0.237896	-0.01297	0.002175	2.54e-09	562855	-0.0146208	0.00242334	1.60626e-09	RN168	-0.0016508	0.199018
4	55385147	55385147	rs140186102	A	G	0.019153	-0.039254	0.006851	1.03e-08	563931	-0.0440464	0.0078209	1.7825e-08	KIT	-0.0047924	-0.238192
4	55408875	55408875	rs218264	T	A	0.250824	-0.041517	0.002145	2.28e-83	563944	-0.0423799	0.00239756	6.3905e-70	KIT	-0.0008629	-13.4476
4	81157098	81157098	rs6848130	C	T	0.280489	0.013496	0.002056	5.37e-11	563002	0.014149	0.00229469	7.00582e-10	FGF5	0.000653	-1.11548
4	81174592	81174592	rs13125101	A	G	0.293239	0.023799	0.002021	5.52e-32	563004	0.0247619	0.00232069	1.40557e-26	FGF5	0.0009629	-5.40591
4	95916919	95916919	rs716191	T	G	0.380175	-0.012009	0.001899	2.64e-10	563943	-0.0130785	0.00216113	1.43322e-09	BMR1B	-0.0010695	-0.734709
4	103188709	103188709	rs13107325	T	C	0.074272	0.04586	0.003523	1.06e-38	562363	0.0641422	0.00392501	4.96693e-60	S39A8	0.0182822	21.3292
4	148975635	148975635	rs6827412	G	A	0.391829	0.016149	0.001894	1.58e-17	562859	0.0166671	0.00215694	1.09909e-14	RHG10	0.0005181	-2.84238
5	1059714	1059714	rs117617134	T	C	0.012746	-0.053382	0.008755	1.11e-09	493128	-0.058378	0.00981993	2.76713e-09	S12A7	-0.004996	-0.396707
5	1113244	1113244	rs4580814	T	G	0.590884	-0.014682	0.00198	1.26e-13	507454	-0.0119603	0.00215339	2.78954e-08	S12A7	0.0027217	-5.34516
5	4031987	4031987	rs11750208	T	C	0.299404	-0.011841	0.002035	6.06e-09	547594	-0.0172859	0.00225053	1.58065e-14	IRX1	-0.0054449	5.58364
5	34661070	34661070	rs463036	C	G	0.537829	-0.016123	0.001848	2.83e-18	563942	-0.016811	0.00211868	2.11085e-15	RAI14	-0.000688	-2.87267
5	55794652	55794652	rs7702087	T	C	0.068644	-0.024686	0.003672	1.83e-11	563941	-0.0341632	0.00413274	1.3796e-16	ANR55	-0.0094772	5.1227
5	55806751	55806751	rs459193	A	G	0.254164	-0.018753	0.002109	6.43e-19	563303	-0.0350189	0.00231519	1.09659e-51	ANR55	-0.0162659	32.7682
5	72144005	72144005	rs34651	C	T	0.080341	-0.037673	0.003422	3.77e-28	563944	-0.0399163	0.00381152	1.15503e-25	TNPO1	-0.0022433	-2.48625
5	76476692	76476692	rs2928168	T	G	0.13955	0.024797	0.002679	2.23e-20	562529	0.0283101	0.00301513	6.03845e-21	PDE8B	0.0035131	0.567379
5	137000719	137000719	rs2905582	C	T	0.190156	0.016914	0.002359	7.83e-13	563943	0.0182236	0.00263421	4.5791e-12	KLHL3	0.0013096	-0.767018
5	137581901	137581901	rs10479180	T	C	0.386099	0.010877	0.001899	1.05e-08	562856	0.0127731	0.00210716	1.34632e-09	GFRA3	0.0018961	0.892041
5	142623471	142623471	rs258753	T	C	0.319452	-0.014204	0.001992	1.05e-12	558117	-0.0134441	0.0022134	1.24776e-09	RHG26	0.0007599	-3.07494
5	172675053	172675053	rs62378333	G	C	0.204052	-0.013409	0.002357	1.31e-08	563944	-0.0163045	0.00268749	1.30461e-09	NKX25	-0.0028955	1.00179
6	16203927	16203927	rs79605690	G	A	0.057648	-0.024799	0.004016	6.82e-10	563946	-0.0256262	0.00459048	2.37139e-08	GMPR1	-0.0008272	-1.54122
6	22059967	22059967	rs1207782	T	C	0.615278	0.014996	0.001901	3.18e-15	561276	0.0148251	0.00210876	2.06188e-12	PRL	-0.0001709	-2.81184
6	22125157	22125157	rs9368402	C	T	0.544163	-0.017656	0.00185	1.49e-21	560786	-0.0176565	0.00206492	1.2234e-17	PRL	-5e-07	-3.91438
6	24397110	24397110	rs12192883	G	T	0.275985	0.0153	0.002172	1.95e-12	563004	0.0136798	0.0024755	3.27488e-08	MRS2	-0.0016202	-4.22516
6	25722968	25722968	rs12190171	C	T	0.043521	-0.03314	0.004622	7.81e-13	563003	-0.0311798	0.00510758	1.03054e-09	H2A1A	0.0019602	-3.12041
6	26044774	26044774	rs111706643	A	G	0.030543	-0.041036	0.005462	6.03e-14	563944	-0.0383113	0.00622946	7.74722e-10	H31	0.0027247	-4.10883
6	26501828	26501828	rs41311633	T	C	0.010373	-0.071585	0.011848	1.57e-09	550207	-0.082989	0.0137531	1.5977e-09	BT1A1	-0.011404	-0.00759558
6	26826557	26826557	rs143065886	A	G	0.009476	-0.070216	0.009652	3.61e-13	561852	-0.0781138	0.0106459	2.17745e-13	ZN322	-0.0078978	0.219559
6	26942027	26942027	rs9393777	C	T	0.145697	-0.051008	0.002601	1.48e-85	563942	-0.0418373	0.00286933	3.71968e-48	H2B1J	0.0091707	-37.4002
6	27091383	27091383	rs75040706	G	A	0.029925	0.088924	0.005435	4.11e-60	563945	0.0864371	0.00617843	1.79046e-44	H2B1J	-0.0024869	-15.6391
6	27157050	27157050	rs74931492	T	C	0.03385	0.039198	0.005099	1.57e-14	562509	0.0391942	0.00584023	1.93188e-11	H2A1H	-3.8e-06	-3.09008
6	27160218	27160218	rs115999750	A	G	0.035056	-0.042273	0.005065	7.38e-17	562082	-0.0499225	0.00575445	4.11925e-18	H2A1H	-0.0076495	1.25324
6	27173078	27173078	rs858982	C	T	0.19475	-0.015128	0.002332	9.03e-11	562860	-0.018991	0.0026382	6.08894e-13	TSSP	-0.003863	2.17115
6	27192107	27192107	rs150197496	A	T	0.018078	0.058079	0.007348	2.82e-15	563938	0.0635569	0.00849664	7.41876e-14	TSSP	0.0054779	-1.42008
6	27586230	27586230	rs13217599	C	T	0.084128	0.095467	0.003395	6.78e-174	563943	0.0935022	0.00376228	2.42982e-136	ZN184	-0.0019648	-37.5543
6	27689939	27689939	rs2056923	C	T	0.175138	-0.03154	0.002417	7.27e-39	562362	-0.0238526	0.00268417	6.31267e-19	H2B1L	0.0076874	-19.9387
6	27700191	27700191	rs147006490	C	T	0.023231	0.042781	0.006537	6.2e-11	563899	0.0458467	0.00753056	1.14268e-09	H2B1L	0.0030657	-1.26553
6	27818093	27818093	rs77377107	G	C	0.033193	-0.040432	0.005421	9.12e-14	561920	-0.0519414	0.00622429	7.12385e-17	H2B1N	-0.0115094	3.10728
6	28422921	28422921	rs78359265	A	G	0.034214	0.083061	0.00509	8.06e-60	563944	0.0772658	0.00580378	1.94484e-40	ZSC23	-0.0057952	-19.3825
6	28451829	28451829	rs76696782	T	C	0.057451	-0.027338	0.004007	9.26e-12	561219	-0.0320618	0.00455446	1.92739e-12	GPX6	-0.0047238	0.681641
6	28575928	28575928	rs7381750	G	C	0.08125	-0.020948	0.003375	5.58e-10	563945	-0.0293609	0.00385389	2.5661e-14	SCND3	-0.0084129	4.33736
6	29107198	29107198	rs114685781	G	A	0.018472	0.043962	0.006914	2.1e-10	557481	0.0470265	0.00787368	2.33474e-09	OR2J3	0.0030645	-1.04602
6	29557642	29557642	rs115503606	A	C	0.044724	-0.034661	0.004647	9.11e-14	558844	-0.041275	0.00531898	8.49621e-15	GABR1	-0.006614	1.03029
6	29919003	29919003	rs146202145	T	C	0.019173	0.077393	0.008719	7.29e-19	528436	0.071937	0.00976233	1.72125e-13	1A03	-0.005456	-5.37312
6	30033448	30033448	rs115056485	C	T	0.031826	0.039754	0.00546	3.45e-13	558843	0.0376834	0.00617175	1.02295e-09	RPA12	-0.0020706	-3.47204
6	30335350	30335350	rs2057726	C	T	0.138149	0.047778	0.002673	2.22e-71	557261	0.0495338	0.00298317	6.47616e-62	RPP21	0.0017558	-9.46496
6	31407331	31407331	rs2516470	G	C	0.334399	0.037113	0.001944	3.21e-81	562858	0.038903	0.00217208	9.76375e-72	MICB	0.00179	-9.48311
6	32462127	32462127	rs189745093	C	T	0.309191	-0.0329	0.002811	1.33e-31	407739	-0.0353081	0.00310255	5.23758e-30	DRB5	-0.0024081	-1.59528
6	32470649	32470649	rs375519922	T	G	0.189382	-0.035089	0.003357	1.54e-25	407739	-0.040322	0.00370388	1.33782e-27	DRB5	-0.005233	2.06112
6	32515421	32515421	rs370750957	C	T	0.317433	-0.034201	0.002825	1.08e-33	407739	-0.0336797	0.00311474	2.98776e-27	DRB5	0.0005213	-6.44192
6	32609323	32609323	rs142591955	A	G	0.244778	-0.046247	0.002886	9.44e-58	410776	-0.043073	0.00319308	1.80314e-41	DQA1	0.003174	-16.2811
6	32610888	32610888	rs191251309	A	C	0.079288	-0.057743	0.005194	1.12e-28	448648	-0.0378173	0.00573155	4.16477e-11	DQA1	0.0199257	-17.5704
6	32614569	32614569	rs148889372	A	G	0.197982	-0.031777	0.00334	1.97e-21	412361	-0.0215737	0.00368908	4.97517e-09	DQA1	0.0102033	-12.4023
6	32615015	32615015	rs185831190	T	C	0.16184	-0.048066	0.003519	1.94e-42	416693	-0.0337937	0.00387024	2.50904e-18	DQA1	0.0142723	-24.1117
6	32617104	32617104	rs188694433	T	C	0.325729	-0.037697	0.002389	4.79e-56	449624	-0.0343502	0.00266001	3.77322e-38	DQA1	0.0033468	-17.8964
6	32618190	32618190	rs185774696	T	C	0.273471	-0.02636	0.002699	1.7e-22	445208	-0.0215667	0.00297984	4.56936e-13	DQA1	0.0047933	-9.42941
6	32624033	32624033	rs193147579	T	C	0.275346	-0.032347	0.002634	1.24e-34	488169	-0.026279	0.00292345	2.494e-19	DQA1	0.006068	-15.3035
6	33607103	33607103	rs150273297	A	T	0.186025	0.017462	0.00239	2.88e-13	562378	0.0162568	0.00271508	2.1295e-09	ITPR3	-0.0012052	-3.86889
6	36207598	36207598	rs9380559	A	G	0.630085	0.013441	0.001912	2.12e-12	559201	0.0146805	0.00211829	4.19822e-12	PLPL1	0.0012395	-0.296729
6	37027232	37027232	rs9366927	C	T	0.4899	0.019726	0.001845	1.18e-26	559844	0.020519	0.00206063	2.33475e-23	FGD2	0.000793	-3.29636
6	43710767	43710767	rs77398754	C	T	0.041371	-0.029055	0.004693	6.13e-10	563944	-0.037015	0.0053574	4.87665e-12	VEGFA	-0.00796	2.09934
6	43722953	43722953	rs833051	A	T	0.131948	0.026379	0.002747	8.18e-22	563941	0.0249669	0.00312824	1.44986e-15	VEGFA	-0.0014121	-6.24857
6	43766929	43766929	rs114142949	T	C	0.037033	-0.059185	0.005313	8.59e-29	563942	-0.0338548	0.00607641	2.52544e-08	VEGFA	0.0253302	-20.4683
6	43800194	43800194	rs77537019	C	A	0.049596	0.029695	0.00457	8.39e-11	563003	0.028661	0.00522592	4.1489e-08	VEGFA	-0.001034	-2.69417
6	43801654	43801654	rs62401198	T	C	0.157361	-0.034608	0.00257	2.74e-41	562858	-0.0366414	0.00292297	4.76327e-36	VEGFA	-0.0020334	-5.24015
6	43868986	43868986	rs1539508	A	G	0.545047	0.020746	0.001923	4.15e-27	561274	0.0234693	0.00215409	1.21422e-27	CF223	0.0027233	0.533751
6	43941137	43941137	rs17287978	C	T	0.047501	-0.069139	0.004591	3.28e-51	510121	-0.0657624	0.00518716	7.83793e-37	CF223	0.0033766	-14.3783
6	44030011	44030011	rs833805	A	G	0.114697	-0.065863	0.003188	8.92e-95	507456	-0.07014	0.00355764	1.59393e-86	RM14	-0.004277	-8.2521
6	51098648	51098648	rs4533991	T	G	0.470378	-0.012563	0.001919	6.08e-11	563002	-0.0125914	0.00215052	4.7682e-09	AP2B	-2.84e-05	-1.89445
6	51838263	51838263	rs9296668	G	A	0.483048	0.014447	0.001861	8.73e-15	558114	0.0149645	0.00207438	5.43442e-13	PKHD1	0.0005175	-1.79414
6	116422534	116422534	rs9400888	T	C	0.459713	-0.010574	0.001859	1.33e-08	562998	-0.0120216	0.00212784	1.60749e-08	NT5D1	-0.0014476	-0.0822966
6	126223944	126223944	rs4897160	A	G	0.477574	0.017584	0.001906	2.94e-20	562357	0.0152428	0.00211322	5.47011e-13	NCOA7	-0.0023412	-7.26965
6	135419018	135419018	rs9399137	C	T	0.249054	-0.048392	0.002148	2.25e-112	563945	-0.0520112	0.00237419	2.23296e-106	HBS1L	-0.0036192	-5.9967
6	163758350	163758350	rs12527711	T	C	0.206902	-0.015642	0.002335	2.16e-11	563004	-0.0152985	0.00264073	6.90293e-09	PACRG	0.0003435	-2.50458
6	163777919	163777919	rs12203342	A	G	0.406778	-0.012106	0.001876	1.13e-10	561852	-0.0122101	0.00214204	1.19655e-08	PACRG	-0.0001041	-2.02485
6	170800020	170800020	rs9460209	C	G	0.297476	0.011914	0.002122	2.02e-08	506022	0.0131882	0.00235163	2.04535e-08	PSB1	0.0012742	-0.00541627
7	141615	141615	rs117495040	A	G	0.02856	0.035461	0.005945	2.53e-09	493772	0.0369435	0.00656177	1.80094e-08	DMP4	0.0014825	-0.852379
7	1286567	1286567	rs62435145	T	G	0.690307	-0.036255	0.002167	9.14e-63	500081	-0.0344953	0.00241635	3.0968e-46	UNC4	0.0017597	-16.53
7	6749758	6749758	rs6967414	A	G	0.108657	0.02285	0.002975	1.67e-14	563002	0.0230936	0.00332184	3.60052e-12	ZNF12	0.0002436	-2.33365
7	25420102	25420102	rs74414571	C	G	0.08624	-0.024558	0.003294	9.4e-14	563945	-0.0246269	0.00375752	5.6e-11	NPVF	-6.89e-05	-2.77506
7	99422433	99422433	rs151118513	T	C	0.002679	-0.212416	0.021989	4.76e-22	542082	-0.210905	0.0250648	3.94845e-17	CP343	0.001511	-4.91882
7	99508425	99508425	rs78082959	C	T	0.000178	-0.951604	0.136043	2.76e-12	407739	-0.928044	0.135962	8.74539e-12	TRIM4	0.02356	-0.50087
7	99602191	99602191	rs6967487	C	T	0.182767	0.025569	0.002412	3.13e-26	559203	0.0231903	0.00267985	4.98987e-18	ZKSC1	-0.0023787	-8.20254
7	99740363	99740363	rs140600498	G	A	0.01111	-0.067822	0.008991	4.79e-14	562581	-0.0700028	0.0103274	1.21575e-11	LTOR4	-0.0021808	-2.40451
7	99760955	99760955	rs185672063	C	G	0.007302	-0.216104	0.011425	9.62e-80	563301	-0.2034	0.0131076	2.63431e-54	G3ST4	0.012704	-25.4375
7	100159121	100159121	rs180873866	A	G	0.005677	0.096926	0.013673	1.41e-12	494874	0.0909328	0.0154211	3.70929e-09	AGFG2	-0.0059932	-3.42007
7	100218631	100218631	rs41295942	T	C	0.031619	0.042869	0.005383	1.74e-15	562083	0.0400114	0.00616365	8.49748e-11	TFR2	-0.0028576	-4.68874
7	100225847	100225847	rs139178017	T	C	0.005069	0.177901	0.013674	1.18e-38	500702	0.158432	0.0154772	1.3608e-24	TFR2	-0.019469	-14.0619
7	100226902	100226902	rs41303501	T	C	0.004972	0.120154	0.014765	4.23e-16	503973	0.121119	0.0170796	1.32702e-12	TFR2	0.000965	-3.49654
7	100306920	100306920	rs182552845	A	G	0.022625	-0.047763	0.006819	2.58e-12	508264	-0.0449088	0.00770949	5.70669e-09	POP7	0.0028542	-3.34476
7	100309180	100309180	rs143593369	G	A	0.00827	-0.2916	0.011683	1.96e-137	505319	-0.285746	0.0132666	6.73955e-103	POP7	0.005854	-34.5364
7	100314474	100314474	rs149823406	T	C	0.008925	-0.120566	0.010467	1.15e-30	554417	-0.123121	0.0118771	3.53259e-25	EPO	-0.002555	-5.4874
7	100319633	100319633	rs62483572	A	G	0.005348	-0.281331	0.013225	2.38e-100	557241	-0.27275	0.0150146	9.65109e-74	EPO	0.008581	-26.608
7	100373077	100373077	rs542137	G	C	0.370379	0.025941	0.001916	1.02e-41	562358	0.0245638	0.00212175	5.38129e-31	ZAN	-0.0013772	-10.7223
7	100551106	100551106	rs62483697	G	A	0.116491	-0.018532	0.003027	9.51e-10	503755	-0.0211505	0.0033666	3.33263e-10	MUC3A	-0.0026185	0.455393
7	100985415	100985415	rs150214947	G	T	0.043415	-0.037737	0.004629	3.78e-16	562079	-0.0336372	0.00530398	2.26992e-10	RABL5	0.0040998	-5.77852
7	101237753	101237753	rs55914958	T	C	0.331809	-0.013704	0.001971	3.71e-12	563928	-0.0140835	0.00225012	3.87484e-10	MYL10	-0.0003795	-2.01888
7	128784594	128784594	rs36132066	T	A	0.289605	-0.012683	0.002132	2.77e-09	561884	-0.0137513	0.00241356	1.21564e-08	TSN33	-0.0010683	-0.642325
7	129663496	129663496	rs11556924	T	C	0.384498	-0.015833	0.001917	1.56e-16	559197	-0.016628	0.00212275	4.75535e-15	NIPA	-0.000795	-1.48406
7	151403129	151403129	rs2727563	T	C	0.447223	0.031758	0.00193	8.79e-61	559845	0.0312752	0.00213403	1.24289e-48	AAKG2	-0.0004828	-12.1504
7	151413194	151413194	rs10224210	C	T	0.279735	-0.065907	0.002067	5.07e-223	563940	-0.0617713	0.00227848	7.35657e-162	AAKG2	0.0041357	-61.1617
7	151440915	151440915	rs4546566	C	T	0.428018	0.015763	0.001907	1.46e-16	561920	0.0120757	0.00211395	1.11416e-08	AAKG2	-0.0036873	-7.88259
7	151459655	151459655	rs1104838	C	G	0.247249	0.017147	0.002217	1.08e-14	562853	0.017595	0.00248591	1.46386e-12	AAKG2	0.000448	-2.13208
8	23377161	23377161	rs11784090	T	C	0.134336	0.02227	0.002696	1.52e-16	562359	0.0228498	0.00297723	1.65611e-14	MFRN1	0.0005798	-2.03725
8	23423758	23423758	rs10992	A	G	0.679741	-0.012449	0.001978	3.18e-10	563298	-0.0135148	0.00225598	2.09014e-09	MFRN1	-0.0010658	-0.817748
8	30338513	30338513	rs17627711	A	G	0.231558	0.012924	0.002176	2.96e-09	563942	0.0145102	0.0024242	2.15636e-09	RBPMS	0.0015862	0.13757
8	32458572	32458572	rs116834543	G	A	0.007158	0.061901	0.011117	2.64e-08	562361	0.0743113	0.012678	4.58873e-09	NRG1	0.0124103	0.759911
8	61176092	61176092	rs7002077	C	A	0.415941	0.012187	0.00187	7.49e-11	561852	0.0121185	0.00213702	1.42178e-08	CAH8	-6.85e-05	-2.27835
8	76517182	76517182	rs1375647	A	G	0.191821	-0.018239	0.002342	7.22e-15	563943	-0.0215459	0.00267481	7.94071e-16	HNF4G	-0.0033069	0.958678
8	81428717	81428717	rs446001	A	G	0.293249	-0.017607	0.002034	5.06e-18	560785	-0.0213666	0.00224977	2.15475e-21	ZBT10	-0.0037596	3.37075
8	116417563	116417563	rs231147	T	C	0.496148	0.014072	0.001857	3.71e-14	558118	0.0166192	0.00207094	1.01536e-15	TRPS1	0.0025472	1.56275
8	116623548	116623548	rs62512210	C	T	0.083535	0.024965	0.003364	1.22e-13	563003	0.0213708	0.0038447	2.72076e-08	TRPS1	-0.0035942	-5.34833
8	125867834	125867834	rs55679363	T	A	0.314695	-0.013428	0.001978	1.17e-11	563940	-0.0190451	0.00225581	3.10111e-17	ZN572	-0.0056171	5.57667
9	2520404	2520404	rs7864633	A	G	0.622707	-0.015159	0.001909	2.13e-15	563940	-0.0150897	0.00216954	3.51912e-12	VLDLR	6.93e-05	-3.21805
9	2622278	2622278	rs2219143	A	G	0.394499	0.022289	0.001991	4.55e-29	545551	0.0212544	0.00226688	6.84792e-21	VLDLR	-0.0010346	-8.17755
9	2638823	2638823	rs7044155	T	G	0.361066	0.011297	0.001957	8.05e-09	543346	0.0130192	0.00218324	2.47271e-09	VLDLR	0.0017222	0.512623
9	4118111	4118111	rs6415788	G	T	0.39567	0.024132	0.001914	2.08e-36	561851	0.0223745	0.00212015	4.90454e-26	GLIS3	-0.0017575	-10.3725
9	13555074	13555074	rs13294011	A	G	0.178291	-0.017203	0.002408	9.48e-13	560785	-0.0182024	0.00267639	1.0382e-11	MPDZ	-0.0009994	-1.03947
9	13976285	13976285	rs17278406	A	G	0.301546	-0.033745	0.002013	5.06e-63	563004	-0.0337116	0.00225786	2.07786e-50	NFIB	3.34e-05	-12.6135
9	32424893	32424893	rs10813814	A	G	0.247102	-0.015543	0.00217	8.3e-13	561277	-0.0160598	0.00241904	3.15962e-11	ACOC	-0.0005168	-1.58056
9	32450187	32450187	rs12985	C	T	0.374778	0.018929	0.001909	3.75e-23	562359	0.019893	0.00216954	4.76309e-20	ACOC	0.000964	-3.10386
9	32455262	32455262	rs7045087	C	T	0.29873	-0.019266	0.002011	1.01e-21	562358	-0.0179208	0.00228353	4.23158e-15	DDX58	0.0013452	-6.62218
9	32576229	32576229	rs146870654	T	A	0.006732	0.081456	0.012826	2.21e-10	558577	0.0872138	0.0146228	2.458e-09	NDUB6	0.0057578	-1.04619
9	71830308	71830308	rs2309426	G	T	0.383681	-0.010673	0.001926	3.05e-08	545578	-0.0129464	0.00215666	1.93713e-09	ZO2	-0.0022734	1.19714
9	92213967	92213967	rs1007966	A	G	0.507838	-0.011575	0.001855	4.47e-10	562357	-0.0140521	0.00206922	1.11356e-11	GA45G	-0.0024771	1.60359
9	92263349	92263349	rs11265853	G	A	0.736448	0.013837	0.002097	4.27e-11	560774	0.0150769	0.00233001	9.75195e-11	GA45G	0.0012399	-0.358664
9	93801208	93801208	rs2184540	A	G	0.234038	0.016877	0.002188	1.29e-14	563002	0.0151542	0.00248893	1.13874e-09	KSYK	-0.0017228	-4.94583
9	116349298	116349298	rs10981835	A	G	0.147947	-0.023483	0.002612	2.63e-19	559200	-0.0253072	0.00290445	2.95224e-18	RGS3	-0.0018242	-1.0502
9	130629139	130629139	rs913987	T	G	0.175205	0.039017	0.002557	1.59e-52	504293	0.0397762	0.00278202	2.26481e-46	KAD1	0.0007592	-6.15363
9	131841887	131841887	rs10819461	C	T	0.279268	-0.015514	0.002086	1.07e-13	562358	-0.0136536	0.00232051	4.00823e-09	DOPP1	0.0018604	-4.57357
9	136042866	136042866	rs11244018	G	C	0.34301	0.015899	0.001952	3.93e-16	563945	0.0149335	0.00217895	7.20491e-12	GBGT1	-0.0009655	-4.26324
9	136106974	136106974	rs71503180	A	G	0.080649	0.024031	0.00343	2.56e-12	562528	0.0284043	0.00390001	3.26132e-13	OBP2B	0.0043733	0.894847
9	136123092	136123092	rs11244049	C	T	0.065483	0.075762	0.003779	2.35e-89	562526	0.0682479	0.00419848	2.04589e-59	OBP2B	-0.0075141	-29.9398
9	136155127	136155127	rs13298002	A	G	0.068678	-0.02347	0.00364	1.17e-10	563941	-0.0248821	0.00402617	6.40648e-10	SURF6	-0.0014121	-0.738434
9	136340200	136340200	rs2073935	T	G	0.275764	-0.032532	0.002165	5.6e-51	509480	-0.0335303	0.00241463	7.6697e-44	GTR6	-0.0009983	-7.13659
9	136377711	136377711	rs186365095	T	C	0.008933	-0.076183	0.013371	1.25e-08	493617	-0.0854513	0.015055	1.37934e-08	TMM8C	-0.0092683	-0.0427613
9	136826457	136826457	rs2073829	G	A	0.334354	0.016464	0.002068	1.76e-15	508538	0.0148783	0.00227935	6.69117e-11	VAV2	-0.0015857	-4.57999
10	3791224	3791224	rs10904089	G	T	0.506706	-0.014528	0.001878	1.09e-14	562358	-0.0160444	0.00208902	1.58657e-14	KLF6	-0.0015164	-0.163033
10	5246085	5246085	rs17134531	A	G	0.152399	0.021655	0.002562	3e-17	560787	0.0242767	0.00286141	2.17265e-17	AK1C4	0.0026217	0.140131
10	44858681	44858681	rs10900027	A	C	0.278056	0.022189	0.002112	8.74e-26	561908	0.0205347	0.00236958	4.47695e-18	SDF1	-0.0016543	-7.70947
10	48411796	48411796	rs34130368	T	G	0.116112	-0.026623	0.002957	2.35e-19	563005	-0.0269698	0.00336122	1.02505e-15	GDF2	-0.0003468	-3.63968
10	70210098	70210098	rs116910421	A	G	0.003601	0.097973	0.015955	8.47e-10	551896	0.108375	0.0180722	2.01282e-09	DNA2	0.010402	-0.375922
10	71001110	71001110	rs7918272	G	C	0.484528	-0.023807	0.001875	7e-37	563000	-0.0250478	0.00208643	3.34179e-33	HKDC1	-0.0012408	-3.67888
10	71014798	71014798	rs77380489	A	G	0.048758	0.041312	0.004363	3.02e-21	563005	0.0452761	0.00496668	7.79804e-20	HKDC1	0.0039641	-1.41198
10	77938242	77938242	rs4746372	G	A	0.757742	-0.016847	0.002165	7.55e-15	562360	-0.0157098	0.00238898	4.8349e-11	CJ011	0.0011372	-3.80644
10	91395428	91395428	rs1359624	C	T	0.260476	-0.012773	0.002123	1.83e-09	559203	-0.012977	0.0023525	3.4632e-08	PANK1	-0.000204	-1.27703
10	96999873	96999873	rs7910217	A	G	0.320646	0.01302	0.001968	3.8e-11	563945	0.013606	0.00224744	1.4131e-09	PDLI1	0.000586	-1.57039
10	126498852	126498852	rs10901825	C	T	0.240967	0.013692	0.002158	2.29e-10	563946	0.015862	0.00246378	1.20993e-10	F175B	0.00217	0.277075
11	1874221	1874221	rs907612	T	C	0.380254	-0.012054	0.002005	1.9e-09	509136	-0.012915	0.00225089	9.59557e-09	LSP1	-0.000861	-0.703317
11	9002477	9002477	rs2568044	T	C	0.225144	0.018484	0.002208	6.06e-17	563946	0.020896	0.00250575	7.47957e-17	NRIP3	0.002412	-0.091404
11	9235473	9235473	rs9666585	G	A	0.037839	-0.028605	0.00486	4.07e-09	563000	-0.0354293	0.00536534	4.0193e-11	DEN5A	-0.0068243	2.00544
11	9927580	9927580	rs12361732	C	T	0.133233	0.024587	0.002757	4.98e-19	563943	0.0303788	0.00313663	3.48604e-22	MTMRD	0.0057918	3.1549
11	10373076	10373076	rs182264490	C	G	0.005269	0.092257	0.01412	6.64e-11	540482	0.1283	0.0159931	1.03852e-15	AMPD3	0.036043	4.80575
11	10389394	10389394	rs11042756	A	G	0.131412	-0.016726	0.00277	1.6e-09	563943	-0.0203791	0.00314756	9.5076e-11	AMPD3	-0.0036531	1.22605
11	10508903	10508903	rs117706710	T	G	0.009302	-0.0773	0.009828	3.85e-15	562361	-0.074785	0.0112274	2.7205e-11	AMPD3	0.002515	-3.84919
11	13331324	13331324	rs4757145	A	G	0.383318	0.015196	0.001921	2.72e-15	546007	0.015811	0.00212622	1.03618e-13	BMAL1	0.000615	-1.58087
11	30754837	30754837	rs55733296	A	G	0.038129	-0.061977	0.00486	3.32e-37	562088	-0.060078	0.00555412	2.86501e-27	DCDC1	0.001899	-9.93599
11	31517087	31517087	rs1223110	T	C	0.192008	-0.023432	0.002379	7.38e-23	563941	-0.0209176	0.00270583	1.07074e-14	IMP1L	0.0025144	-8.16163
11	47380593	47380593	rs3740689	A	G	0.585056	0.013812	0.001888	2.67e-13	561916	0.0168805	0.0020724	3.78122e-16	SPI1	0.0030685	2.84888
11	47974373	47974373	rs1631174	A	C	0.336035	-0.012265	0.001947	3.08e-10	562855	-0.0180558	0.00223009	5.65819e-16	PTPRJ	-0.0057908	5.73587
11	67182383	67182383	rs1115051	G	A	0.067527	-0.020801	0.003783	3.93e-08	563698	-0.0243499	0.00425412	1.04142e-08	PP1A	-0.0035489	0.576767
11	74040994	74040994	rs3867269	C	G	0.508093	0.01167	0.001837	2.18e-10	563944	0.0126363	0.00205376	7.61572e-10	PGM2L	0.0009663	-0.543254
11	95795807	95795807	rs12800440	T	C	0.235408	-0.014323	0.002223	1.2e-10	559200	-0.0171479	0.00249104	5.82609e-12	MAML2	-0.0028249	1.3138
11	95928212	95928212	rs12788404	T	C	0.291505	0.014466	0.00204	1.37e-12	562360	0.0153269	0.00228096	1.82346e-11	MAML2	0.0008609	-1.12418
11	117267884	117267884	rs573455	G	A	0.535068	0.012339	0.001847	2.48e-11	561921	0.0133071	0.00203657	6.40044e-11	CE164	0.0009681	-0.411758
11	118298252	118298252	rs4456287	C	T	0.216891	-0.016409	0.002239	2.42e-13	560786	-0.0151004	0.00247865	1.11373e-09	ATP5L	0.0013086	-3.66296
12	2421588	2421588	rs2108570	A	G	0.209478	-0.016291	0.002297	1.36e-12	544926	-0.01898	0.0025546	1.08821e-13	CAC1C	-0.002689	1.09683
12	2521812	2521812	rs17223841	G	A	0.370688	0.027756	0.001909	7.31e-48	562358	0.0278963	0.00211569	1.06408e-39	CAC1C	0.0001403	-8.16306
12	2671735	2671735	rs74460986	T	A	0.080979	0.019058	0.003416	2.47e-08	563005	0.0216458	0.00388825	2.59194e-08	CAC1C	0.0025878	-0.020928
12	13046211	13046211	rs12811512	T	C	0.152009	-0.031266	0.002569	4.99e-34	563938	-0.0325077	0.00292203	9.47286e-29	RAI3	-0.0012417	-5.27838
12	24156829	24156829	rs11047198	T	A	0.539336	0.013086	0.001866	2.43e-12	563938	0.0131204	0.00213368	7.78797e-10	SOX5	3.44e-05	-2.50582
12	24195042	24195042	rs11047224	C	G	0.036647	-0.029502	0.004903	1.83e-09	563945	-0.0346364	0.00550677	3.17901e-10	SOX5	-0.0051344	0.760159
12	48512285	48512285	rs4760682	C	A	0.18714	0.035427	0.002042	2.22e-67	563945	0.0404247	0.00242949	3.626e-62	K6PF	0.0049977	-5.21307
12	48752056	48752056	rs9788082	A	C	0.220215	-0.021791	0.001931	1.69e-29	563945	-0.0217226	0.00230925	5.11522e-21	ZN641	6.84e-05	-8.48098
12	49146655	49146655	rs148967402	A	G	0.019958	0.041083	0.006369	1.15e-10	563928	0.0439491	0.0073921	2.75763e-09	ADCY6	0.0028661	-1.37984
12	69655167	69655167	rs7969559	A	G	0.282578	-0.011412	0.00205	2.66e-08	560786	-0.0142675	0.00228954	4.61674e-10	CPSF6	-0.0028555	1.76055
12	91154207	91154207	rs7954238	C	T	0.273548	0.014309	0.002065	4.34e-12	562361	0.0157895	0.00230243	6.9948e-12	CCER1	0.0014805	-0.207286
12	109036359	109036359	rs1558801	C	A	0.390759	0.01128	0.001926	4.82e-09	561410	0.0133128	0.00218386	1.08762e-09	COR1C	0.0020328	0.64657
12	111288843	111288843	rs10219717	T	C	0.381942	0.017633	0.001938	9.68e-20	559701	0.0161844	0.00216693	8.09225e-14	CCD63	-0.0014486	-5.92219
12	111426615	111426615	rs7968960	C	A	0.34333	0.035676	0.001959	4.96e-74	562859	0.0317099	0.00215927	7.98488e-49	CUX2	-0.0039661	-25.2068
12	111764556	111764556	rs147459200	G	A	0.047774	-0.033359	0.004366	2.27e-14	563937	-0.0301846	0.00494113	1.00361e-09	CUX2	0.0031744	-4.64554
12	111881327	111881327	rs184250093	A	G	0.003445	0.119918	0.017844	1.88e-11	492038	0.111201	0.0200869	3.09468e-08	SH2B3	-0.008717	-3.21646
12	111923455	111923455	rs17805591	A	G	0.038004	-0.050683	0.004872	2.57e-25	559204	-0.044378	0.00535089	1.099e-16	ATX2	0.006305	-8.63106
12	111932800	111932800	rs7137828	C	T	0.483762	0.064984	0.00184	3.69e-273	562853	0.059743	0.00208336	7.54643e-181	ATX2	-0.005241	-92.3107
12	111993571	111993571	rs11610849	A	G	0.030176	-0.061845	0.005543	7.19e-29	562088	-0.0628427	0.00613677	1.30759e-24	ATX2	-0.0009977	-4.25974
12	112090022	112090022	rs10744774	C	A	0.165822	-0.032438	0.002519	6.47e-38	562363	-0.0259215	0.00277279	8.8878e-21	BRAP	0.0065165	-17.1379
12	112501984	112501984	rs191012961	G	A	0.003128	0.136274	0.019334	1.88e-12	490857	0.126732	0.0217906	6.03082e-09	NAA25	-0.009542	-3.50622
12	112601733	112601733	rs111277819	A	T	0.036533	-0.052053	0.004946	7.21e-26	563937	-0.0457127	0.0055442	1.64963e-16	HECD4	0.0063403	-9.35945
12	112674718	112674718	rs73207624	T	C	0.037531	0.038716	0.00488	2.23e-15	563945	0.0391325	0.00557084	2.14802e-12	HECD4	0.0004165	-2.98373
12	112883476	112883476	rs11066309	A	G	0.411869	0.055642	0.001878	6.51e-193	561852	0.0511238	0.00214371	1.05544e-125	PTN11	-0.0045182	-67.2099
12	112902808	112902808	rs17822514	T	C	0.028781	-0.058507	0.005516	3e-26	563945	-0.0603651	0.00621922	2.83671e-22	PTN11	-0.0018581	-3.97569
12	112904955	112904955	rs11614544	G	A	0.13702	-0.029211	0.002743	1.87e-26	562085	-0.0233512	0.0030697	2.80524e-14	PTN11	0.0058598	-12.1761
12	113016244	113016244	rs74672796	A	C	0.092013	-0.026571	0.003243	2.69e-16	561852	-0.0275701	0.00368634	7.49032e-14	RP3A	-0.0009991	-2.44475
12	113031474	113031474	rs233722	G	A	0.400284	0.027716	0.001896	2.31e-48	561275	0.0257144	0.00207931	3.95155e-35	RP3A	-0.0020016	-13.2332
12	113235279	113235279	rs7132088	T	C	0.437626	-0.017971	0.001885	1.64e-21	561913	-0.0170737	0.00214957	1.97581e-15	RP3A	0.0008973	-6.0809
12	117599349	117599349	rs6490117	C	G	0.54674	0.015318	0.001855	1.58e-16	560786	0.0150384	0.00206922	3.65732e-13	FBX21	-0.0002796	-3.36451
12	121299408	121299408	rs688402	C	T	0.354443	-0.01241	0.00193	1.31e-10	559846	-0.0139605	0.00213403	6.07586e-11	SPPL3	-0.0015505	0.333664
12	133105852	133105852	rs4242906	G	A	0.230094	0.018374	0.002297	1.32e-15	510119	0.0194072	0.00258117	5.52959e-14	FBSL	0.0010332	-1.62212
13	28718574	28718574	rs9581999	G	A	0.153589	-0.014594	0.00257	1.4e-08	563920	-0.0159015	0.00289516	3.96411e-08	PAN3	-0.0013075	-0.452018
13	29230581	29230581	rs1340817	A	G	0.646288	0.022988	0.001932	1.27e-32	560788	0.0235399	0.00216179	1.29956e-27	POMP	0.0005519	-5.00999
13	33723244	33723244	rs12863103	T	C	0.287473	0.014558	0.002046	1.15e-12	560787	0.0168668	0.00228611	1.6071e-13	STA13	0.0023088	0.854655
13	114551993	114551993	rs6602909	C	T	0.32743	0.019932	0.002077	8.72e-22	502069	0.0185865	0.00233951	1.9481e-15	GAS6	-0.0013455	-6.34909
14	23495048	23495048	rs941718	C	T	0.281956	-0.011755	0.002047	9.59e-09	563006	-0.0136157	0.00228696	2.62268e-09	PSB5	-0.0018607	0.563073
14	36050217	36050217	rs77406312	C	T	0.086878	-0.029025	0.003319	2.36e-18	563944	-0.0292644	0.00377842	9.54634e-15	RGPA1	-0.0002394	-3.60692
14	50655357	50655357	rs72681869	C	G	0.010306	0.065351	0.009361	3.04e-12	557020	0.067366	0.0106087	2.15198e-10	SOS2	0.002015	-1.84996
14	50923249	50923249	rs12881869	T	C	0.070375	-0.029525	0.003604	2.7e-16	562362	-0.024733	0.00402066	7.67623e-10	M4K5	0.004792	-6.45378
14	51133287	51133287	rs2934701	T	A	0.426121	0.012511	0.00187	2.3e-11	563942	0.0131297	0.00210893	4.79257e-10	SAV1	0.0006187	-1.31884
14	64703593	64703593	rs1256061	T	G	0.475101	-0.025386	0.001846	5.67e-43	562993	-0.021458	0.00206148	2.25579e-25	ESR2	0.003928	-17.5997
14	65513835	65513835	rs55771504	C	T	0.137986	0.027509	0.002683	1.23e-24	563943	0.0265095	0.00307474	6.59673e-18	FNTB	-0.0009995	-6.72942
14	73323682	73323682	rs6574100	T	A	0.399679	-0.01378	0.001881	2.46e-13	563941	-0.0130262	0.00209161	4.72918e-10	DPF3	0.0007538	-3.28385
14	73884540	73884540	rs10142359	A	G	0.514478	-0.013535	0.001838	1.85e-13	563944	-0.0138142	0.00208167	3.22097e-11	NUMB	-0.0002792	-2.24081
14	74084993	74084993	rs146203818	T	C	0.007086	0.077018	0.011466	1.92e-11	563302	0.0821507	0.0131417	4.07511e-10	ACOT6	0.0051327	-1.32684
14	76624547	76624547	rs8020977	G	T	0.528915	0.012513	0.001849	1.35e-11	559195	0.0123759	0.00206406	2.02368e-09	GPT2L	-0.0001371	-2.17581
15	41209516	41209516	rs6492970	A	G	0.443486	0.011038	0.001904	6.93e-09	563931	0.013382	0.00211149	2.33187e-10	DLL4	0.002344	1.47303
15	41464995	41464995	rs73396340	T	C	0.164504	-0.019414	0.002497	7.85e-15	562532	-0.015797	0.00283339	2.47097e-08	EXD1	0.003617	-6.498
15	42450180	42450180	rs146131796	T	A	0.019891	-0.067696	0.006883	8.49e-23	563943	-0.0751812	0.00787636	1.35885e-21	VPS39	-0.0074852	-1.20426
15	42876014	42876014	rs7168835	T	C	0.286821	-0.015023	0.00203	1.43e-13	563946	-0.0152299	0.0022463	1.20164e-11	STAR9	-0.0002069	-1.92444
15	43099550	43099550	rs149492745	T	C	0.022649	-0.079673	0.006587	1.21e-33	562083	-0.0926719	0.0075142	6.02273e-35	TTBK2	-0.0129989	1.30299
15	44257954	44257954	rs2957582	T	C	0.280032	-0.015725	0.002105	8.32e-14	562823	-0.0145899	0.00236322	6.67037e-10	FRMD5	0.0011351	-3.90403
15	44297617	44297617	rs138893177	T	C	0.025177	-0.081799	0.005914	1.83e-43	563844	-0.0900436	0.00677966	2.96677e-40	FRMD5	-0.0082446	-3.20983
15	44842210	44842210	rs151291132	G	A	0.025276	-0.077293	0.006143	2.86e-36	562085	-0.0838126	0.0069997	4.8785e-33	EIF3J	-0.0065196	-3.23192
15	58723939	58723939	rs2070895	A	G	0.218914	-0.022901	0.002223	7.47e-25	563942	-0.019697	0.00246478	1.33456e-15	AL1A2	0.003204	-9.25202
15	64370622	64370622	rs76498583	A	T	0.073419	-0.020504	0.003573	9.82e-09	563901	-0.0223316	0.00407677	4.30758e-08	FA96A	-0.0018276	-0.642122
15	66943404	66943404	rs8030097	C	G	0.190173	-0.023816	0.002376	1.3e-23	563943	-0.0241252	0.00270343	4.50089e-19	SMAD6	-0.0003092	-4.53936
15	67055081	67055081	rs4467023	A	G	0.462678	0.013098	0.00189	4.33e-12	562357	0.014235	0.00209938	1.19701e-11	SMAD6	0.001137	-0.44161
15	67146200	67146200	rs181269956	G	A	0.010825	0.071992	0.009003	1.35e-15	563297	0.0691346	0.0102794	1.74968e-11	SMAD6	-0.0028574	-4.11262
15	68329444	68329444	rs11071975	T	G	0.269789	-0.015748	0.002102	7.16e-14	560783	-0.0136443	0.00230906	3.44136e-09	PIAS1	0.0021037	-4.68182
15	72656241	72656241	rs11633028	G	A	0.726112	0.015649	0.002105	1.1e-13	563004	0.0153076	0.00231169	3.5475e-11	HEXA	-0.0003414	-2.50853
15	75510626	75510626	rs117953640	G	A	0.03615	0.029867	0.005173	7.98e-09	562086	0.0339681	0.00587349	7.32546e-09	CO039	0.0041011	0.037168
15	75977920	75977920	rs62027240	G	A	0.557386	-0.01162	0.001941	2.21e-09	510113	-0.0144095	0.00219669	5.39262e-11	CSPG4	-0.0027895	1.61259
15	76119092	76119092	rs3991319	T	C	0.104024	0.0194	0.00306	2.37e-10	563002	0.023706	0.00342168	4.2628e-12	UB2Q2	0.004306	1.74505
15	76196496	76196496	rs374074953	G	A	0.023861	0.073571	0.006018	2.47e-34	563936	0.0679911	0.00686648	4.08489e-23	FBX22	-0.0055799	-11.2185
15	76298132	76298132	rs4886755	G	A	0.511547	-0.034268	0.001842	3.25e-77	563942	-0.0318912	0.00205805	3.70234e-54	NRG4	0.0023768	-23.0566
15	76446707	76446707	rs2955739	A	G	0.167436	-0.021972	0.002478	8.04e-19	563945	-0.0198354	0.00276285	7.00597e-13	CO027	0.0021366	-5.94021
15	77183989	77183989	rs117620875	T	C	0.047832	-0.034597	0.004382	3.06e-15	563944	-0.0302863	0.00498264	1.21424e-09	SCAPE	0.0043107	-5.59858
15	77842095	77842095	rs79590310	G	A	0.427702	0.014261	0.001873	2.82e-14	563938	0.0117118	0.00213953	4.40014e-08	LIGO1	-0.0025492	-6.19322
15	78535437	78535437	rs4887023	G	C	0.3921	-0.020445	0.001893	3.74e-27	560764	-0.0206537	0.00210197	8.71191e-23	ACBG1	-0.0002087	-4.36724
15	78664005	78664005	rs8036879	A	G	0.348888	-0.012131	0.001955	5.68e-10	559205	-0.0138907	0.00215578	1.16765e-10	RABP1	-0.0017597	0.687036
15	95740236	95740236	rs290671	T	C	0.3468	0.012528	0.001969	2.05e-10	561384	0.0144217	0.00224845	1.41701e-10	MCTP2	0.0018937	0.160381
15	99998709	99998709	rs4965500	A	G	0.23134	-0.015697	0.002206	1.17e-12	562846	-0.0153843	0.00250393	8.04452e-10	MEF2A	0.0003127	-2.83731
16	159710	159710	rs12931752	A	C	0.487411	-0.017456	0.001962	5.96e-19	492686	-0.0163536	0.00221446	1.5256e-13	NPRL3	0.0011024	-5.40819
16	212649	212649	rs3785309	T	C	0.099614	-0.029619	0.00325	8.45e-20	507451	-0.0261382	0.00358552	3.10164e-13	HBM	0.0034808	-6.56473
16	216593	216593	rs141494605	C	T	0.006746	-0.089594	0.012926	4.33e-12	493770	-0.0865649	0.0145402	2.62472e-09	HBM	0.0030291	-2.7826
16	247470	247470	rs7189975	A	G	0.069533	0.035465	0.003864	4.59e-20	493770	0.032565	0.00427128	2.45577e-14	LUC7L	-0.0029	-5.72838
16	281299	281299	rs3760047	G	A	0.188227	0.027152	0.002445	1.25e-28	546654	0.0278056	0.00276163	7.60782e-24	LUC7L	0.0006536	-4.78435
16	2086421	2086421	rs139491786	T	C	0.006668	-0.118571	0.011945	3.43e-23	505319	-0.1173	0.0134879	3.41529e-18	NHRF2	0.001271	-4.99813
16	4676660	4676660	rs3859158	G	A	0.185088	-0.016985	0.002485	8.55e-12	510121	-0.0226364	0.0027688	2.94543e-16	MGRN1	-0.0056514	4.46282
16	15811062	15811062	rs1050162	T	C	0.493509	-0.011475	0.001853	6.14e-10	559200	-0.0124386	0.0020675	1.7849e-09	MYH11	-0.0009636	-0.463446
16	16259596	16259596	rs41278174	A	G	0.026766	0.052683	0.005992	1.55e-18	508540	0.0517187	0.00676046	2.00696e-14	MRP6	-0.0009643	-4.11221
16	52570969	52570969	rs11648477	C	T	0.209842	-0.015293	0.002267	1.57e-11	560785	-0.0138422	0.00252877	4.40251e-08	TOX3	0.0014508	-3.4478
16	57349346	57349346	rs948705	G	T	0.151891	-0.01795	0.002642	1.13e-11	562363	-0.0177758	0.00288084	6.81401e-10	PLLP	0.0001742	-1.78032
16	58525312	58525312	rs62040067	T	C	0.110956	0.016771	0.002999	2.3e-08	563934	0.0224925	0.00339654	3.53949e-11	NDRG4	0.0057215	2.81279
16	70769812	70769812	rs62048007	A	G	0.061751	0.027021	0.004	1.47e-11	563005	0.0302268	0.00457742	4.01673e-11	VAC14	0.0032058	-0.436555
16	72110323	72110323	rs146254843	T	G	0.021906	-0.040816	0.006347	1.31e-10	560444	-0.0445003	0.00728513	1.00653e-09	HPTR	-0.0036843	-0.885555
16	72144174	72144174	rs9302635	C	T	0.182574	-0.022642	0.002389	2.74e-21	559845	-0.023297	0.00263438	9.28311e-19	PRP16	-0.000655	-2.52994
16	72153518	72153518	rs186286	G	A	0.082822	-0.021384	0.003376	2.47e-10	563944	-0.0211753	0.00388408	4.98585e-08	PMFBP	0.0002087	-2.30504
16	72256903	72256903	rs12934528	C	T	0.151825	0.015891	0.002601	1.02e-09	563946	0.0170671	0.00289496	3.73677e-09	PMFBP	0.0011761	-0.563896
16	72380784	72380784	rs17607285	C	T	0.090323	0.024381	0.003213	3.41e-14	562362	0.0278211	0.00357915	7.6591e-15	PMFBP	0.0034401	0.648577
16	72895614	72895614	rs62053163	G	A	0.045995	0.025135	0.004469	1.92e-08	562087	0.0307444	0.00511283	1.81898e-09	ZFHX3	0.0056094	1.02347
16	79199414	79199414	rs1110542	A	T	0.580683	0.014747	0.001869	3.13e-15	563939	0.0148144	0.00208126	1.09498e-12	WWOX	6.74e-05	-2.54386
16	83980529	83980529	rs4782568	G	C	0.448292	0.010707	0.001879	1.25e-08	562857	0.0117434	0.00208974	1.91477e-08	OSGI1	0.0010364	-0.185207
16	86356582	86356582	rs731749	A	G	0.086253	-0.036802	0.003389	1.96e-27	562361	-0.0366313	0.00378314	3.56895e-22	FOXF1	0.0001707	-5.26028
16	88567333	88567333	rs74035509	T	C	0.07972	0.025898	0.003625	9.48e-13	510121	0.0276939	0.00406529	9.6051e-12	FOG1	0.0017959	-1.00569
16	88777073	88777073	rs12925612	C	G	0.011749	-0.077047	0.009335	1.62e-16	508030	-0.0659496	0.0105313	3.79414e-10	CTU2	0.0110974	-6.3696
16	88782050	88782050	rs61745086	A	G	0.01027	0.103746	0.010117	1.21e-24	503374	0.0938628	0.01147	2.76185e-16	PIEZ1	-0.0098832	-8.35841
16	88898786	88898786	rs8050636	T	C	0.169045	-0.031039	0.002636	5.82e-32	509180	-0.0297302	0.00297864	1.84349e-23	GALNS	0.0013088	-8.50072
16	88972591	88972591	rs117482119	G	C	0.029485	0.036791	0.006023	1.03e-09	502882	0.0382396	0.00681434	2.00428e-08	MTG16	0.0014486	-1.28912
17	1618363	1618363	rs11078597	C	T	0.186042	-0.01417	0.002483	1.18e-08	508541	-0.0172406	0.00276715	4.65043e-10	WDR81	-0.0030706	1.40439
17	7106378	7106378	rs200489612	A	G	0.005373	0.111097	0.014637	3.35e-14	495608	0.0948369	0.0165413	9.84768e-09	DLG4	-0.0162601	-5.46829
17	7571452	7571452	rs1614984	A	G	0.429916	0.010913	0.001899	9.36e-09	561918	0.0131879	0.00216131	1.04886e-09	P53	0.0022749	0.950558
17	35851177	35851177	rs865483	A	C	0.35675	0.012147	0.001926	2.95e-10	563946	0.0131793	0.00221262	2.5781e-09	DUS14	0.0010323	-0.941478
17	36173595	36173595	rs3942352	C	T	0.294391	-0.013225	0.00203	7.56e-11	561920	-0.0146036	0.0022463	7.968e-11	HNF1B	-0.0013786	-0.0228275
17	42979592	42979592	rs12451394	A	G	0.215765	-0.013543	0.002239	1.49e-09	562359	-0.0155775	0.00250474	4.9966e-10	CC103	-0.0020345	0.474512
17	45805177	45805177	rs72831632	T	C	0.172005	0.01431	0.002446	5.02e-09	563939	0.018034	0.00279056	1.02987e-10	TBX21	0.003724	1.68792
17	46010380	46010380	rs11079802	C	G	0.293392	0.016974	0.002024	5.31e-17	562085	0.0144239	0.00224098	1.22325e-10	SP2	-0.0025501	-6.36242
17	46129762	46129762	rs17680229	A	G	0.151138	-0.024222	0.002606	1.56e-20	560785	-0.0246039	0.00289927	2.13462e-17	NF2L1	-0.0003819	-3.1362
17	47319438	47319438	rs148633519	A	G	0.020414	-0.047001	0.006901	1e-11	563945	-0.0454941	0.00792061	9.25936e-09	PHOP1	0.0015069	-2.96658
17	58636329	58636329	rs1197066	G	A	0.12715	-0.024309	0.002922	9.25e-17	563945	-0.0249959	0.00324998	1.45898e-14	APBP2	-0.0006869	-2.19791
17	58778660	58778660	rs75965812	G	A	0.046065	-0.027657	0.004532	1.08e-09	563300	-0.0302783	0.00516526	4.57549e-09	BCAS3	-0.0026213	-0.627014
17	67081278	67081278	rs77542162	G	A	0.021712	0.088	0.006366	2.02e-43	563302	0.10509	0.00727208	2.4626e-47	ABCA6	0.01709	3.91396
17	79768848	79768848	rs2272030	G	A	0.18506	-0.01689	0.002559	4.24e-11	510090	-0.0178566	0.00288582	6.10486e-10	GLR	-0.0009666	-1.15831
18	12564420	12564420	rs34737110	A	G	0.089757	-0.018947	0.003232	4.67e-09	563943	-0.0217746	0.00370576	4.20601e-09	SPIR1	-0.0028276	0.0454466
18	12830538	12830538	rs12971201	A	G	0.399646	-0.016759	0.001878	4.77e-19	563941	-0.0138963	0.00208902	2.89055e-11	PTN2	0.0028627	-7.78246
18	42810533	42810533	rs12606193	T	C	0.189268	0.016422	0.002349	2.82e-12	563944	0.0151505	0.00268079	1.59059e-08	UT2	-0.0012715	-3.75131
18	46207268	46207268	rs78415359	A	G	0.030279	-0.049627	0.005476	1.35e-19	563943	-0.0395966	0.00621312	1.85298e-10	CTIF	0.0100304	-9.13754
18	46399092	46399092	rs62103337	A	G	0.284572	-0.013268	0.002102	2.84e-10	563003	-0.0138179	0.00238841	7.23351e-09	CTIF	-0.0005499	-1.40603
18	46460903	46460903	rs2337106	C	G	0.481509	0.019717	0.001866	4.64e-26	563907	0.0226108	0.00207868	1.47544e-27	SMAD7	0.0028938	1.4976
18	60104170	60104170	rs9953010	T	C	0.301079	-0.011236	0.002046	4.07e-08	562363	-0.0139243	0.00228611	1.12312e-09	TNR11	-0.0026883	1.55917
19	1435771	1435771	rs3760994	A	G	0.495207	0.015085	0.001959	1.4e-14	505587	0.0155329	0.00215916	6.29395e-13	DAZP1	0.0004479	-1.6528
19	2116649	2116649	rs2074960	G	A	0.216059	-0.014434	0.002376	1.27e-09	493758	-0.0181892	0.00267561	1.05975e-11	AP3D1	-0.0037552	2.0786
19	2187197	2187197	rs149949550	T	G	0.016217	0.048163	0.008077	2.54e-09	502154	0.0565671	0.00910652	5.24105e-10	DOT1L	0.0084041	0.685415
19	4366219	4366219	rs732716	G	A	0.291866	-0.022714	0.002074	6.86e-28	563937	-0.0249519	0.00231017	3.40885e-27	SH3G1	-0.0022379	-0.696284
19	4464124	4464124	rs28859427	G	A	0.171907	-0.017973	0.002666	1.63e-11	510109	-0.0179016	0.00297716	1.82136e-09	UBXN6	7.14e-05	-2.04821
19	4502201	4502201	rs8887	C	T	0.569438	0.02991	0.001971	6.01e-52	507430	0.0237398	0.00216963	7.27098e-28	HDGR2	-0.0061702	-24.0827
19	4511278	4511278	rs10422078	T	C	0.431784	-0.018819	0.002257	7.88e-17	464308	-0.0138556	0.00252017	3.84412e-08	PLIN4	0.0049634	-8.68827
19	11412496	11412496	rs78773589	T	C	0.004277	0.080291	0.014681	4.63e-08	552445	0.0965579	0.0158958	1.24429e-09	TSN16	0.0162669	1.57066
19	33754548	33754548	rs78744187	T	C	0.082111	0.034659	0.003538	1.26e-22	509179	0.0381405	0.00399121	1.22258e-21	CEBPA	0.0034815	-0.986907
19	41305138	41305138	rs184088518	T	G	0.022571	-0.110859	0.006504	4.28e-65	563928	-0.102006	0.00738782	2.30459e-43	EGLN2	0.008853	-21.7311
19	41306650	41306650	rs61750953	T	C	0.015338	-0.090721	0.007563	4.11e-33	563295	-0.0866456	0.00861692	8.70687e-24	EGLN2	0.0040754	-9.32602
19	44278781	44278781	rs563995	A	G	0.228703	0.024952	0.002257	2.26e-28	562860	0.0223674	0.00254705	1.6103e-18	KCNN4	-0.0025846	-9.8528
19	45715976	45715976	rs3803906	G	A	0.345824	0.022627	0.00196	8.59e-31	562797	0.0242151	0.00224093	3.23087e-27	EX3L2	0.0015881	-3.57533
19	45809208	45809208	rs8111989	C	T	0.306379	0.017876	0.002009	6.15e-19	562996	0.0188788	0.00220291	1.0352e-17	KCRM	0.0010028	-1.22615
19	47559438	47559438	rs60118491	A	G	0.626164	-0.017165	0.002021	2.09e-17	508980	-0.0150569	0.00226456	2.95201e-11	TM160	0.0021081	-6.14997
19	47625315	47625315	rs309193	T	C	0.200694	0.022826	0.002349	2.75e-22	563941	0.0240943	0.0025996	1.88851e-20	SAE1	0.0012683	-1.83679
19	50017538	50017538	rs150420714	C	G	0.008626	0.085091	0.01049	5.25e-16	506944	0.087428	0.011841	1.54162e-13	FCGRN	0.002337	-2.46782
19	50025208	50025208	rs117080418	A	T	0.010609	0.066418	0.010035	3.75e-11	495472	0.0677978	0.01129	1.91217e-09	FCGRN	0.0013798	-1.7075
19	50988865	50988865	rs12978280	T	C	0.039717	0.034226	0.00506	1.4e-11	510120	0.0349126	0.0056948	8.75466e-10	EMC10	0.0006866	-1.79611
20	10974785	10974785	rs6108789	G	C	0.515414	0.010649	0.001853	9.4e-09	560786	0.0141634	0.0020675	7.35928e-12	CT187	0.0035144	3.10629
20	43038249	43038249	rs6031587	T	C	0.072466	0.028923	0.00367	3.43e-15	563001	0.0247524	0.00405225	1.00688e-09	HNF4A	-0.0041706	-5.46768
20	43042364	43042364	rs1800961	T	C	0.031107	0.074343	0.005326	3.06e-44	559201	0.0657969	0.00589714	6.58708e-29	HNF4A	-0.0085461	-15.333
20	52560126	52560126	rs1055253	G	A	0.417471	-0.010593	0.001869	1.49e-08	562361	-0.0114207	0.00208126	4.0794e-08	BCAS1	-0.0008277	-0.43741
20	55990405	55990405	rs737092	T	C	0.509989	-0.013115	0.001894	4.6e-12	563001	-0.0142197	0.00207755	7.6766e-12	RBM38	-0.0011047	-0.222411
20	56119037	56119037	rs6070139	A	G	0.40291	-0.023419	0.001878	1.16e-35	562999	-0.017872	0.00214371	7.62429e-17	PCKGC	0.005547	-18.8177
20	56138040	56138040	rs2070755	C	G	0.502434	0.019156	0.001864	9.45e-25	563941	0.0115393	0.00207696	2.76209e-08	PCKGC	-0.0076167	-16.4658
20	57594684	57594684	rs34524896	T	C	0.048544	0.030464	0.004372	3.32e-12	562972	0.033743	0.00494621	8.97905e-12	TBB1	0.003279	-0.432092
21	16339172	16339172	rs2229742	C	G	0.103421	-0.02501	0.003033	1.73e-16	562359	-0.030836	0.00334621	3.10735e-20	NRIP1	-0.005826	3.74566
21	16716430	16716430	rs146254580	G	A	0.017984	-0.052548	0.007288	5.82e-13	563946	-0.0456203	0.00827278	3.49763e-08	NRIP1	0.0069277	-4.77885
21	35356706	35356706	rs2834317	A	G	0.153457	-0.034984	0.002579	7.02e-42	560784	-0.0391204	0.00287602	3.88141e-42	ATPO	-0.0041364	0.257348
21	35390852	35390852	rs16997893	C	T	0.396448	-0.013376	0.001888	1.46e-12	559202	-0.0141005	0.00209765	1.79207e-11	RT06	-0.0007245	-1.089
21	37834258	37834258	rs128494	T	C	0.237857	-0.03245	0.002208	7.49e-49	562358	-0.0299683	0.00242652	4.85173e-35	CLD14	0.0024817	-13.8114
21	38021157	38021157	rs57655466	C	A	0.310273	-0.015238	0.002011	3.73e-14	561504	-0.0143064	0.00228353	3.72746e-10	SIM2	0.0009316	-3.9997
21	38078280	38078280	rs77659217	T	C	0.191009	0.01668	0.002477	1.71e-11	508095	0.018816	0.00278879	1.50918e-11	SIM2	0.002136	0.0542551
21	40468838	40468838	rs4817988	A	G	0.274347	0.015718	0.002084	4.76e-14	562535	0.0159253	0.00237313	1.93747e-11	PSMG1	0.0002073	-2.60963
21	45746102	45746102	rs17850433	C	T	0.011806	-0.059444	0.009011	4.34e-11	503325	-0.0631994	0.0101738	5.23189e-10	K6PL	-0.0037554	-1.08117
22	29977229	29977229	rs71640299	A	G	0.04931	-0.023489	0.004281	4.18e-08	563004	-0.0296547	0.0048695	1.12993e-09	NIPS1	-0.0061657	1.56812
22	30529741	30529741	rs5753021	A	G	0.120172	-0.017737	0.002854	5.27e-10	559197	-0.0234584	0.00316534	1.25338e-13	HORM2	-0.0057214	3.62373
22	36766481	36766481	rs2413399	G	A	0.682578	-0.01563	0.001988	3.92e-15	562861	-0.0132526	0.00220994	2.01237e-09	MYH9	0.0023774	-5.71042
22	37333367	37333367	rs7292430	A	G	0.023018	-0.044852	0.006504	5.53e-12	563938	-0.0472351	0.00738782	1.61983e-10	IL3RB	-0.0023831	-1.46674
22	37411733	37411733	rs140768200	G	T	0.021683	-0.052653	0.006699	4.01e-15	563946	-0.0502393	0.00763653	4.74206e-11	THTR	0.0024137	-4.07282
22	37416824	37416824	rs138159140	T	C	0.021988	0.046046	0.006565	2.41e-12	563942	0.0490786	0.00746733	4.9497e-11	THTM	0.0030326	-1.31256
22	37417326	37417326	rs117329814	T	C	0.017933	-0.072046	0.007173	1.04e-23	562086	-0.0716988	0.00811986	1.04629e-18	THTM	0.0003472	-5.00262
22	37433654	37433654	rs12167572	T	C	0.007425	0.06961	0.012221	1.26e-08	507356	0.0857109	0.0137495	4.55357e-10	THTM	0.0161009	1.44202
22	37462173	37462173	rs139105452	T	C	0.011391	-0.099718	0.009479	7.56e-26	509478	-0.107473	0.010736	1.37085e-23	TMPS6	-0.007755	-2.25847
22	37490572	37490572	rs73160067	G	A	0.012741	-0.065857	0.008688	3.6e-14	562195	-0.0771564	0.00987336	5.5137e-15	TMPS6	-0.0112994	0.814859
22	38606989	38606989	rs8139952	A	C	0.53561	0.014026	0.001877	8.17e-14	563938	0.0119903	0.00214288	2.20102e-08	MAFF	-0.0020357	-5.4304
22	43114551	43114551	rs8138197	A	G	0.473596	0.02714	0.001889	9.7e-47	562850	0.0257277	0.00215292	6.48305e-33	A4GAT	-0.0014123	-13.825
22	44361713	44361713	rs12165526	A	T	0.098716	0.023035	0.003138	2.23e-13	563000	0.020794	0.00356978	5.71035e-09	SAM50	-0.002241	-4.40836
22	45977415	45977415	rs16994265	T	C	0.088319	0.031946	0.003366	2.43e-21	559846	0.0323609	0.00371172	2.81731e-18	FBLN1	0.0004149	-3.06423
22	46042979	46042979	rs5765558	G	A	0.396906	-0.016298	0.001895	8.53e-18	559201	-0.0153667	0.0021037	2.78031e-13	ATX10	0.0009313	-4.51314
22	46292665	46292665	rs62226013	A	G	0.006426	-0.073077	0.012387	3.75e-09	510123	-0.0816306	0.0140001	5.51952e-09	WNT7B	-0.0085536	-0.16787
22	46324933	46324933	rs56079916	C	G	0.357661	0.023177	0.002056	1.91e-29	496387	0.0241772	0.00229457	5.85007e-26	WNT7B	0.0010002	-3.48613
22	46380593	46380593	rs73446600	G	T	0.437086	0.017483	0.002205	2.34e-15	450558	0.0180002	0.00244921	1.99129e-13	WNT7B	0.0005172	-1.92992
Missing loci after adjustment
CHR	POS	POS	SNP	A1	A2	freq	b	se	p	N	bC	bC_se	bC_pval	NearestGene	dBeta	dP
1	1713348	1713348	rs10907195	T	C	0.440617	-0.011165	0.001884	3.19e-09	562858	-0.00989497	0.00214873	4.12422e-06	NADK	0.00127003	-3.11155
1	7836659	7836659	rs11121022	C	A	0.42938	0.010507	0.001854	1.5e-08	563004	0.00874859	0.00212368	3.79613e-05	VAMP3	-0.00175841	-3.40325
1	12665665	12665665	rs183458742	C	T	0.00421	0.09358	0.01662	1.84e-08	499549	0.0885914	0.0187186	2.21438e-06	DHRS3	-0.0049886	-2.08043
1	16504381	16504381	rs7538833	T	C	0.375356	-0.011283	0.001914	3.82e-09	562858	-0.00873118	0.00217375	5.90306e-05	ARHGJ	0.00255182	-4.18901
1	16521721	16521721	rs114647087	T	C	0.0267	0.035008	0.006044	7.12e-09	508758	0.0293894	0.00680448	1.56649e-05	ARHGJ	-0.0056186	-3.34245
1	22007443	22007443	rs72660363	T	C	0.160206	-0.015338	0.002533	1.45e-09	563005	-0.0152686	0.00289195	1.29395e-07	UBP48	6.94e-05	-1.95055
1	26146514	26146514	rs1127818	C	G	0.525537	0.013071	0.001849	1.62e-12	563943	0.0074555	0.00209097	0.000363065	MFR1L	-0.0056155	-8.35047
1	28538204	28538204	rs490633	A	G	0.291795	0.012064	0.002015	2.18e-09	562360	0.0115148	0.00223318	2.51938e-07	DNJC8	-0.0005492	-2.06284
1	33830413	33830413	rs4653102	T	C	0.453463	0.01161	0.001842	3e-10	563002	0.00967687	0.00211369	4.69007e-06	PHC2	-0.00193313	-4.19406
1	39302880	39302880	rs7541734	T	C	0.729196	-0.012991	0.002066	3.29e-10	563945	-0.00999121	0.00227751	1.14979e-05	RRAGC	0.00299979	-4.54342
1	46462457	46462457	rs115858566	A	G	0.015791	0.045366	0.00744	1.11e-09	563944	0.0344734	0.00851431	5.14632e-05	MAST2	-0.0108926	-4.66617
1	46641837	46641837	rs12752892	A	G	0.121408	-0.017135	0.002932	5.25e-09	563940	-0.0145835	0.00334023	1.26535e-05	P55G	0.0025515	-3.38205
1	47704243	47704243	rs34948655	G	C	0.15107	-0.014281	0.002567	2.71e-08	562937	-0.0153106	0.0029492	2.0868e-07	TAL1	-0.0010296	-0.886512
1	51478336	51478336	rs35311109	A	T	0.34408	0.011484	0.001972	5.94e-09	561852	0.0096902	0.00225096	1.67045e-05	CDN2C	-0.0017938	-3.44905
1	56605746	56605746	rs778125	G	A	0.355312	0.010771	0.00192	2.08e-08	560783	0.00598089	0.00212535	0.00489183	LPP3	-0.00479011	-5.37141
1	59656909	59656909	rs34370185	T	G	0.286141	0.012333	0.002035	1.4e-09	563939	0.0100237	0.00233233	1.72565e-05	FGGY	-0.0023093	-4.09082
1	93468092	93468092	rs11164857	C	T	0.111586	0.016329	0.002983	4.51e-08	563945	0.0164684	0.00332871	7.52205e-07	FA69A	0.0001394	-1.22216
1	94514082	94514082	rs17392417	T	C	0.012545	0.046003	0.008342	3.57e-08	563301	0.0408663	0.00949762	1.68661e-05	ABCA4	-0.0051367	-2.67435
1	110470764	110470764	rs333947	A	G	0.150329	0.015569	0.002606	2.38e-09	558756	0.0111586	0.00287369	0.000103166	CSF1	-0.0044104	-4.63696
1	112145503	112145503	rs12045658	C	T	0.23541	0.011899	0.002165	3.98e-08	563943	0.0131075	0.00246949	1.10977e-07	RAP1A	0.0012085	-0.44535
1	120272726	120272726	rs3828090	A	G	0.275901	0.011611	0.002078	2.38e-08	559203	0.00861269	0.00231362	0.000197176	SERA	-0.00299831	-3.91828
1	151762108	151762108	rs868868	T	C	0.341071	0.011241	0.001951	8.53e-09	560785	0.0105512	0.00217809	1.27078e-06	TDRKH	-0.0006898	-2.17312
1	155202147	155202147	rs140342156	A	T	0.006356	0.065193	0.01176	3.03e-08	560983	0.0550999	0.0133878	3.86022e-05	GLCM	-0.0100931	-3.10517
1	155301642	155301642	rs149681784	T	C	0.034763	0.031261	0.005258	2.84e-09	563882	0.0249904	0.00597337	2.86884e-05	RUSC1	-0.0062706	-4.00439
1	155747278	155747278	rs6697355	A	G	0.026793	0.035183	0.005775	1.14e-09	563934	0.0282186	0.0065492	1.64204e-05	GON4L	-0.0069644	-4.15848
1	156150188	156150188	rs6693093	G	C	0.421212	0.011403	0.001874	1.19e-09	561447	0.00895823	0.00214037	2.84701e-05	SEM4A	-0.00244477	-4.37884
1	156883546	156883546	rs12137505	G	A	0.404754	-0.011047	0.001924	9.69e-09	559199	-0.0113572	0.0021287	9.5398e-08	PEAR1	-0.0003102	-0.993215
1	175124199	175124199	rs6666417	T	A	0.575802	0.010617	0.001866	1.32e-08	563945	0.0097549	0.00213368	4.83422e-06	TENN	-0.0008621	-2.56375
1	183023696	183023696	rs4652772	G	C	0.453234	-0.011231	0.001852	1.36e-09	560784	-0.0105426	0.00206664	3.37236e-07	LAMC1	0.0006884	-2.3944
1	198867678	198867678	rs60639710	G	T	0.361171	-0.012653	0.001911	3.67e-11	563945	-0.0104122	0.00217122	1.62232e-06	PTPRC	0.0022408	-4.64547
1	203882550	203882550	rs34439010	C	G	0.068504	0.022973	0.003637	2.77e-10	563917	0.0181141	0.00418838	1.52637e-05	RUXE	-0.0048589	-4.74118
1	204254795	204254795	rs4617466	C	T	0.452005	-0.011518	0.001867	7e-10	563931	-0.0105872	0.00213452	7.04964e-07	PKHA6	0.0009308	-3.00307
1	212402580	212402580	rs1472226	A	G	0.403224	-0.013492	0.001883	8.19e-13	559202	-0.00808143	0.00209333	0.000113131	2A5A	0.00541057	-8.1403
1	212428931	212428931	rs11119892	T	G	0.581979	-0.011636	0.00186	4.1e-10	563943	-0.00887845	0.00212868	3.03431e-05	2A5A	0.00275755	-4.86928
1	214141371	214141371	rs75767436	G	A	0.034131	0.02937	0.005088	8.01e-09	563944	0.023506	0.00583106	5.55007e-05	PROX1	-0.005864	-3.84067
1	217356247	217356247	rs11117792	A	G	0.393123	0.012293	0.001885	7.27e-11	562997	0.0115021	0.00214957	8.75248e-08	ERR3	-0.0007909	-3.0806
1	229565204	229565204	rs7521083	T	C	0.166279	0.014948	0.002526	3.36e-09	560785	0.0108816	0.00283057	0.000120884	ACTS	-0.0040664	-4.55603
1	230281698	230281698	rs6541295	A	G	0.162152	0.014657	0.002484	3.72e-09	563945	0.0145568	0.00279498	1.90709e-07	GALT2	-0.0001002	-1.70983
1	231530430	231530430	rs559286	T	C	0.016537	-0.040224	0.007226	2.67e-08	563942	-0.0433278	0.00827786	1.65721e-07	EGLN1	-0.0031038	-0.792866
1	231857439	231857439	rs139339641	A	G	0.028657	0.034868	0.005752	1.38e-09	563934	0.0353913	0.00658682	7.74139e-08	DISC1	0.0005233	-1.74894
1	247602968	247602968	rs4925546	A	G	0.373422	0.011525	0.001902	1.41e-09	559205	0.00952598	0.00210975	6.32547e-06	NALP3	-0.00199902	-3.65187
2	408713	408713	rs62106252	A	G	0.048595	0.024695	0.004446	2.85e-08	546655	0.0249741	0.00506471	8.18098e-07	F150B	0.0002791	-1.45796
2	12104544	12104544	rs972874	G	A	0.240169	0.01183	0.002162	4.57e-08	559846	0.012174	0.00241216	4.48998e-07	LPIN1	0.000344	-0.992328
2	24918159	24918159	rs11890632	T	G	0.108901	-0.017918	0.002989	2.1e-09	559848	-0.0101261	0.00336062	0.00258534	NCOA1	0.0077919	-6.0903
2	25518862	25518862	rs7587636	A	G	0.531714	-0.014607	0.00187	5.99e-15	559698	-0.00981593	0.00205665	1.81701e-06	DNM3A	0.00479107	-8.48193
2	25575523	25575523	rs77541036	G	A	0.037133	0.038019	0.004868	6.02e-15	563942	0.0212982	0.00556104	0.000128194	DNM3A	-0.0167208	-10.3283
2	26928097	26928097	rs1731247	A	G	0.258375	-0.012037	0.002109	1.18e-08	563940	-0.00738341	0.00239415	0.00204283	KCNK3	0.00465359	-5.23835
2	28503941	28503941	rs12468596	A	G	0.213054	0.013948	0.002253	6.2e-10	558761	0.0125685	0.0024908	4.5125e-07	BRE	-0.0013795	-2.86203
2	45886816	45886816	rs526888	A	T	0.289079	0.012371	0.002029	1.12e-09	563940	0.00937402	0.00232734	5.63051e-05	KPCE	-0.00299698	-4.70133
2	45971126	45971126	rs1476333	G	A	0.406741	-0.010944	0.001899	8.49e-09	560313	-0.0100502	0.00216113	3.31241e-06	KPCE	0.0008938	-2.59124
2	46377293	46377293	rs146739907	G	A	0.024999	0.035942	0.00625	9.11e-09	563945	0.0379412	0.00714644	1.10162e-07	KPCE	0.0019992	-1.08251
2	46459998	46459998	rs73926235	T	C	0.018407	-0.042367	0.007302	6.73e-09	563945	-0.0414386	0.00828483	5.68152e-07	KPCE	0.0009284	-1.92645
2	46487144	46487144	rs66830405	A	G	0.267072	-0.011663	0.002102	2.94e-08	563945	-0.0126627	0.00238826	1.14513e-07	EPAS1	-0.0009997	-0.590507
2	47052788	47052788	rs1867818	T	C	0.382906	-0.012654	0.001966	1.25e-10	561913	-0.0103073	0.00224594	4.44776e-06	SOCS5	0.0023467	-4.55123
2	54838613	54838613	rs10193877	C	A	0.207986	-0.012545	0.002274	3.53e-08	563940	-0.0103382	0.00258946	6.54075e-05	SPTB2	0.0022068	-3.26785
2	60757419	60757419	rs2457660	C	T	0.366972	-0.012037	0.001923	3.95e-10	561226	-0.00973037	0.00215409	6.26732e-06	BC11A	0.00230663	-4.20048
2	69100658	69100658	rs77301742	T	C	0.06726	-0.020825	0.003688	1.67e-08	563945	-0.0200656	0.00420162	1.79108e-06	BMP10	0.0007594	-2.0304
2	70273707	70273707	rs13000817	A	G	0.243277	-0.013309	0.002146	5.78e-10	560787	-0.0109646	0.00239842	4.8401e-06	PCBP1	0.0023444	-3.92293
2	85447484	85447484	rs6547599	A	T	0.397686	0.011691	0.001907	9.03e-10	562857	0.0095545	0.00216786	1.04643e-05	TF7L1	-0.0021365	-4.06402
2	112120356	112120356	rs190262259	A	G	0.250575	-0.016423	0.002441	1.8e-11	554983	-0.0105981	0.00278637	0.000142629	B2L11	0.0058249	-6.89894
2	113841030	113841030	rs6734238	G	A	0.40292	-0.011579	0.001875	6.87e-10	559202	-0.00823637	0.00208643	7.89443e-05	IL1FA	0.00334263	-5.06036
2	127451514	127451514	rs111631066	A	G	0.016106	0.042261	0.00773	4.68e-08	559200	0.0471859	0.00884273	9.49589e-08	GLPC	0.0049249	-0.30729
2	137074132	137074132	rs6708702	A	G	0.292062	-0.011933	0.002032	4.41e-09	558114	-0.011899	0.00224803	1.20272e-07	CXCR4	3.4e-05	-1.43573
2	158481992	158481992	rs10164853	G	A	0.077107	0.019918	0.003506	1.38e-08	559847	0.00864873	0.00391038	0.026985	ACV1C	-0.0112693	-6.29124
2	160957626	160957626	rs4076844	A	T	0.763322	0.014103	0.002167	7.86e-11	559846	0.0116579	0.00244333	1.83045e-06	ITB6	-0.0024451	-4.36714
2	165273155	165273155	rs142524111	T	C	0.011051	0.050537	0.009234	4.53e-08	558294	0.0459833	0.0105017	1.19426e-05	GRB14	-0.0045537	-2.421
2	165528876	165528876	rs13389219	T	C	0.392957	-0.017395	0.001883	2.67e-20	559845	0.00190772	0.00206802	0.356275	COBL1	0.0193027	-19.1253
2	177011173	177011173	rs11692796	G	A	0.049355	0.025295	0.004377	7.73e-09	559846	0.0263637	0.00500698	1.39887e-07	HXD3	0.0010687	-1.2576
2	181889062	181889062	rs4362519	C	G	0.338049	-0.012242	0.001954	3.86e-10	559846	-0.00869474	0.00223592	0.000100799	UB2E3	0.00354726	-5.41687
2	211258311	211258311	rs4102442	C	T	0.444338	0.010811	0.001855	5.8e-09	559845	0.0102284	0.00212451	1.47599e-06	LANC1	-0.0005826	-2.40566
2	219250003	219250003	rs3731865	C	G	0.277971	-0.012495	0.002073	1.72e-09	559848	-0.0123883	0.00236407	1.60349e-07	NRAM1	0.0001067	-1.96954
2	219699999	219699999	rs78058190	A	G	0.051698	0.030812	0.00475	9.1e-11	550471	0.00940595	0.0054335	0.0834335	AAKG3	-0.021406	-8.9623
2	228214716	228214716	rs59419007	G	A	0.329386	-0.011853	0.001959	1.5e-09	559847	-0.0115772	0.00224009	2.36416e-07	MFF	0.0002758	-2.19759
3	4624521	4624521	rs73009417	G	C	0.110279	-0.016834	0.002982	1.69e-08	563944	-0.0163148	0.0033822	1.40896e-06	ITPR1	0.0005192	-1.92101
3	4755062	4755062	rs7634227	G	T	0.16845	-0.013475	0.002463	4.56e-08	563945	-0.0131301	0.00274995	1.80016e-06	ITPR1	0.0003449	-1.59635
3	12448184	12448184	rs142397996	A	G	0.007016	0.067214	0.011407	3.92e-09	554972	0.0493895	0.0129496	0.000136754	PPARG	-0.0178245	-4.54265
3	13895542	13895542	rs62234580	A	G	0.282931	0.012448	0.002058	1.5e-09	563933	0.0115862	0.00235152	8.34543e-07	WNT7A	-0.0008618	-2.74536
3	23164663	23164663	rs4263312	A	G	0.546292	0.010896	0.001861	4.92e-09	562981	0.00965515	0.00212951	5.78844e-06	UB2E2	-0.00124085	-3.0706
3	41775915	41775915	rs4973891	C	T	0.043518	-0.025012	0.004573	4.63e-08	563945	-0.0244571	0.00517192	2.25837e-06	ULK4	0.0005549	-1.68821
3	53094194	53094194	rs11712910	A	C	0.28451	0.01461	0.002178	2.04e-11	563944	0.00633808	0.00240031	0.0082778	SMBT1	-0.00827192	-8.60828
3	57931931	57931931	rs55810936	A	G	0.066787	0.020929	0.003743	2.3e-08	563940	0.0204127	0.00427623	1.81027e-06	SLMAP	-0.0005163	-1.89602
3	114520038	114520038	rs12695307	A	T	0.741177	0.012374	0.002111	4.72e-09	562857	0.0125828	0.00239598	1.50773e-07	ZBT20	0.0002088	-1.50438
3	121415720	121415720	rs3732410	C	T	0.230145	0.013003	0.002176	2.34e-09	562361	0.0125917	0.0024242	2.05651e-07	GOGB1	-0.0004113	-1.94391
3	142340201	142340201	rs9857567	A	G	0.162737	-0.014118	0.002492	1.5e-08	561920	-0.0138417	0.0027749	6.09483e-07	PLSI	0.0002763	-1.60887
4	6883012	6883012	rs3733606	T	C	0.178313	0.013207	0.002414	4.56e-08	559205	0.0126216	0.00268158	2.51643e-06	K0232	-0.0005854	-1.74182
4	23813109	23813109	rs7667050	T	C	0.46775	0.011073	0.001843	1.94e-09	563943	0.00948649	0.00211452	7.24513e-06	PRGC1	-0.00158651	-3.57224
4	23888619	23888619	rs2970876	A	G	0.509627	0.011652	0.001848	2.94e-10	563001	0.0112406	0.00211868	1.1238e-07	PRGC1	-0.0004114	-2.58234
4	26152727	26152727	rs77849807	G	A	0.015352	-0.043337	0.007734	2.15e-08	563944	-0.0312297	0.00878884	0.00038038	SUH	0.0121073	-4.24778
4	26166830	26166830	rs10004084	C	T	0.167865	-0.014036	0.002488	1.74e-08	560788	-0.0108661	0.00277145	8.82855e-05	SUH	0.0031699	-3.70534
4	40326896	40326896	rs6840327	T	A	0.482014	-0.011907	0.001849	1.25e-10	563943	-0.0103206	0.00211951	1.11967e-06	ACHA9	0.0015864	-3.95218
4	52935445	52935445	rs12500231	T	A	0.563263	0.010267	0.001871	4.19e-08	559700	0.0105055	0.00208299	4.57181e-07	MIEAP	0.0002385	-1.03787
4	55276359	55276359	rs34467364	G	C	0.012253	-0.04825	0.008624	2.26e-08	563945	-0.0490111	0.0098196	6.002e-07	PGFRA	-0.0007611	-1.42419
4	55794469	55794469	rs114922507	T	C	0.044411	-0.029723	0.004552	6.84e-11	563005	-0.0260688	0.00518204	4.88937e-07	VGFR2	0.0036542	-3.8542
4	55928318	55928318	rs4438810	G	A	0.585469	0.010377	0.001884	3.72e-08	563934	0.00886001	0.00214873	3.73383e-05	VGFR2	-0.00151699	-3.00161
4	79255308	79255308	rs531553	G	A	0.259625	0.012045	0.002099	9.86e-09	563939	0.00990835	0.00238588	3.28278e-05	FRAS1	-0.00213665	-3.52236
4	79617742	79617742	rs77227177	T	C	0.078653	-0.02	0.00344	6.26e-09	562861	-0.0151743	0.00393693	0.000116039	BMP2K	0.0048257	-4.26803
4	79714654	79714654	rs115024193	A	T	0.03501	0.030164	0.005135	4.38e-09	563944	0.0280934	0.00587026	1.70378e-06	BMP2K	-0.0020706	-2.58994
4	83500686	83500686	rs7689845	G	A	0.160111	-0.014494	0.002518	8.87e-09	563939	-0.0141828	0.00279733	3.97522e-07	T150C	0.0003112	-1.65144
4	89737457	89737457	rs7694958	C	T	0.532235	-0.016524	0.001844	3.42e-19	563944	-0.00115187	0.00205977	0.57601	FA13A	0.0153721	-18.2264
4	115321016	115321016	rs4561982	C	T	0.363738	-0.010687	0.001948	4.18e-08	558118	-0.0106521	0.00217551	9.76176e-07	CGT	3.49e-05	-1.36835
4	124756520	124756520	rs77173582	T	C	0.110932	-0.020814	0.002932	1.3e-12	563942	-0.0171594	0.00336905	3.51978e-07	SPY1	0.0036546	-5.43257
4	146480448	146480448	rs13145825	C	T	0.56151	0.013826	0.001852	8.79e-14	563002	0.0115167	0.00212201	5.72236e-08	SMAD1	-0.0023093	-5.81359
4	148457326	148457326	rs10305916	G	T	0.19631	-0.016859	0.002313	3.29e-13	563005	-0.0136894	0.00265074	2.41265e-07	EDNRA	0.0031696	-5.8653
5	1284135	1284135	rs4449583	T	C	0.327779	0.012435	0.002075	2.11e-09	506622	0.00905683	0.00233781	0.000107032	TERT	-0.00337817	-4.70523
5	39743954	39743954	rs72745623	G	A	0.280608	-0.013368	0.002059	8.67e-11	563001	-0.0099218	0.00235235	2.46679e-05	DAB2	0.0034462	-5.45411
5	43627768	43627768	rs6451719	C	T	0.048732	-0.026215	0.004298	1.09e-09	560787	-0.0149461	0.00477576	0.00175061	NNTM	0.0112689	-6.20576
5	55444683	55444683	rs7731626	A	G	0.373497	0.010654	0.00191	2.48e-08	563002	0.0110342	0.00217038	3.69554e-07	ANR55	0.0003802	-1.17323
5	55860781	55860781	rs3936511	G	A	0.190884	0.015317	0.002339	5.97e-11	563943	-0.000673971	0.00259092	0.794765	M3K1	-0.015991	-10.1243
5	121748004	121748004	rs34880730	G	A	0.347365	-0.010956	0.001949	1.93e-08	563942	-0.0110944	0.00223175	6.65476e-07	SNCAP	-0.0001384	-1.53758
5	135419159	135419159	rs4976473	C	A	0.516597	0.010229	0.001845	3.02e-08	563945	0.00830075	0.00206063	5.61896e-05	BGH3	-0.00192825	-3.26965
5	147944487	147944487	rs67809946	G	A	0.5368	0.01165	0.001846	2.89e-10	563927	0.00730882	0.00211701	0.000555587	5HT4R	-0.00434118	-6.28385
5	150038672	150038672	rs14458	C	T	0.022632	-0.03826	0.006413	2.51e-09	563004	-0.0316462	0.00731141	1.50247e-05	SYNPO	0.0066138	-3.77713
6	1605241	1605241	rs56210598	C	G	0.308594	0.013575	0.002109	1.27e-10	546504	0.0102657	0.0023943	1.80649e-05	FOXC1	-0.0033093	-5.15303
6	1708802	1708802	rs9503015	G	C	0.392113	0.011298	0.001948	6.8e-09	542408	0.00912589	0.00217551	2.73079e-05	GMDS	-0.00217211	-3.60378
6	2518115	2518115	rs1272694	C	G	0.234995	0.012471	0.002178	1.06e-08	562860	0.0104404	0.00248054	2.56565e-05	CF195	-0.0020306	-3.38389
6	7884242	7884242	rs17696707	A	G	0.090011	-0.018866	0.003218	4.69e-09	563004	-0.012934	0.00355768	0.000277423	TXND5	0.005932	-4.77197
6	25712496	25712496	rs115902543	A	C	0.014139	0.054982	0.007883	3.18e-12	562362	0.0438487	0.00891498	8.71894e-07	SEGN	-0.0111333	-5.43804
6	26027141	26027141	rs114259939	A	G	0.018794	-0.045012	0.006853	5.27e-11	563004	-0.0359159	0.00779413	4.06415e-06	H4	0.0090961	-4.88716
6	28056250	28056250	rs17710827	T	G	0.041441	0.026683	0.004659	1.04e-08	563006	0.0264756	0.00532875	6.7494e-07	ZN165	-0.0002074	-1.81223
6	29829464	29829464	rs9258755	T	C	0.042703	0.026359	0.004572	8.4e-09	558843	0.0246326	0.00509024	1.30375e-06	HLAG	-0.0017264	-2.19092
6	31293562	31293562	rs191989932	T	A	0.168494	0.021326	0.003468	8.06e-10	440087	0.0150217	0.00380097	7.74773e-05	1B07	-0.0063043	-4.98284
6	31566063	31566063	rs116339629	A	G	0.011654	0.05805	0.008751	3.4e-11	557047	0.0475679	0.00992641	1.65078e-06	NCTR3	-0.0104821	-4.68621
6	31591198	31591198	rs147474235	T	C	0.008435	0.059537	0.01065	2.32e-08	561890	0.0556076	0.0122305	5.45112e-06	PRC2A	-0.0039294	-2.371
6	32489891	32489891	rs112906420	T	C	0.080301	-0.035798	0.006211	8.43e-09	407739	-0.0279038	0.0068438	4.55741e-05	DRB5	0.0078942	-3.73289
6	32537489	32537489	rs114012503	G	A	0.060437	-0.047407	0.006201	2.18e-14	444028	-0.0321408	0.00691215	3.32101e-06	2B11	0.0152662	-8.18281
6	33120882	33120882	rs9277904	A	T	0.581964	-0.013722	0.001876	2.72e-13	561852	-0.00938001	0.00214204	1.19221e-05	COBA2	0.00434199	-7.64178
6	34238084	34238084	rs115614261	A	G	0.046498	0.033671	0.004511	8.71e-14	525161	-0.0188245	0.00511935	0.000235883	NUDT3	-0.0524955	-9.43268
6	41167763	41167763	rs62396356	G	A	0.13298	0.015297	0.002724	2e-08	563002	0.0124682	0.00310897	6.06133e-05	TRML2	-0.0028288	-3.48154
6	41749401	41749401	rs12528644	A	C	0.285057	-0.011898	0.002054	7.08e-09	562997	-0.00586364	0.00234818	0.0125213	FRS3	0.00603436	-6.24762
6	43750587	43750587	rs3025030	C	G	0.134857	-0.01611	0.00283	1.29e-08	509037	-0.00873313	0.00314459	0.00548302	VEGFA	0.00737687	-5.62843
6	43753722	43753722	rs41282644	A	G	0.051777	0.030309	0.004593	4.28e-11	562991	0.0251728	0.00510965	8.3706e-07	VEGFA	-0.0051362	-4.29131
6	43760085	43760085	rs150140289	T	C	0.015214	-0.052139	0.008339	4.16e-10	562294	-0.0427316	0.00946687	6.36762e-06	VEGFA	0.0094074	-4.18488
6	43796181	43796181	rs114773511	T	C	0.026663	0.032854	0.00589	2.49e-08	563923	0.0252371	0.006674	0.000155943	VEGFA	-0.0076169	-3.79677
6	43977005	43977005	rs138975044	A	G	0.007065	-0.077544	0.012652	9.11e-10	503227	-0.0581779	0.0142798	4.61877e-05	CF223	0.0193661	-4.70501
[truncated: 207 more rows]

## Sheet: Supp Table 6
New loci after adjustment
[truncated: 1,383 more rows]

## Sheet: Supp Table 7
New loci after adjustment
[truncated: 1,502 more rows]

## Sheet: Supp Table 8
Analysis Type:	PANTHER Overrepresentation Test (Released 20210224)
[truncated: 272 more rows]

[truncated: 16 more sheets: Supp Table 9, Supp Table 10, Supp Table 11, Supp Table 12, Supp Table 13, Supp Table 14, Supp Table 15, Supp Table 16, Supp Table 17, Supp Table 18, Supp Table 19, Supp Table 20, Supp Table 21, Supp Table 22, Supp Table 23, Supp Table 24]
