# Supplementary figures and images for: Body mass index and adipose distribution have opposing genetic impacts on human blood traits
Source: eLife journal article supplement (doi:10.7554/elife.75317), 2022-02-15

no adj

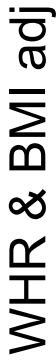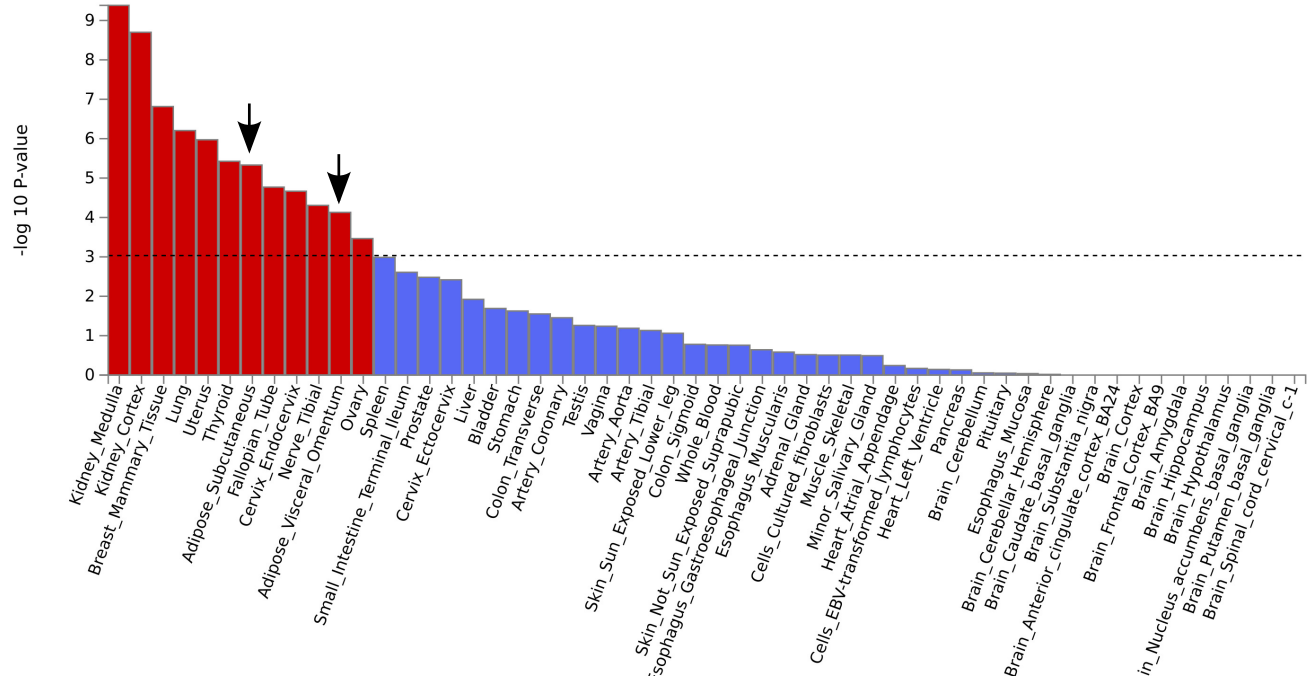

Supplement: supp [file elife_poa_e75317_Figure_2_figure_supplement_2.pdf › elife_poa_e75317_Figure_2_figure_supplement_2.pdf]

## WHR & BMI adj

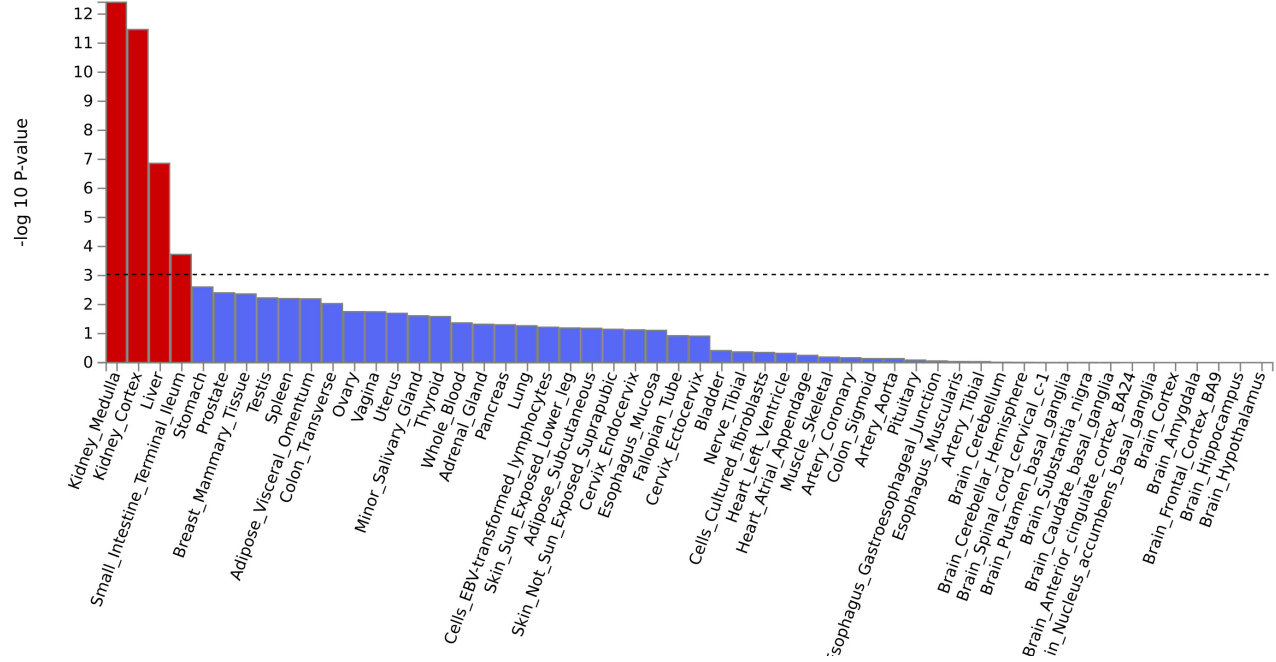

## no adj

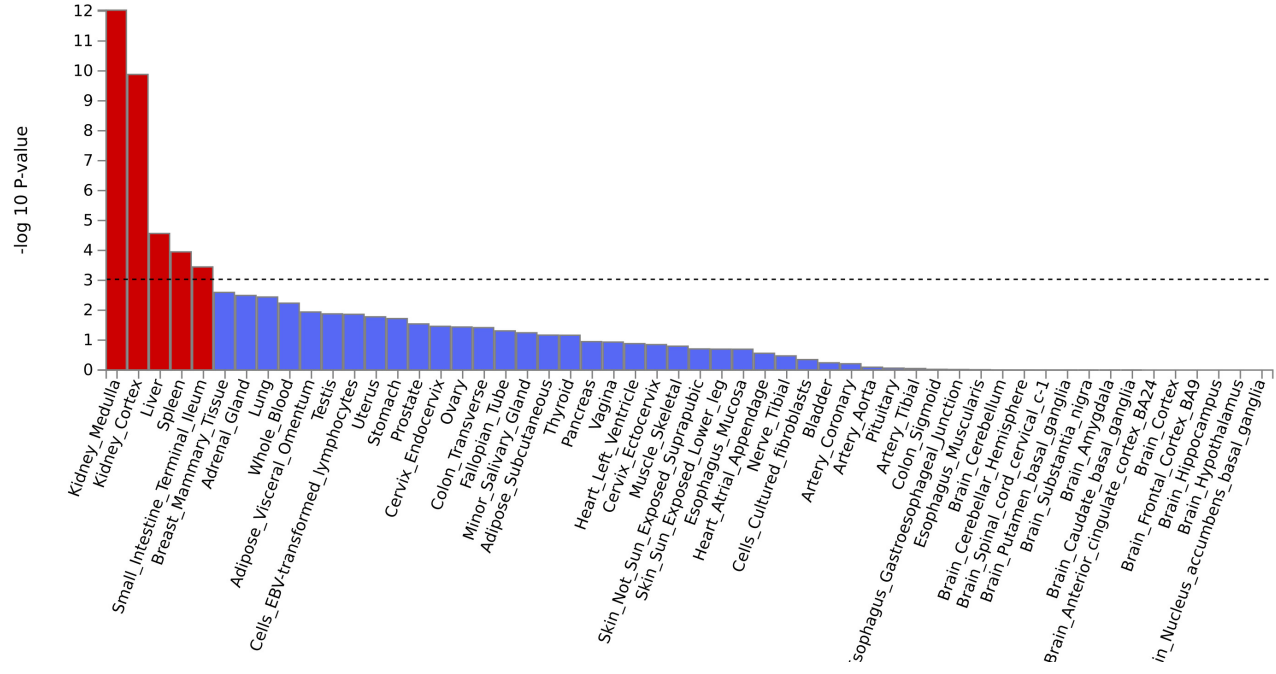

HCT

Supplement: supp [file elife_poa_e75317_Figure_2_figure_supplement_3.pdf › elife_poa_e75317_Figure_2_figure_supplement_3.pdf]

# RBC

no adj

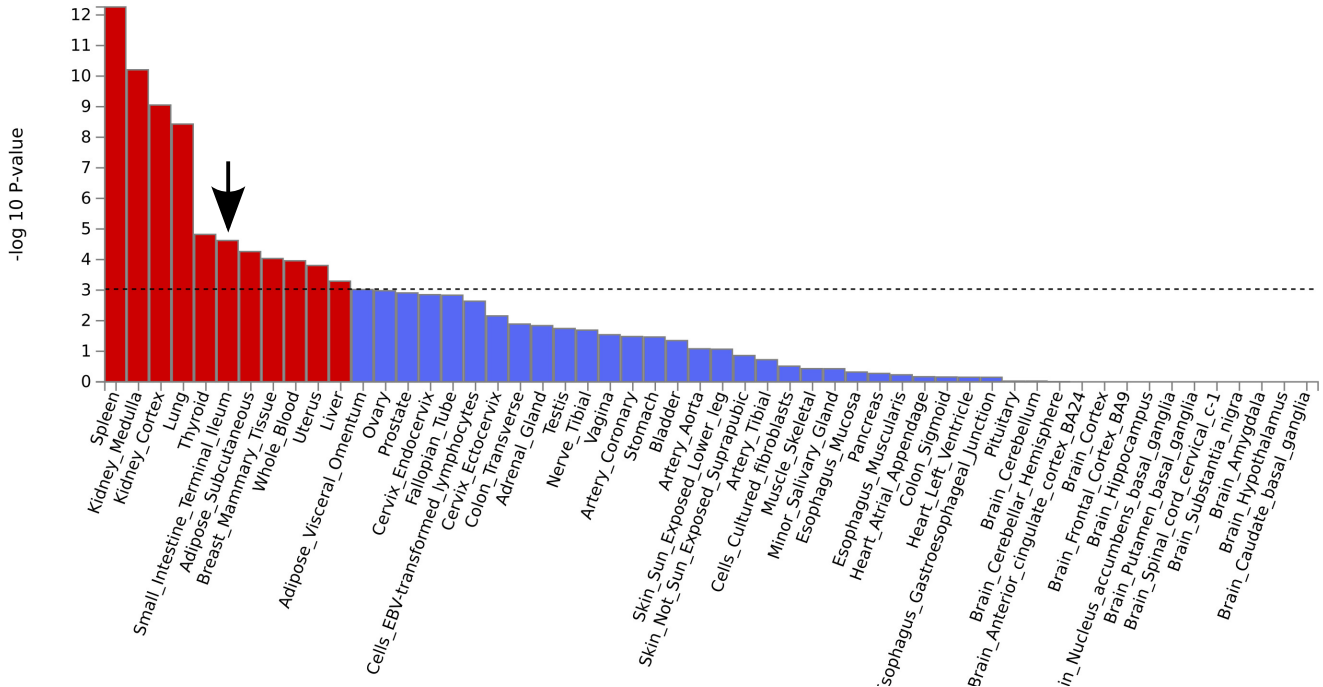

WHR & BMI adj

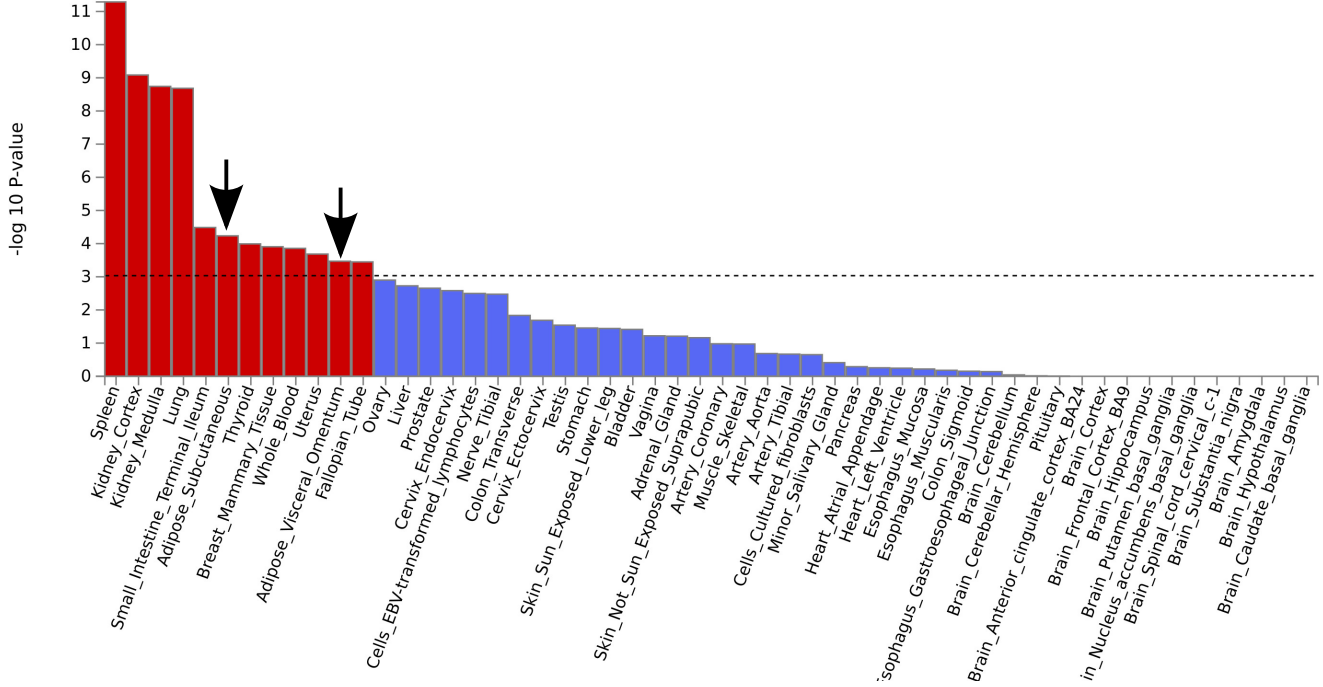

Supplement: supp [file elife_poa_e75317_Figure_2_figure_supplement_4.pdf › elife_poa_e75317_Figure_2_figure_supplement_4.pdf]

PLT

WHR & BMI adj

no adj

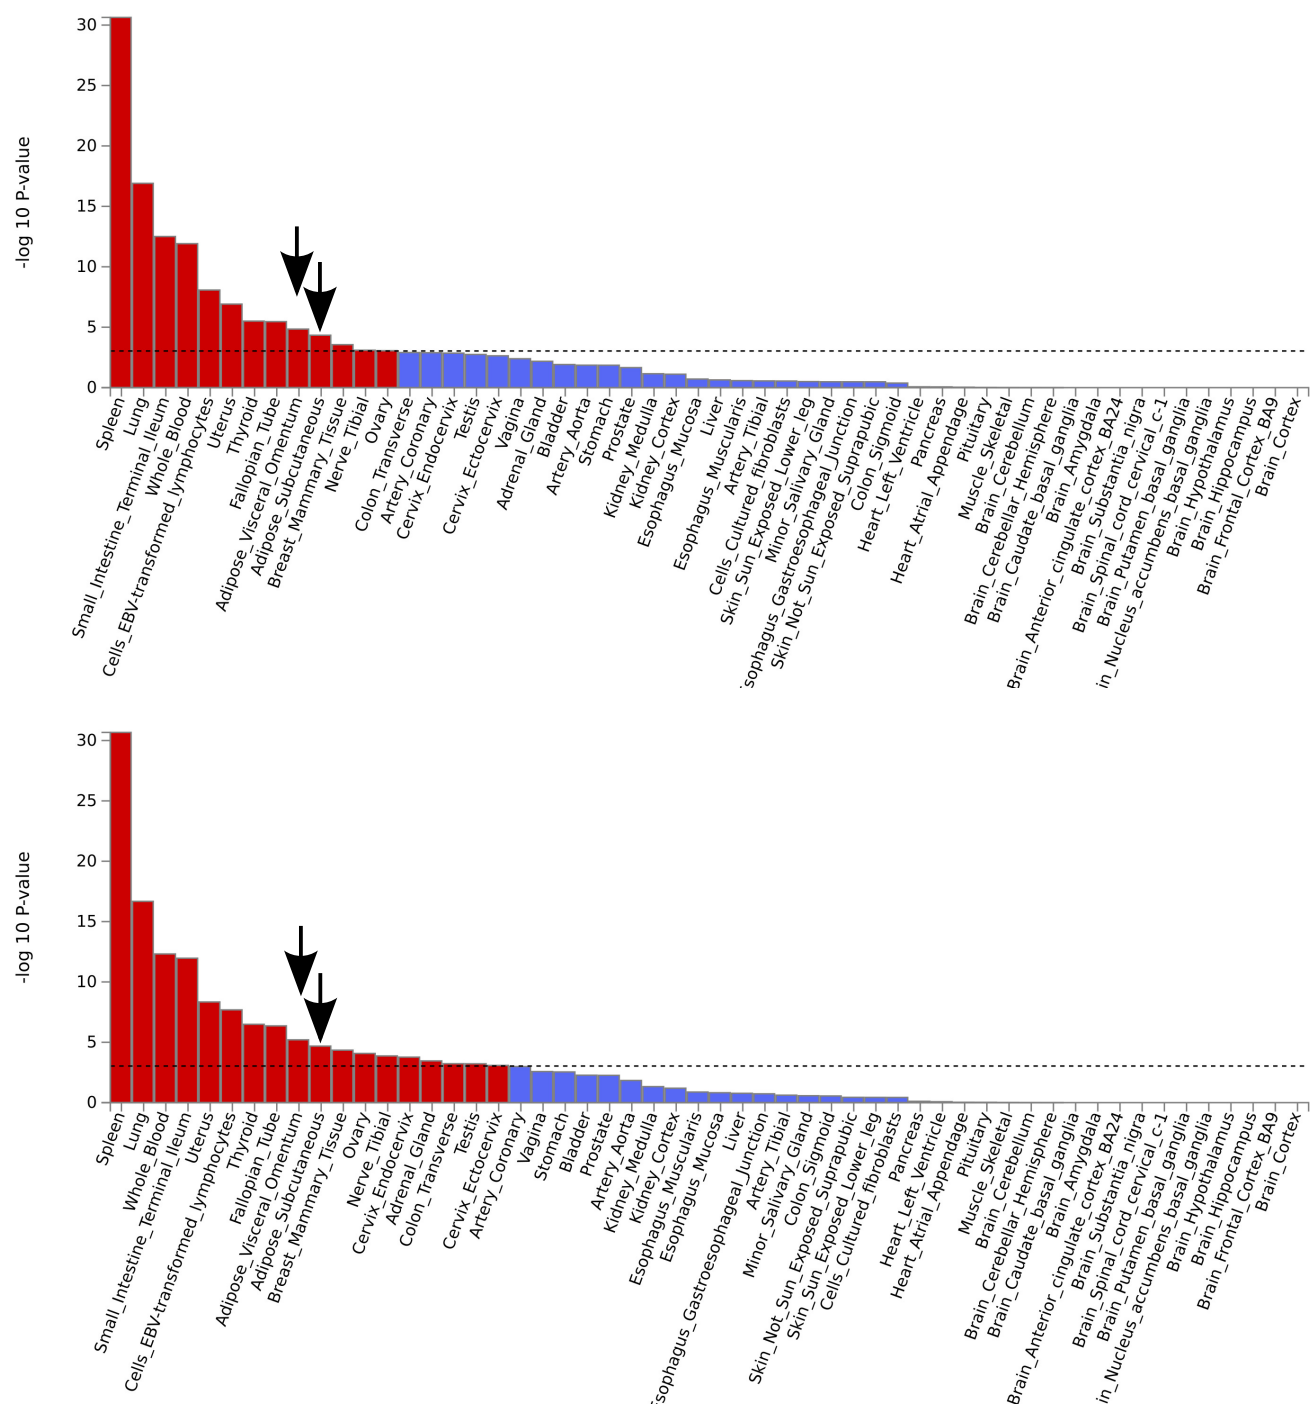

Supplement: supp [file elife_poa_e75317_Figure_2_figure_supplement_5.pdf › elife_poa_e75317_Figure_2_figure_supplement_5.pdf]

# WHR & BMI adj

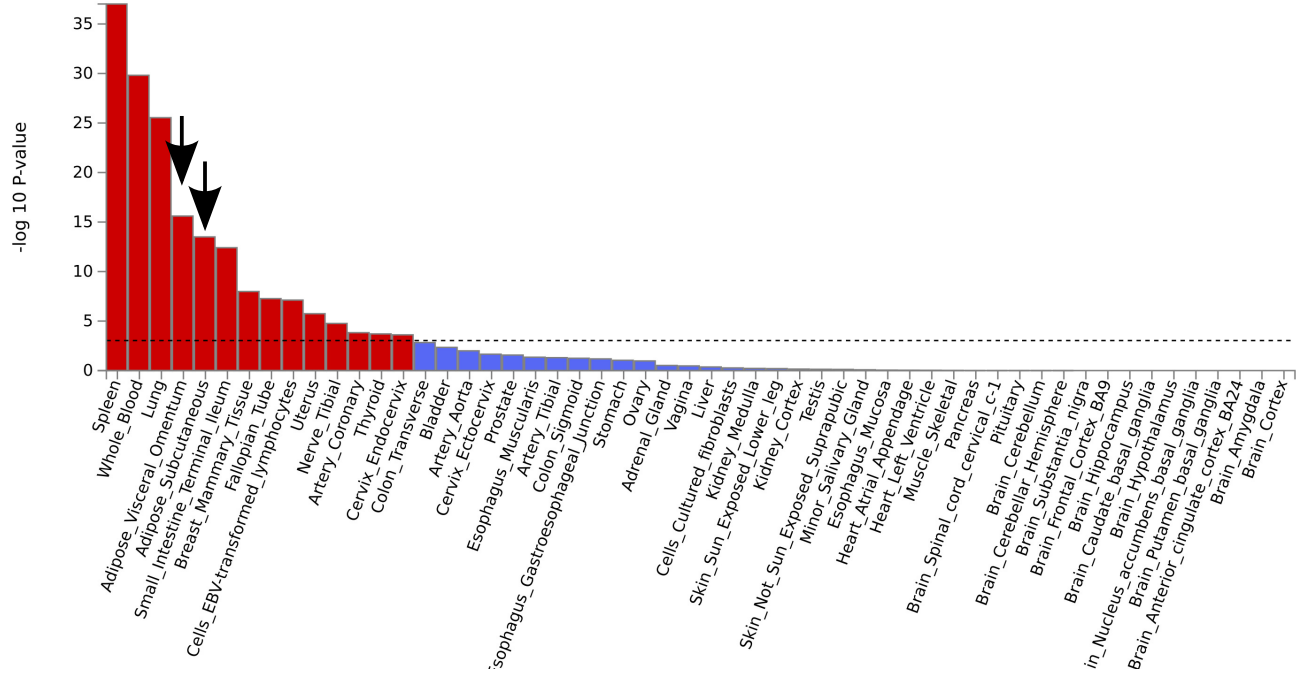

# WBC

## no adj

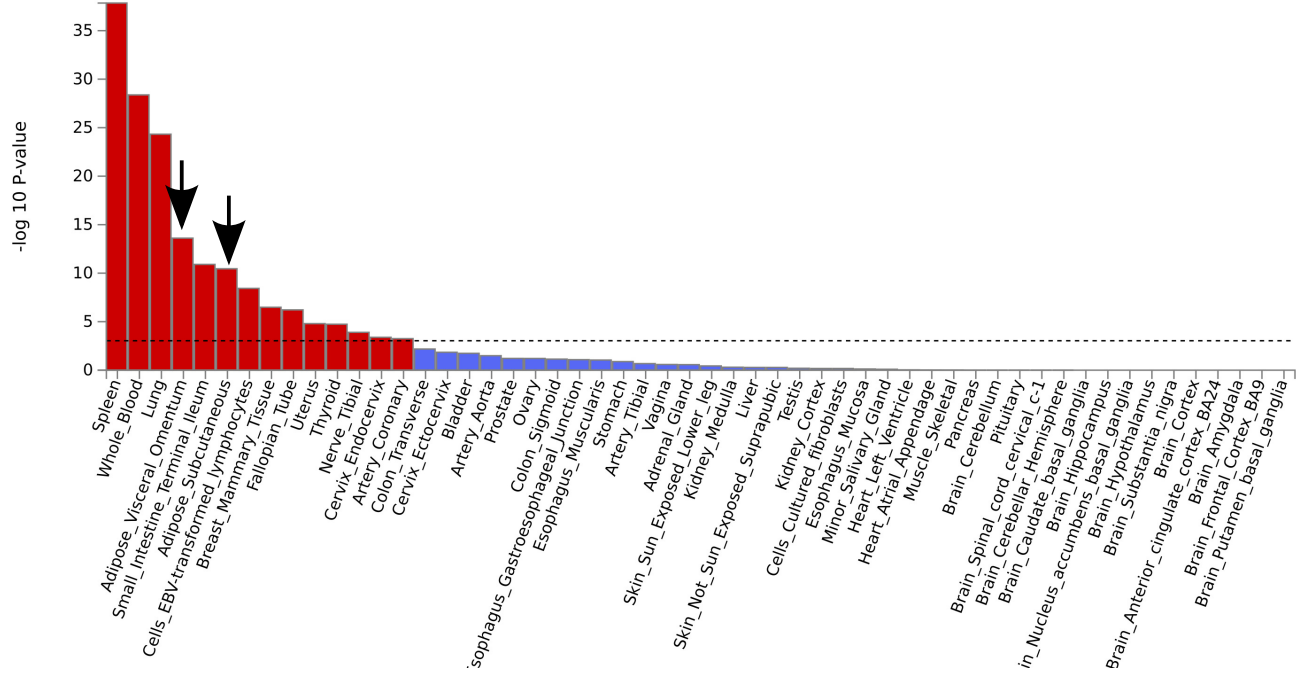

Supplement: supp [file elife_poa_e75317_Figure_2_figure_supplement_6.pdf › elife_poa_e75317_Figure_2_figure_supplement_6.pdf]
